# Supplementary material for: The role of lncRNAs related ceRNA regulatory network in multiple hippocampal pathological processes during the development of perioperative neurocognitive disorders
Source: PeerJ. 2024 Aug 9;12:e17775. doi: 10.7717/peerj.17775 (PMC11318589; doi:10.7717/peerj.17775)
Supplement: Supplemental Information 1 [file peerj-12-17775-s001.xlsx]

## Sheet: primer
Genes	Primers	Sequence (5' to 3')	Length(bp)
Dlg4	Forward primer	GGCTTCATTCCCAGCAAACG	193
ENSMUST00000018700	Reverse primer	CATCGTTGGCACGGTCTTTG
Hcrt	Forward primer	CTCCTTCAGGCCAACGGTAA	129
ENSMUST00000055083	Reverse primer	GGGTGCTAAAGCGGTGGTA
Robo2	Forward primer	TTGCGAATTGTTCATGGGCG	218
ENSMUST00000226478	Reverse primer	ATGGTTGGTTCTGGGTGTCC
Islr2	Forward primer	TGCAGACTGTGCCTACAAGG	176
ENSMUST00000114144	Reverse primer	CTGACTCTACCGTGCGTACC
Yam1	Forward primer	TCAATCTCGGGTGGCTGAAC	233
ENSMUST00000200021.1	Reverse primer	TCAACACGGGAAACCTCACC
Lhx1os	Forward primer	GCCTCCCAGAGAAGTGTGAA	181
ENSMUST00000134800.7	Reverse primer	TACACACTGCAGACAGCTACA
Malat1	Forward primer	GATTTCTCTGCCACATCGCC	126
ENSMUST00000174808.1	Reverse primer	TGGGCATAACCTTGAAACCGA
Lsmem2	Forward primer	TGTCTTACCACCATCGCTGT	213
ENSMUST00000191791.1	Reverse primer	CTAGCCAGACGCAATTTGAGC
GAPDH	Forward primer	ACTCTTCCACCTTCGATGCC	193
ENSMUST00000117757.9	Reverse primer	ACTCTTCCACCTTCGATGCC

## Sheet: Cq
Sample name		DIg4-Cq	Hcrt-Cq	Robo2-Cq	Islr2-Cq	Yam1-Cq	Lhx1os-Cq	Malat1-Cq	Lsmem2-Cq	GAPDH-Cq
Control 1	1	21.995	33.538	25.931	27.81	15.694	29.445	28.617	31.801	19.545
	2	21.936	33.487	25.362	27.858	15.495	29.34	28.378	31.69	19.534
	3	21.994	33.598	25.57	27.813	15.743	29.511	28.07	31.45	19.439
Control 2	1	21.18	31.95	25.583	27.157	14.395	29.469	29.036	31.252	18.386
	2	21.134	32.006	25.381	27.444	14.366	29.599	28.545	31.413	18.237
	3	21.673	32.029	25.599	27.56	14.394	29.513	28.96	31.1	18.229
Control 3	1	22.565	33.234	25.47	27.242	14.912	31.722	29.773	32.598	19.026
	2	21.465	33.587	25.271	27.46	14.945	31.722	29.874	32.35	19.036
	3	22.753	33.047	25.402	27.03	14.975	31.593	29.831	32.507	19.007
Control 4	1	22.049	33.533	25.417	28.522	15.246	31.472	29.743	32.248	18.852
	2	21.543	33.356	25.91	27.948	15.374	31.348	29.837	32.16	18.734
	3	22.549	33.608	25.872	28.097	15.22	31.362	29.88	32.138	18.772
Control 5	1	21.038	32.431	25.763	28.61	14.654	29.668	28.868	31.396	18.434
	2	21.768	32.582	25.546	28.655	14.619	29.736	28.733	31.536	18.641
	3	21.043	32.814	35.614	28.544	14.644	29.714	28.904	31.583	18.953
Control 6	1	21.515	33.874	24.66	27.211	14.714	31.057	29.554	33.393	19.025
	2	21.727	33.935	24.545	27.05	14.726	30.731	29.419	32.547	19.148
	3	21.348	34.014	24.577	27.21	14.756	30.996	29.602	32.34	19.175
Surgery 1	1	21.166	32.543	25.335	25.489	14.894	27.877	27.635	30.552	18.512
	2	21.827	32.535	25.363	25.441	15.176	27.814	27.658	30.438	18.566
	3	21.375	32.584	25.37	25.477	15.002	27.856	27.615	30.483	18.485
Surgery 2	1	21.049	32.718	25.923	27.682	14.474	28.862	27.382	30.045	18.136
	2	21.462	32.374	25.984	27.614	14.204	28.832	27.304	30.12	18.445
	3	21.002	32.858	25.907	27.672	14.513	28.895	27.355	30.162	18.73
Surgery 3	1	20.941	33.712	27.499	28.013	16.383	29.714	28.764	31.082	19.901
	2	20.943	33.279	27.36	28.046	15.806	29.591	28.83	31.152	19.882
	3	20.945	33.683	27.176	28.013	15.772	29.675	28.857	31.18	19.755
Surgery 4	1	22.089	32.638	26.121	29.43	16.377	29.806	28.595	32.465	19.814
	2	22.482	32.613	26.384	29.241	16.523	29.657	28.604	32.528	19.562
	3	22.053	32.66	26.272	29.688	16.312	29.631	28.64	32.132	19.733
Surgery 5	1	21.484	32.364	27.262	27.349	16.356	30.103	29.625	31.917	19.332
	2	21.472	31.817	27.42	27.268	16.176	30.441	29.59	32.173	19.268
	3	21.232	31.783	26.87	27.34	16.374	30.008	29.504	32.375	19.234
Surgery 6	1	20.319	31.347	26.445	28.883	16.072	30.09	27.588	30.808	18.848
	2	20.72	32.03	26.174	29.425	16.088	30.274	27.63	30.45	18.954
	3	20.551	32.164	26.44	28.92	16.023	30.104	27.603	30.818	18.94
