# Supplementary material for: The role of lncRNAs related ceRNA regulatory network in multiple hippocampal pathological processes during the development of perioperative neurocognitive disorders
Source: PeerJ. 2024 Aug 9;12:e17775. doi: 10.7717/peerj.17775 (PMC11318589; doi:10.7717/peerj.17775)
Supplement: Supplemental Information 2 [file peerj-12-17775-s002.xlsx]

## Sheet: lncRNA
lncRNA_id	Gene_id	control1.fpkm	control2.fpkm	control3.fpkm	control4.fpkm	control5.fpkm	control6.fpkm	surgery1.fpkm	surgery2.fpkm	surgery3.fpkm	surgery4.fpkm	surgery5.fpkm	surgery6.fpkm
LNC_000938	XLOC_019648	0.292831	0.564961	0.284967	0.909244	0.380722	0.255343	0.237979	0.577287	0.741748	0.716772	0.356422	0.543829
LNC_000559	XLOC_011687	0.183673	0	0	0	0	0	0.378945	0	0	0	0	0
LNC_005298	XLOC_108901	0.305464	0.353099	0	0.066291	0.058857	0.060129	0.131561	0	0	0.259954	0.329493	0.1291
LNC_006584	XLOC_136464	0.368141	1.14577	1.31229	0.551683	0.720113	0.928514	1.22227	0.582559	0.004667	2.0331	1.39417	1.64188
ENSMUST00000195881.1	ENSMUSG00000102258.1	0.198013	0.363805	0.332754	0.495098	0.272188	0.25766	0.24215	0.322611	0.321181	0.309706	0.179425	0.246112
LNC_002442	XLOC_051782	0.068289	0	0.170846	0.053136	0.050369	0.21541	0	0.144279	0	0.517805	0.432455	0.323825
LNC_000016	XLOC_000438	0.370464	1.23569	0.637646	0.700039	0.719258	0.328932	0.716467	0.477213	0.657137	1.16742	0.789112	0.299814
LNC_002048	XLOC_043378	0.163478	0.211733	0.178353	0.088533	0.065756	0	0	0.346773	0	0	0.171791	0.210049
LNC_002803	XLOC_058759	0	0.11313	0	0	0.057395	0.351811	0.093337	0.254281	0	0	0.199516	0.121976
LNC_003017	XLOC_062915	1.13234	0.899976	0.655362	0.916145	0.846237	0.5894	0.683552	0.718878	1.17662	1.15654	1.1378	1.04079
LNC_004425	XLOC_091550	0	0	0	0	0	0.104016	0	0.328913	0	0.156743	0.042267	0.267993
LNC_002216	XLOC_047453	0.202864	0.334109	0.168581	0.065611	0.079286	0.133836	0.049921	0.195699	0.201141	0.091465	0.138462	0.502647
LNC_005179	XLOC_106433	0	0.004757	0	0.002632	0	0	0	0	0	0	0.539605	0
LNC_003812	XLOC_078188	0.772074	0.302434	0.436426	0.595347	0.433183	0.290581	0.39082	0.452444	0.441244	0.638449	0.483037	0.625414
LNC_000254	XLOC_004669	0.08137	0.219318	0.025792	0.215908	0.217509	0	0.140924	0.174573	0.059364	0.178349	0.288473	0.343646
ENSMUST00000158821	ENSMUSG00000089446	0.210604	0.203954	0.120661	0.699699	0.65605	0.542961	0.123328	0.876067	0.75817	0.180385	0.463058	0.141821
LNC_005105	XLOC_104699	0.451753	0.263353	0.439223	0.33547	0.310349	0.327107	0.211091	0.397983	0.440323	0.711689	0.436171	0.527286
ENSMUST00000146801.7	ENSMUSG00000087368.7	0.370284	0.024128	0.012496	0.042096	0.137617	0.055547	0.092188	0.407819	0.039256	0.443689	0.270458	0.082001
LNC_002418	XLOC_051454	0	0.085177	0	0	0	0.097677	0	0.089754	0.346518	0	0.35471	0
LNC_004789	XLOC_098639	0	0	0	0.397792	0	0	0	0.013608	0.016031	0	0.023628	0
ENSMUST00000159637.7	ENSMUSG00000090086.7	2.4634	1.9213	1.75941	1.69527	1.26038	1.70935	1.80982	1.60241	1.69625	1.76924	1.69695	1.69344
LNC_001736	XLOC_036305	0.406705	0.446535	0.467345	0.570503	0.264569	0.414498	0.295536	0.467761	0.567066	0.509481	0.560589	0.709039
LNC_002487	XLOC_052706	0.056311	0.222704	0.012971	0.63364	0.943618	0.083879	0.340728	0.146588	0.924844	0.335538	0.346256	0.823205
LNC_000448	XLOC_008934	0.039312	0.111661	0.224837	0.08733	0.177687	0	0.210814	0.11187	0.113745	0.467811	0.295831	0.329642
LNC_001884	XLOC_039664	1.02759	0.386414	0.177807	0.354157	0.359093	0.285385	0.206809	0.338367	0.405931	0.174484	0.470455	1.56052
LNC_006767	XLOC_140920	0.267169	0.291883	0.441738	0.436249	0.513155	0.37004	0.479968	0.375714	0.552952	0.760134	0.454426	0.446737
ENSMUST00000200940.1	ENSMUSG00000106981.1	7.61941	4.9908	5.47118	4.38213	6.07254	5.67796	7.4602	5.59112	5.50341	6.14822	6.82334	6.3664
LNC_006310	XLOC_130958	0	0	0	0	0	0	0	0.041853	0	0.349313	0	0
LNC_004440	XLOC_091689	10.2183	8.89806	7.41564	5.91395	6.53175	6.61062	5.63809	6.37475	7.79503	9.77401	9.04349	7.74092
ENSMUST00000217151.1	ENSMUSG00000074385.3	0.597379	0	0	0.051921	0.171019	0	0	0	0.042828	0	0	0
LNC_005648	XLOC_116227	0.902636	0.710858	0.660852	0.697035	0.464946	0.648816	0.599008	0.565881	0.692021	0.703802	0.693059	0.824353
LNC_005161	XLOC_106037	0.491319	0.463248	9.64388	0.453113	0.655726	11.4183	0.793682	0.546884	0.432875	4.08657	0.501504	11.1524
LNC_005325	XLOC_109303	0.074347	0.246219	0.204894	0.168316	0.222842	0.189714	0.233202	0.137121	0.390164	0.450557	0.291009	0.282006
LNC_004933	XLOC_101428	0	0.168138	0	0.169164	0.083566	0.186679	0	0	0.142683	0.369085	0.138829	0
LNC_001272	XLOC_024934	0	0.012178	0.043198	0.381573	0	0	0.038317	0	0.186287	0.124106	0.231106	0
ENSMUST00000159407.2	ENSMUSG00000089812.2	0.187981	0.862157	0.600878	0.699478	0.943023	0.358554	0.340147	1.12607	0.996296	0.668184	0.281428	0.376238
LNC_000305	XLOC_005956	1.7693	0.665258	0.866172	0.5082	0.359804	0.421051	0.431918	0.685519	0.618456	1.25971	0.870165	0.782347
LNC_001968	XLOC_042076	0.165846	0.403364	0.16994	0.295526	0.079089	0.322653	0	0.291507	0.223411	0.256163	0.16562	0.173478
LNC_004237	XLOC_087263	0.762005	0.605073	0.729351	0.640546	0.623224	0.452992	0.467347	0.505533	0.876856	1.01196	0.942846	0.884354
ENSMUST00000208892.1	ENSMUSG00000087088.2	1.53631	1.17556	1.4992	1.6142	1.27361	1.55618	1.28686	1.39503	1.54014	1.31414	1.35418	1.06868
LNC_003445	XLOC_070794	0	0	0	0	0	0	0	0	0	0.419301	0.083181	0
LNC_005954	XLOC_123625	0.386436	0.486899	0.481252	0.573391	0.372667	0.468613	0.421714	0.464762	0.481844	0.409465	0.385049	0.404326
LNC_004750	XLOC_097532	0.829443	0.428759	0.53032	0.683978	0.202827	0.30234	0.32009	0.345511	0.466222	0.508945	0.536791	0.488149
LNC_002564	XLOC_054161	0	0	0	0	0	0.073522	0	0.282221	0	0	0	0.113292
LNC_003234	XLOC_066620	0	0	0.753275	0.129654	0	0.062539	0	0.044931	0	0.112494	0	0
LNC_001240	XLOC_024440	0.601674	0.653316	0.800559	0.759032	0.389393	0.50993	0.498969	0.529764	1.05281	0.971172	1.01268	0.613987
ENSMUST00000229708.1	ENSMUSG00000115867.1	0.872285	2.145	1.11742	1.17053	2.21862	1.77922	1.20345	1.14352	1.07715	1.2791	1.04145	0.829902
LNC_000534	XLOC_011272	0	0	0	0	0	0.325624	0.019405	0	0	0.071004	0	0
ENSMUST00000209101.1	ENSMUSG00000109491.1	0.37316	0.224694	0.456114	0.069	0.144861	0.146695	0.087297	0.194999	0.15318	0.194858	0.100878	0.035683
ENSMUST00000192656.1	ENSMUSG00000104523.1	0.314446	0.64118	0.387358	0.632026	0.32769	0.166785	0.27095	0.376091	0.593884	0.498321	0.372826	0.362662
LNC_003378	XLOC_069611	0.323977	0.095502	0	0	0	0	0	0	0	0.136855	0.101025	0.284288
ENSMUST00000232811	ENSMUSG00000117004	0.921148	0.887037	0.505871	0.735101	0.303363	0.381759	0.194339	0.59239	0.327006	0.244421	0.402118	0.62999
LNC_002101	XLOC_045115	0	0.052961	0	0.053994	0.127453	0	0.071223	0.117638	0	0.1541	0.300037	0.089098
LNC_003172	XLOC_065635	0.283352	0.175309	0.738451	0.146031	0.121034	0.098885	0.287292	0.159873	0.176322	0.150398	0.109075	0.151816
LNC_002610	XLOC_055627	1.51352	1.56492	2.03381	2.49028	1.65885	1.17158	1.42813	1.64721	2.24138	1.88618	2.4984	1.77304
LNC_000783	XLOC_016530	0.310874	0	0	0	0	0	0	0	0	0	0	0.071856
LNC_001693	XLOC_034886	0.471613	0	0	0	0	0	0	0	0	0	0	0.155987
LNC_003331	XLOC_068582	0.328622	0.063077	0.172866	0.205382	0.153861	0.233156	0.045488	0.236981	0.145055	0.11067	0.416988	0.12515
LNC_004558	XLOC_093875	0	0	0.183173	0.022276	0.114296	0.263724	0.191186	0.316484	0	0.324523	0.181726	0
ENSMUST00000150389.1	ENSMUSG00000087556.1	0	0.387432	0.595279	0	0.259317	0.341326	0.294445	0.340011	0.2062	0.331653	0.128849	0.201061
LNC_005821	XLOC_120307	0	0	0	0	0	0	0	0	0	0.346221	0	0
ENSMUST00000151719.1	ENSMUSG00000086600.8	1.02259	0.378754	0.367714	0.282451	0.526355	0.527593	0.36028	0.420566	0.533293	0.477961	0.134478	0.239978
ENSMUST00000195529.1	ENSMUSG00000103761.1	0.192614	0.528704	0.268891	0.507399	0.317414	0.17996	0.170147	0.153508	0.290075	0.254519	0.098964	0.246781
ENSMUST00000181443.1	ENSMUSG00000097142.1	0.483137	1.06014	1.23139	1.33037	0.924779	0.739375	0.888883	0.924658	1.43363	1.5306	1.63169	1.48973
LNC_000281	XLOC_005210	0.138475	0.055016	0.157118	0.257726	0.243806	0.062338	0	0.168836	0.258935	0.204446	0.466539	0.325981
LNC_006676	XLOC_138721	0.438308	0.555381	0.200382	0.475024	0.118056	0.252819	0.398943	0.43118	0.639509	0.791983	0.276171	0.900142
LNC_003501	XLOC_071976	0.294308	0	0	0	0	0	0	0.11342	0.109713	0	0.499086	0
ENSMUST00000153057.7	ENSMUSG00000087380.7	1.98638	2.18929	2.10832	2.72965	1.98604	2.55234	1.88004	1.85886	2.67207	1.84634	2.34753	2.88181
LNC_002405	XLOC_051275	0	0.340641	0	0	0.165957	0	0	0	0	0	0	0
ENSMUST00000192861.5	ENSMUSG00000102828.5	0.358688	0	0	0	0	0	0.391688	0	0	0	0	0
LNC_004254	XLOC_087679	0.027744	0.20853	0.383644	0.376979	0	0	0	0	0.161617	0.232333	0	0
ENSMUST00000220721.1	ENSMUSG00000113679.1	0.854323	0.945101	0.804318	0.865912	0.675977	0.605789	0.567496	0.466805	1.11394	0.904556	1.03164	0.697672
LNC_001585	XLOC_032531	0.293477	0.015077	0.506495	0	0	0.017099	0	0.001246	0	0	0	0
LNC_000272	XLOC_005007	0.370069	0.361105	0.19842	0.433064	0.156283	0.232761	0.217115	0.171378	0.183531	0.398537	0.356697	0.306816
ENSMUST00000139701.1	ENSMUSG00000054556.6	0.525055	0.586305	0.429862	0.407967	0.619457	0.418172	0.344209	0.744362	0.414007	0.588057	0.357392	0.417193
LNC_001788	XLOC_037393	0.504467	0.586211	0.664976	0.540232	0.597278	0.28799	0.453632	0.229513	0.342375	0.881736	0.647635	0.43839
LNC_004313	XLOC_089494	0	0	0.145277	0	0.074685	0.133079	0	0.111416	0.306643	0.20041	0.040008	0.070956
LNC_003355	XLOC_069171	0	0.11955	0.033055	0.001463	0	0.05299	0.431698	0.04901	0	0.01289	0.0105	0
LNC_000782	XLOC_016524	0	0	0	0	0	0	0	0	0	0	0.488142	0
LNC_000957	XLOC_019944	3.09931	3.03934	3.29383	2.57842	2.75343	2.68059	1.79146	2.29961	2.63114	3.93273	3.54472	4.20137
ENSMUST00000159119.7	ENSMUSG00000053332.13	7.28873	0.092729	0.011384	0	5.71006	4.43435	0	0	0.175603	0	4.28512	2.54442
ENSMUST00000155674.1	ENSMUSG00000087445.1	0.191485	0.458931	0.524033	1.09398	0.41999	0.482372	0.600255	0.258372	0.345371	0.568665	0.121264	0.102236
ENSMUST00000209906.2	ENSMUSG00000109844.2	0.058595	0.330541	0.533994	0.618928	0.720001	0.452302	0.625047	0.394606	0.443156	0.420233	0.737684	0.503001
LNC_004146	XLOC_085732	0.428491	0.351178	0.411535	0.443248	0.356409	0.266295	0.386481	0.377389	0.575597	0.775635	0.765693	0.622931
ENSMUST00000186444.1	ENSMUSG00000100594.1	1.01737	0.829267	1.1598	1.04314	0.787147	0.865673	1.04586	0.887639	1.16991	1.02704	1.23654	1.04947
ENSMUST00000148466.1	ENSMUSG00000056735.5	0.921485	1.57082	1.66773	1.0923	1.45546	1.57944	1.66182	1.20131	1.68626	1.67704	2.00952	1.61994
ENSMUST00000142835.1	ENSMUSG00000085093.1	0.538692	0.358035	0.189088	0.517551	0.219194	0.3175	0.503242	0.473869	0.32389	0.364855	0.460769	0.364821
LNC_006243	XLOC_129187	0.325872	0	0	0.129249	0	0	0	0	0	0	0	0
LNC_005201	XLOC_106888	0	0	0	0	0.133893	0.35839	0	0	0	0	0	0
LNC_005459	XLOC_112475	1.41783	1.50883	1.17307	1.38652	0.830837	0.83915	0.857548	0.853751	1.50985	0.758095	0.702288	1.43534
LNC_001888	XLOC_039771	0.423891	0.144083	0.12029	0.21547	0.05393	0.082642	0.149378	0.071733	0.150526	0.178346	0.189291	0.310369
LNC_003752	XLOC_077249	0	0.069387	0	0	0.315091	0	0	0	0	0.131581	0	0.054528
ENSMUST00000180690.1	ENSMUSG00000096917.2	0.090582	0.303426	0.294026	0.158769	0.40268	0.311278	0.161394	0.255477	0.464389	0.178828	0.260361	0.363184
LNC_001987	XLOC_042284	0	0.077566	0.117372	0	0.350811	0	0	0.289041	0.13213	0	0	0.153128
LNC_002908	XLOC_060764	0	0.016824	0	0	0.234271	0.213664	0	0.044236	0.054398	0	0.788808	0.39966
LNC_004486	XLOC_092393	0.520798	0	0	0	0.071922	0	0	0	0.067949	0	0	0
LNC_005374	XLOC_110419	0.368519	0.271435	0.364821	0.299994	0.162464	0.294413	0.252933	0.141683	0.342047	0.189807	0.46475	0.163603
ENSMUST00000177043.1	ENSMUSG00000093629.1	0.530973	1.59529	1.01015	1.35834	1.43771	0.616378	0.979333	1.22779	0.944835	0.767843	0.458305	1.10083
ENSMUST00000194907.1	ENSMUSG00000102796.1	0.726654	3.71158	2.28475	2.18736	2.72082	2.65335	2.91678	2.50974	2.4915	2.0983	2.58143	2.49446
ENSMUST00000229702.1	ENSMUSG00000116097.1	0.282863	0	0.701381	0	0.205936	0.413422	0.301521	0.373238	0	0.29756	0.188319	0.110133
LNC_003147	XLOC_065172	0	0	0.391241	0	0	0	0	0	0	0	0	0
LNC_000191	XLOC_003761	0.106445	0.224473	0.10475	0	0.101524	0.167331	0	0	0	0.336301	0	0.222316
LNC_004430	XLOC_091585	0	0	0.054883	0.155062	0	0	0	0	0	0	0	0.323825
ENSMUST00000132267.1	ENSMUSG00000086401.1	0.294291	0.622166	0.653694	0.519723	0.523953	0.313711	0.324099	0.444871	0.41974	0.492327	0.377225	0.375924
LNC_000158	XLOC_003140	0	0	0	0	0.308103	0	0	0	0	0.071584	0	0
LNC_004408	XLOC_091366	0	0	0.052748	0	0	0.313398	0.046428	0	0	0	0.079927	0
ENSMUST00000152784.7	ENSMUSG00000085175.7	0.958158	0.41762	0.483478	0.634216	0.663185	0.698269	0.75505	0.496433	0.706972	0.604145	0.635078	0.89557
LNC_004593	XLOC_094871	1.32841	0	0	0.428908	0	0.491921	0	0.422645	0.362596	0.439288	0.198407	0
LNC_002117	XLOC_045752	0.751596	0.895567	1.35907	1.37184	0.64739	0.704666	0.687035	0.854399	1.39614	1.3185	1.06339	1.25977
ENSMUST00000196072.1	ENSMUSG00000105929.1	0.237847	0.188169	0.243082	0.314226	0.373325	0.063469	0.470504	0.212873	0.459973	0.290786	0.246929	0.250556
LNC_005319	XLOC_109232	0.462778	0.317802	0.096615	0.319091	0.129513	0.088502	0.121026	0.179908	0.414247	0.382143	0.294341	0.174818
LNC_004994	XLOC_102486	0.164413	0.279349	0.000126	0.150837	0.315174	0.399339	0.183403	0.241576	0.561918	0.086224	0.248101	0.213694
ENSMUST00000144705.7	ENSMUSG00000086290.8	1.31026	1.1838	2.73748	1.53884	1.51121	1.92537	1.52745	1.30435	1.76958	1.75471	3.04726	1.75895
LNC_004797	XLOC_098737	0.123928	0.250968	0.099285	0.101625	0.083716	0.105562	0	0.188603	0.10618	0.392869	0	0.145417
ENSMUST00000175921.3	ENSMUSG00000093460.9	0.597575	0	0.045905	0	0.034187	0.101658	0.13716	0.120681	0.108771	0.105678	0.092578	0.025913
ENSMUST00000131129.1	ENSMUSG00000059277.12	0	0.082411	0.82442	0.051812	0.442469	0.111189	0.0803	0.444487	0.263787	0.651613	0.714975	0.511783
LNC_001818	XLOC_038040	0	0.307614	0.385168	0.355552	0.319015	0.182337	0.326233	0.135693	0.494941	0.548852	0.319826	0.459481
LNC_002222	XLOC_047496	1.2427	0	0.861409	0.059547	0.898408	0.558973	0.72095	0.881409	0.977132	1.67992	0.463526	0.931052
ENSMUST00000169975.1	ENSMUSG00000090459.1	0.757834	0	0	0	0.090619	0	0	0	0	0	0	0
LNC_002817	XLOC_059129	0	0	0	0	0	0	0	0.320402	0	0	0	0
LNC_004526	XLOC_093269	0.691625	0.231807	0.273973	0.565668	0.569375	0.295794	0.410001	0.508741	0.478973	0.508259	0.489274	0.299834
LNC_004517	XLOC_093102	0.496516	0.327919	0	0.213766	0.362859	0.29363	0.46313	0.315806	0.222671	0.33971	0.130987	0.068534
LNC_001108	XLOC_022825	0.39161	0	0	0	0.046677	0	0	0	0	0	0	0
LNC_005550	XLOC_114063	0.434859	0	0	0.004065	0.007716	0	0	0	0	0	0	0
LNC_004205	XLOC_086730	1.02859	0.803522	0.761116	0.628392	0.815513	0.657687	0.754676	0.499102	0.815774	1.14144	0.849469	1.02566
ENSMUST00000180908.8	ENSMUSG00000097360.8	0.78152	0.863939	0.443183	0.604463	0.947787	0.810981	1.08881	0.80833	0.704217	1.02393	0.941032	1.02869
LNC_001536	XLOC_031484	0	0.042805	0.047919	0	0.102109	0.04804	0.11412	0	0	0.284298	0.599425	0.211487
LNC_001301	XLOC_025770	2.97022	4.10209	2.98248	4.51864	3.5143	2.38276	0.066075	2.47572	3.63402	4.29487	2.86253	5.01244
LNC_003272	XLOC_067256	0.375332	0.556435	0.54609	0.38304	0.253374	0.506526	0.370833	0.3293	0.369674	0.435736	0.418008	0.466797
ENSMUST00000141265.7	ENSMUSG00000084925.8	0.214377	0.490113	0.361215	0.559338	0.369601	0.412315	0.290593	0.391258	0.317089	0.402534	0.366345	0.653864
LNC_000671	XLOC_014627	1.53067	1.39603	1.66559	1.1899	1.59634	1.11674	1.47347	1.32379	1.67308	2.32219	2.15571	2.37236
LNC_005866	XLOC_121416	0.382829	0	0	0.056098	0.159108	0.100409	0	0	0.092546	0.096911	0.148044	0.053896
ENSMUST00000146366.2	ENSMUSG00000086108.2	0.788289	0.485319	0.536545	0.556553	0.493259	0.589603	0.649824	0.539813	0.370844	0.514243	0.579944	0.753375
LNC_003135	XLOC_064982	0.658373	0.110718	0.387195	0.39101	0.352795	0.336011	0	0.71839	0.26455	0.260257	0.592479	0.781877
LNC_005376	XLOC_110442	0.67022	0.819173	0.826474	0.904102	0.68014	0.732371	0.427193	0.612783	0.917509	1.04704	1.18419	0.955423
ENSMUST00000196191.1	ENSMUSG00000105530.1	1.80399	0.973221	0.699817	0.73858	0.6197	0.884784	0.56768	0.880002	0.607028	0.949503	0.626867	0.792409
LNC_005229	XLOC_107474	0.087657	0.161606	0.119784	0.163334	0	0.148713	0.013136	0.119792	0.096936	0.740662	0.172933	0.088224
LNC_005651	XLOC_116241	3.28595	2.0564	1.55151	2.7697	0.95641	1.22466	2.17381	1.76659	2.20167	2.6094	2.78999	2.36452
LNC_002057	XLOC_043619	0	0	0.139445	0	0.277033	0	0.222635	0	0	0	0.341924	0
LNC_002206	XLOC_047249	0.40362	0	0	0	0.333706	0	0	0.139863	0	0.206073	0.409486	0.211403
ENSMUST00000227393.1	ENSMUSG00000115568.1	0.45877	0.65126	0.543258	1.16053	0.568927	0.467431	0.417568	0.561261	0.499415	0.572856	0.713227	0.497089
ENSMUST00000208795.1	ENSMUSG00000109399.1	0.09123	0.423309	0.330553	0.799202	0.199101	0.896098	0.127235	0.429332	0.53574	0.382647	0.845421	0.921836
LNC_004839	XLOC_099721	0.57075	0.58926	0.301499	0.402366	0.53494	0.268164	0.378818	0.192806	0.567715	0.349601	0.355278	0.281816
LNC_004611	XLOC_095020	0.434278	0.548917	0.491891	0.441008	0.495697	0.33773	0.431567	0.407009	0.649499	0.639253	1.0624	0.462939
LNC_005347	XLOC_109847	0.19777	0	0	0.008877	0	0	0	0.415271	0	0	0.001497	0.007731
LNC_005369	XLOC_110234	0	0	0	0	0	0	0	0	0.040578	0.087579	0.36341	0
ENSMUST00000210028.1	ENSMUSG00000109652.1	0.196598	0.32321	0.211397	0.545456	0.147474	0.16689	0.333092	0.300178	0.404789	0.28177	0.301885	0.202758
LNC_006713	XLOC_139687	0	0	0.419484	0	0	0	0	0	0	0.171508	0.078766	0.165006
LNC_005597	XLOC_115241	2.17993	1.6962	2.03592	1.81022	1.31335	1.4527	1.34244	1.37283	2.24983	2.49966	2.29893	2.22118
LNC_000623	XLOC_013330	0.385407	0.150341	0.096514	0.583321	0.09882	0.064076	0.137019	0.356701	0.183538	0.150067	0.217165	0.295397
LNC_002015	XLOC_042864	0	0	0	0	0	0	0.151528	0	0.414671	0.085701	0	0.451679
ENSMUST00000191302.1	ENSMUSG00000108621.1	0.347923	0.100789	0.57133	0.745265	0.166725	0.298602	0.380148	0.257736	0.171218	0.160763	0.325752	0.282288
LNC_003498	XLOC_071912	0	0.185855	0.50897	0.375023	0.221053	0.256341	0.159562	0.183462	0.084137	0.327274	0.523789	0
LNC_005686	XLOC_117135	0.815036	0.193722	0.536106	0.611048	0.70433	0.208974	0.450885	0.589491	0.108524	0.505107	0.605025	1.16957
ENSMUST00000124394.2	ENSMUSG00000099061.1	4.06737	0.963998	1.94186	0.515342	1.63345	1.16498	1.09753	1.75589	1.4903	2.05545	1.45991	1.63811
LNC_006407	XLOC_132901	0	0	0	0	0	0	0.355686	0	0	0	0	0
LNC_005380	XLOC_110505	0.165751	0.101081	0.411444	0.150613	0.394955	0.260777	0.119022	0.153097	0.883052	0.506092	0.295237	0.276011
LNC_003653	XLOC_075262	0.419022	0.133296	0.363121	0.192201	0.092511	0.114932	0.241941	0.187882	0.634153	0.685079	0.383257	0.354432
LNC_006400	XLOC_132750	0.087631	0.489774	0.172187	0.087871	0.0566	0	0	0.052068	0	0.249779	0.02173	0.186018
LNC_006306	XLOC_130892	0	0	0	0.233989	0	0.058434	0.094908	0.072756	0.052572	0.064451	0.241091	0.316653
LNC_001362	XLOC_028037	0	0	0	0	0.084533	0	0	0.456627	0	0.049495	0	0
LNC_001542	XLOC_031589	0	0	0.430714	0.203524	0	0.160842	0.421417	0.203733	0	0.209208	0.525002	0.662784
LNC_003205	XLOC_066336	0	0	0.158015	0.147677	0.483595	0	0.279613	0	0	0	0	0.122468
LNC_006717	XLOC_139698	0	0	0	0	0	0	0	0	0.140576	0	0.0803	0.335881
LNC_003375	XLOC_069573	0	0	0	0	0	0.470096	0	0	0	0	0	0
LNC_002590	XLOC_055054	0	0	0.004971	0.003522	0	0	0.003448	0	0	0	0	1.23335
ENSMUST00000227042.1	ENSMUSG00000115813.1	0.722526	0.194994	0.293759	0.281469	0.201685	0.441672	0.254045	0.358286	0.296417	0.169853	0.320002	0.436107
LNC_002095	XLOC_044720	0	0.200361	0	0	0	0	0	0	0	0	0.346635	0
LNC_000530	XLOC_011105	0	0	0.387329	0	0	0	0	0	0	0	0	0
ENSMUST00000137010.1	ENSMUSG00000060808.4	0.411546	0.756265	0.635139	0.674112	0.332239	0.922479	0.452792	0.536322	0.678309	0.935896	0.509145	0.597299
LNC_004264	XLOC_087906	0.076987	0.34606	0.171697	0.196936	0.453381	0.115263	0.21821	0	0.120661	0.198874	0	0.188152
LNC_001381	XLOC_028397	0.067108	0.408027	0	0.089395	0	0.185655	0	0	0.104045	0	0	0.249477
LNC_003656	XLOC_075270	0.280561	0.383801	0.333096	0.43871	0.314098	0.351598	0.174532	0.385426	0.56694	0.570956	0.489597	0.413097
ENSMUST00000186431.6	ENSMUSG00000072761.10	2.21307	2.99166	2.16162	2.0472	2.30228	2.24663	2.62902	3.27883	2.97516	2.90665	2.23286	3.01588
LNC_003302	XLOC_068221	0.29649	0.301476	0	0	0.144032	0	0	0	0.397821	0.306411	0.150305	0.157963
LNC_001149	XLOC_023345	4.3698	3.8868	3.45571	1.6902	2.88598	2.25938	2.08783	2.23014	3.21297	3.12675	3.58469	3.09732
LNC_003783	XLOC_077634	0.06394	0	0.063025	0.101495	0.047376	0.249208	0	0.024988	0.287115	0.129288	0.124727	0.06666
LNC_003909	XLOC_080011	2.62944	1.80322	2.00264	1.13729	0.256414	0.311408	3.24565	2.80439	1.18132	0.43269	1.22715	3.01418
LNC_000699	XLOC_015112	0	0	0	0	0	0	0	0	0	0.395674	0	0
LNC_002425	XLOC_051530	0	0.47769	0.352688	0	0.120987	0.173942	0.320569	0.149185	0.534752	0.621029	0.088761	0.125307
LNC_004395	XLOC_091187	1.34428	0.148584	0.200078	0	0.213488	0.274917	0.07634	0.661656	0.295619	0.493577	0.140881	0.599281
LNC_001092	XLOC_022682	0.314825	0.152699	0.079812	0.257077	0	0	0.079982	0	0	0.165775	0	0.106478
LNC_006592	XLOC_136907	0.312705	0	0	0	0	0	0.074884	0	0	0	0.289449	0
LNC_003412	XLOC_070170	0.15799	0.497917	0.534063	0.491863	0.44006	0.406032	0.40726	0.410191	0.533128	0.362753	0.553844	0.592555
LNC_001173	XLOC_023654	0.034463	0.217721	0.078025	0.000248	0.514226	0.111135	0.157703	0.102728	0.192305	0.260121	0	0.158461
ENSMUST00000221673.1	ENSMUSG00000113698.1	0.862256	1.1021	0.582952	1.11297	0.684593	1.07759	0.904914	1.0967	0.744723	1.09535	0.722242	1.01247
LNC_004731	XLOC_097055	0.030457	0.016742	0	0.061444	0.043636	0.031703	0	0	0.047367	0.554541	0.040871	0.035648
ENSMUST00000188193.1	ENSMUSG00000100812.1	0.914301	0.800635	0.96647	0.3831	0.865991	0.921344	0.452954	0.687283	0.525457	0.914471	0.827072	1.03823
LNC_002725	XLOC_057563	0.682481	1.23211	0.89124	1.29779	0.663975	0.667292	0.996484	1.07695	1.37372	1.64935	1.24495	1.41855
LNC_002974	XLOC_061910	0.513998	0.366176	0.423284	0.556118	0.293561	0.234961	0.185427	0.257112	0.42935	0.513643	0.371701	0.559614
LNC_004717	XLOC_096859	0	0	0	0	0.448006	0.146585	0	0	0	0.122356	0.536401	0
ENSMUST00000218733.1	ENSMUSG00000111950.1	1.03974	0.443698	0.399163	0.334592	0.425028	0.470908	0.596251	0.498617	0.466443	0.557655	0.364126	0.354132
ENSMUST00000229610.1	ENSMUSG00000097915.2	0.578047	1.04127	1.10952	0	0.804057	1.22292	1.76345	0.04522	0.015115	0.844283	0.908979	0
LNC_000217	XLOC_004124	0	0	0	0	0	0	0	0	0	2.05417	0	0
LNC_006612	XLOC_137529	0	0.405554	0	0	0.381417	0	0	0.028543	0	0.166259	0	0
LNC_000519	XLOC_010896	0	0	0	0	0	0	0.40899	0	0	0	0	0.026919
LNC_006468	XLOC_134358	0.427734	0	0.408326	0.079307	0	0.2476	0	0.174673	0	0	0.254539	0
LNC_005312	XLOC_109155	0	0	0.146353	0	0	0	0	0	0.356439	0	0	0
LNC_002687	XLOC_056793	0.319881	0.250772	0.059397	0.068914	0.565466	0.357444	0.25549	0.147466	0.2161	0.30558	0.150283	0.325249
ENSMUST00000181575.2	ENSMUSG00000097251.2	1.34754	1.72272	1.50153	1.1605	1.39097	1.27618	0.988853	1.30596	1.39854	1.46144	1.45962	1.2061
LNC_006037	XLOC_125356	0	0	0	0	0	0	0.08861	0.302809	0	0	0	0
LNC_003978	XLOC_081960	0.506126	0.516959	0.31359	0.452226	0.305532	0.422501	0.282317	0.289422	0.477026	0.463945	0.428023	0.644571
LNC_004996	XLOC_102522	0.297671	0.336957	0.379956	0.239846	0.253519	0	0.481067	0.282586	0	0.439526	0	0.106331
LNC_004399	XLOC_091239	0.122001	0.57566	0.16653	0.199245	0.37313	0	0.129398	0.213547	0	0.208999	0.537495	0.191424
LNC_000738	XLOC_015741	0.228168	0	0.066079	0	0.154052	0	0	0	0.325073	0	0	0.407218
LNC_005869	XLOC_121453	0.131692	0.326968	0	0.084617	0.073013	0.225414	0	0.270703	0.206607	0.286419	0	0.243885
LNC_000521	XLOC_010928	0	0	0	0	0.354319	0	0	0.045952	0	0	0.089552	0
LNC_002898	XLOC_060458	0	0	0	0	0	0	0	0	0	0.3402	0	0
LNC_003275	XLOC_067377	0	0.101179	0.336343	0	0.19133	0.069011	0	0.315382	0	0	0.125944	0.233728
ENSMUST00000074702.9	ENSMUSG00000063087.14	1.24395	0.995625	1.06829	1.00272	0.589188	0.468077	0.782619	0.848582	0.866074	0.774154	0.655914	0.746156
LNC_004252	XLOC_087660	0.398029	0	0	0	0	0	0	0	0	0	0	0
LNC_003983	XLOC_082003	0.114478	0	0.043342	0.206563	0	0.078204	0.083925	0.152077	0	0	0.114502	0.359806
ENSMUST00000224991.1	ENSMUSG00000114883.1	0.338553	0.070725	0.649641	0.171099	0.043041	0.188426	0.143477	0.161464	0	0.176776	0.033604	0
ENSMUST00000181947.7	ENSMUSG00000096929.7	2.2496	1.97554	1.39632	1.8799	1.58691	1.61816	1.81859	1.78829	1.53058	1.87904	1.78657	1.97491
LNC_001614	XLOC_033384	13.5256	26.5379	14.0483	23.7949	15.9029	13.4951	11.9778	13.2418	14.5492	18.8231	14.0527	16.3506
LNC_000980	XLOC_020240	0.468731	0.304392	0.31195	0.038583	0.215396	0.291763	0.13215	0.341442	0.320054	0.35381	0.306799	0.269276
LNC_002066	XLOC_044026	0	0	0	0	0.182553	0	0	0	0	0	0.476668	0.515802
LNC_002774	XLOC_058428	0.016786	1.0029	0.004605	0.001846	0.222338	0.004226	1.40445	0.344873	0.518231	0.578739	0	0.985785
LNC_003772	XLOC_077485	0.406644	0.310345	0.474819	0.589591	0.409074	0.197007	0.231491	0.212769	0.346463	0.695793	0.454303	0.46637
LNC_000082	XLOC_001386	0.371783	0.267013	0.471849	0	0.199323	0.275895	0	0.235324	0.420742	0.324332	0.3882	0
LNC_002088	XLOC_044624	0.05089	0.429267	0	0	0	0.177351	0	0	0	0	0	0
ENSMUST00000188574.1	ENSMUSG00000101651.1	0.663024	0.696739	0.709426	0.651959	0.641193	0	1.23503	0.650835	1.3055	0.349571	0.941171	0.587196
LNC_001029	XLOC_020837	0.478445	0.374936	0.986599	1.169	0.638057	0.650284	0.481778	0.510824	0.713306	1.33882	1.41907	0.780184
LNC_001395	XLOC_028727	0.202574	0.09078	0.095197	0.215235	0.105297	0.088723	0	0.214805	0.175533	0.077133	0.368834	0.429511
ENSMUST00000139014.1	ENSMUSG00000043993.6	2.3333	1.66861	1.63378	1.46505	1.19832	1.70775	1.23471	1.77239	1.39621	2.09264	1.51276	1.57663
LNC_004076	XLOC_083838	0	0	0.376337	0	0	0	0	0	0	0	0.117774	0
ENSMUST00000099331.3	ENSMUSG00000074782.3	0.184159	0.603888	0.443267	0.394511	0.506189	0.399762	0.45772	0.714247	0.330835	0.442972	0.374551	0.407004
LNC_003450	XLOC_070842	0	0.050937	0.051385	0.338811	0.138226	0	0.10299	0.061377	0.303692	0.101581	0	0
LNC_005734	XLOC_118065	0.149796	0.105297	0.212448	0.243188	0.390354	0.120172	0.106451	0.131722	0.317035	0.157579	0.20278	0.52195
ENSMUST00000137251.2	ENSMUSG00000084946.2	0.888255	7.01116	9.27665	6.92033	8.22125	8.15365	9.49241	7.87441	7.02078	8.36338	8.60879	8.77451
LNC_001214	XLOC_024041	0	0	0.150927	0	0.073816	0.226234	0.132549	0.408792	0.249294	0.314071	0	0.381574
LNC_003056	XLOC_063659	0.683947	0.336836	0.325924	0.432676	0.584556	0.500228	0.441333	0.485813	0.555648	0.348731	0.581472	0.402391
LNC_000720	XLOC_015483	2.41577	1.80472	2.12316	1.59674	1.85071	1.88065	1.40251	1.83209	2.63909	2.40528	2.75514	2.66093
ENSMUST00000209605.1	ENSMUSG00000109810.1	0.890446	1.19477	0.768839	0.497408	0.858563	1.19409	1.11788	0.723257	0.633881	0.935752	0.8539	0.849086
LNC_005820	XLOC_120306	0	0.170864	0.237303	0.121583	0.142011	0	0.198395	0	0.246933	0.156806	0.37074	0.077303
LNC_002672	XLOC_056421	0.547662	0	0.426875	0.134877	0.463321	0.324449	0	0.104317	0.173465	0.055692	0.0833	0.230512
ENSMUST00000180805.1	ENSMUSG00000097165.1	1.46251	2.28242	2.35217	1.83493	1.54132	2.50572	1.59448	2.30062	2.16528	2.30628	1.69093	1.52397
ENSMUST00000209071.1	ENSMUSG00000109097.1	0.775936	0.073021	0.384327	0.349737	0.142316	0.247524	0.102575	0.125223	0.102608	0.272299	0.266163	0.190078
ENSMUST00000155816.7	ENSMUSG00000085241.7	3.14253	1.57177	4.82798	1.15481	4.36558	3.43804	3.24939	2.07518	1.65745	1.41602	2.21271	2.04435
LNC_002981	XLOC_062296	1.26828	0.46787	0.516241	0.888192	0.579748	0.967072	0.822874	0.798011	0.847672	0.838901	0.723903	0.655773
LNC_002410	XLOC_051307	0	0	0.493942	0	0	0	0.103844	0.116762	0.220333	0	0	0.121434
LNC_000603	XLOC_012660	0.148081	0.471347	0.412068	0.372997	0.454262	0.167259	0.365169	0.245684	0.37397	0.197191	0.219646	0.140341
LNC_001394	XLOC_028695	0.28088	0.071479	0.19974	0	0	0.063382	0.072021	0	0.243524	0.28557	0	0.103057
LNC_000606	XLOC_012728	0.611906	0.26789	0.79182	0.467812	0.601009	0.477088	0.155541	0.241989	0.327485	0.59654	0.584828	0.344673
LNC_006683	XLOC_138930	3.23424	1.42974	2.25119	2.17906	1.44871	1.67785	1.43237	1.29002	2.48651	2.95852	3.09011	3.35488
ENSMUST00000183043.7	ENSMUSG00000097023.8	0.76	1.79617	1.70369	1.79881	0.97223	2.27089	0.421138	2.33735	1.04834	1.28645	1.76733	1.32742
LNC_005350	XLOC_109892	0.627654	0.375032	0.57852	0.505518	0.373216	0.494359	0.554639	0.478594	0.530583	0.87839	0.59063	0.663611
ENSMUST00000160925.7	ENSMUSG00000063087.14	0.439979	0.199052	0.252133	0.5984	0.206482	0.202918	0.2316	0.147856	0.303624	0.295103	0.24814	0.387142
LNC_005448	XLOC_112278	0.632116	0.365996	0.466664	0.405852	0.427227	0.310544	0.45988	0.413884	0.59475	0.754747	0.779387	0.530495
LNC_000924	XLOC_019491	2.87036	3.63774	3.43611	5.02046	3.34714	2.64916	2.88731	2.75904	4.63828	4.97373	4.69193	4.71409
LNC_000538	XLOC_011433	0	0	0.04526	0	0	0	0.020934	0.57579	0	0.11375	0	0
ENSMUST00000197472.1	ENSMUSG00000104704.1	0.23322	0.784822	0.44181	0.69304	0.333656	0.580097	0.327289	0.303018	0.463091	0.81964	0.358702	0.098197
ENSMUST00000181893.7	ENSMUSG00000097466.8	0.451396	0.465261	0.421196	0.485224	0.044809	0.470054	0.857775	0.517154	0.552961	1.0016	0.238211	0.184643
LNC_001367	XLOC_028079	0	0	0.144341	0	0.295266	0.127696	0.133099	0.065685	0	0	0.080682	0
LNC_002110	XLOC_045429	0.277521	1.40239	0.933227	0.986279	0.995703	1.0684	1.17165	1.38323	1.08043	1.431	1.32917	1.04314
LNC_006653	XLOC_138244	0.119734	0	0.102663	0.446104	0	0	0	0	0.079727	0.16568	0	0.142864
ENSMUST00000093873.8	ENSMUSG00000070315.12	0.550032	0.250517	0.491425	0.18342	0.208355	0.324116	0.29365	0.317331	0.278593	0.234307	0.274615	0.398361
LNC_001894	XLOC_039882	0	0.446363	0	0.15476	0	0.1403	0	0	0	0	0	0
LNC_001919	XLOC_040302	0.430929	0.460354	0.338566	0.942379	0.396086	0.263852	0.234965	0.44313	0.612332	0.917536	0.647484	0.838741
LNC_004985	XLOC_102322	0	0	0	0	0	0	0	0	0	0.360581	0	0
ENSMUST00000208702.1	ENSMUSG00000108903.1	0	0	0	0.103444	0	0.060954	0	0.04182	0	0	0	0
LNC_004407	XLOC_091322	0.586932	0.499287	0.283982	0.714872	0.486105	0.299269	0.410624	0.351445	0.526805	0.437856	0.69781	0.506867
ENSMUST00000203175.1	ENSMUSG00000107734.1	0.138636	0.197073	0.415986	0.600741	0.285926	0.488192	0.918898	0.445547	0.368943	0.362485	0.663897	0.228895
LNC_002401	XLOC_051210	0.086294	0.045494	0.078423	0.328522	0.20576	0.059168	0.045993	0.075966	0.153962	0	0.070485	0.107415
ENSMUST00000123117.1	ENSMUSG00000095334.2	34.9632	7.73513	10.4552	7.42907	8.87334	12.6983	17.5392	13.3833	14.4888	15.4777	17.9357	16.9515
LNC_004316	XLOC_089510	0.784082	1.07028	1.07636	1.04609	0.934124	1.04551	0.714861	0.814547	0.835778	0.813712	0.760518	0.865698
LNC_006804	XLOC_141437	0.845548	0.784585	0.915064	1.4105	0.935861	0.955444	0.606833	0.896691	0.98748	1.36145	1.90873	1.52739
LNC_002406	XLOC_051275	0.071043	0.373499	0.152709	0.120165	0.008234	0.11154	0.029623	0.173022	0.101809	0.113178	0	0.077408
ENSMUST00000209571.1	ENSMUSG00000086804.8	0.210537	0.092955	0.135794	0.224598	0.157884	0.197443	0.383903	0.373324	0.611151	0.389941	0.351729	0.367032
LNC_002724	XLOC_057563	0.921665	1.37875	1.66957	1.4527	1.37528	1.1783	0.859019	0.679315	1.31157	1.71063	1.94847	1.9084
ENSMUST00000145042.1	ENSMUSG00000106951.1	0.300544	0.164959	0.473827	0.264638	0.122744	0.31266	0.419407	0.475962	0.717996	0.441495	0.593086	0.474587
LNC_000046	XLOC_000862	0.164305	0.212501	0.230748	0.078092	0.210353	0.566488	0	0.249168	0.143521	0.170216	0.22554	0.427798
ENSMUST00000134206.1	ENSMUSG00000086385.1	0	0.161371	0.1082	0.497825	0	0.204406	0.036989	0.256368	0.230785	0.087756	0.236951	0.021621
LNC_003342	XLOC_068707	0.224603	0.248823	0.163111	0.245046	0.318616	0.280709	0.275638	0.165362	0.359312	0.523042	0.519921	0.413024
ENSMUST00000213429.1	ENSMUSG00000095385.3	0.086194	0.453507	0.497839	0.35254	0.656024	0.624846	0.484507	0.415557	0.189649	0.453863	0	0.94608
ENSMUST00000207273.1	ENSMUSG00000109408.1	0.519458	0.534789	0.401256	0.474248	0.817499	0.646272	0.600322	0.337921	0.491558	0.551847	0.479439	0.799113
LNC_001929	XLOC_040654	0.447018	0.266774	0.321788	0.237347	0.265427	0.216159	0.191103	0.230529	0.388248	0.525497	0.433885	0.445905
LNC_002193	XLOC_047125	0.350953	0.261137	0.093638	0.124766	0	0.064133	0	0	0.189741	0.072923	0	0.080989
ENSMUST00000152249.1	ENSMUSG00000085230.1	0	0.371171	0.654446	0	0.094017	0.201666	0	0	0.325578	0	0	0
LNC_000296	XLOC_005895	0.008359	0.00091	0.007433	0.71929	0	0.095201	0.001408	0.030628	0.32655	0.000881	0	0.119562
ENSMUST00000143651.7	ENSMUSG00000087177.7	1.01647	1.43455	1.49698	1.26797	1.37725	0.915554	0.608659	1.35591	1.64066	1.54744	1.38615	1.43511
ENSMUST00000181180.1	ENSMUSG00000097796.1	2.38069	1.8227	3.01747	1.67126	3.35508	3.11191	2.60355	2.45824	1.2943	2.79359	2.67296	2.18495
LNC_005251	XLOC_108022	0	0.047653	0	0	0.128739	0	0	0	0	0.085689	0	0.472422
ENSMUST00000185820.6	ENSMUSG00000029386.15	4.07791	5.30565	4.89773	5.34014	4.89399	4.96152	5.29397	5.15849	4.93584	4.85236	4.22492	4.46183
ENSMUST00000219677.1	ENSMUSG00000112248.1	0.169036	0.427984	0.500293	0.733628	0.269254	0.352796	0.415029	0.30299	0.259688	0.399119	0.254055	0.434969
LNC_000115	XLOC_001985	3.09836	1.53301	1.54072	2.16196	1.28943	1.27184	1.26314	1.16516	2.07757	1.98528	2.2432	2.35812
LNC_001428	XLOC_029781	0.06948	0	0	0	0	0	0	0.095523	0	0.473262	0	0
ENSMUST00000181090.7	ENSMUSG00000097616.7	0.199917	0.29167	0.39669	0.159477	0.588863	0.456952	0.334809	0.656848	0.177019	0.770167	0.304774	0.430763
ENSMUST00000204020.1	ENSMUSG00000107585.1	0.425592	1.17883	1.76774	2.48644	0.890231	1.37756	1.83372	1.3842	2.02426	2.45816	2.09883	2.76414
LNC_003887	XLOC_079460	0.212587	0.099903	0.239748	0.003581	0.146462	0.099629	0	0.492324	0.15837	0.39949	0.15623	0.090678
ENSMUST00000221358.1	ENSMUSG00000113328.1	1.18683	1.34261	1.05676	1.19295	0.775963	1.10104	1.08596	0.917729	1.21481	1.35811	0.999496	1.09506
LNC_002043	XLOC_043266	0	0	0	0	0	0	0.285743	0	0.214526	0.472684	0.330299	0.334271
LNC_002056	XLOC_043612	3.85835	5.55203	5.93888	8.2625	6.42756	5.78188	5.19098	5.75317	7.14525	7.87323	8.60636	8.12951
LNC_002867	XLOC_059836	0	0	0	1.64526	0.537929	1.15215	0.732038	0	1.00472	0.80261	0.77163	1.62075
LNC_001715	XLOC_035500	0.123423	0.196971	0	0.203126	0.064915	0	0	0.039666	0.367562	0.143835	0.01602	0.011191
LNC_005294	XLOC_108795	0.468958	0.246548	0.526594	0.227199	0.345023	0.253611	0.389458	0.257666	0.420219	0.489107	0.950107	0.218371
LNC_003639	XLOC_074842	0	0.553648	0	0.266787	0	0	0	0	0	0	0	0.07679
ENSMUST00000227460.1	ENSMUSG00000115406.1	0.01911	0.611806	0.400439	0.07185	0.581285	0.481763	0.374541	0.346492	0.302621	0.253776	0.392425	0.354608
LNC_006679	XLOC_138889	0.193523	0.834537	0.447943	0.66204	0.336454	0.504569	0.415164	0.459418	0.318445	0.44927	0.483574	0.528054
ENSMUST00000195141.1	ENSMUSG00000103914.1	0.091125	1.24747	0.3011	0.380667	0.651727	0.529644	0.345539	0.741573	0.416495	0.607999	0.232445	0.317587
ENSMUST00000202437.1	ENSMUSG00000107120.1	0.183427	0.450029	0.278904	0.34405	0.237914	0.364408	0.361952	0.232316	0.264994	0.530754	0.231645	0.54285
LNC_002901	XLOC_060563	0.082225	0.064576	0	0.10732	0.076203	0	0	0.187209	0.445722	0	0	0.145777
LNC_003778	XLOC_077564	0	0	0	0.404467	0.120346	0	0	0	0.196469	0.108675	0	0
ENSMUST00000194925.1	ENSMUSG00000103839.1	0.871162	1.01005	0.667327	1.08274	0.633082	0.757344	0.616919	0.723346	0.855543	0.833421	0.820803	0.839501
LNC_005286	XLOC_108687	0.059822	0.047728	0.089297	0	0	0.058095	0.095652	0.315974	0.080849	0	0	0.057761
LNC_003750	XLOC_077228	0.36254	0.396311	5.50877	3.34725	3.0968	4.77928	0.390527	5.41284	6.21275	0.227431	4.89661	0.539074
LNC_003738	XLOC_076871	0.213505	0.444484	0.175508	0.24527	0.415043	0.217149	0.199001	0.220624	0.321767	0.439866	0.151993	0.402319
LNC_000709	XLOC_015308	0.018652	0.051353	0.012814	0.074745	0.028958	463.462	445.242	305.979	354.04	484.373	581.814	0.232684
LNC_003880	XLOC_079395	0.35652	0.060899	0	0	0	0	0	0	0	0	0	0
LNC_000283	XLOC_005317	0.456696	0.835525	0.739866	0.464307	0.309446	0.426636	0.434135	0.599143	0.774013	1.19864	1.03594	0.851745
LNC_000740	XLOC_015753	4.41288	8.986	8.46945	4.0219	7.41973	6.75301	6.15609	7.07657	8.99501	4.62875	7.93201	7.10462
LNC_004346	XLOC_089961	0.203943	0.332208	0.460548	0.32695	0.222985	0.364528	0.426067	0.246957	0.323624	0.5267	0.368261	0.279849
ENSMUST00000181191.1	ENSMUSG00000097868.1	1.52674	1.43949	1.17328	0.806807	1.37759	0.869772	0.968043	1.26254	1.32962	0.923603	1.77673	2.09278
ENSMUST00000224664.1	ENSMUSG00000097360.8	0.206998	0.456494	0.258039	0.165218	0.095792	0.324721	1.07063	0.658434	0.50376	0.457558	0.349454	0.741941
LNC_003099	XLOC_064401	0.28439	0	0	0.270489	0	0.175182	0	0	0.681105	0.249364	0	0.353088
ENSMUST00000187401.1	ENSMUSG00000054493.2	0.263204	0.624675	0.427771	0.342111	0.469554	0.634159	0.401277	0.471812	0.373189	0.477568	0.203429	0.181614
LNC_004910	XLOC_100961	1.22148	0.837833	0.703157	0.569844	0.822017	0.47986	0.601841	0.757636	1.00828	0.665019	1.22791	1.02659
LNC_002813	XLOC_058957	0	0.2412	0	0	0	0.325127	0	0	0	0	0.090046	0
LNC_006160	XLOC_127488	0	0.106787	0	0	0	0	0	0	0	0.419175	0	0.138782
LNC_006335	XLOC_131558	0.029084	0	0	0	0.024139	2e-05	0	0	0	0.585222	0.015389	0
LNC_005525	XLOC_113573	0.752468	0.302916	0.404161	0.012015	0.213142	0.431829	0.023684	0.588399	0.268006	0.53282	0.217307	0.517882
LNC_005799	XLOC_119989	0.036512	0.424449	0.122339	0.093917	0.078291	0.062954	0.066317	0	0.077468	0.044494	0.055496	0.244623
LNC_003031	XLOC_063315	0	0.310663	0.255487	0.348098	0.30392	0	0	0.270178	0	0.5801	0.159908	0.588468
LNC_000257	XLOC_004739	0.312475	0	0	0.110523	0.101283	0.007366	0	0.091899	0.381473	0.105011	0.107845	0
LNC_003322	XLOC_068527	1.59368	0.845967	1.64278	1.41008	1.64159	1.37668	1.40518	1.13526	2.02581	2.25546	2.78581	2.65351
LNC_002686	XLOC_056781	0.345576	0.088665	0	0	0	0	0	0	0	0	0.086276	0
LNC_005443	XLOC_112136	0	0	0	0	0	0	0	0	0	0.346221	0	0.398907
LNC_005328	XLOC_109407	0	0	0.437844	0	0	0.10027	0	0	0.088622	0	0	0
LNC_001058	XLOC_021460	0.1577	0	0	0	0	0.133756	0.154563	0.419273	0	0	0	0.156654
LNC_002078	XLOC_044374	0	0	0	0.946228	0.016444	0	0	0	0.019026	0	0	0
ENSMUST00000191819.1	ENSMUSG00000103991.1	0.914585	0.877907	0.546138	0.982482	0.438384	0.7067	0.748389	0.60804	0.717603	0.514201	0.415244	0.823536
LNC_005754	XLOC_118435	0	0.190354	0.370353	0.288543	0.272781	0.102988	0.209597	0	0.217765	0.209529	0.169713	0.374499
LNC_001725	XLOC_035872	0.428251	0.486649	0.342573	0.27182	0.313827	0.269535	0.255588	0.57011	0.470845	0.499029	0.285018	0.435149
LNC_002344	XLOC_049765	0	0	0	0	0	0.08497	0	0.307073	0	0	0	0
LNC_006165	XLOC_127516	0.009951	0	0	0.458433	0	0.559061	0	0	0.17256	0.506063	0	0
LNC_003937	XLOC_081071	0	0.691285	0.571927	0.377546	0.393681	0.775729	0.859923	0.45006	0.692177	0.760629	0.678486	1.23832
LNC_000744	XLOC_015791	0.399942	0.073292	0	0	0	0	0	0.03363	0	0	0	0
ENSMUST00000133694.1	ENSMUSG00000085237.2	0.33299	0.081592	0.334446	0.329524	0.358764	0.445475	0.215328	0.445831	0.247806	0.425502	0.395858	0.157647
LNC_002379	XLOC_050532	0.760178	0.503478	0.838051	0.448137	0.587191	0.395783	0.426537	0.325072	0.558618	0.869624	0.944795	0.695599
ENSMUST00000218348.1	ENSMUSG00000112301.1	0.272972	0.596783	0.323423	0.31588	0.193766	0.43662	0.390203	0.35051	0.586708	0.160821	0.098048	0.510657
LNC_005316	XLOC_109180	0	0.07871	0	0	0	0.310889	0.159676	0.263736	0.182284	0.394122	0.215662	0
ENSMUST00000146227.7	ENSMUSG00000087174.7	0.528321	0.792085	0.43704	0	0	0.309988	0.50796	0.588675	0.383417	0.37649	0.361706	0.567684
LNC_002373	XLOC_050400	1.02518	0.403005	0.750729	0.356178	0.746397	0.716117	1.20893	0.971928	1.16609	1.23106	0.737081	1.16234
ENSMUST00000191155.1	ENSMUSG00000053081.3	1.11994	2.11303	1.335	1.90762	1.58194	1.76772	1.42613	1.45011	2.34048	2.07642	1.79314	1.69243
LNC_003388	XLOC_069817	0	0	0.16203	0	0	0.143881	0.331379	0.116765	0	0.364493	0	0
LNC_000255	XLOC_004688	0	0.104322	0	0.435147	0.0317	0.053817	0	0.048822	0.029949	0.083684	0.066605	0.059244
ENSMUST00000207816.1	ENSMUSG00000108880.1	6.29854	5.0122	3.55444	4.18244	4.63242	4.51637	4.0657	4.63908	3.44952	4.3225	3.47641	4.27765
LNC_002113	XLOC_045654	0.02211	0.36047	0.301844	0.677999	0.295958	0.452043	0.267457	0.330453	0.512639	0.649269	0.225057	0.349621
ENSMUST00000192389.1	ENSMUSG00000103657.1	0.506556	0.529593	0.656162	0.637046	0.504478	0.490369	0.447417	0.462602	0.499641	0.55677	0.388814	0.470016
LNC_004019	XLOC_082715	0	0.466317	0.261345	0	0.167473	0.215142	0.314284	0.346067	0	0.207	0.340236	0.546562
LNC_006660	XLOC_138410	0.796933	0.649199	0.64947	0.871603	0.502787	0.57996	0.478837	0.655289	0.762702	0.809702	0.756302	0.710615
ENSMUST00000155531.1	ENSMUSG00000086191.1	0.603476	1.19919	1.11556	1.15616	0.704801	0.763494	0.929647	0.723289	0.979965	1.07558	1.59057	0.87487
LNC_006752	XLOC_140460	0.582873	0.142075	0	0	0	0	0	0.195086	0	0.318472	0.274609	0
ENSMUST00000210728.1	ENSMUSG00000109727.1	0.609559	0.335084	0.345459	0.370372	0.268042	0.45689	0.382856	0.384187	0.242498	0.386929	0.233525	0.47984
LNC_000155	XLOC_003108	0	0	0.041124	0.031554	0.02848	0.04894	0.143781	0.025775	0.295769	0	0	0
LNC_004764	XLOC_097927	0.156712	0.227902	0.065315	0.133708	0.175305	0	0.175635	0	0.153366	0.11182	0.201392	0.394799
ENSMUST00000207700.1	ENSMUSG00000108894.1	0.000889	0.000886	0.000457	0.000473	0.000588	0.00079	0.001139	0.000955	0.001625	0.001885	0.00159	0.000708
ENSMUST00000228424.1	ENSMUSG00000115417.1	0.339609	0.374114	0.145915	0.155813	0.07249	0.197243	0.229418	0.168739	0.187124	0.31314	0.460588	0.221054
LNC_002361	XLOC_050227	0.00166	0.27066	0.960065	0	0.200158	0.593459	0.201123	0.764737	0.199644	0.859154	1.41634	0
ENSMUST00000199764.1	ENSMUSG00000105302.1	0.236511	0.323727	0.290434	0.664058	0.583052	0.339054	0.338418	0.590511	0.495746	0.387988	0.412692	0.404343
ENSMUST00000220167.1	ENSMUSG00000112466.1	0.233744	0.541942	0.039818	0.105313	0.502424	0.156855	0.337935	0.325669	0.099234	0.249872	0.131378	0.275965
LNC_004159	XLOC_086000	0.035398	0	0.00143	0	0.041713	0	0	0.008892	0	0.418735	0	0.078246
LNC_000145	XLOC_002821	0	0	0	0.450075	0	0	0.225809	0	0	0.202968	0	0
LNC_001183	XLOC_023710	1.29034	1.00608	0.93647	0.942712	0.758312	0.8108	0.681075	0.782034	1.01621	1.2617	1.22885	1.49726
ENSMUST00000212253.1	ENSMUSG00000110618.1	0.048795	1.3393	1.4083	1.01583	1.55855	1.40674	1.00242	1.06701	1.3737	1.5044	0.883613	1.05609
LNC_004498	XLOC_092669	0	0	0.098406	0	0.214239	0.314974	0	0.117318	0	0.11373	0	0
LNC_001113	XLOC_022897	1.32743	0.795449	0.821619	0.960792	0.528908	0.489746	0.625591	0.974213	1.21305	1.30422	0.985944	1.00805
LNC_005999	XLOC_124455	0	0.215899	0.079593	0.310158	0.07738	0.167217	0.066539	0.0537	0.437715	0.191939	0.079396	0.191424
LNC_002701	XLOC_057030	10.3825	7.69444	7.01718	5.43346	7.84218	7.49496	5.80813	6.74355	8.09598	10.6587	10.6549	10.7904
ENSMUST00000203084.1	ENSMUSG00000108108.1	0.368584	0.44641	0.400491	0.603533	0.353649	0.478526	0.280044	0.359719	0.297669	0.346739	0.337517	0.299473
LNC_001866	XLOC_039170	3.14902	0.2817	0.625756	0.272902	0.308103	0.383774	0.267697	0.47354	0.354096	0.623008	0.983327	0.502852
ENSMUST00000182488.1	ENSMUSG00000109224.1	5.27813	5.28768	5.58531	3.50398	6.13852	6.7862	5.89782	4.608	5.85709	5.51657	4.91784	5.54481
LNC_005368	XLOC_110229	0.267285	0.169144	0.206353	0.087185	0.179782	0.043454	0.095077	0.078519	0.071879	0.328765	0.116496	0.109782
ENSMUST00000166047.1	ENSMUSG00000090458.1	1.62957	1.07275	1.30468	1.1512	0.824388	1.05658	1.13588	1.08371	1.4472	1.58643	1.575	1.76874
LNC_001089	XLOC_022495	0	0.329165	0	0	0	0	0	0.072827	0	0.142388	0.224463	0
ENSMUST00000191153.6	ENSMUSG00000064043.13	0.833704	0.466317	0.654562	1.53397	0.58894	1.4859	1.48237	0.511029	0.529254	2.23892	0.555075	0.772992
LNC_000411	XLOC_008302	0.206605	0.138903	0	0.538095	0	0.06418	0	0	0.256234	0.160469	0.065778	0.206238
ENSMUST00000231833	ENSMUSG00000116618	1.35305	0.959255	0.967248	0.898124	0.57155	1.45938	0.950548	0.794908	0.745534	0.570886	1.10078	1.14666
LNC_006570	XLOC_136232	0	0	0	0	0	0	0	0.024872	0	0.657231	0	0
LNC_001864	XLOC_039144	0.422152	0	0	0.104919	0	0	0	0	0	0	0	0
LNC_003459	XLOC_071114	0.037244	0.346643	0.074365	0	0	0.070236	0	0.121917	0.056293	0	0	0
LNC_000893	XLOC_019076	0	0.073221	0.508714	0.038239	0	0.076566	0	0	0.113731	0.171217	0.243537	0
ENSMUST00000181055.1	ENSMUSG00000097381.2	1.14199	1.03239	0.961453	1.26436	0.800439	0.914396	0.639736	0.722182	0.917918	0.962175	0.830386	1.01587
LNC_001250	XLOC_024631	0.032207	0.351306	0.254281	0.303502	0.079444	0.10659	0.044394	0.13103	0.214527	0.438599	0	0.085676
LNC_003867	XLOC_079081	0.218281	0.260251	0.386856	0.49657	0.281833	0.340537	0.358056	0.123074	0.631262	0.478006	0.454487	0.437891
LNC_005395	XLOC_110926	0.276603	0.437174	0	0.222445	0.153076	0.319283	0.29497	0.1827	0.559152	0.072855	0.309272	0.289453
LNC_001523	XLOC_031411	0	0	0	0	0	0	0	0	0	0.385449	0	0
LNC_001881	XLOC_039571	0.257271	0.024534	0	0.118372	0.055324	0	0.03164	0.283107	0.178562	0	0.034238	0.413318
LNC_004973	XLOC_102131	0.388771	0.360446	0.273483	0.153706	0.096178	0.125374	0.247158	0.194113	0.280661	0.336362	0.481661	0.270067
ENSMUST00000197762.1	ENSMUSG00000106237.1	2.60607	1.83388	1.31528	2.34007	1.94741	1.82928	2.17186	2.42364	1.82039	2.05887	1.87406	2.05405
LNC_002545	XLOC_053661	0.273645	0.282246	0.182202	0.246406	0.167496	0.147892	0.099167	0.162446	0.248947	0.333131	0.461464	0.42078
ENSMUST00000132296.1	ENSMUSG00000084936.1	0.856738	0.760081	1.71179	0.974142	1.00745	0.534969	0.981266	0.902628	0.800621	0.736516	1.66808	1.04456
LNC_003602	XLOC_073983	0.042153	0.492931	0.026367	0.107118	0	0.129576	0	0.179054	0	0	0.136905	0
LNC_006118	XLOC_126649	0.06163	0.235866	0	0	0.112885	0.149005	0.386265	0.071736	0.307491	0	0.177231	0
LNC_004984	XLOC_102317	0.328756	0.135576	0	0.172355	0	0	0	0	0	0	0	0
LNC_003912	XLOC_080050	0.62111	0.720311	0	0.557318	0.849471	0	0	0.341998	0.430723	1.24984	0.665477	0.906903
LNC_005025	XLOC_102978	0.033589	0	0.044235	0.143112	0.064072	0.118507	0	0.112775	0.237412	0.208939	0.29026	0
LNC_003827	XLOC_078550	1.44289	1.84504	0.931503	0.14401	1.21572	0.449512	0.923517	0.501036	0.946729	1.4882	1.73526	1.08076
LNC_003151	XLOC_065391	0	0.174869	0.177485	0.090283	0.150803	0.185447	0.132588	0.213399	0.07447	0.298954	0.331239	0.426177
LNC_004931	XLOC_101363	0	0.345872	0	0	0	0	0	0	0.080372	0	0	0.034954
LNC_001072	XLOC_021787	0	0.029921	0.047031	0.015985	0.009344	0	0.005758	0	0.074403	0	0.011725	0.015196
ENSMUST00000195253.1	ENSMUSG00000103885.1	0.027739	0.224516	0.256687	0.61255	0.089353	0.379437	0.342043	0.374568	0.329136	0.419809	0.432495	0.436837
LNC_000483	XLOC_009545	0.420559	0	0	0	0	0	0	0	0	0	0	0
LNC_002768	XLOC_058385	0.061806	0	0	0.399145	0.052771	0	0.029452	0	0	0	0.064062	0.066152
ENSMUST00000226673.1	ENSMUSG00000115756.1	0.437607	0.275996	0.149717	0.145922	0.065416	0.143852	0.238589	0.112672	0.299304	0.097644	0.150162	0.262769
LNC_005356	XLOC_110060	0	0.541529	0	0.134201	0.16328	0	0	0.096452	0.036386	0	0.095887	0.112219
LNC_005073	XLOC_103922	0.11748	0	0	0	0.145287	0	0	0.128125	0.365314	0	0.150123	0
LNC_000768	XLOC_016245	0.234135	0.123437	0.249046	0.339889	0.064776	0.076045	0	0.137409	0.350215	0.103287	0.40658	0.437844
LNC_001510	XLOC_031144	0.659553	1.15824	0.846664	0.437116	0.902319	0.906979	0.613457	0.909292	0.677952	1.17353	0.818004	1.07102
LNC_005064	XLOC_103727	0	0.156682	0.158712	0.092306	0	0.125046	0.096806	0	0	0	0.407524	0
ENSMUST00000198200.1	ENSMUSG00000104745.1	0.060406	0.096966	0.066468	0.521941	0.059599	0.09062	0.050624	0.207295	0.168357	0.138636	0.222364	0.153933
LNC_000823	XLOC_017352	0.441514	0	0	0.153299	0	0.327777	0	0.462467	0.03586	0	0.233533	0
LNC_002257	XLOC_048325	0.402094	0.113079	0.273779	0.046705	0.428237	0.283273	0.228636	0.075527	0.274042	0.471042	0.299732	0.349103
ENSMUST00000152600.1	ENSMUSG00000084899.1	0.268873	0.554796	0.840458	0.536389	0.683751	0.65921	0.653699	0.437991	0.86713	0.673506	0.640938	1.40409
LNC_003559	XLOC_073181	0	0.405807	0.610206	0.391164	0.283629	0.47353	0.603975	0.46609	0.357036	0.816138	1.21559	0.965854
LNC_006173	XLOC_127631	0	0.336228	0	0	0	0	0	0	0	0	0	0.281019
LNC_004583	XLOC_094418	0.036818	0.271749	0.117489	0.140301	0.035116	0.304934	0.37258	0.064823	0.16246	0.178619	0.110304	0.099501
LNC_005067	XLOC_103768	0.199915	0.327884	0.15664	0.194922	0.093297	0.280226	0.123478	0.247974	0.412079	0.070377	0.097231	0.543447
LNC_001015	XLOC_020670	0	0	0	0.293092	0	0	0	0.229871	0	0.32886	0.403248	0.134223
LNC_005621	XLOC_115720	0.031697	0.405521	0.356418	0.103533	0.32711	0.081537	0.575075	0.413535	0.178959	0.274194	0.252601	0.126517
LNC_001032	XLOC_020879	0.201691	0.092851	0.112529	0.269849	0.07017	0.107007	0.06	0.029326	0.677196	0.082855	0.037618	0.062017
LNC_003380	XLOC_069643	0.002048	0.429287	0.21872	0.223626	0	0.017201	0.000909	0.063316	0.13716	0.005841	0.273792	0.018149
LNC_002284	XLOC_049043	0	0.081917	0.620019	0.087411	0	0.156301	0.012439	0.488489	0.112367	0.647992	0.319054	0.414793
LNC_001794	XLOC_037495	0	0	0	0	0.320882	0	0	0	0.032771	0	0	0
LNC_000352	XLOC_007001	0	0.835562	0.287597	0.175926	0.154447	0.126694	0.264483	0.484744	0.197413	0.10919	0	0.214989
LNC_003849	XLOC_078802	0.189485	0.507209	0.61061	0.771969	0.391835	0.436347	0.510609	0.404687	0.597169	6.5e-05	0.507001	0.326645
LNC_000329	XLOC_006412	0	0	0	0.078558	0	0	0	0.317508	0.10905	0	0	0.135503
LNC_002294	XLOC_049127	0	0	0	0	0	0	0	0	0.307491	0	0	0
LNC_006623	XLOC_137688	0.160575	0.271588	0.148205	0	0.1391	0	0.062013	0.133731	0.323677	0.256032	0.276967	0.568581
LNC_005086	XLOC_104125	0.090802	0.162707	0.082324	0.117365	0.220465	0	0	0	0.159631	0.162741	0	0.242599
ENSMUST00000156926.1	ENSMUSG00000084849.1	0	0.588477	0.274778	1.00827	0.359395	0.281997	0.144611	0.258489	0.497674	0.559786	0.300208	0.536707
LNC_000848	XLOC_018144	0	0.100157	0.099373	0.198268	0.08649	0	0	0.122521	0.081771	0	0	0.185406
LNC_003561	XLOC_073181	0	0	0	0	0	0	0	0.287581	0.007116	0.03464	0	0
LNC_002652	XLOC_056062	20.9949	18.8449	22.9269	16.7683	19.6803	16.9185	13.9112	15.1969	21.7994	26.2452	26.0706	27.3555
LNC_003423	XLOC_070358	1.55022	0.597061	0.621528	0.645258	0.709297	1.11387	0.962267	0.739306	0.678543	1.06395	0.80684	0.965593
LNC_005712	XLOC_117635	0.237376	0	0	0	0.155463	0	0.040907	0	0.527621	0.240821	0.237053	0
LNC_005950	XLOC_123523	0.376063	0.467531	0.376828	0.610107	0.499849	0.352097	0.192461	0.309484	0.473089	0.455286	0.543185	0.381436
LNC_003495	XLOC_071746	0	0.141184	0	0	0.207886	0	0.085905	0	0.106236	0	0	0.631854
LNC_005371	XLOC_110369	0.224183	0.787177	0.448623	0.842507	0.420047	0.415744	0.760362	0.515564	0.668236	0.788857	0.579651	0.498974
LNC_005884	XLOC_122077	0	0	0.462556	0	0	0	0.154171	0.127322	0	0	0	0.146733
LNC_003809	XLOC_078152	0.766889	0.391054	0.197248	0.403794	0.643001	0.301143	0.422134	0.435319	0.497758	0.975797	0.755144	0.959729
LNC_006447	XLOC_133786	0	0.102019	0	0	0	0	0	0	0.456833	0	0	0
LNC_001378	XLOC_028324	0	0	0.078248	0.031222	0.069928	0	0	0.060308	0.146368	0.423252	0	0.076948
LNC_004207	XLOC_086735	0	0	0	0	0	0	0.472864	0	0	0.34556	0	0
LNC_000153	XLOC_003077	0	0	0	0	0.657018	0.02298	0	0	0	0	0	0.045253
LNC_000321	XLOC_006382	1.83842	1.17827	1.21222	1.37222	0.679774	0.906139	1.34218	1.59448	1.69389	0.981916	1.55484	1.27515
ENSMUST00000181563.1	ENSMUSG00000097649.2	1.41421	2.97842	4.33625	3.07753	2.43938	3.09097	3.51995	2.96501	2.95399	3.33448	4.23762	2.86666
LNC_000906	XLOC_019214	0	0.057909	0	0	0.296501	0	0	0	0	0	0	0
LNC_001363	XLOC_028055	0.067945	0.077514	0.276469	0.207659	0.183236	0.129572	0.052242	0	0.37368	0.217555	0.244715	0.153796
ENSMUST00000199941.4	ENSMUSG00000105987.4	0.951878	0.709861	0.907213	0.821963	0.623407	0.577668	0.755538	0.741653	0.866155	0.701772	0.683722	0.680005
ENSMUST00000209164.1	ENSMUSG00000097162.2	3.52729	0.399929	0.695646	0.260662	0.449672	1.5552	2.01302	0.366743	2.17032	3.04057	0.322639	0.421713
LNC_002855	XLOC_059746	0.505537	0.369134	0.514159	0.330509	0.325784	0.291326	0.430146	0.368187	0.409171	0.754419	0.758293	0.75724
LNC_000725	XLOC_015635	0.369034	0.064852	0.246862	0.058929	0.117324	0.119859	0.128065	0	0.071807	0	0	0
ENSMUST00000142815.1	ENSMUSG00000085408.1	3.25592	2.55853	2.27336	2.28829	2.72386	2.88385	2.77409	2.32304	2.92604	2.88278	2.92514	2.68429
LNC_003666	XLOC_075395	1.00957	0	0	0.126923	0.031217	0	0	0	0.835411	0.010966	0.030372	0.010201
ENSMUST00000195720.1	ENSMUSG00000103591.1	0.233223	0.189331	0.237119	0.477217	0.234713	0.219265	0.18457	0.261182	0.153753	0.293717	0.196298	0.109579
LNC_004700	XLOC_096301	7.26675	1.7607	1.89432	1.28465	1.64796	1.84645	1.66854	1.84028	1.37403	1.52141	2.2496	2.04295
ENSMUST00000129780.1	ENSMUSG00000085154.7	1.5243	1.15759	1.15013	1.42686	0.87946	0.866373	1.33306	0.757369	0.846621	1.07564	0.479341	1.05762
LNC_000092	XLOC_001545	0	0	0	0	0	0	0.380767	0	0	0.101985	0	0
LNC_004452	XLOC_091823	1.4708	1.74203	1.29155	1.94641	1.57675	1.38232	1.87106	1.27936	1.96279	1.81815	2.77497	1.21095
LNC_000110	XLOC_001820	0	0	0.089217	0.085965	0.291762	0.231186	0.36467	0	0	0	0	0
LNC_003680	XLOC_075759	0.6675	0.938884	0.937832	0.859161	0.642687	0.460817	0	0.849763	0	0	1.03303	0
LNC_005422	XLOC_111485	0	0	0	0	0	0	0	0	0.286375	0	0	0
ENSMUST00000160227.7	ENSMUSG00000090086.7	0.766052	1.02024	0.735581	0.649376	0.586248	0.50884	0.521315	1.30339	0.735347	0.936785	0.915119	0.713306
ENSMUST00000209931.1	ENSMUSG00000110411.1	0.74872	0.838785	0.432337	0.896052	0.660997	0.555636	0.371256	0.731211	0.678955	0.638668	0.516909	0.529232
ENSMUST00000139874.1	ENSMUSG00000086426.1	0.46183	0.107087	0	0	0	0.067111	0.081147	0	0.093378	0	0	0
LNC_001640	XLOC_033679	0.13254	0.079392	0.449578	0.346686	0.650752	0.372051	0.421817	0.179391	0.383977	0.410147	0.499542	0.597546
LNC_003965	XLOC_081866	0	0.337377	0.420213	0.245181	0.1049	0.348338	0.271231	0.203089	0.369683	0.031176	0.220433	0.094028
LNC_002343	XLOC_049762	0.105207	0.196059	0.04832	0.057354	0.35671	0.511381	0.54899	0.346512	0.297709	0.365421	0.600894	0.025381
LNC_005487	XLOC_112983	0.325097	0.310396	0.125591	0.361617	0.335092	0.140144	0.160991	0.211262	0.299288	0.606053	0.234224	0.201826
LNC_002789	XLOC_058561	0.735057	0.365989	0.491142	0.748712	0.742534	0.494204	0.489504	0.758169	0.773191	0.668348	0.612658	0.671516
LNC_004470	XLOC_092018	6.62191	11.1316	7.24324	11.0961	8.05179	7.12244	6.07814	6.39307	6.09517	6.30236	6.96957	8.56208
LNC_004998	XLOC_102535	0.080009	0.135002	0	0	0.059309	0.131114	0.229732	0.07914	0.048675	0.111997	0.442427	0.095499
LNC_002559	XLOC_054014	0	0	0	0	0	0	0	0.470275	0	0	0	0
ENSMUST00000181871.1	ENSMUSG00000097080.7	0.575881	0.713861	0.954439	0.839151	0.826888	0.604514	0.582841	0.916827	0.711187	0.662342	0.475129	0.925074
LNC_003828	XLOC_078565	4.03527	3.5602	4.10229	4.58662	3.23019	2.81779	2.92714	2.91762	4.82383	5.18366	5.55816	3.71205
LNC_003672	XLOC_075536	0	0.311525	0.291474	0.099104	0.426665	0.282521	0.357809	0.074956	0.192104	0.348493	0.085219	0.440957
LNC_005805	XLOC_120093	0.337722	0	0	0	0	0	0	0	0	0.144393	0	0
LNC_005666	XLOC_116500	0.5595	1.77226	1.99598	1.84917	0.626386	0.912277	0.886386	1.15263	1.00008	0.129873	0.943309	0.002097
LNC_006552	XLOC_135872	0.716471	0.679765	0.458858	0.290768	0.427092	0.310862	0.385183	0.637662	0.145641	0.563453	0.628517	0.895079
LNC_002587	XLOC_055050	0	5.03688	4.34096	7.24606	2.09487	3.16923	3.06977	0	3.98194	4.6745	0	3.66515
ENSMUST00000155166.1	ENSMUSG00000086465.1	2.70169	3.58938	3.67859	0.278733	3.20221	2.49531	0.423058	0.737056	0.328705	0.278282	0.274779	0.294609
LNC_004637	XLOC_095420	0.205961	0.513022	0.495483	0.325991	0.258607	0.164518	0.311322	0.199033	0.360017	0.617799	0.218868	0.348836
LNC_000762	XLOC_016123	0	0.029311	0	0.064191	0	0	0	0	0	0	0.176633	0.309387
LNC_000361	XLOC_007167	0.213522	0.672978	0.239202	0.215464	0.248354	0.587221	0.27726	0.226957	0.811722	0	0.461423	0.676401
ENSMUST00000174321.1	ENSMUSG00000092564.1	4.46247	3.80669	4.41763	3.33021	4.65064	4.99176	3.86043	2.83049	5.08443	4.93465	4.43207	4.0459
ENSMUST00000192994.1	ENSMUSG00000103039.1	0.301277	0.547293	0.520348	0.442001	0.212637	0.45883	0.36094	0.277415	0.274461	0.574428	0.318345	0.289147
LNC_000795	XLOC_016807	0.259205	0.283866	0	0.176268	0.521855	0.061626	0	0.12072	0.329097	0.021019	0	0
LNC_003377	XLOC_069604	0.528386	1.52494	0.811667	1.43396	0.988676	0.560589	0.577761	0.710593	1.06475	1.18599	0.839191	1.20078
LNC_006718	XLOC_139719	0	0	0	0.350188	0	0	0	0	0	0.162589	0	0
LNC_000911	XLOC_019340	0.116092	0	0	0	0	0	0	0.180349	0.09138	0.359587	0	0.105719
LNC_000192	XLOC_003762	0.073129	0	0	0	0	0.427054	0.311809	0.069789	0.277366	0	0.173079	0.152988
ENSMUST00000194205.1	ENSMUSG00000102970.1	0.07283	0.551151	0.157471	0.079943	0.06246	0.119305	0.06325	0.149715	0.298162	0.101987	0.123663	0.069954
LNC_004052	XLOC_083492	0	0	0	0	0	0	0	0.581392	0	0	0	0
ENSMUST00000129379.1	ENSMUSG00000085207.1	0.528254	1.7938	1.40002	1.68186	1.84203	1.98584	1.07313	0.861659	1.29673	2.4598	1.59959	1.56277
ENSMUST00000181482.1	ENSMUSG00000097431.2	10.7202	2.64583	3.09027	3.25996	4.52307	4.61119	2.21788	4.2143	3.60714	2.45139	2.07171	3.36325
LNC_000478	XLOC_009454	0	0.152778	0.430138	0	0.145761	0.057916	0	0	0.32682	0	0.187472	0.061138
ENSMUST00000197977.4	ENSMUSG00000105265.4	19.8845	2.74332	2.57081	2.03473	8.53304	2.65397	2.45618	8.85408	2.20929	9.26887	8.63571	3.16217
LNC_002067	XLOC_044026	0.23355	0.930879	1.07555	1.26707	0.144505	0.701629	0.701402	0.862893	1.52119	1.31274	0.978462	0.689029
LNC_004786	XLOC_098555	0.592146	0.634798	0.585842	0.555055	0.567896	0.499886	0.510642	0.487285	0.609254	0.58636	0.598407	0.569845
LNC_005478	XLOC_112729	1.25269	0.007251	0.674277	0.682233	0.005963	0.010525	0.009873	0	0.130367	0	0.002788	0
ENSMUST00000204296.1	ENSMUSG00000107603.1	0.73207	0.226819	0.085631	0.115332	0.019772	0.292757	0.220833	0.180732	0.192134	0.142272	0.16976	0.086377
LNC_001379	XLOC_028325	0	0.538058	0.026688	0.01889	0.194681	0	0.225559	0.449221	0.238305	0	0.092654	0.016013
LNC_000579	XLOC_012349	0	0.112434	0.18343	0.028216	0.526322	0	0	0.034842	0.026478	0.011644	0.031142	0.077101
LNC_006199	XLOC_128182	0	0	0.104764	0.204854	0	0	0	0.095529	0.29033	0.414732	0.039764	0
LNC_001896	XLOC_039887	0.388999	0.181403	0.211409	0.145203	0.142525	0.157594	0.137254	0.326921	0.078385	0.260137	0.146277	0.408401
LNC_003091	XLOC_064195	0	0	0	0.14795	0	0.381026	0	0	0	0	0.097628	0
LNC_001737	XLOC_036321	0.172868	0	0.270861	0.05826	0	0	0	0.04906	0.056185	0.078013	0.173396	0.433694
LNC_000520	XLOC_010912	0.267199	0.303755	0.332812	0.455603	0.347725	0.634626	0.130628	0.226489	0.475338	0.753192	0.443925	0.43512
ENSMUST00000212879.1	ENSMUSG00000110653.1	0.167672	0.904685	2.26563	2.46782	1.32096	1.20111	1.83005	1.56673	1.16032	2.15451	1.40191	1.54304
ENSMUST00000181335.2	ENSMUSG00000097825.5	0.147323	0.348455	0.423074	0.358908	0.180944	0.271054	0.390732	0.30447	0.124037	0.538956	0.267389	0.27626
ENSMUST00000151825.1	ENSMUSG00000087249.1	1.1042	1.26487	1.49212	1.83086	1.08256	0.927393	1.02603	1.21821	1.44139	0.915915	1.63825	1.83627
LNC_005020	XLOC_102864	1.09525	0.09909	0.284792	0.259	0.270702	0.306357	0.151272	0.114669	0.097426	0.186661	0.634952	0.131949
ENSMUST00000218206.1	ENSMUSG00000112317.1	0.445939	0.598649	0.557288	0.77654	0.517493	0.675531	0.486921	0.54001	0.362703	0.482472	0.588234	0.314035
LNC_002946	XLOC_061549	0	0.078589	0	0	0	0	0	0.309984	0.210823	0	0.078535	0
LNC_004718	XLOC_096869	0.465659	0.453586	0.615181	0.644705	0.510714	0.546341	0.357247	0.33614	0.764944	0.766839	0.698863	0.666717
ENSMUST00000181475.1	ENSMUSG00000097123.1	0.90098	0.776598	0.732489	0.695647	0.816342	0.666599	0.677649	0.439753	0.671763	0.760037	0.534757	0.783518
ENSMUST00000123944.1	ENSMUSG00000086496.1	1.45062	0.637884	0.723354	0.60247	0.582183	0.652418	0.801942	0.580793	0.570729	0.825335	0.676928	0.79358
LNC_002422	XLOC_051508	0.258553	0	0.746223	0.229764	0	0.153254	0.106288	0.182452	0.228991	0.146299	0	0.140852
LNC_005253	XLOC_108044	0	0	0.096881	0	0.231146	0	0	0	0	0.314662	0.20511	0
LNC_003785	XLOC_077689	0.952687	0	1.55511	0	1.47017	0.058096	0	1.37964	0	1.39242	0	1.37578
ENSMUST00000149246.7	ENSMUSG00000073164.11	0.384907	0.646271	0.350539	0.446586	0.208962	0.173504	0.198476	0.366171	0.563763	0.474393	0.285892	0.249832
ENSMUST00000212137.1	ENSMUSG00000110442.1	0.397089	0.630873	0.393428	0.667126	0.242298	0.517829	0.393961	0.456831	0.548826	0.569169	0.646753	0.517932
ENSMUST00000181498.2	ENSMUSG00000097397.2	0.201896	0.544242	0.743266	0.531892	0.450951	0.407773	0.255925	0.443831	0.413737	0.429953	0.479247	0.426503
ENSMUST00000209897.1	ENSMUSG00000109890.2	0.201799	0.522335	0.804853	0.376257	0.769177	0.534438	0.346469	0.723355	0.649853	0.872612	0.520859	0.410084
LNC_006343	XLOC_131728	0.447612	0.106499	0.29486	0.46456	0.294253	0.103421	0.098453	0	0.166496	0.195615	0.28725	0.665784
LNC_006241	XLOC_129158	0.276873	0.447161	0.61997	0.358624	0.270666	0.580506	0.364221	0.321897	0.450328	0.373206	0.528297	0.515926
LNC_002741	XLOC_057802	0	0	0.177638	0	0	0	0.10497	0	0.056383	0.215057	0	0.341056
LNC_005959	XLOC_123768	0.754238	0	0	0	0	0	0	0	0	0	0.695534	0
LNC_001763	XLOC_036761	0.674073	0.113538	0	0	0.532334	0.207742	0.104451	0	0.091224	0.221508	0.306468	0.22527
LNC_005417	XLOC_111235	0	0.522417	0	0	0.041165	0.075499	0	0.307739	0.064668	0	0.161529	0.163829
ENSMUST00000153239.7	ENSMUSG00000079671.8	0.183984	0.491	0.434206	0.347332	0.543645	0.337958	0.216461	0.300023	0.213547	0.879636	0.588748	0.530169
ENSMUST00000227492.1	ENSMUSG00000115398.1	0.107617	0.160417	0.404797	0.138428	0.294807	0.667042	0.263517	0.710339	0.276765	0.218016	0.037274	0.04578
LNC_003491	XLOC_071712	0.149425	0.04853	0.092475	0.020681	0.316343	0.096709	0.185848	0.190367	0.095791	0.279267	0.144396	0.060918
ENSMUST00000191298.1	ENSMUSG00000101823.1	0.238706	0.388908	0.264041	0.700324	0.287649	0.383492	0.220807	0.414601	0.337287	0.410395	0.255749	0.325932
LNC_000919	XLOC_019388	0	0	0	0	0	0	0	0	1.01677	0	0	0
LNC_002165	XLOC_046690	1.45545	0.80857	1.04198	1.18322	0.969768	0.544845	0.562097	0.801449	1.44644	1.71386	1.3551	1.35044
ENSMUST00000181053.2	ENSMUSG00000114860.1	0.435664	0.146432	0.080012	0.102839	0.100037	0	0.16478	0.072173	0.139761	0.113934	0.145451	0.073196
LNC_003214	XLOC_066434	0	0	0	0.299498	0	0	0	0	0.060373	0	0.454271	0
LNC_000267	XLOC_004846	0	0.182361	0.065224	0.337056	0	0.102111	0	0	0	0	0	0
LNC_001484	XLOC_030714	0	0	0	0	0	0	0	0.233595	0.190209	0.306247	0.290401	0
ENSMUST00000209540.1	ENSMUSG00000109836.1	53.5268	51.8167	45.0708	59.6016	50.8592	48.7862	59.2825	54.2119	50.0576	47.0829	46.1248	51.0494
ENSMUST00000211170.1	ENSMUSG00000110230.1	0.543661	2.77541	0.408226	2.96036	2.19905	1.85045	1.3077	1.89947	2.52274	0.528564	1.23362	0.491132
LNC_000820	XLOC_017318	0.442788	0.334287	0.423064	0.816054	0.31722	0.418408	0.094516	0.247308	0.128405	0.107726	0.378131	0.145206
LNC_006665	XLOC_138479	1.64637	1.70621	0.266339	1.36682	0.084725	1.38661	0.126777	0.046272	0.178846	0.329243	0.133226	0.39682
LNC_004465	XLOC_091915	0	0	0	0	0	0	0	0	0.566723	0	0	0
LNC_005170	XLOC_106276	1.5568	1.04623	1.54204	1.27175	1.43549	0.682624	0.853396	1.02539	1.43167	1.52027	1.41014	1.84107
LNC_000282	XLOC_005281	0.362433	0.095538	0.192758	0.197301	0.091604	0.088286	0	0	0.057221	0	0	0.087196
LNC_000199	XLOC_003871	0	0.647215	0	0.480261	0	0.434789	0.306447	0	0	0.378694	0	0.666846
LNC_004211	XLOC_086798	0	0	0	0	0	0	0	0	0	0.338728	0	0
ENSMUST00000173249.1	ENSMUSG00000092283.1	0.189579	0.303253	0.029556	0.087752	0.276611	0.158106	0.414267	0.117161	0.094521	0.303293	0.445374	0.32954
ENSMUST00000172178.1	ENSMUSG00000092071.1	0.55587	0.702725	0.810937	0.695883	0.576378	0.420983	0.792056	0.830143	0.891187	0.991015	0.921695	0.65988
ENSMUST00000083393	ENSMUSG00000065327	0.536469	0.576187	0.505627	0.636275	0.689207	0.386495	0.316798	0.629803	0.5008	0.688229	1.03039	0.892921
ENSMUST00000213497.1	ENSMUSG00000097890.2	0.373256	0.587458	0	0.25583	0.396787	0.340437	0.119207	0.273787	0.432842	0.300606	0.32153	0.229122
ENSMUST00000222224.1	ENSMUSG00000114169.1	0.139134	2.85845	0.67905	0.727774	1.28926	0.938259	0.188009	0.87263	0.911583	0.369743	0.652496	0.988285
LNC_004816	XLOC_099317	0.324234	0.56319	0.356272	1.12007	0.394232	0.492363	0.545631	0.579101	0.532927	0.493228	0.345818	0.380384
LNC_003807	XLOC_078009	0	0	0	0	0	0	0	0.291994	0	0	0	0
LNC_000003	XLOC_000102	0.188843	0.096349	0.646516	0.148305	0.130015	0.26394	0.097705	0.169232	0	0	0	0.20571
LNC_004293	XLOC_088807	0.759929	5.89144	7.64258	6.88773	2.10531	2.02412	7.98455	8.05757	2.52725	2.56834	7.61915	7.43255
LNC_003859	XLOC_078944	0.456274	0.632167	0.357895	0.515623	0.339272	0.314154	0.444069	0.274673	0.272876	0.203785	0.721088	0.481105
LNC_004966	XLOC_101972	0.53436	0.40512	0.584018	0.357683	0.364632	0.333437	0.247218	0.393181	0.587772	0.863714	0.803167	0.655405
LNC_006532	XLOC_135345	0.126043	0	0.245207	0.135424	0	0.226773	0	0.291994	0	0.08334	0	0
LNC_003414	XLOC_070183	0.401305	0.543633	0.595983	0.436925	0.516532	0.358623	0.785476	0.088487	0.606158	0.835188	0.617549	0.584484
ENSMUST00000223391.1	ENSMUSG00000113165.1	1.0784	0.938677	0.701566	0.851994	0.744401	0.688467	0.728455	0.741958	0.694072	0.837973	1.08263	0.697125
LNC_002250	XLOC_048188	0.378111	0.070013	0	0	0	0	0	0	0	0.09955	0	0
LNC_004070	XLOC_083758	0	0	0.033181	0	0	0	0	0.27978	0	0	0	0
LNC_005856	XLOC_121193	0.954484	0.624711	1.06211	0.945596	0.880364	0.489933	0.657641	0.99311	1.09132	1.23892	1.31963	1.39651
LNC_001368	XLOC_028090	0.430672	0.540715	1.02424	0.720676	0.59289	0.485214	0.382962	0.618611	1.0526	0.967193	0.926499	0.858667
ENSMUST00000205812.1	ENSMUSG00000108477.1	0.783628	1.34561	0.897818	0.622057	0.613696	0.80771	0.713305	0.905978	1.01205	0.964733	0.713137	1.09285
ENSMUST00000123613.1	ENSMUSG00000085838.1	3.30801	11.0881	13.5326	10.1524	8.92148	8.00593	5.81948	8.81464	14.3332	18.3382	15.0256	14.8234
LNC_004803	XLOC_098869	0.313497	0	0	0	0	0	0	0	0	0	0	0
ENSMUST00000217362.1	ENSMUSG00000111462.1	1.51003	0.859079	0.826185	1.1171	1.10278	0.979102	1.08164	1.22217	0.978958	0.764992	0.590882	0.913372
ENSMUST00000180416.1	ENSMUSG00000097582.1	0.057212	0.240008	0.112281	0.493265	0.162634	0.07408	0.081314	0.066089	0.275549	0.16	0.071104	0.131762
LNC_003911	XLOC_080050	0	0	0.732538	0.087611	0	0.530594	0.455191	0.261064	0.355425	0.300169	0.338767	0.004024
LNC_003589	XLOC_073642	0.106354	0.015448	0	0	0	0.066585	0.014155	0	0.021653	0	0.171754	0.287844
LNC_003090	XLOC_064189	0.137026	0.1799	0.205453	0.28016	0.141919	0.352773	0.06863	0.112979	0	0.067804	0	0
ENSMUST00000181068.1	ENSMUSG00000097590.1	0.337917	0.173236	0.291689	0.714471	0.170762	0.242903	0.238597	0.342648	0.317265	0.439664	0.343055	0.427399
ENSMUST00000188038.2	ENSMUSG00000108621.1	2.23294	1.49161	1.63311	2.37217	1.45318	1.81432	1.91932	1.68653	1.98412	1.71182	1.75676	1.90948
LNC_004151	XLOC_085889	1.62045	0.776021	0.712121	0.560404	0.562404	0.538502	0.441838	0.708899	1.039	1.00294	0.957703	1.15273
LNC_000271	XLOC_004956	0	0	0	0	0	0	0.213891	0	0.211827	0.087382	0	0
LNC_005212	XLOC_107275	0	0.121648	0.183873	0.188417	0	0.196725	0.245654	0.2534	0.103438	0.177998	0.17282	0.539641
ENSMUST00000185980.1	ENSMUSG00000100269.1	0.750765	0	0.103377	0.195069	0	0.203411	0.172858	0.109011	0.259756	0.166805	0.083818	0.052181
LNC_003556	XLOC_072983	0.691947	0.730839	0.400231	0.352868	0.36912	0.365353	0.453914	0.466678	0.186859	0.206894	0.321113	0.290097
LNC_000662	XLOC_014319	0.938304	0.769826	0.527132	0.523125	0.34824	0.449288	0.344438	0.721594	0.719642	0.584227	0.84349	0.768003
LNC_006779	XLOC_140980	0	0	0	0	0	0.706754	0	0.002535	3.90801	0	0.135854	0
LNC_005977	XLOC_124069	0.279419	0.33671	0.053524	0.033601	0.101524	0.137253	0.056733	0.140061	0.187845	0.123124	0.127383	0
LNC_002059	XLOC_043640	0	0	0	0	0	0	0	0.435399	0	0	0	0.042137
ENSMUST00000219079.1	ENSMUSG00000097331.2	0.358066	0.433156	0.607512	0.297381	0.450671	0.315533	0.537765	0.230993	0.292672	0.396143	0.273615	0.237156
LNC_003623	XLOC_074485	1.57471	1.13081	1.04558	0.965498	1.2097	0.701298	1.01287	1.13924	1.42578	1.61133	1.6658	1.50814
ENSMUST00000183215.7	ENSMUSG00000097451.10	13.6572	15.482	12.2196	8.66148	8.62932	11.3588	16.3899	12.1887	10.6624	14.8183	12.2875	15.6489
LNC_000288	XLOC_005608	0.645545	0.723341	0.754931	0.796818	0.653814	0.556214	0.490246	0.573975	0.792749	0.911389	0.812101	1.00501
LNC_004319	XLOC_089525	0.412542	0	0.04081	0	0	0	0.14471	0	0.123566	0	0.239012	0
LNC_005191	XLOC_106655	0	0	0.234907	0.069755	0	0	0.08881	0.084419	0.277254	0.178187	0.093192	0.355461
LNC_004308	XLOC_089392	0	0	0.036749	0	0	0	0	0	0	0	0.466739	0
LNC_001652	XLOC_033878	0	0	0	0	0.296501	0.228222	0.165689	0.015508	0.398305	0	0.157488	0.245754
LNC_006531	XLOC_135343	1.51232	0.810848	1.51652	1.20748	1.28631	1.17368	1.40099	1.3807	1.77152	2.24448	1.93141	1.97485
LNC_000185	XLOC_003726	0	0	0	0.053604	0.160314	0.087223	0.180028	0	0.087409	0.094272	0.033225	0.444772
LNC_004042	XLOC_083229	0.162912	0.136019	0.343383	0.421584	0.06576	0.293333	0.241042	0.540316	0.508854	0.339973	0.258078	0.901304
LNC_006088	XLOC_126107	0.205775	0	0	0	0.261973	0	0	0	0.124159	0	0	0
LNC_006368	XLOC_132189	0	0.359363	0	0	0	0	0	0	0	0	0	0
LNC_000327	XLOC_006410	0.116689	0	0	0	0	0.332086	0	0	0	0	0	0
LNC_000660	XLOC_014233	0	0.114009	0	0	0.259258	0	0	0	0.102258	0	0.270248	0.180078
LNC_006098	XLOC_126334	18.5984	10.789	16.7055	12.0865	15.0947	13.132	12.6708	13.7109	17.9313	24.5808	35.2752	20.1678
LNC_005078	XLOC_104000	0	0	0	0	0	0	0	0.146427	0	0.433096	0	0
ENSMUST00000194520.1	ENSMUSG00000103976.1	0.237962	0.35283	0.204927	0.470448	0.214708	0.320817	0.198777	0.303486	0.245435	0.426797	0.318924	0.330459
LNC_003503	XLOC_071989	0.18959	0.26687	0.146133	0.140035	0.335845	0.200612	0.284464	0.435299	0.551941	0.339891	0.157453	0.236068
LNC_000645	XLOC_013868	1.0846	0.591837	0.440438	0.589289	0.335228	0.509703	0.515316	0.503168	0.531078	0.680124	0.350114	0.500502
LNC_003676	XLOC_075592	0	0.347354	0.072772	0	0	0	0	0	0	0	0	0
ENSMUST00000181840.3	ENSMUSG00000097462.7	0.129558	0.085806	0.079428	0.189259	0.163051	0.184349	0.177076	0.113684	0.02639	0.516587	0.314128	0.382981
ENSMUST00000181189.2	ENSMUSG00000097162.2	0.103053	1.64578	1.70075	0.973946	1.43928	1.56733	0.134094	1.75548	0.175633	0.167967	1.7795	1.38035
LNC_002281	XLOC_048932	0	0	0	0.111345	0.388869	0	0	0	0	0	0	0.119777
LNC_006096	XLOC_126215	0.711075	0.539077	0.748817	1.18378	0.66954	0.555204	0.057785	0.518797	0.61776	0.343828	0.851731	0.908447
ENSMUST00000203963.1	ENSMUSG00000107742.1	1.85466	1.82173	1.22738	1.27447	1.36651	1.41464	0.992459	1.35663	1.48521	1.38925	1.32684	1.43273
LNC_006077	XLOC_126027	0	0	0	0.087907	0	0	0.247498	0.102198	0.417034	0	0	0.111676
ENSMUST00000141554.1	ENSMUSG00000086482.1	0	0.118568	0.869411	0	0.042785	0.124647	0.204241	0.20142	0.057698	0	0.373827	0.115584
LNC_005750	XLOC_118403	0.401543	0.64271	0.751902	0.502167	0.288757	0.365574	0.360863	0.364266	0.825177	1.0171	0.648555	1.41646
LNC_005210	XLOC_107146	0	0	0.192121	0.119665	0	0	0	0.290266	0	0.118449	0.293424	0
LNC_001756	XLOC_036677	0	0	0	0	0	0	0	0	0.176669	0.427471	0	0
ENSMUST00000179924.7	ENSMUSG00000079179.9	1.81067	2.44266	1.57128	1.80201	1.69506	1.32692	1.78132	1.62948	1.59901	2.37193	1.32464	1.78117
LNC_004041	XLOC_083212	1.24307	0.13607	0.163689	0.202778	0.077749	0.110818	0.02604	0.043886	0.183005	0.129699	0.635393	0.172434
ENSMUST00000195578.1	ENSMUSG00000102179.1	0.359179	1.00502	0.403341	0.559156	0.654917	0.297785	0.288999	0.518231	0.366116	0.301254	0.312254	0.550656
LNC_002092	XLOC_044641	0	0.469228	0.17017	0	0.127686	0	0.1276	0.223264	0	0.230835	0.137219	0.197461
LNC_000773	XLOC_016306	0.619066	0.058469	0.113155	0.295826	0.05289	0.595847	0	0.130307	0.045898	0.947326	0.085035	0.109878
LNC_005838	XLOC_120843	0.523231	0	0	0	0.04325	0	0	0	0	0	0	0
ENSMUST00000181605.1	ENSMUSG00000097006.7	2.82322	2.07988	2.09736	1.92019	2.14053	1.74958	1.35409	1.92162	2.15028	2.52589	2.45368	2.24563
LNC_006197	XLOC_128179	0.254929	0.088959	0.195949	0.303721	0.391016	0.442302	0.248768	0.443995	0.210665	0.356155	0.254912	0.277327
ENSMUST00000186923.1	ENSMUSG00000100252.6	1.10014	0.329833	0.131834	0.281679	0.441331	0.72954	0	0.269199	0.529974	0	0.913351	0.555999
LNC_002519	XLOC_053272	0.316904	0.23642	0.069265	0.405235	0.031053	0.151707	0.173531	0.315282	0.219104	0.240019	0.5509	0.102171
LNC_003919	XLOC_080462	0	0	0	0.395598	0	0.106262	0	0.111724	0	0	0.114533	0
LNC_002769	XLOC_058390	0	0	0	0	0	0	0	0	0	0	0	0.332128
LNC_001126	XLOC_023175	0.333966	0.823908	0.573731	0.383347	0.390462	0.355744	0.014088	0.508336	0.452355	0.867448	0.953905	0.8333
ENSMUST00000208814.1	ENSMUSG00000030623.4	0.186933	0.087996	0.445635	0.354465	0.284704	0.417463	0.331916	0.223112	0.610983	0.456841	0.497772	0.426674
LNC_000380	XLOC_007369	0.974853	0.510601	0.541835	0.373429	0.554186	0.38214	0.448797	0.431001	0.690414	0.712441	0.828384	0.903361
ENSMUST00000219444.1	ENSMUSG00000112117.1	13.5473	1.99714	3.06373	1.54653	2.09546	3.56314	3.09167	2.63186	2.6414	2.42728	2.0083	2.98008
LNC_005632	XLOC_115923	1.22731	0.485679	0.217896	0.520936	0.408892	0.319145	1.17827	0.599148	0.305986	0.728614	0.475335	0.985846
ENSMUST00000197856.1	ENSMUSG00000105202.1	0.429726	0.65016	0.396899	0.82082	0.49657	0.468733	0.475704	0.696397	0.480473	0.843011	0.521168	0.585442
LNC_006825	XLOC_141856	0	0	0	0	0	1.99953	0	0	0	0	0	0
LNC_003307	XLOC_068326	0.569834	0.28433	0.511649	0.307544	0.816189	0.419388	0.454058	0.698228	0.888347	0.140364	0.165097	0.748868
LNC_006164	XLOC_127516	0.287176	0.613058	0.497989	0.652368	0.372648	0.166206	0.301906	0.374999	0.507815	0.474547	0.575271	0.650324
LNC_001499	XLOC_030938	0.065118	0.233222	0.204326	0.374134	0.231906	0.194295	0.339951	0.224247	0.138785	0.244194	0.127231	0.382892
ENSMUST00000220671.1	ENSMUSG00000113831.1	3.7623	3.73119	4.49464	4.01235	3.80389	4.21175	4.05335	4.18812	3.27116	3.46403	4.07841	4.13605
ENSMUST00000226491.1	ENSMUSG00000115650.1	0.452136	2.46717	1.76593	1.89327	2.05769	1.70499	2.33055	2.26715	2.32741	2.59565	2.02398	2.58919
LNC_001055	XLOC_021341	0	0.074611	0.086847	0.170435	0.06787	0.159109	0.150664	0.071875	0.130029	0.073074	0.326143	0.19458
LNC_001340	XLOC_027337	0.47246	0.356782	0.720245	0.553018	0.482656	0.412035	0.090273	0.272942	0.240671	0.678905	0.548776	0.511919
LNC_005630	XLOC_115904	0.302283	0.227534	0.45795	0.342909	0.232916	0.22448	0.12279	0.094824	0.12983	0.463241	0.488803	0.225322
LNC_006438	XLOC_133255	0	0	0	0	0	0	0	0	0	0	0	0.353264
ENSMUST00000124865.1	ENSMUSG00000085242.1	0.299656	0.129111	0.43431	0.423355	0.36476	0.139691	0.250314	0.167714	0.08038	0.225579	0.115666	0.057878
LNC_005349	XLOC_109869	0.548427	0.380921	0.223159	0.492296	0.383067	0.439656	0.303436	0.273517	0.497867	0.517439	0.488094	0.707673
LNC_000336	XLOC_006759	0.365674	0.250723	0.460314	0.608255	0.471924	0.174219	0.360156	0.39562	0.558945	0.539276	0.436887	0.452255
LNC_000599	XLOC_012631	1.6337	0.018253	0.98196	0	0	0.760487	0.567593	1.22088	0	0	0.02821	0.821587
LNC_003957	XLOC_081714	0	0.216428	0.225159	0.10371	0	0	0	0	0	0	0.210332	0.325855
LNC_001345	XLOC_027394	0.1945	0.337345	0.405641	0.226628	0.203277	0.156337	0.1534	0.368672	0.362619	0.558345	0.591848	0.467467
ENSMUST00000209502.1	ENSMUSG00000110205.1	0.92013	0.305857	0.384153	0.235961	0.43461	0.534226	0.282219	0.448311	0.318661	0.268821	0.166893	0.275183
LNC_003050	XLOC_063456	0.024555	0.680103	0.102895	0	0.223563	0	0	0.320517	0	0	0	0
LNC_003922	XLOC_080614	0.384547	0.129453	0.233415	0.144425	0.088159	0	0	0.369271	0.247131	0	0.264236	0
LNC_000432	XLOC_008619	0	0.458423	0.226852	0	0.548888	0.224625	0.178681	0.301061	0.15709	0.279813	0.17964	0.26553
LNC_002363	XLOC_050243	0.008398	0.010764	0.35104	0	0.012014	0	0.026497	0	0	0	0.02838	0.016973
LNC_000401	XLOC_008096	0.122051	1.78792	0.555808	0.48586	1.31412	0.911773	0.672898	1.18471	0.493075	0.993645	0.280701	0.708882
LNC_004950	XLOC_101641	0.092958	0.056689	0.32588	0.291409	0.055513	0.374267	0.965058	0.7392	0.289439	0.079363	0.314833	1.63646
LNC_000621	XLOC_013230	0	0.13642	0.086263	0.136212	0.244044	0.157485	0	0.063367	0.353925	0.219079	0.093316	0.141278
LNC_005386	XLOC_110735	0.551827	0.502031	0.593873	0.286349	0.388559	0.352108	0.321517	0.32985	0.624385	0.473492	0.537943	0.734263
LNC_006756	XLOC_140589	1.37088	0.679082	1.09245	0.283023	0.969591	0.558459	0.550991	0.290968	0.77736	0.800441	1.24017	1.09222
LNC_004384	XLOC_090968	0.107679	0	0	0.122135	0.091185	0.048679	0.344346	0	0	0	0.088346	0.071481
ENSMUST00000203440.1	ENSMUSG00000108246.1	0.575889	0.789324	0.642319	0.711003	0.78815	0.67597	0.43991	0.62397	0.417034	0.548595	0.437809	0.541004
ENSMUST00000070085.5	ENSMUSG00000056145.5	11.8765	9.94674	7.92595	9.07141	9.69627	7.62965	8.37447	7.99308	7.38892	8.57367	6.90505	7.24189
LNC_000693	XLOC_015044	0.166798	0.181153	0.413961	0.211489	0.273743	0.225413	0.227226	0.291005	0.405194	0.312832	0.323017	0.472723
LNC_001724	XLOC_035866	1.13837	0.408049	0.431575	0.299305	0.317011	0.257095	0.302793	0.224205	0.411733	0.52424	0.498158	0.617183
LNC_005396	XLOC_110928	0.032108	0.159554	0.16391	0.058724	0.382342	0.029155	0	0.033303	0.004303	0.079282	0	0.049115
LNC_006073	XLOC_125966	0.080141	0	0	0.297081	0.148602	0	0	0	0.146008	0.427756	0.162358	0.143389
LNC_003527	XLOC_072379	0.110104	0	0.047609	0.389198	0.042689	0	0	0.030097	0	0	0	0
LNC_006191	XLOC_127923	0.617401	0.918854	0.757234	1.19237	0.720171	0.956976	0.757225	1.17995	1.03554	0.944568	0.772644	0.969617
LNC_003073	XLOC_063996	0	3.63414	0.51985	3.17663	1.43712	1.38412	0.523853	0.000572	0.003472	0.055643	0.002554	0.755379
LNC_000098	XLOC_001618	0.055118	0	0.346688	0	0	0	0.162551	0	0	0	0	0
ENSMUST00000221422.1	ENSMUSG00000113902.1	105.523	62.9815	86.8009	43.5116	87.106	80.445	86.2391	83.5494	82.2157	90.8019	97.2133	84.7309
LNC_006805	XLOC_141475	1.22807	0.806262	0	1.0066	0.727007	0.338878	0.666133	0.713584	0.72444	1.57882	1.12308	1.05747
ENSMUST00000194358.1	ENSMUSG00000103552.1	0.771701	0.866632	0.673209	0.87279	0.571452	0.433441	0.480709	0.452815	0.450458	0.647895	0.590998	0.769636
LNC_001717	XLOC_035534	2.92735	1.84844	2.64352	1.75479	2.35506	1.91336	1.56021	1.87594	2.90033	4.3573	2.39145	3.89868
LNC_004697	XLOC_096267	0.421214	0	0	0	0.123027	0	0	0.061938	0	0.133374	0	0
LNC_005428	XLOC_111632	0.512357	0.427592	0.357298	0.313454	0.301389	0.327381	0.350549	0.178092	0.19245	0.485677	0.476541	0.587999
LNC_003831	XLOC_078599	0.405244	0.336352	0.510503	0.350196	0.34391	0.283668	0.349763	0.256367	0.410618	0.456679	0.468745	0.364772
LNC_004792	XLOC_098643	0.270994	0	0.358703	0.187296	0.145994	0	0.130827	0.188901	0.007222	0.3147	0.518016	0.110772
LNC_001898	XLOC_039922	0.073709	0	0	0.207851	0.070301	0.143641	0.114809	0	0.066196	0.542599	0.110413	0.154202
ENSMUST00000153461.1	ENSMUSG00000086851.1	0.061366	0	0.411037	0.043839	0.079938	0.377074	0.069531	0.76328	0.062676	0.126637	0.048501	0.068308
ENSMUST00000181447.7	ENSMUSG00000097466.8	0.225132	0.011214	0.15411	0.005993	1.1363	0.521573	1.28817	0.553908	0.051181	0.146158	0.362332	0.125757
LNC_000722	XLOC_015602	0.626763	0.922575	0.680732	0.568438	0.653887	0.55845	0.625827	0.690743	1.62089	0.812268	1.14471	1.57532
LNC_005709	XLOC_117558	0.208853	0.589694	0.305817	0.327716	0.412505	0.510939	0.412302	0.634542	0.310291	0.289052	0.426517	0.400888
LNC_001808	XLOC_037869	0.413088	0.499201	0.463539	0.785472	0.331569	0.579001	0	0.497603	0.297136	0.571227	0.698553	0.440168
LNC_002865	XLOC_059816	0	0.248789	0.229332	0.149488	0.177892	0.208954	0.30677	0.034294	0.102243	0.375258	0.139192	0.179133
LNC_004677	XLOC_096027	0.215925	0.104499	0.106707	0.089882	0.130879	0.321576	0.106732	0.428292	0.286328	0.226361	0.300295	0.336087
LNC_001237	XLOC_024434	0.683683	0.831742	0.753506	0.739982	0.706729	0.868532	0.854737	0.646972	0.861669	0.984457	1.02137	0.787927
LNC_003142	XLOC_065015	0.593481	0.57914	0.447382	0.391354	0.386837	0.368247	0.327817	0.577372	0.526811	0.647275	0.593842	0.85046
ENSMUST00000180771.1	ENSMUSG00000096947.1	2.86185	6.57299	6.27411	5.03129	5.66607	4.96795	4.31119	4.00913	7.51372	9.95951	10.3041	8.86768
ENSMUST00000165350.7	ENSMUSG00000091509.7	4.1752	6.11727	6.08203	6.4356	6.12605	7.04278	5.82774	5.58793	4.91138	6.17469	5.31475	5.67346
ENSMUST00000158457	ENSMUSG00000089082	0	0.141923	0.076835	0.133357	0	0	0.059782	0	0.22685	0	0	0
LNC_000301	XLOC_005919	0.931603	0.491214	0.708946	0.520609	0.433387	0.302694	0.583619	0.275299	0.544133	0.348049	0.756092	0.886703
LNC_002446	XLOC_051883	0.407351	0.43186	0.450499	0.321077	0.281104	0.224889	0.176491	0.405081	0.357913	0.418628	0.596093	0.415982
LNC_000065	XLOC_001239	0.092642	0.065122	0.098542	0.100865	0.173743	0.080019	0	0.085921	0.248025	0.486409	0.21587	0.161401
LNC_001729	XLOC_036178	0.949548	0.135972	0.221718	0.188569	0.464145	0.297467	0.267566	0.25172	0.364999	0.737522	0.51063	0.502476
ENSMUST00000176807.2	ENSMUSG00000093436.6	1.27519	3.25943	2.33803	2.18114	3.24444	2.58179	2.83923	2.83518	3.05829	1.93117	3.0085	2.92143
LNC_002886	XLOC_060132	0.157199	0	0.34065	0	0	0	0	0	0	0	0	0
LNC_003333	XLOC_068589	0.417882	0.759628	0.835676	0.820158	0.359603	0.728343	0.514124	0.618675	0.752195	0.701989	0.722158	0.66652
ENSMUST00000083977	ENSMUSG00000065911	4056	447.48	412.002	543.968	7602.69	6296.6	1793	10069.6	5252.75	3827.14	1122.71	2791.28
LNC_004261	XLOC_087846	0.055724	0	0.187719	0.202436	0	0	0.076153	0	0.341754	0	0	0.077991
ENSMUST00000189331.1	ENSMUSG00000101014.1	0.114625	1.04825	0.956751	1.65683	1.30244	0.745114	1.25429	0.763758	1.95851	1.13483	0.729062	0.946126
ENSMUST00000206060.1	ENSMUSG00000108351.1	0.374868	0.808475	0.305901	0.732549	1.06149	0.462943	0.532288	0.354708	0.277241	0.386947	0.268023	0.441732
LNC_002357	XLOC_050165	0.240859	0.322625	0.209522	0.264593	0.457274	0.429966	0.20633	0.155615	0.490913	0.211099	0.469239	0.765689
LNC_001647	XLOC_033811	0	0	0	0.309101	0.335847	0	0	0	0	0	0	0.137817
LNC_001161	XLOC_023529	0.444331	0.408682	0.415991	0.510712	0.391908	0.284826	0.193925	0.320646	0.576628	0.619652	0.495064	0.494142
ENSMUST00000197430.1	ENSMUSG00000106139.1	0	0.223876	0.080149	0.190786	0.444291	0.036994	0.181893	0.202082	0.120127	0.183928	0.087497	0.232176
LNC_003518	XLOC_072255	0	0.05192	0	0.056109	0.339758	0.033057	0.025315	0	0.087717	0	0	0.102983
LNC_001878	XLOC_039402	0.545939	0.517375	0.777534	0.540307	0.611416	0.539024	0.590321	0.409631	0.980196	1.23105	1.06509	1.19815
LNC_003085	XLOC_064120	3.12919	2.68067	2.95797	2.73275	2.34705	2.29095	1.59963	2.11938	3.16111	4.08038	3.70188	3.81733
LNC_003181	XLOC_065808	0.253212	0.253736	0.295802	0.29562	0.155697	0.333406	0.153401	0.266969	0.440755	0.414765	0.488934	0.35623
LNC_001624	XLOC_033502	0	0	0	0.09929	0	0.356625	0	0	0	0.093471	0	0
LNC_006206	XLOC_128423	0.184177	0.207702	0.15027	0.394046	0.219502	0.155779	0.102838	0.188962	0.187736	0.426478	0.369106	0.531651
LNC_002025	XLOC_042983	0	0.098572	0	0	0.153177	0	0.162549	0	0	0.512529	0	0.061455
LNC_002993	XLOC_062549	0	0	0.687224	0.023838	0	0.109467	0.114782	0.135869	0.295268	0.18522	0.146603	0.239161
LNC_003438	XLOC_070742	0	0	0.393841	0	0	0	0	0.213676	0.06909	0.119579	0.037386	0
LNC_006589	XLOC_136852	0.08443	0	0.359231	0	0.423572	0	0	0	0.126374	0.275639	0.595267	0
LNC_002882	XLOC_060092	0.229876	0.377541	0.251204	0.210925	0.235282	0.322571	0.412363	0.576834	0.341648	0.406959	0.335238	0.565614
LNC_003384	XLOC_069741	0	0	0	0	0.08256	0	0	0	0	0	0	0.475708
ENSMUST00000125518.1	ENSMUSG00000085767.1	0.719389	1.40377	0.952224	1.19097	0.721608	1.36441	0.94803	0.696701	0.95992	0.940934	1.49684	1.07815
LNC_004513	XLOC_092978	0.233328	0.036151	0.194305	0.341766	0.132981	0.227093	0.04079	0.118359	0.04122	0.219919	0.394729	0.187467
LNC_004710	XLOC_096802	0.091276	0	0.287349	0.099378	0.075739	0.266811	0.389187	0	0	0	0	0
LNC_003155	XLOC_065416	0.560924	0.286893	0	0.240725	0.13803	0.249838	0.276688	0.153153	0.331996	0.338228	0.143701	0.260667
LNC_000727	XLOC_015641	0.182029	0.074138	0.165077	0.057086	0	0	0	0.080876	0.064972	0	0.050508	0.404485
LNC_003108	XLOC_064645	0.193401	0.208587	0.162469	0.779859	0.095363	0.12389	0.067994	0.213305	0.228885	0.329808	0.317055	0.2531
LNC_005483	XLOC_112739	0.031323	0.394811	0.737349	0.401051	0.918867	0.711095	0.437434	0.282813	0.550859	0.700253	0.558637	0.996952
LNC_004162	XLOC_086036	0	0	0	0	0	0	0	0	0	0	0.318444	0
ENSMUST00000208953.1	ENSMUSG00000109554.1	1.1939	0.953454	0.763353	0.72308	0.477489	0.928039	0.764601	0.640482	0.583017	0.764536	0.638295	0.723074
LNC_001556	XLOC_031638	0	0	0	0	0.392235	0	0	0	0	0	0	0
ENSMUST00000197656.1	ENSMUSG00000105970.1	0.61298	0.727467	0.694907	0.694287	0.485598	0.845233	0.541119	0.607887	0.625999	0.564779	0.501932	0.706201
LNC_005012	XLOC_102754	0	0.191076	0	0.104524	0	0	0.289754	0	0.244117	0.286266	0.128015	0
LNC_000128	XLOC_002321	0	0.09714	0.073397	0	0	0	0	0.295512	0.073358	0	0	0.088584
LNC_005689	XLOC_117169	0.08049	0.248648	0.085903	0.197837	0	0.294956	0.225977	0.106641	0.145962	0.243527	0.221786	0.462929
ENSMUST00000177363.1	ENSMUSG00000093656.1	2.49151	1.86719	2.4173	1.73934	2.12106	1.5023	1.39238	2.16391	2.18749	2.29708	2.21654	2.52477
LNC_001128	XLOC_023183	5.81929	6.5716	5.38528	6.9053	6.08591	4.10746	4.96892	4.56574	6.0636	7.75248	4.07395	6.82061
ENSMUST00000193142.1	ENSMUSG00000103334.1	0.450986	0.195242	0.353822	0.604276	0.522058	0.36147	0.286627	0.263833	0.269543	0.50414	0.373151	0.571107
ENSMUST00000223046.1	ENSMUSG00000113894.1	0.692512	0.744686	0.699471	0.960692	0.481134	0.637219	0.623947	0.55813	0.652385	0.842487	0.510885	0.709476
LNC_001275	XLOC_024989	0.298952	0.545618	0.692951	0.507251	0.59173	0.498028	0.341948	0.456716	0.715291	0.972036	0.949677	0.716333
ENSMUST00000192612.1	ENSMUSG00000103755.1	0.735178	0.565121	0.478832	0.559747	0.587616	0.724389	0.54332	0.418905	0.727332	0.574687	0.783347	0.651377
LNC_004345	XLOC_089938	0.033589	0.068708	0.250097	0.364728	0	0.098185	0	0.059138	0.06033	0.070511	0.166821	0.106161
LNC_001045	XLOC_021184	0.545508	0.325846	0.277384	0.365384	0.307704	0.20536	0.160626	0.354166	0.374165	0.40545	0.184316	0.199024
LNC_005760	XLOC_118784	0.204621	0.227233	0.142006	0.186607	0.117129	0.049927	0.192272	0.202784	0.159221	0.27521	0.457634	0.382337
LNC_003092	XLOC_064216	0.115422	0.216348	0.157559	0.404228	0.109981	0.016066	0.070306	0.210426	0.315265	0.39224	0.450797	0.309136
LNC_005521	XLOC_113553	0.513015	0.300774	0.039202	0.078111	0.124667	0.102703	0.227856	0.234028	0.224404	0.308689	0.06772	0.083012
ENSMUST00000193750.1	ENSMUSG00000103572.1	0.346545	0.5154	0.463764	0.470388	0.275885	0.556323	0.336369	0.400613	0.39175	0.599044	0.361569	0.449922
LNC_000878	XLOC_018816	0.106782	0.439319	0.60961	0.325296	0.047795	0.079786	0.141662	0.103638	0.36983	0.077662	0.482028	0.210764
LNC_000162	XLOC_003345	0	0.535972	0.08715	0.28968	0	0	0.340482	0	0	0.426579	0.515156	0.305796
LNC_000857	XLOC_018474	0	0	0	0.067978	0.335068	0	0	0	0	0	0	0.112863
LNC_002689	XLOC_056808	0	0.271768	0	0	0	0	0	0	0	0	0.314396	0
LNC_003010	XLOC_062805	0	0.36657	0	0	0	0	0.15267	0.058488	0.035087	0.163678	0.222526	0
LNC_005291	XLOC_108737	0.389293	0.430932	0.364596	0.96367	0.306489	0.518933	0.435385	0.450115	0.488831	0.678992	0.421019	0.440346
ENSMUST00000189404.1	ENSMUSG00000100213.1	3.18967	4.39911	3.2881	3.78268	3.13596	3.22554	3.22086	2.92519	2.8408	2.61725	2.81043	2.94119
LNC_005801	XLOC_120002	0.043384	0.268332	0.532608	0.735678	0.504262	0.580059	0.065489	0.601505	0.523889	0.174917	0.003354	0.088943
LNC_002233	XLOC_047732	0.643446	0.361574	0.438054	0.388313	0.35066	0.30402	0.210699	0.36505	0.421022	0.612888	0.504898	0.550064
LNC_000735	XLOC_015695	0.559812	0.593848	0.491724	0.613965	0.424892	0.632196	0.401826	0.384565	0.611628	1.30547	0.50686	1.24258
ENSMUST00000182590.1	ENSMUSG00000098024.1	0.56695	0.774285	0.843591	0.994623	0.709681	0.610672	0.637633	0.646757	1.00309	1.0458	1.52625	1.10653
LNC_002017	XLOC_042878	0.246539	0.311276	0.442072	0.542047	0.24206	0.296244	0.261038	0.231572	0.492078	0.273896	0.439345	0.384574
LNC_003920	XLOC_080571	0	0.356096	0.358033	0.196718	0.122644	0	0	0.137255	0	0	0	0
LNC_000442	XLOC_008814	5.08842	3.89924	5.05832	2.22816	4.25331	3.19664	3.04033	2.50962	4.99328	4.91244	5.10991	5.76122
LNC_000582	XLOC_012427	0.144041	0.445917	0.507407	0.401056	0.407694	0.241096	0.338882	0.320142	0.437114	0.382104	0.424165	0.588005
LNC_006794	XLOC_141044	0	0	0	0.384292	0	0	0.034877	0.195624	0	0	0	0
ENSMUST00000188936.1	ENSMUSG00000100706.6	0.107749	0.482146	0.417793	0.574417	0.401664	0.622865	0.679956	0.594264	0.5282	0.582044	0.540368	0.494893
LNC_001682	XLOC_034697	0.130878	0	0.330993	0.053693	0	0	0	0.346926	0	0.260833	0.838141	0
ENSMUST00000193336.1	ENSMUSG00000103827.1	0.631967	0.08113	0.819831	0.152632	0.393518	0.697944	0.642927	0	0.181194	0.713321	0.985036	0.488529
LNC_006054	XLOC_125599	0.036962	0.185773	0.32457	0.170602	0.168398	0.276538	0.197506	0.255893	0.350664	0.438345	0.357712	0.208825
LNC_000231	XLOC_004220	0.372869	0.490367	0.495398	0.666907	0.37397	0.413686	0.43916	0.364007	0.787058	0.693958	0.599485	0.835596
LNC_005854	XLOC_121176	0	0	0	0.156555	0	0	0	0	0.497951	0	0	0
LNC_003424	XLOC_070401	0.188984	0.06969	0.079088	0.081876	0.09494	0.201626	0.117882	0.271926	0.157131	0.334209	0.112648	0.09722
ENSMUST00000195473.1	ENSMUSG00000102461.1	0.111068	0.654427	0.314228	0.595039	0.418002	0.493752	0.330958	0.455388	0.31241	0.366034	0.407827	0.374716
LNC_004161	XLOC_086000	0.203708	0	0.187369	0	0.255399	0	0	0.10065	0	0	0	0.499564
LNC_000061	XLOC_001198	0.550741	0.518707	0.372632	0.442741	0.501618	0.547013	0.42094	0.452142	0.56635	0.660898	0.730131	0.620241
LNC_006488	XLOC_134541	0	0	0	0	0	0	0	0	0	0.330742	0	0
ENSMUST00000180546.1	ENSMUSG00000097441.1	0.872562	0.054136	0.117155	0.085391	0.22094	0.16017	0.054119	0.090809	0.112541	0.071693	0.153323	0.161117
ENSMUST00000211539.1	ENSMUSG00000109606.1	0.239797	0.285583	0.316113	0.428365	0.32959	0.302759	0.268726	0.211018	0.251535	0.410108	0.19892	0.369648
LNC_006135	XLOC_126894	0.071066	0.150367	0.07357	0	0.271803	0.17346	0.08366	0	0.128072	0.18773	0.177305	0.148922
ENSMUST00000159412.7	ENSMUSG00000087331.8	0.554126	0	0.072346	0.571245	0.07091	0.280435	0.649861	0.207882	0.248812	0	0.045678	0
LNC_004424	XLOC_091541	0.044369	0.114736	0.007035	0.050656	0.039039	0	0	0.169506	0.268151	0.043796	0.087176	0
LNC_005041	XLOC_103213	0	0.523914	0	0	0.054572	0	0	0	0	0	0	0
LNC_003460	XLOC_071115	0	0	0.122189	0	0	0	0	0	0.282045	0	0	0
ENSMUST00000199354.1	ENSMUSG00000105742.1	0.465068	0.937462	0.422724	0.748233	0.47409	0.660295	0.493206	0.45942	0.715852	0.524209	0.763317	0.804403
LNC_002277	XLOC_048878	0.074003	0	0	0	0	0	0.301863	0.130292	0	0.598016	0	0.058314
LNC_000611	XLOC_012930	0.040516	0	0	0	0	0	0	0.45212	0.11488	0.139425	0	0.171911
ENSMUST00000226647.1	ENSMUSG00000115624.1	0.942933	1.34309	0.961342	1.23734	0.990259	1.23823	1.22168	1.11889	0.926175	1.31062	0.950203	1.26403
LNC_003684	XLOC_075860	0	0	0	0	0.076362	0.312047	0	0.073288	0.106999	0	0	0
LNC_000339	XLOC_006775	0	0.318267	0.236393	0.556382	0	0.20048	0	0.097759	0.224373	0.379916	0	0
ENSMUST00000181190.2	ENSMUSG00000097908.7	0.023901	0.025927	0.019591	0.010064	0.012875	0.02301	0.001326	0.013081	0.004528	0.000919	0.000276	0.002947
ENSMUST00000182303.1	ENSMUSG00000097970.1	1.11728	1.10967	1.04945	1.74425	1.49512	1.78628	1.79803	0.933288	1.06164	1.72083	1.20594	1.39366
LNC_003820	XLOC_078503	0	0	0.333463	0.09636	0	0	0	0	0	0	0	0
LNC_001751	XLOC_036571	0	0.148658	0.132186	0.180562	0.062934	0.199739	0.105506	0	0.384985	0	0	0.058208
ENSMUST00000224276.1	ENSMUSG00000114241.1	0.100043	0.072239	0.186576	0.051828	0.394038	0.105277	0.347196	0.325334	0.164815	0.258787	0.267981	0.454048
ENSMUST00000142109.7	ENSMUSG00000087620.7	1.99763	1.54186	1.44969	1.78442	1.59987	1.41184	1.65677	1.50077	1.40353	1.71059	1.78294	1.65385
LNC_006119	XLOC_126658	0.100767	0.185995	0.464467	0.458378	0.064072	0.235044	0.18621	0.18456	0.531117	0.483433	0.309045	0.464598
LNC_005907	XLOC_122582	0.780377	0.46744	0.481614	0.105731	0.443443	0.25044	0.272724	0.591775	0.223419	0.793284	1.12012	0.919648
LNC_005071	XLOC_103906	0.665794	0.472373	0.313288	0.784922	0.131034	0.285972	0.325467	0.060674	0.275856	0.367519	0.345292	0.431847
LNC_001783	XLOC_037306	0	0.048197	0	0.052204	0	0	0	0	0.290954	0	0	0.124659
LNC_000562	XLOC_012048	1.57256	0.625685	0.820234	1.00286	0.613963	0.405218	0.405924	0.642206	0.916719	0.55586	1.03876	1.11417
ENSMUST00000183966.7	ENSMUSG00000098912.7	9.167	1.71356	4.86189	8.69305	7.62129	8.23857	4.48727	8.41797	4.38517	6.3127	4.39372	4.9077
LNC_002182	XLOC_046989	0.640842	0.809737	0.603799	0.528702	0.624026	0.57969	0.539115	0.63299	0.787389	0.702215	0.733398	0.713305
LNC_006012	XLOC_124685	0.398723	0.511172	0.426277	0.229902	0.482252	0.427874	0.263646	0.338306	0.552137	0.667706	0.33201	0.690212
ENSMUST00000187286.1	ENSMUSG00000100851.1	0.553965	3.26439	1.07688	1.11221	2.27587	1.98896	1.71132	2.91612	1.15729	1.5531	1.10868	1.32756
ENSMUST00000162890.1	ENSMUSG00000089889.2	3.59606	1.29938	1.46871	2.34569	2.36193	2.87407	1.52899	1.95754	1.85902	2.67428	2.77993	1.51839
ENSMUST00000177896.7	ENSMUSG00000079179.9	1.36776	1.15869	1.0482	0.848847	1.05316	0.73875	1.00383	1.00963	1.0045	0.91273	0.967729	0.67839
ENSMUST00000211162.1	ENSMUSG00000109992.1	0.066844	0.25265	0.741301	0.241736	0.273948	0.207327	0.182511	0.314418	0.681406	0.24146	0.32344	0.189428
LNC_000165	XLOC_003374	0.132173	1.15306	0.085025	0.206538	0.066697	0.480181	0.112751	0.059281	0.020159	0.950316	0.09526	0.511629
LNC_001550	XLOC_031627	1.03075	0.787729	0.70657	1.09654	0.722233	1.1811	0.900421	1.03383	0.141996	0.755607	0.217244	0.203187
LNC_003658	XLOC_075281	0.245286	0.341227	0.352019	0.133841	0.36825	0.41883	0.497596	0.624992	0.363653	0.383947	0.308835	0.431738
ENSMUST00000211525.1	ENSMUSG00000110273.1	0.450371	0.383742	0.071822	0.260649	0	0.060239	0.175138	0.140331	0.071085	0.448158	0.2194	0.147836
LNC_005243	XLOC_107890	0	0	0.223315	0	0	0.052008	0.160827	0.093035	0.283136	0.112423	0.581001	0
LNC_000031	XLOC_000643	1.82848	1.9218	1.27405	2.52001	1.38718	1.27874	1.45366	1.12919	2.11185	2.50644	2.18101	1.84245
LNC_006669	XLOC_138481	0	0.473632	0	0	0.173686	0	0	0	0	0	0.174582	0.069888
LNC_003719	XLOC_076422	1.93237	1.60002	1.14875	0.863442	1.81367	0.771805	1.08854	1.33075	1.48063	1.91341	2.52116	2.46742
LNC_004810	XLOC_098963	0.300857	0.444602	0.200477	0.65465	0.367518	0.379953	0.367723	0.525639	0.693536	0.796124	0.661501	0.703895
LNC_001581	XLOC_032469	0.264251	0	0.1588	0	0.077959	0.052082	0	0	0.054184	0	0.338242	0.115003
LNC_003315	XLOC_068409	0.666081	0.683734	0.505576	0.904942	0.470113	0.438844	0.616031	0.57857	0.979822	0.953127	0.647702	0.835019
LNC_002791	XLOC_058572	0.334679	0	0	0	0	0	0	0	0	0	0	0
ENSMUST00000204452.1	ENSMUSG00000108168.1	0.310316	0.795892	0.455582	0.951255	0.31148	0.441265	0.426376	0.572931	0.489867	0.541616	0.543004	0.578287
ENSMUST00000214634.1	ENSMUSG00000111080.1	29.2452	19.8075	22.6495	19.3014	22.1659	22.9883	22.8095	21.1039	19.3122	19.3591	20.359	21.0212
LNC_006550	XLOC_135812	0.26117	0.185833	0.313337	0.372042	0.402055	0.354502	0.250302	0.310259	0.412938	0.51241	0.433317	0.337625
ENSMUST00000180841.1	ENSMUSG00000097345.1	0.274687	0.360063	0.46907	0.293069	0.287619	0.259884	0.334434	0.251166	0.311209	0.368379	0.189148	0.535265
LNC_003420	XLOC_070281	0	0.042247	0.129771	0.422399	0.10741	0	0	0.055669	0.038494	0.166873	0.088354	0.097626
LNC_000228	XLOC_004190	0.834855	0.994853	1.00772	0.881144	0.520117	0.831777	0.560947	0.905776	1.03205	1.19359	1.25338	1.19181
LNC_002492	XLOC_052765	0.421269	0.295319	0	0	0	0.39273	0	0	0.145797	0	0.164577	0.095243
LNC_003758	XLOC_077349	0.55549	0.599947	0.716303	0.844083	0.36529	0.440909	0.498712	0.429851	0.981749	0.969908	1.12218	1.04697
ENSMUST00000180639.2	ENSMUSG00000097915.2	0.71716	3.53573	4.52388	2.59371	4.41261	3.98922	3.12373	4.26693	5.21338	3.87541	5.00603	4.72909
LNC_001825	XLOC_038176	0.25826	0.472637	0.428083	0.392757	0.383732	0.286138	0.328348	0.433634	0.68529	0.738489	0.471186	0.640219
LNC_001622	XLOC_033474	0	0.354485	0	0	0	0	0	0	0	0	0	0
LNC_002052	XLOC_043521	0	0	0	0.56701	0	0	0	0	0	0	0	0
LNC_004449	XLOC_091775	0.210576	0.409371	0.144041	0.269352	0.150996	0.160738	0.073529	0.122209	0.047477	0.159809	0.19158	0.200237
LNC_003046	XLOC_063400	0.043471	0.13821	0.149149	0.349805	0.079414	0.13423	0.048949	0.040424	0.183928	0.328049	0.176313	0.14394
LNC_002205	XLOC_047245	0.494326	0	0.250812	0	0.107929	0.389795	0.201638	0	0	0.683444	0.36827	0.279277
LNC_000858	XLOC_018480	0.028787	0.530252	0.711551	0.604311	0.638419	0.707926	0.681173	0.595034	0.559665	0.526429	0.51013	0.562164
LNC_000337	XLOC_006774	0.31949	0.34066	0.180768	0.328454	0.163869	0.161275	0	0.11277	0.193132	0.268082	0.300692	0.570263
LNC_003339	XLOC_068696	0.331411	0.220259	0.245155	0.262199	0.122576	0.157469	0.261452	0.245755	0.238985	0.185798	0.611284	0.491025
LNC_002054	XLOC_043546	0	0	0	0	0.321034	0	0	0	0	0	0	0
ENSMUST00000201125.3	ENSMUSG00000006638.14	0.99694	1.50693	1.27766	1.23658	1.09973	1.21586	1.16603	1.4521	1.36536	2.08926	1.46205	1.54555
LNC_004523	XLOC_093243	0.455577	0.235525	0.286383	0.195113	0.048603	0.026263	0.318862	0.159105	0.226384	0.375309	0.048854	0.322492
LNC_002704	XLOC_057183	0	0.417581	0.055418	0.123313	0	0	0.070474	0	0.120005	0	0	0.347125
ENSMUST00000152157.7	ENSMUSG00000087380.7	1.4491	1.01721	0.917706	1.9418	1.87448	1.54128	0.881739	1.45022	1.462	1.31411	2.05986	1.45271
ENSMUST00000229779.1	ENSMUSG00000044471.12	1.25379	1.64573	0.949812	0.688713	1.01597	1.39142	1.09168	1.29522	1.24642	1.21786	0.987377	1.23518
LNC_006051	XLOC_125560	0	0.22073	0.002124	0.147069	0	0.329101	0.199538	0.188582	0	0.250789	0.647358	0.252627
LNC_004972	XLOC_102122	0	0	0	0	0.296501	0.125707	0	0	0	0.120588	0	0
ENSMUST00000128176.1	ENSMUSG00000085566.1	3.01281	5.37587	5.07899	5.10369	4.94855	5.00798	5.55044	5.12585	5.27107	5.66872	5.34472	5.56632
LNC_000240	XLOC_004474	0	0	1.29392	1.04982	0.896715	0.71928	0.919379	0	0.623027	0	1.23817	0
LNC_004640	XLOC_095523	0.39959	0.42945	0.626712	0.215489	0.150835	0.315029	0.266217	0.290941	0.289406	0.108273	0.271434	0.391855
LNC_002140	XLOC_046389	6.15581	6.14837	5.31652	2.11912	4.72431	3.05164	4.2577	4.29548	6.65296	5.39088	6.85567	4.41011
ENSMUST00000217447.1	ENSMUSG00000111443.1	0.046225	0.209655	0.269079	0.751232	0.158999	0.169717	0.257571	0.245023	0.248331	0.348743	0.217608	0.288095
LNC_000347	XLOC_006914	0	0	0	0	0	0	0	0	0.446889	0.131285	0	0
LNC_000835	XLOC_017691	0.18166	0.1676	0.193229	0.494459	0	0.011734	0	0	0.163143	0.095655	0.237769	0.141565
ENSMUST00000209370.1	ENSMUSG00000109648.1	0.273875	0.583085	0.241505	0.383936	0.410044	0.307647	0.284133	0.332152	0.181434	0.331255	0.30335	0.186109
LNC_002503	XLOC_053010	0.089496	0.769074	0.143123	0.234952	0.780628	0.669877	0.15789	0.429178	0.28761	0.989435	0.699863	0.365976
ENSMUST00000218845.1	ENSMUSG00000112483.1	0.557363	0.387523	0.301359	0.47645	0.262674	0.387393	0.326218	0.445757	0.393197	0.290954	0.284991	0.537989
LNC_004784	XLOC_098512	0.432606	0.362333	0.3615	0.548353	0.014831	0.260453	0.319193	0.397129	0.601076	0.671194	0.589088	0.553139
LNC_005920	XLOC_122853	0.29746	0.504287	0.425749	0.413003	0.353213	0.225175	0.246991	0.285124	0.562293	0.481721	0.388024	0.678777
LNC_004646	XLOC_095589	0	0	0	0	0.337446	0	0	0.10382	0.105913	0	0	0.112775
ENSMUST00000232628	ENSMUSG00000116739	0.79793	0.4942	0.461238	0.585765	0.292242	0.136307	0.412216	0.320336	1.06958	0.255924	0.441893	0.48629
LNC_003070	XLOC_063988	0.948475	0.687368	0.483444	0.530298	0.362801	0.255627	0.623369	0.721205	0.67149	0.487029	0.71832	1.20509
LNC_006327	XLOC_131432	0.267147	0.270867	0.281063	0.262138	0.218864	0.374967	0.186165	0.375527	0.428152	0.296201	0.28359	0.185997
LNC_005339	XLOC_109675	0	0.158557	0.082238	0.275775	0.091929	0.086507	0.164552	0.272244	0.260375	0.081286	0.435622	0.388994
LNC_002635	XLOC_055929	0.254696	0.215273	0.154177	0.456764	0.080503	0.324641	0.328913	0.128728	0.296059	0.240157	0.313331	0.232147
ENSMUST00000123548.1	ENSMUSG00000086606.1	7.5103	3.77418	3.58662	2.60841	3.5827	5.52751	4.30524	5.62552	3.81218	2.53325	2.80947	4.72324
LNC_001034	XLOC_020903	0.523193	0.99775	0.796537	1.32437	0.09751	0.694888	0.343669	0.833951	0.986333	0.948891	0.822387	0.679231
LNC_003174	XLOC_065635	1.39997	0.493636	0.037201	0.071441	0.968677	0.833362	0.067752	0.483844	1.32639	1.04685	2.37637	0.962957
LNC_006396	XLOC_132708	0.4392	0	0	0	0.200101	0	0.400271	0.470551	0	0	0.254887	0
ENSMUST00000155949.1	ENSMUSG00000079499.9	1.52391	3.21267	2.99337	4.59487	2.42265	2.5872	2.50916	2.48158	2.50648	2.59829	2.54923	2.61423
LNC_006662	XLOC_138444	0.272157	0.03587	0	0.222235	0	0	0	0	0.366012	0.151308	0.067947	0
LNC_000584	XLOC_012445	0	0	0.385516	0.098651	0	0	0	0	0	0	0	0
LNC_002435	XLOC_051669	0.367797	0	0	0	0	0	0	0	0	0	0	0
LNC_003749	XLOC_077213	0.066815	0	0	0	0	0	0.172833	0.294095	0	0	0	0
ENSMUST00000181619.1	ENSMUSG00000097032.2	0.913571	1.0064	0.601786	0.472506	0.633255	1.04625	0.775965	0.645086	0.821049	0.719001	0.737269	0.282973
LNC_006758	XLOC_140657	19.3622	9.79866	13.8639	7.88146	12.3611	10.382	11.3293	9.97747	13.7647	20.6472	16.5888	18.8802
LNC_005248	XLOC_108018	0.181713	0.44238	0	0	0	0	0.224361	0.086371	0	0.074519	0	0.220164
LNC_001486	XLOC_030725	0.275845	0.117512	0.40878	0	0	0	0	0.114274	0	0.232939	0.028144	0
LNC_004825	XLOC_099556	0.13987	0.538989	0.69023	0.912488	0.731938	0.109028	0.622225	0.24626	0.474488	0.841774	0.39017	0.434043
LNC_004086	XLOC_084105	0	0	0	0	0	0	0	0	0	0	0	0.334991
LNC_005133	XLOC_105512	0.024502	0.047365	0.066492	0	0.175089	0.085934	0.115793	0	0	0.350375	0.168654	0.034317
LNC_006769	XLOC_140922	0.873659	0.785699	0.994727	0.726205	0.531672	0.676426	0.763975	0.689658	1.11679	1.3432	1.05045	1.2869
LNC_005290	XLOC_108721	0.073152	0	0.069053	0	0.091891	0.056635	0	0	0.30608	0	0	0
ENSMUST00000128919.1	ENSMUSG00000085058.2	0.202108	0.280475	0.172549	0.229639	0	0.282925	0.44523	0	0.413728	0.300305	0.273029	0.643088
ENSMUST00000181406.1	ENSMUSG00000097428.1	1.77088	0.999432	1.14153	0.910421	0.939367	1.21207	1.22389	0.997425	1.20696	1.39239	1.19661	1.39763
LNC_003297	XLOC_068062	2.29085	2.58876	2.79599	2.47196	2.42249	2.10964	1.96496	1.81049	2.89431	3.05804	3.45639	2.96855
LNC_005232	XLOC_107633	0.211172	0.641797	0.449744	0.281692	0.399899	0.455794	0	0.015665	0.506057	0.453701	0.22024	0.47823
LNC_005569	XLOC_114370	0.247388	0.248964	0.394715	0.259619	0.23595	0.25752	0.219461	0.242825	0.332023	0.521152	0.561491	0.422518
ENSMUST00000206155.1	ENSMUSG00000108414.1	12.4621	9.86982	12.3066	6.55738	9.63691	9.24127	10.1865	10.8452	9.69727	9.85905	10.7517	10.1319
ENSMUST00000140501.1	ENSMUSG00000087698.1	0.436296	0.854773	1.01383	0.503155	0.865345	1.00086	0.819469	0.7606	1.28913	0.911742	0.94634	0.956055
LNC_004114	XLOC_085065	1.0122	0.56963	0.661627	0.169588	0.517984	0.493256	0.249055	0.132682	0.629252	0.123302	0.311101	0.285129
LNC_006832	XLOC_141949	0.359954	0.173156	0.28232	2.08323	0.063075	0.111144	0.138623	0.316288	0.802778	0	0.064269	0.091924
LNC_005377	XLOC_110502	0.443119	0.450023	0.226557	0.353051	0.235619	0.237651	0.162506	0.345291	0.273686	0.400117	0.344641	0.397231
LNC_003274	XLOC_067280	1.92139	0.800684	1.2935	0.818916	0.773233	1.59887	1.39058	1.29645	2.50445	1.75104	2.12272	2.1973
ENSMUST00000222417.1	ENSMUSG00000112959.1	1.7257	1.74803	2.12719	0.799187	1.65908	1.13916	0.99689	0.946483	1.31974	1.45402	1.47413	1.70861
LNC_000647	XLOC_013923	0.198538	0.58424	0.535523	0.084835	0.412871	0.426393	0.272668	0.719427	0.865876	1.13888	0.414741	0.248196
ENSMUST00000213677.1	ENSMUSG00000111828.1	0.296035	0.678932	0.755385	0.326353	0.280893	0.463624	0.46206	0.434788	0.347301	0.386219	0.448559	0.242013
ENSMUST00000174738.1	ENSMUSG00000092405.1	0.33838	0.791465	0.938209	0.910611	0.78037	0.42056	0.301604	0.491133	0.623906	1.05071	0.578779	0.356491
LNC_004429	XLOC_091584	1.79144	0.056515	0	0	0.03545	0.031689	0.014617	0.024512	0.07502	0.009753	0	0.071476
LNC_004782	XLOC_098481	0	0	0.151852	0.481607	0.075544	0.123646	0.101451	0.26113	0.083763	0.10023	0.095044	0.115924
ENSMUST00000192914.1	ENSMUSG00000104140.1	0.501502	0.693394	0.333597	1.03231	0.546837	0.55027	0.63405	0.665201	0.764794	0.876086	0.480698	0.641804
LNC_002731	XLOC_057643	0.478672	0	0	0.101625	0	0	0	0	0	0	0	0
ENSMUST00000180638.2	ENSMUSG00000097503.2	0.899004	0.445774	0.777542	0.549624	0.463389	0.590746	0.303075	0.448818	0.809328	0.897589	0.642174	0.547156
LNC_002598	XLOC_055203	0.525225	0.536496	0.654886	0.385396	0.808266	0.559745	0.437526	0.971149	0.729554	0.970113	1.17222	0.71407
LNC_001445	XLOC_030011	0	0.491952	0	0.781031	0.479608	0.434581	0	0.623225	0.445177	0.916905	0.849931	0.867093
LNC_000800	XLOC_016995	0.64041	0.825479	0.870488	0.543695	0.519925	0.580826	0.68438	0.46082	0.849233	1.11849	0.85633	0.747694
LNC_000631	XLOC_013443	0	0.448176	0.13559	0	0	0.248495	0.068738	0	0	0	0	0
LNC_000400	XLOC_008096	0.118974	1.73845	0.571508	0.513577	1.32882	1.10709	0.608692	1.37651	0.639847	0.897699	0.338688	0.635727
LNC_006198	XLOC_128181	0	0	0.031249	0.144156	0	0	0	0	0	0	0.57075	0
LNC_003098	XLOC_064401	0.00267	0.442391	0.401551	0.207388	0.38745	0.135437	0.32853	0.319017	0	0.360582	0.491427	0.132881
LNC_000546	XLOC_011500	0	0	0	0	0.323579	0	0	0.065755	0	0	0.175047	0
ENSMUST00000201771.1	ENSMUSG00000106702.1	0.408682	0.368193	0.682442	1.1346	0.930142	0.370733	0.342729	0.272522	0.68686	0.843571	0.840543	0.589658
ENSMUST00000147620.7	ENSMUSG00000075555.12	0.436495	0.22202	0.494004	0.439173	0.433332	0.392873	0.229958	0.24725	0.274129	0.266559	0.193622	0.612809
LNC_005102	XLOC_104549	0	0	0	0	0	0.152006	0	0	0	0	0	0.380971
LNC_002158	XLOC_046588	0.372736	0	0	0	0	0.121062	0.132441	0	0	0	0	0
LNC_006094	XLOC_126195	0.436026	0	0	0	0	0	0	0	0	0	0	0
ENSMUST00000181913.1	ENSMUSG00000097712.1	0.61463	0.529483	0.394925	0.771832	0.223643	0.306338	0.394971	0.405823	0.479731	0.558558	0.384282	0.458128
LNC_000286	XLOC_005489	0.340196	0	0	0	0	0	0	0	0	0	0	0
ENSMUST00000199398.1	ENSMUSG00000105489.1	0.568507	1.13911	0.801771	0.847197	1.0794	1.02007	0.979068	0.836508	1.48358	1.28759	1.32608	1.08991
LNC_006229	XLOC_128914	0.023752	0.029987	0.161443	0	0.41874	0.143693	0.117849	0.208112	0.508327	0	0.351202	0.105979
ENSMUST00000187345.6	ENSMUSG00000074415.13	0.319697	0.585281	0.341709	0.287554	0.58397	0.468861	0.161635	0.464678	0.13979	0.383189	0.266911	0.428667
LNC_004882	XLOC_100326	0.331691	0	0	0.439377	0.118633	0	0.194758	0.30562	0.156205	0	0	0
LNC_003571	XLOC_073419	0.286038	0.417217	0.487662	0	0.35917	0.322781	0.454	0.166627	0.74698	0.623299	0.772077	0.65551
LNC_000567	XLOC_012149	0	0	0	0	0	0	0	0	0	0	0.419878	0
LNC_003745	XLOC_077048	0.135979	0	0.069856	0	0	0.02599	0.03935	0.050116	0.340572	0.114683	0.188746	0.259024
LNC_005295	XLOC_108818	0	0	0	0	0	0	0.228022	0	0.14344	0.450553	0	0.551735
LNC_000655	XLOC_014214	0.659071	0.562745	0.632324	0.662315	0.503088	0.646836	0.422684	0.569292	0.735176	0.676942	0.61515	0.542736
LNC_005390	XLOC_110799	0.111358	0	0.069233	0.383745	0.093105	0.10051	0	0.016341	0.004009	0.148475	0	0
LNC_001382	XLOC_028416	0.261185	0.410371	0.470471	0.294361	0.338061	0.312066	0.157246	0.303189	0.329211	0.345142	0.350921	0.597758
LNC_006130	XLOC_126856	0.34082	0	0	0	0	0	0	0	0	0	0	0
ENSMUST00000187351.1	ENSMUSG00000099587.1	3911.53	3237.6	3637.84	1874.05	4067.54	3503.71	3262.78	3610.38	3092	3508.52	3637.11	3772.66
LNC_004032	XLOC_083024	0	0	0	0	0	0	0.351998	0	0	0	0	0
LNC_001759	XLOC_036760	0	0	0	0	2.2e-05	0	0	0	0	0.297637	0.015465	1.76899
LNC_000075	XLOC_001355	0.488081	0.56536	0.215276	0.367496	0.423734	0.198523	0.525584	0	0.807638	0.428065	0.781764	0.530434
LNC_002927	XLOC_061189	0	0.053217	0	0	0	0.434785	0	0	0	0	0	0
LNC_004874	XLOC_100284	0	0	0.115369	0	0.049169	0	0.180455	0	0.140771	0	0.076765	0.057423
LNC_000051	XLOC_000869	0	0	0.383815	0.338832	0.161572	0.221338	0.199871	0	0.127648	0.313213	0	0
LNC_004210	XLOC_086783	0	0.187359	0.182642	0.275158	0	0.135909	0.180088	0.160477	0.380343	0.342266	0.222501	0.576866
LNC_005383	XLOC_110719	0.359878	0.26564	0.200294	0.278337	0.063871	0	0	0.22122	0.185661	0.171525	0.318065	0.162574
ENSMUST00000157828	ENSMUSG00000088453	0.342918	0.22942	0.37009	0.187769	0.509243	0.429386	0.734813	0.744983	0.306163	0.211718	0.601791	0.103309
ENSMUST00000143016.1	ENSMUSG00000086920.1	0.281411	0.433646	0.477811	0.248453	0.37245	0.327255	0.238478	0.318961	0.280135	0.260839	0.168107	0.675152
LNC_004327	XLOC_089653	1.83748	1.14479	2.12593	1.46127	1.54356	1.40576	1.63273	1.57278	1.8731	2.26633	2.61556	3.25439
LNC_003186	XLOC_066024	0.401181	0	0.085346	0	0.076527	0	0	0	0	0	0	0
ENSMUST00000197852.1	ENSMUSG00000105218.4	0.114379	1.02504	0.916727	0.284377	0.510203	0.372995	0.503261	0.779993	0.23699	1.38992	0.298496	0.639089
LNC_000146	XLOC_002899	0.701033	0.516584	0.670267	0.525888	0.5327	0.48256	0.398795	0.470602	0.565639	0.75451	0.919644	0.738669
ENSMUST00000180923.1	ENSMUSG00000097318.1	1.57872	0.606073	0.295752	0.919427	1.00446	0.841332	0.345997	0.567094	0.566306	1.11211	0.759929	0.753629
LNC_004979	XLOC_102227	0.075856	0	0.270261	0	0	0.22006	0.053014	0	0.149815	0	0.680785	0
LNC_001684	XLOC_034709	0	0	0	0	0.152395	0	0	0	0	0	0	0.195808
ENSMUST00000223300.1	ENSMUSG00000113679.1	0.761688	0.514277	0.77957	0.789142	0.653434	0.79035	0.675627	0.795378	0.676919	0.61694	0.617353	0.944109
LNC_001007	XLOC_020549	1.25261	0.906844	1.43889	1.19387	1.26313	1.06046	0.91806	0.979327	1.16378	1.57804	1.74317	1.81716
ENSMUST00000155997.1	ENSMUSG00000087040.1	0	0.098667	0	0	0	0	0	0	0.118362	0.041028	0	0.241768
LNC_000696	XLOC_015093	0	0.335543	0.168975	0.115562	0.202468	0	0.113142	0	0	0.222815	0	0.177504
LNC_002315	XLOC_049426	0.468287	0.433597	0.423847	0.396908	0.421112	0.515295	0.470207	0.388562	0.600603	0.719362	0.40731	0.541977
LNC_003901	XLOC_079925	0.144064	0.121547	0.436878	0.156909	0.22268	0.093585	0.336659	0.030099	0.399421	0.362982	0.21235	0.312561
LNC_004913	XLOC_100994	0.573514	0.568181	0.469948	0.619461	0.502167	0.574713	0.612274	0.494042	0.590019	0.575249	0.64839	0.676973
LNC_001166	XLOC_023551	0	0.096436	0	0.137967	0.061486	0.041089	0	0.051225	0	0.114061	0	0.339875
LNC_006214	XLOC_128716	0.309578	0	0.183374	0.150926	0.159115	0	0.178932	0.138383	0.030891	0	0	0.116228
LNC_004466	XLOC_091915	0.086545	0	0	0.266446	0	0.051126	0	0	0.376996	0.050748	0.371682	0.532364
LNC_005641	XLOC_116166	1.41631	2.10741	3.08948	1.66048	2.88283	2.00516	2.31616	2.1406	1.6442	3.82191	1.89371	3.45262
ENSMUST00000213573.1	ENSMUSG00000111325.1	0.610577	0.405322	0.316593	0.389156	0.335759	0.371454	0.471048	0.379047	0.457943	0.425137	0.493414	0.605738
ENSMUST00000207651.1	ENSMUSG00000109337.1	0.237644	0.318605	0.600191	0.587285	0.181937	0.473261	0.220426	0.058563	0.18067	0.129144	0.399002	0.819938
LNC_002441	XLOC_051776	0.135582	0.339032	0.125092	0.095936	0	0.162938	0.0224	0.286894	0.115003	0.347935	0.128118	0.344284
LNC_001710	XLOC_035347	0	0.256856	0	0	0	0.341799	0	0	0	0	0	0
LNC_001120	XLOC_023116	0	0.196977	0.485281	0.327249	0.372078	0.001226	1.1e-05	0.5385	0.520126	0.353316	0.089243	0.472075
LNC_006730	XLOC_139786	0.056032	0	0.297408	0.122011	0	0	0.058844	0	0.201283	0.111309	0.083934	0.160398
LNC_004963	XLOC_101933	0.036255	0	0	0.46137	0	0	0	0	0.093449	0	0.111437	0.057624
LNC_005986	XLOC_124196	0.183181	0.234415	0.102371	0.235066	0.182973	0.231105	0.100196	0.047163	0.134661	0.435218	0	0.399597
LNC_001236	XLOC_024409	0	0.080304	0	0	0	0.30418	0	0	0.093453	0	0.467631	0.088167
LNC_003323	XLOC_068549	0.728781	0	0.374823	0	0	0.001191	0	0	0	0	0	0
LNC_005921	XLOC_122868	0	0	0	0.431504	0	0	0	0	0	0	0	0
LNC_004003	XLOC_082426	0.433033	0.664162	0.889643	1.01987	0.958657	0.82281	0.312042	0.643122	0.924784	1.58555	1.12258	0.82977
ENSMUST00000127786.2	ENSMUSG00000086503.3	16.5761	20.9364	16.8735	47.6934	19.4562	19.7261	20.566	20.112	19.1028	20.5133	16.8502	18.5689
LNC_003211	XLOC_066423	0	0.176145	0	0	0	0	0.072286	0	0	0.369085	0.256658	0
LNC_003306	XLOC_068303	0.386328	0	0.205123	0.103926	0	0	0	0	0	0	0	0
LNC_003683	XLOC_075795	0.196587	0.247189	0.331775	0.18003	0.186447	0.254704	0.225221	0.061784	0.273898	0.872238	0.374522	0.396277
ENSMUST00000152663.7	ENSMUSG00000086968.8	0.23497	2.71217	13.0917	2.69275	12.4637	1.47227	14.9384	14.2491	13.7637	0.638475	0.690241	14.5417
LNC_005359	XLOC_110141	0.184818	0.075702	0.190198	0.202234	0.08858	0.271481	0.098999	0	0.083407	0.194963	0.092747	0.100386
LNC_003515	XLOC_072228	0.066634	0.087146	0	0.17748	0.080738	0.081646	0	0	0	0	0.411542	0
ENSMUST00000163781.1	ENSMUSG00000091050.1	1.07843	0.983947	1.09896	0.764287	0.776519	1.21916	0.835173	0.810399	0.931111	1.21145	1.01908	0.831131
ENSMUST00000182265.2	ENSMUSG00000098066.2	1.26753	1.92803	1.5363	1.72311	1.474	1.30724	1.61361	1.47564	1.34751	1.47145	1.54392	1.61809
LNC_003473	XLOC_071335	0.105239	0.039498	0.251682	0.168272	0	0.047391	0.054798	0.091722	0.047065	0.109352	0.367835	0.055041
LNC_000479	XLOC_009462	0.538218	0.238226	0.154659	0.077811	0.21934	0.222348	0.172899	0.063928	0.321367	0.351248	0.314601	0.277395
LNC_006167	XLOC_127520	0.271216	0.340387	0.616471	0.353769	0.38238	0.267932	0.272381	0.252593	0.182514	0.517598	0.367207	0.336778
LNC_004249	XLOC_087606	0.249606	0.154813	0.202406	0.168237	0.130473	0.09852	0.316409	0.127138	0.519011	0.460966	0.449688	0.303688
ENSMUST00000092680.2	ENSMUSG00000069713.2	0.6782	0.437759	0.463774	0.596866	0.614892	0.632291	0.308564	0.54859	0.600119	0.676033	0.668773	0.513848
ENSMUST00000127424.7	ENSMUSG00000087059.7	0.347789	0.626962	0.8236	1.84368	0.358683	0.588635	0.936953	0.42373	1.60084	1.07351	0.923803	0.93512
LNC_003876	XLOC_079292	0.367134	0	0	0.27344	0.186896	0.150663	0.116595	0.406049	0.528026	0.710135	0.55385	0.394163
ENSMUST00000215803.1	ENSMUSG00000111082.1	0.136746	0.531004	0.285201	0.165923	0.049644	0.044266	0.214647	0.067598	0.179012	0.24834	0.397328	0.120107
ENSMUST00000070956.3	ENSMUSG00000056687.9	0.661293	0.502812	0.508626	0.201488	0.359171	0.402026	0.397191	0.380921	0.318046	0.597955	0.341379	0.349708
LNC_001912	XLOC_040245	0.34421	0	0.20112	0.241092	0.302578	0.276246	0.202451	0.143921	0.185	0.331983	0	0.414474
LNC_000354	XLOC_007027	2.62583	1.05292	1.54277	1.90947	1.61373	1.58837	1.13243	1.26773	2.2049	2.41069	2.68376	2.35158
LNC_002035	XLOC_043185	0	0.368763	0.063124	0	0.072188	0	0.125673	0	0	0	0	0
LNC_005598	XLOC_115246	0.325634	0.425673	0.497658	0.26067	0.22518	0.171707	0.275078	0.321352	0.321326	0.418777	0.437545	0.430729
ENSMUST00000204323.1	ENSMUSG00000107997.1	0.521476	1.03247	1.13217	0.929924	0.62074	0.90912	0.640348	0.618465	1.01952	0.915321	0.842585	1.18711
ENSMUST00000148496.1	ENSMUSG00000086468.1	0.537666	0.226207	0.732812	0.370836	0.250012	0.49093	0.344567	0.199402	0.542508	0.260064	0.76062	0.107619
LNC_004426	XLOC_091558	0.393413	0.412249	0.179344	0.367141	0.428649	0.273625	0.239635	0.395309	0.580104	0.739451	0.471078	0.525371
LNC_006469	XLOC_134359	0.176021	0.274144	0.3785	0.077484	0.336671	0	0.128107	0.148063	0.289101	0.111367	0.110114	0.147148
LNC_001211	XLOC_024003	0.198534	0.070961	0.050826	0	0	0.065575	0	0	0.41925	0	0.067208	0
LNC_005433	XLOC_111721	0.140594	0	0.172556	0	0.463657	0	0	0	0.154673	0.066629	0.447129	0.124956
LNC_006664	XLOC_138478	0.322439	0.273736	0.132894	0.407741	0.273583	0.159255	0.154991	0.348275	0.349566	0.364715	0.394078	0.540621
LNC_000204	XLOC_003957	0	0.330206	0	0	0.100076	0	0	0	0	0.075671	0.067804	0.079676
LNC_003138	XLOC_064983	0.119011	0.027294	0	0	0	0	0	0	0	0	0.041822	0
LNC_003530	XLOC_072422	0	0.387828	0	0	0.175405	0	0.130692	0.215864	0	0.06303	0	0
LNC_003742	XLOC_076916	0.225128	0.329452	0	0	0	0.172339	0.094469	0.1127	0.144323	0.256879	0	0
LNC_000876	XLOC_018811	0.180491	0.209684	0.324887	0.432078	0.159284	0.154288	0.123823	0.328217	0.31263	0.13017	0.288958	0.517602
LNC_002711	XLOC_057251	0.121465	0.12393	0.285465	0.097371	0.120056	0.101219	0.088534	0.00933	0.152682	0.092312	0	0.070767
LNC_002625	XLOC_055761	0.402439	0.060752	0.171379	0.432883	0.583035	0.005722	0.165824	0.467754	0.03995	0.859288	0.619678	0.694773
ENSMUST00000221978.1	ENSMUSG00000113067.1	0.238895	0.123005	0.186517	0.52864	0.155356	0.145157	0.210936	0.160933	0.373256	0.157423	0.081983	0.315374
LNC_001262	XLOC_024851	1.26272	0.464378	0.396871	0.351044	0.287814	0	0.466715	0.669651	0.472491	0.367975	0.344569	0.507274
LNC_001314	XLOC_026498	0	0	0	0	0	0	0.093422	0.285578	0.234949	0	0	0
ENSMUST00000217704.1	ENSMUSG00000112369.1	0.121178	0.443691	0.210142	0.374277	0.150139	0.201373	0.22521	0.192201	0.348102	0.359129	0.22948	0.354035
LNC_005166	XLOC_106215	0.432896	0.108026	0.217953	0.269272	0.195593	0.316311	0.082044	0.168485	0.230406	0.431938	0.40976	0.024415
LNC_005068	XLOC_103776	0.061561	0.074896	0.279051	0	0.185854	0.172566	0.091183	0	0.184994	0.141382	0.461075	0.231681
LNC_006640	XLOC_138116	0.335729	0.108171	0	0	0	0	0	0	0	0	0	0
LNC_002098	XLOC_044799	0.271163	0.270449	0.491045	0.44712	0.241147	0.272383	0.223714	0.309274	0.51377	0.316771	0.543566	0.394714
LNC_001610	XLOC_033294	0.15609	0	0.205301	0	0.099249	0.101393	0.110924	0	0	0	0.415326	0
LNC_005181	XLOC_106462	0	0.07504	0.438555	0.153935	0.247073	0	0.082043	0.333298	0.08607	0.748484	0.169148	0.219854
LNC_001766	XLOC_036796	0.32954	0	0.157907	0.145546	0.03054	0.555462	0	0.001543	0.523508	0.219466	0	0.684597
LNC_004598	XLOC_094902	0.390207	0.159625	0.129468	0.053149	0.211236	0.259074	0.207452	0.256842	0.357301	0.683925	0.482788	0.527822
ENSMUST00000151091.1	ENSMUSG00000085548.1	0.114803	0	0	0.600502	0.039369	0.058	0.048387	0	0	0.032932	0.0979	0.036234
ENSMUST00000207847.1	ENSMUSG00000109279.1	0.746986	0.699576	0.917353	0.783572	0.331582	0.748378	0.543622	0.598279	0.635252	0.570083	0.643449	0.794939
ENSMUST00000126926.1	ENSMUSG00000074466.12	1.6503	0.842675	0.534239	1.02784	0.587093	1.18891	1.2918	0.848827	1.28663	0.717922	1.05561	1.26544
LNC_001618	XLOC_033440	0.35649	0.702337	0	0	0	0.552045	0	0	0	0	0	0
LNC_002933	XLOC_061388	0	0	0	0	0	0	0	0	0	0	0.493473	0
LNC_004445	XLOC_091756	1.51327	0.690442	0.879598	0.836951	0.625829	0.750131	0.894071	0.62851	0.894548	1.16554	1.21069	1.12332
LNC_006824	XLOC_141851	0.059213	0.148575	0.140059	0.412783	0	0	0	0.019547	0.369926	0.561902	0	0.147573
LNC_001873	XLOC_039279	0.192293	0.050493	0	0	0.119948	0.230024	0.169709	0.126347	0.288912	0.135382	0.056182	0.327754
LNC_005724	XLOC_117881	0.542196	0.447029	1.12477	0.015747	0.062404	0.908985	0.307469	0.868342	1.17118	0.55128	0.182105	0.497377
LNC_004738	XLOC_097294	0.513137	0.117014	0	0.106959	0	0.145772	0	0.272528	0.039193	0	0	0.282611
LNC_002319	XLOC_049492	0	0.125642	0	0.040701	0	0	0.439333	0	0	0	0	0
ENSMUST00000221942.1	ENSMUSG00000097157.2	0	0	0.138587	0	0.067888	0.260169	0	0.150457	0	0	0	0
LNC_002271	XLOC_048612	0.196222	0.156579	0.625428	0.363218	0.243321	0.354205	0.225381	0.270238	0.496153	0.30211	0.231256	0.1601
LNC_004415	XLOC_091447	0	0	0.334876	0	0	0.14571	0.256168	0.037284	0	0	0.187066	0
LNC_005783	XLOC_119590	1.8881	1.72626	1.6604	2.23112	1.49384	1.46992	1.25206	1.50462	2.06078	2.18229	1.9892	1.86065
LNC_005423	XLOC_111553	0.171864	0.120965	1.36889	0.012247	0	0	0	0	0.025307	0.115992	0.188805	0.162002
ENSMUST00000181209.1	ENSMUSG00000097207.7	0.61101	0.33431	0.399401	0.396774	0.297989	0.318958	0.340764	0.233248	0.257185	0.303099	0.180441	0.18204
LNC_002976	XLOC_062192	1.65617	0.577253	0.593395	1.22682	0.390765	0.738028	0.930198	0.724938	0.746056	0.730212	0.43245	0.414127
LNC_006624	XLOC_137688	0.226775	0.334817	0	0	0.329502	0.453886	0.295964	0.173328	0.134033	0.404721	0.199743	0.205671
LNC_006833	XLOC_141951	0.377321	0.449694	0.145277	2.80443	0.151107	0.576675	0.229834	0.35866	0.922436	0	0.641954	0.134102
LNC_006510	XLOC_134922	13.9256	3.41691	4.94457	4.89084	3.74792	3.69601	7.48687	4.42397	9.10451	9.19414	12.0024	8.66393
LNC_001667	XLOC_034395	0.458376	0.530453	0.535122	0.45518	0.369573	0.312132	0.515363	0.341724	0.372661	0.522436	0.37922	0.593186
ENSMUST00000194889.1	ENSMUSG00000102417.1	1.3283	2.65272	2.39253	2.98452	1.77267	2.923	2.35343	1.84177	2.0309	3.51929	2.26198	2.7219
LNC_004493	XLOC_092571	0.499415	0.323611	0.243746	0.74218	0.767645	0.654329	0.816111	0.608929	0.88827	1.12617	1.3738	1.31149
LNC_001251	XLOC_024651	0.05612	0.108803	0	0	0.052463	0.227593	0	0.172324	0.062604	0.418096	0	0
ENSMUST00000180722.1	ENSMUSG00000097131.1	0.753502	0.563735	0.581515	0.436182	0.439544	0.432221	0.539177	0.402299	0.488227	0.373887	0.658657	0.579955
LNC_005491	XLOC_113097	0.310095	0	0	0.067524	0	0	0	0	0	0.044001	0	0
LNC_006437	XLOC_133253	0.072885	0.192255	0.307774	0	0	0.285019	0.194621	0.152628	0.228986	0.415618	0.43501	0.114741
ENSMUST00000192735.1	ENSMUSG00000102573.1	1.00055	0.890939	0.912021	1.41668	0.896892	1.00923	1.08781	1.00787	0.910028	1.21477	0.67633	0.808804
ENSMUST00000169175.1	ENSMUSG00000090785.1	0.068304	0.357777	0.514063	0.476153	0.213324	0.370432	0.250484	0.31254	0.224765	0.557204	0.418361	0.541205
ENSMUST00000191863.1	ENSMUSG00000104462.1	0.023808	0.387326	0.290629	0.323052	0.246804	0.294561	0.252842	0.254945	0.161361	0.176601	0.297109	0.504331
ENSMUST00000137643.1	ENSMUSG00000073627.7	0.233837	0.329523	0.40422	0.333846	0.327521	0.267326	0.303857	0.302189	0.257172	0.452674	0.236191	0.303202
ENSMUST00000214037.1	ENSMUSG00000111394.1	2.5082	2.4844	2.65795	2.08458	1.78528	2.70803	1.88191	1.96755	2.41139	2.37673	1.74172	2.24166
LNC_002050	XLOC_043516	0	0	0.250246	0	0.194425	0	0	0	0.083065	0.44627	0	0
LNC_002589	XLOC_055054	0.65437	1.57024	1.9679	1.30332	1.72662	1.64519	1.75558	1.86139	2.38663	2.33883	1.96662	1.48993
LNC_003923	XLOC_080620	0	0.110706	0	0	0.051805	0.36786	0	0.065847	0	0.079518	0	0.078982
LNC_001697	XLOC_035003	0.152086	0.268776	0.715917	0.554607	0.208281	0.26413	0	0.148986	0.27761	0.200286	0.431882	0.272096
LNC_000209	XLOC_004062	0.417531	0.051337	0.037073	0.241233	0.061683	0.123297	0.255601	0.054831	0	0	0	0.231763
ENSMUST00000221808.1	ENSMUSG00000113298.1	0	0.25306	0	0.338235	0	0	0	0	0	0.713107	0	0.349023
LNC_001949	XLOC_041427	0	0	0.245369	0	0	0.180178	0	0.18416	0.065463	0.621823	0.003529	0.090999
LNC_005845	XLOC_121075	0.545205	0.070854	0.23308	0.081056	0.271005	0.286775	0.469536	0.370159	0.253836	0.17615	0.274026	0.376377
ENSMUST00000219233.1	ENSMUSG00000111977.1	12.2846	16.4412	14.4993	12.2301	14.1742	11.9433	11.9562	12.8828	10.7471	12.2133	9.89011	10.7004
LNC_003788	XLOC_077738	5.2151	6.53901	0	0	0	0.361142	0	6.15547	0.213112	4.1845	0.402798	0.185735
LNC_002526	XLOC_053467	0	0	0.400381	0	0	0.257595	0	0	0.51721	0	0	0.063415
LNC_001412	XLOC_029000	0.374621	0.948954	0.712029	0.356462	0.357599	0.456733	0	0.426571	0.330538	0.84569	0.224529	0.191351
LNC_004099	XLOC_084463	0	0	0.140908	0.470311	0	0	0.252231	0	0	0	0.143794	0
LNC_000293	XLOC_005806	0.498247	0.097328	0.155196	0.297545	0.185363	0.118444	0.12975	0.19097	0.249747	0.26401	0.176985	0.279092
LNC_005622	XLOC_115781	0.100133	0.211162	0.315271	0.03634	0.095504	0	0	0	0.269779	0.189626	0.099997	0.418965
LNC_001387	XLOC_028455	0.677386	0.410206	0.588035	0.515829	0.336249	0.333226	0.463007	0.867767	0.385287	0.282468	1.30984	1.23913
LNC_002120	XLOC_045983	0.173791	0.32345	0.160968	0	0.170969	0.122489	0	0.186296	0.248648	0.242473	0.099442	0.267993
LNC_006771	XLOC_140944	0.332728	0	0.481306	0.000169	0.027934	0.177107	0.123954	0.244146	0.584808	0.187889	0.050199	0.713277
LNC_005458	XLOC_112453	0	0.130989	0	0	0	0.001238	0	0	0.534624	0.427303	0.000233	0.634379
ENSMUST00000185815.1	ENSMUSG00000100826.6	13.328	13.7416	9.65072	11.3262	9.73504	14.6657	9.05151	12.2491	14.4514	10.2531	9.74107	13.399
LNC_002456	XLOC_052214	0.089274	0	0.138865	0	0	0.17963	0	0.054083	0.342823	0.029506	0.038777	0
LNC_003977	XLOC_081951	0.879184	1.12069	1.49802	1.10816	1.12341	0.526956	1.11777	0.993655	1.58478	0.96699	1.68222	1.49051
LNC_000174	XLOC_003499	0	0	0	0.061	0.235384	0	0	0	0	0	0.361442	0.398134
LNC_004328	XLOC_089653	1.05313	0	0	0	0	0	0	0	0	0	0	0
LNC_006348	XLOC_131847	0	0	0	0	0.111794	0	0	0.29903	0	0	0	0
ENSMUST00000227609.1	ENSMUSG00000115471.1	3.02271	3.63679	2.7968	3.31276	2.58665	2.90998	2.91468	3.25703	2.7336	2.8548	2.13581	3.44779
LNC_001228	XLOC_024276	0	0	0	0	0.210198	0	0.129881	0.07795	0.12868	0	0	0.334381
ENSMUST00000218355.1	ENSMUSG00000112806.1	0.767391	1.02794	0.694856	0.968348	0.489014	0.757928	0.57421	0.631975	0.742171	0.618332	0.437702	0.577318
LNC_003651	XLOC_075249	0.94149	1.05699	0.970723	0.960431	0.79982	0.845191	0.718686	0.852148	1.04002	1.40357	1.10255	1.13396
ENSMUST00000159706.7	ENSMUSG00000053332.13	80.9784	62.3953	88.1946	31.6755	73.3739	77.2961	64.6332	69.7328	83.5598	81.1082	83.0787	77.2975
ENSMUST00000181220.1	ENSMUSG00000097613.1	0.918684	0.76409	0.548608	0.562143	0.572842	0.93767	0.698116	0.37709	0.393271	0.613454	0.578386	0.656363
ENSMUST00000181433.7	ENSMUSG00000097881.7	1.38174	0.628379	1.17252	0.939195	0.983781	1.1035	0.740268	0.820293	0.717006	1.19479	1.00287	0.896897
LNC_003410	XLOC_070145	0.315445	0.444368	0.383209	0.258813	0.225731	0.165693	0.517293	0.168585	0.206562	0.328931	0.111674	0.448257
LNC_002238	XLOC_047943	0	0	0.195791	0.186695	0.234238	0.122703	0.095979	0.124396	0.447475	0.292994	0.594419	0.416911
ENSMUST00000181973.1	ENSMUSG00000097131.1	1.55364	0.80415	0.896195	0.698495	0.81483	0.993619	1.16413	1.16775	0.707654	1.15305	0.971485	1.07628
ENSMUST00000146049.1	ENSMUSG00000087524.1	0	1.79154	2.03811	1.3729	1.60863	1.23449	2.32849	2.12851	1.89596	2.29796	1.85684	2.14586
LNC_006700	XLOC_139375	0.2995	0.44592	0.275286	0.330324	0.179644	0.27357	0.317457	0.235867	0.379047	0.382252	0.565784	0.523074
LNC_005206	XLOC_107083	0.6125	1.15564	0.020014	1.00323	0.722671	0.434397	0.448868	0.054489	0.024973	0.877463	0.598701	0.00725
LNC_006093	XLOC_126169	0	0	0	0.534539	0.37513	0	0.308773	0	0	0.418806	0	0
ENSMUST00000186234.1	ENSMUSG00000052629.5	1.24812	1.7841	2.00934	1.81574	2.01854	1.85768	1.83538	1.95218	2.01732	2.50979	1.81349	2.0852
LNC_000053	XLOC_001010	0	0	0	0.069488	0.082682	0.061304	0	0	0	0.11612	0	0.410076
ENSMUST00000182075.7	ENSMUSG00000097039.8	2.02955	3.26276	3.28328	2.76798	2.36452	2.65148	2.8693	3.93532	3.87323	2.29251	2.63996	3.09111
ENSMUST00000193207.1	ENSMUSG00000102225.1	0.756136	1.00563	0.91999	1.05539	0.570513	0.960633	0.766924	0.570814	0.812004	0.9078	0.551057	0.941772
ENSMUST00000192689.1	ENSMUSG00000102602.1	1.17438	1.4701	1.27849	1.66615	0.810987	1.52992	1.29789	1.24906	1.22786	1.4503	0.862177	1.29971
LNC_001451	XLOC_030133	0.009292	0	0	0	0	0	0	0.066497	0.00668	0	0	0.012237
LNC_000506	XLOC_010466	0	0.295558	0.25827	0.264358	0.30826	0.078862	0.086274	0.071249	0.143675	0.511412	0.198561	0.528279
LNC_000609	XLOC_012897	0	0	0.107924	0.326183	0	0	0	0	0	0.251565	0.405294	0.376055
LNC_004152	XLOC_085892	0.051019	0.055719	0.05621	0	0.050401	0	0.140824	0.04652	0.094915	0.333724	0.052772	0.076679
ENSMUST00000210217.1	ENSMUSG00000110256.1	0.365398	0.464825	0.425029	0.264056	0.204953	0.302202	0.252278	0.321475	0.549397	0.446948	0.4959	0.415806
LNC_001471	XLOC_030514	0.46631	0.06665	0.247867	0.338466	0.219825	0	0.248534	0.222978	0.290353	0.244996	0.262072	0
ENSMUST00000181719.1	ENSMUSG00000097736.8	1.44551	2.85053	2.22733	2.80481	1.33081	2.0317	2.03583	1.6534	2.4691	3.17772	2.34444	2.57176
LNC_005596	XLOC_115237	0.336333	0.563372	0.442913	0.425915	0.291844	0.358278	0.258207	0.133123	0.256792	0.349128	0.395127	0.386245
ENSMUST00000219810.1	ENSMUSG00000112756.1	0.20356	1.3321	0.709048	1.27428	0.71109	0.906235	0.570338	0.675533	0.652455	0.704917	0.576553	0.829988
LNC_006367	XLOC_132162	1.13363	0.386775	1.48396	1.03995	0.475145	0.70898	0.484667	0.984376	0.676812	1.08856	0.889029	0.691178
ENSMUST00000181515.1	ENSMUSG00000097638.1	0.665677	0.372735	0.375862	0.375659	0.495321	0.329161	0.223486	0.456754	0.278498	0.253372	0.182419	0.374902
ENSMUST00000208993.1	ENSMUSG00000109118.1	0.628824	0.296221	0.873082	0.193366	0.194416	1.05192	1.11382	0.683928	0.717993	0.795667	0.719364	1.18037
LNC_006699	XLOC_139371	0	0	0	0.127592	0	0.063184	0.119091	0.103165	0.190143	0.493255	0	0.122584
LNC_004909	XLOC_100825	0.475314	0.307792	0.088399	0.050972	0.081605	0.201354	0.126719	0.078488	0.28256	0.248927	0.068335	0.185901
ENSMUST00000193040.2	ENSMUSG00000104002.2	0.684835	0.737404	0.97303	1.01182	0.773969	0.656594	0.74078	0.648112	1.01236	1.11296	1.35125	1.15989
ENSMUST00000206829.1	ENSMUSG00000108616.1	1.88907	6.62332	4.37563	5.57774	5.49931	4.84347	5.13783	4.9688	4.58164	4.15433	3.82465	4.45312
LNC_005182	XLOC_106472	0.334082	0.225439	0.16668	0.429378	0.239167	0.157865	0	0.267152	0.268501	0.695182	0.244618	0.301913
LNC_000381	XLOC_007370	0.360608	0.167236	0.192833	0	0	0	0	0.20571	0.507638	0.259865	0	0.189629
LNC_002781	XLOC_058488	1.18669	1.053	1.08624	0.759071	1.02056	0.841746	0.751359	0.721306	1.3602	1.2253	1.67318	1.84571
ENSMUST00000190080.6	ENSMUSG00000064043.13	0.946667	3.39876	1.66352	4.54182	2.38749	1.45185	2.02116	2.38815	2.26294	1.76127	1.68931	1.5547
LNC_001012	XLOC_020589	0	0	0	0	0	0.396242	0.25743	0	0	0	0.176745	0
LNC_000238	XLOC_004462	0.101087	0.566051	0	0.272003	0	0	0.115451	0.095345	0.097267	0	0	0
LNC_004807	XLOC_098956	0	0.281446	0	0.328638	0.281186	0.462408	0.139221	0.316809	0.173338	0.130217	0.399444	0.090842
LNC_000577	XLOC_012307	0.233065	0.87898	0.534927	0.470612	0.676068	0.666817	0.196443	0.379157	0.830165	0.80638	0.580251	0.501061
LNC_000159	XLOC_003219	0.476561	0.130499	0.121768	0.126823	0.177162	0.107382	0.29026	0.376573	0.06987	0.040967	0.038588	0.234989
LNC_002629	XLOC_055840	0.567796	0.862881	0.737403	1.16401	1.05786	1.00339	0.846856	0.68702	2.29854	1.99573	1.30862	1.52068
LNC_000853	XLOC_018289	0.90118	0.375671	0.913216	0.429451	0.639612	0.753451	0.476905	0.446682	0.417095	0.45043	1.03391	1.08631
LNC_004120	XLOC_085215	0.08073	0	0	0	0	0.052751	0.445576	0	0	0	0	0
LNC_004081	XLOC_083959	0	0.271506	0	0.079307	0.208423	0.297387	0.157234	0.152936	0	0.324874	0.18513	0.715463
LNC_001282	XLOC_025121	1.31841	1.54223	1.1666	0	1.25038	0.67019	0.658702	1.23461	1.36671	0	1.39239	0.009761
LNC_002879	XLOC_060039	0	0	0	0	0	0	0	0.331453	0	0	0	0
LNC_002490	XLOC_052706	0	0.595833	1.07244	1.16091	0.883546	0.833768	0.542006	0.742679	1.46226	2.1191	1.23923	1.07396
LNC_003648	XLOC_075073	15.0997	12.4045	13.9226	12.8321	14.4615	12.3526	11.5269	12.0825	15.4067	17.6676	16.8565	16.7362
ENSMUST00000211380.1	ENSMUSG00000080058.2	16.0865	20.69	16.9248	21.8188	16.4729	13.0778	13.537	14.0093	18.73	15.8768	16.3823	16.369
LNC_000402	XLOC_008105	0.110412	1.96619	0.600008	0.505877	1.40244	0.946504	0.749283	1.34963	0.571782	0.994212	0.264607	0.781423
ENSMUST00000172531.1	ENSMUSG00000092203.7	0.27149	0.592505	1.24981	0.916379	0.416448	0.495102	0.648921	0.881007	0.780845	0.782453	0.666449	0.697142
LNC_005309	XLOC_109105	0.040823	0.151792	0.042989	0.516818	0	0.075368	0.104397	0.124175	0.11903	0	0	0.160062
ENSMUST00000198543.1	ENSMUSG00000105900.1	0	0.373053	0.032056	0.259159	0.199424	0.120797	0.089676	0.179959	0.171793	0.017707	0.093719	0.266178
LNC_004835	XLOC_099682	0.146647	0.136059	0.334144	0.109764	0.19	0.28379	0.090693	0.088051	0.391022	0.501683	0.409503	0.09286
LNC_006834	XLOC_141951	0.108287	0.042409	0	1.53172	0	0.173047	0	0.289634	0.251242	0	0	0.038247
LNC_000882	XLOC_018865	0	0.155288	0	0	0.269466	0	0	0.144466	0.32391	0.22347	0	0
LNC_000186	XLOC_003731	0	0.04113	0	0.123948	0.094569	0	0	0	0	0.303345	0	0.112759
LNC_004198	XLOC_086460	1.31411	0	0	0	0	0	0	0	0.265486	0.207203	0.786258	0.206149
LNC_005626	XLOC_115809	1.44404	1.39681	1.47736	1.67063	1.15925	1.04583	1.23465	1.29891	1.46792	1.98418	1.57576	1.58021
LNC_005565	XLOC_114296	0	0	0	0	0	0	0	0	0	0	0.341924	0
LNC_002076	XLOC_044274	0	0.030128	0.314648	0.351682	1.85435	0.951958	0.468366	0.357964	0.027687	0.145137	0.032312	0
LNC_001153	XLOC_023395	2.14947	1.46847	2.19215	1.78295	2.02593	1.69653	1.09406	1.45294	2.63062	3.15093	2.9752	2.54203
LNC_003500	XLOC_071953	0.038497	0.121774	0.282136	0.250085	0.32727	0.073895	0	0.067779	0.069146	0.140663	0	0.161074
ENSMUST00000201715.1	ENSMUSG00000107000.1	0.690211	0.472707	0.600443	1.19754	0.330453	0.497254	0.411563	0.540335	0.565279	0.676449	0.516439	0.582003
LNC_006494	XLOC_134669	0	0	1.70974	0	0	0	0	0	0	0	0	0
LNC_001880	XLOC_039419	0	0	0	0	0	0	0	0.280314	0	0	0	0
LNC_000376	XLOC_007298	0.297372	0.500918	0.517677	0.4609	0.308721	0.265123	0.132753	0.346344	0.503698	0.506457	0.306639	0.435405
ENSMUST00000190666.1	ENSMUSG00000100826.6	5.92176	5.67318	4.06749	3.67483	3.59112	4.4604	4.39329	4.61597	4.1273	4.64768	3.89113	4.84143
LNC_003295	XLOC_068034	0	0.120985	0	0.023801	0	0.138736	0.150373	0.341847	0.269692	0.252641	0.122557	0.26583
LNC_000269	XLOC_004852	0.703641	0.094768	0.381982	0.39142	0.312696	0.160553	0.159676	0.315077	0.362954	0.188358	0.388839	0.562306
ENSMUST00000210436.1	ENSMUSG00000110272.1	0	0.141964	0.020596	0.184339	0.128843	0.111444	0.192479	0	0.120915	0	0	0.141305
LNC_002159	XLOC_046592	0	0.033787	0	0.07773	0	0.085411	0	0	0.32391	0	0	0.06486
LNC_006710	XLOC_139650	0.145857	0	0	0	0.443482	0	0	0	0	0	0	0
LNC_001017	XLOC_020672	0.576174	0.224449	0.490404	0	0.355295	0.083956	0	0	0.137862	0.120624	0.334195	0
LNC_004463	XLOC_091910	0.386671	0.597425	0.356565	0.545883	0.661579	0.526447	0.393938	0.392397	0.436745	0.665996	0.519019	0.51718
LNC_003577	XLOC_073518	1.46803	1.42285	1.34172	1.49312	1.37504	0.728842	0.913094	0.840821	1.37416	1.38341	1.52285	1.5697
ENSMUST00000181086.1	ENSMUSG00000097541.1	0.457716	0.415361	0.306083	0.28465	0.388252	0.153083	0.13693	0.167506	0.229016	0.489434	0.45756	0.341228
LNC_003329	XLOC_068562	0.225101	0	0.284686	0	0	0.102978	0.33807	0.202411	0	0.116754	0.079358	0
LNC_001545	XLOC_031617	1.18085	1.37555	1.71058	1.61385	1.21107	1.26145	1.16278	1.22274	1.84093	2.10325	2.02294	1.98583
LNC_005223	XLOC_107437	7.45134	7.69879	10.0407	8.22372	9.77657	7.16865	6.59361	8.08652	11.1163	12.7123	12.7631	10.6758
LNC_004469	XLOC_091993	0.090601	0.070055	0.230187	0	0.1376	0	0.278864	0.127003	0.452826	0.379582	0.756143	0.226363
LNC_004029	XLOC_082989	0.033083	0.044411	0	0.085239	0	0.156454	0.172108	0	0.151305	0.354562	0.168248	0.196498
ENSMUST00000136990.2	ENSMUSG00000087095.2	0.217931	0.590042	0.930338	1.00283	0.660553	0.87103	1.04856	0.822716	0.912012	0.989746	1.13722	0.908541
LNC_005216	XLOC_107298	0.344668	0.363859	0.293153	0.226287	0.219356	0	0	0.107243	0.382383	0.609394	0.113775	0.241369
ENSMUST00000143871.7	ENSMUSG00000084950.7	0.410142	1.17147	1.98713	1.27738	0.520919	0.744429	0.667614	1.37939	0.121357	0.77741	0.828146	0.868885
LNC_003362	XLOC_069311	0	0.047331	0.135908	0	0	0	0	0.039689	0.32391	0	0.094356	0
ENSMUST00000180682.1	ENSMUSG00000097743.1	1.65863	1.26537	1.28747	0.98508	0.798664	0.959599	1.15489	1.16507	1.30232	1.10161	1.48186	1.42343
ENSMUST00000125001.8	ENSMUSG00000063235.16	6.2529	4.98487	6.58193	5.41327	5.86233	5.92138	5.63829	6.45907	5.11064	5.75558	6.01985	5.78485
LNC_000469	XLOC_009218	1.29257	0.94831	0.823177	1.4406	1.08769	0.790868	0.812399	0.874263	1.47024	1.53726	1.42274	1.7419
LNC_004500	XLOC_092712	0.218986	0.24327	0	0	0.093656	0	0	0.343098	0.213443	0.107989	0.257739	0.254061
LNC_006512	XLOC_134931	0.42483	0.033021	0.100492	0.071398	0.16366	0.113688	0.034951	0.086593	0.143453	0.306943	0.098231	0.13719
LNC_000211	XLOC_004112	0	0	0	0	0	0	0	0.571237	0	0	0	0
LNC_006274	XLOC_130305	0	0	0	0	0	0	0	0.035311	0.311801	0	0	0
LNC_003982	XLOC_081988	0.91507	0.790496	1.10743	0.936687	0.850797	0.440883	0.267913	0.701842	1.0001	1.10015	1.41821	1.32816
LNC_001927	XLOC_040548	0.240345	0.448275	0.422443	0.339411	0.39259	0.335894	0.218809	0.295921	0.405062	0.453222	0.632247	0.523016
ENSMUST00000199296.1	ENSMUSG00000105601.1	0.248903	0.471891	0.292211	0.418583	0.244094	0.320191	0.20324	0.343672	0.326891	0.34719	0.323298	0.291682
LNC_003189	XLOC_066061	0.246404	1.40479	1.39062	1.40595	1.22469	0.79588	0.856129	0.948727	1.60255	1.7951	1.51559	1.59716
LNC_005268	XLOC_108361	0	0	0.369748	0	0	0	0	0	0	0	0	0
LNC_003537	XLOC_072583	0.125166	0.105581	0.10651	0.24457	0.060475	0.193833	0.10567	0.066112	0.133691	0.376818	0.205826	0.471336
LNC_001442	XLOC_030011	0.09842	0.921739	0.051051	0.206173	1.78385	0.252275	1.35827	1.24064	0.551253	1.73531	0.63714	0.699422
LNC_002372	XLOC_050396	0	0	9.9e-05	0	0.145536	0.296736	0	0.004954	0.00014	0	0	0
LNC_004967	XLOC_101973	0	0.170554	0.341434	0.176111	0.30855	0	0.229897	0.09493	0.144459	0.283912	0.053844	0.252292
LNC_002792	XLOC_058605	0.265155	0.014154	0	0.087409	0.049043	0.10827	0	0	0.08412	0.404752	0.045221	0.092759
LNC_004766	XLOC_097977	1.01821	0.628819	0.68269	0.208865	0.279653	0.076568	0.366312	0.467064	0.220146	0.919529	0.381905	0.314734
LNC_006642	XLOC_138123	0.061916	0.169837	0.205862	0.532838	0.249178	0.214846	0.158965	0.080694	0.121717	0.406984	0.152248	0.100024
LNC_006698	XLOC_139343	0.287917	0.459128	0.430301	0.393267	0.247257	0.423291	0.530196	0.294051	0.361807	0.56811	0.353795	0.497178
LNC_001248	XLOC_024608	0.308569	0.43661	0.253043	0.242472	0.362872	0.277845	0.185772	0.168285	0.214597	0.426797	0.34967	0.266614
LNC_004903	XLOC_100697	0	0	0	0	0	0	0	0	0.297881	0	0	0
ENSMUST00000134427.1	ENSMUSG00000085586.1	3.54195	4.6006	5.24384	4.98344	4.66507	4.34462	3.7504	4.52875	4.33608	3.67804	3.94925	3.3987
LNC_004613	XLOC_095030	0	0.36355	0.283672	0.390536	0.195639	0.264267	0.589391	0.221249	0.526397	0.376664	0.265536	0.044066
LNC_000931	XLOC_019571	0.130791	0	0.256033	0.688321	0.082979	0.106247	0.166581	0.300482	0.234398	0	0.128876	0.086454
LNC_003981	XLOC_081982	0	0.046112	0	0.182185	0	0	0.286955	0.092379	0	0.038649	0	0.363717
LNC_000996	XLOC_020388	0.05684	0.2824	0.198083	0.042855	0.045079	0.095227	0.554195	0.133484	0.052053	0.07801	0.254248	0.251135
LNC_003190	XLOC_066135	0.415863	0.241361	0.431623	0.213871	0.146767	0.194095	0.107493	0	0.169063	0.491693	0.503311	0.553983
LNC_004821	XLOC_099499	0.20261	0.056214	0.140373	0.236231	0.195017	0.03457	0	0.272709	0.237213	0.358647	0.194573	0.185198
LNC_001981	XLOC_042242	1.24347	1.84369	1.45608	1.712	1.605	1.69335	1.49388	1.4325	1.60878	1.53196	1.52115	1.68072
LNC_006631	XLOC_137733	0.193872	0.050795	0.335863	0.23995	0.519454	0.2046	0.387767	0.277399	0.435729	0.662672	0.684942	0.183584
LNC_004461	XLOC_091903	0.045768	0	0.337449	0	0	0	0.084518	0.039824	0.281377	0	0	0.370086
ENSMUST00000174277.1	ENSMUSG00000092375.1	0.921156	0.931101	0.634218	0.868031	0.738108	0.561367	0.42794	0.604488	0.652647	0.617663	0.330931	0.65015
ENSMUST00000194077.1	ENSMUSG00000103181.1	0.081024	0.170864	0.516752	0.459421	0.250766	0.355001	0.172736	0.458006	0.184183	0.319981	0.239787	0.323854
LNC_000742	XLOC_015757	0	0.126588	0	0.100954	0.107664	0.132321	0	0.199078	0.253611	0.352266	0.056553	0.296181
LNC_006707	XLOC_139491	0.234752	0.095718	0.02663	0.157123	0	0	0.256224	0.073109	0.369533	0.0414	0.495798	0.07674
ENSMUST00000185312.1	ENSMUSG00000099512.1	1.20925	0	0.359014	0.249269	0.04804	0.393518	0.564669	0.325088	0.140692	0.532555	0.676143	0.576012
LNC_006284	XLOC_130535	0.161649	0.391382	0.21263	0.543829	0.442028	0.193868	0.055464	0.314891	0.395352	0.206217	0.331755	0.460158
LNC_005450	XLOC_112353	0.147231	0	0.045525	0	0	0	0	0.075353	0	0.144135	0.424841	0
LNC_004242	XLOC_087511	0.157413	0.161241	0	0.23294	0.206436	0.076689	0.041949	0	0.070684	0.347714	0.362211	0.123493
LNC_005631	XLOC_115915	0.515107	0.081267	0.383676	0.136211	0.18255	0.069492	0.428586	0.376563	0.271793	0.526781	0.395874	0.564342
LNC_002213	XLOC_047354	0.292991	0.103901	0	0	0	0	0.105039	0	0	0.259437	0.136783	0
LNC_003724	XLOC_076626	0.218294	0	0.055838	0	0	0.128132	0	0.053376	0	0	0.262646	0.068548
LNC_005726	XLOC_117896	0.426637	0.069081	0.142523	0.214347	0.040138	0	0.138187	0.127747	0.165945	0.216501	0	0.073367
ENSMUST00000231685	ENSMUSG00000116858	4.28517	3.42279	3.31408	2.80343	2.48326	3.18038	3.25747	3.01365	3.24208	3.86901	3.16333	2.73875
LNC_000830	XLOC_017469	0	0	0	0	0	0.019152	0.815357	0	0	0	0	0
LNC_000513	XLOC_010771	0	0	0.100293	0.30797	0.399583	0.091872	0.201014	0	0.338426	0	0.276828	0.399439
LNC_001576	XLOC_032332	3.19706	1.51715	3.5076	0	3.4797	2.61326	3.07401	2.91526	4.23764	0	4.95215	4.4693
LNC_001681	XLOC_034697	0.276201	0.06403	0.324591	0.072158	0.419194	0.197904	0.343265	0.255095	0.267481	0.822528	0.348741	0.391741
LNC_006175	XLOC_127638	0	0	0	0	0	0	1.04571	0	0	0	0	0.050419
LNC_003087	XLOC_064148	0.195044	0.125146	0.504568	0	0	0.215103	0.112178	0.133739	0.211404	0	0	0.149394
LNC_000369	XLOC_007237	0	0.182189	0.366156	0	0.080752	0	0.12279	0.057455	0.05138	0.242421	0.190575	0.11969
ENSMUST00000122990.1	ENSMUSG00000084946.2	0.046741	0.642014	0.73692	0.421374	0.228851	0.506078	0.535752	0.619265	0.524719	0.826543	0.807193	0.608528
LNC_005541	XLOC_113786	0.344589	0.135941	0.07338	0.393326	0.270567	0.199752	0.104966	0.393735	0.354072	0.199672	0.335967	0.340362
LNC_004253	XLOC_087676	0.466656	0.477634	0.640439	0.708321	0.417574	0.295955	0.432605	0.509071	0.529758	0.784633	0.642393	0.611907
LNC_006603	XLOC_137248	0	0	0	0	0	0.308063	0	0	0.036902	0.061291	0	0
LNC_000714	XLOC_015395	0.117243	0.324361	0.506146	0.433766	0.095848	0.205511	0.19772	0.132108	0.202053	0.395111	0.285015	0.333344
LNC_002550	XLOC_053705	0	0.004167	0.105094	0	0	0.046631	0	0	0.221827	0	0.296001	0.170525
LNC_001549	XLOC_031627	2.12829	3.3915	2.94038	1.57292	2.86152	1.60726	1.11537	1.54832	5.63777	3.33725	5.58241	6.51482
LNC_004824	XLOC_099550	0.029625	0.259852	0.305591	0.214885	0.288651	0.337448	0.19292	0.337175	0.237255	0.477477	0.342389	0.26269
LNC_003175	XLOC_065640	0.281325	0.444955	0.199374	0.665339	0.46364	0.180393	0.298377	0.598083	0.329326	0.36055	0.203012	0.526327
LNC_004704	XLOC_096610	0.166229	0	0.08524	0.176916	0.212164	0.161423	0.359762	0.098488	0	0.058131	0.362221	0
LNC_002037	XLOC_043245	0.174383	0.086691	0.098487	0.348576	0.224252	0.343646	0	0	0.208341	0.291772	0.499738	0.117233
LNC_002127	XLOC_046221	0.103568	0	0	0.245132	0	0	0.08	0.264269	0.134574	0.079036	0.074947	0.117755
LNC_005340	XLOC_109683	0.147665	0.163894	0.082668	0	0.14825	0	0.165689	0	0.139593	0.154964	0.775607	0.362321
ENSMUST00000202073.1	ENSMUSG00000107277.1	0.578154	0.543172	0.514625	0.468202	0.443379	0.419127	0.461152	0.347144	0.301752	0.427344	0.377545	0.446048
ENSMUST00000205707.1	ENSMUSG00000108812.1	0.331122	0.519413	0.330829	0.734413	0.171659	0.52602	0.475739	0.272976	0.480179	0.563711	0.352523	0.214257
ENSMUST00000166593.1	ENSMUSG00000090860.1	0.081667	0.03601	0.177619	0.225155	0.100358	0	0	0.053702	0.05812	0.078441	0.129953	0.324044
LNC_001611	XLOC_033296	0.382279	0.486816	0.324185	0.389896	0.383237	0.320752	0.383874	0.116261	0.413974	0.556618	0.441092	0.669136
ENSMUST00000220642.1	ENSMUSG00000114113.1	0.085063	0.068233	0.200976	0.114582	0.204833	0	0.08218	0.151912	0.28735	0.150182	0.21621	0
LNC_004678	XLOC_096039	0	0	0	0	0	0.054723	0	0	0.615409	0	0	0
LNC_000977	XLOC_020237	0.073255	0.334765	0.104125	0	0.21007	0.142278	0.104347	0.043087	0.087912	0.150014	0.118938	0.050856
ENSMUST00000176744.1	ENSMUSG00000093405.1	0.613291	0.22987	0.060591	0.278515	0.096946	0.285452	0	0.07616	0.204859	0.104306	0.172477	0.295192
ENSMUST00000152575.1	ENSMUSG00000106951.1	0.623318	0.344256	0.410802	1.24732	0.418024	0.600614	0.264856	0.253883	0	0.256667	0.0972	0
ENSMUST00000209115.1	ENSMUSG00000109006.2	13.4681	14.1963	10.8655	10.6193	13.7982	11.6053	10.9839	11.8976	10.514	10.7238	9.03389	10.193
LNC_001086	XLOC_022427	1.21031	0.745346	0.944455	0.830105	0.012601	0.742078	0	0.737488	0.982933	1.49962	1.53916	0.013596
ENSMUST00000181499.1	ENSMUSG00000097045.1	0.786342	0.082119	0.082842	0.124223	0.241288	0.188987	0.422702	0.239733	0.069826	0.082292	0.191233	0.244239
LNC_006217	XLOC_128755	0	0	0	0	0	0	0	0	0	0	0.537872	0
ENSMUST00000180432.8	ENSMUSG00000097039.8	2.0175	0.46742	3.16646	1.22167	1.95207	1.26044	3.5616	2.90358	2.2017	0.869812	4.03274	3.38571
LNC_006020	XLOC_124791	0	0	0	0.090712	0.236513	0	0	0	0	0.097495	0.43306	0
ENSMUST00000200213.1	ENSMUSG00000108394.1	0.386719	0.322361	0.430323	0.64064	0.310646	0.458755	0.35816	0.313908	0.347968	0.562414	0.309741	0.46775
ENSMUST00000218033.1	ENSMUSG00000112254.1	0.271916	0.307807	0.168202	0.696034	0.254614	0.295092	0.364543	0.409143	0.284931	0.389017	0.257148	0.360187
ENSMUST00000190563.1	ENSMUSG00000056687.9	0	0	0	0	0	0	0	0	0.286413	0	0	0
LNC_006558	XLOC_135989	0.36394	0.085339	0.344361	0.368333	0.308517	0.113834	0.215541	0.025398	0.305522	0.404726	0.363309	0.287844
ENSMUST00000164605.7	ENSMUSG00000090565.7	0.411257	0.526348	0.257107	0.61425	0.469535	0.381241	0.512742	0.493816	0.262173	0.348695	0.38696	0.303288
ENSMUST00000183327.1	ENSMUSG00000090386.9	0.002662	0	0.003559	0.012045	0.002597	0.746781	0.004355	0.014989	0	0.005906	0	0.002469
ENSMUST00000232216	ENSMUSG00000116793	2.66778	0.73586	1.10105	0.793574	1.10902	1.12642	0.805317	0.880729	0.545133	1.00928	0.44442	0.790815
LNC_004444	XLOC_091743	0.436688	0.081186	0.116416	0.338586	0.484932	0	0.179726	0.430932	0.172496	0.395176	0.247148	0.117576
LNC_004300	XLOC_089096	0.265204	0.38487	0.334825	0.378664	0.314121	0.263354	0.273183	0.32395	0.384739	0.428301	0.450597	0.446558
LNC_005822	XLOC_120319	0.265728	0.310317	0.120188	0.116584	0	0	0	0.074443	0.175221	0.133523	0.098405	0.349765
ENSMUST00000218917.1	ENSMUSG00000111929.1	1.36326	1.19948	0.715399	1.44437	1.34217	0.915888	1.24995	0.430687	0.855875	0.739427	0.89491	0.991548
ENSMUST00000221181.1	ENSMUSG00000113244.1	0	0.13957	0.525347	0.322357	0.188141	0.484646	0.283718	0.271946	0.167994	0.286775	0.307505	0.342492
LNC_003229	XLOC_066572	0.66585	0.913813	1.15283	0.907239	0.217389	1.03179	0.756496	0.863675	1.18233	1.44765	0.986681	1.15827
LNC_003866	XLOC_079078	0.471284	0.383801	0.423298	0.443387	0.330467	0.31027	0.39311	0.354967	0.649965	0.575893	0.570442	0.614509
LNC_003182	XLOC_065817	0.083542	0	0	0	0	0	0	0	0.31926	0	0	0
LNC_004273	XLOC_088190	0	0.164141	0.478034	0.425252	0.039865	0.206157	0.416056	0.252762	0.109804	0.223743	0.281646	0
LNC_004959	XLOC_101847	0.616021	0.2871	0.250292	0.199848	0.176216	0.486292	0.182838	0.103716	0.32574	0.458585	0.80684	0.460462
LNC_003232	XLOC_066586	0.909155	0.788354	0.57705	0.863753	0.593151	0.951563	0.426298	0.576455	0.945345	1.66524	1.26788	1.40712
LNC_000119	XLOC_002094	0	0	0	0	0	0.153379	0.166907	0.134647	0.353419	0	0	0
LNC_002847	XLOC_059630	0.368723	0.093115	0.263863	0.216374	0.197172	0.188344	0.575283	0.351597	0.048988	0.158286	0.108794	0.072569
LNC_004364	XLOC_090524	0.388721	0	0.144738	0	0	0	0.273102	0.035529	0	0.287502	0.289967	0.089331
LNC_003963	XLOC_081844	0.315797	0	0	0	0.309449	0	0	0	0	0	0	0
LNC_004068	XLOC_083743	1.94607	0.972169	0.561077	0.559424	0.530473	0.49777	0.541014	0.39854	1.03604	1.29575	1.16011	0.997185
ENSMUST00000209785.1	ENSMUSG00000096974.2	1.59385	2.33549	2.10943	2.06433	2.03209	2.63931	2.86418	1.80368	1.27155	2.80181	0.994553	1.31183
LNC_004268	XLOC_087999	0.274875	0	0	0	0.261583	0.089376	0.141451	0	0	0.162561	0	0.095948
ENSMUST00000180784.1	ENSMUSG00000097728.1	0.996219	0.639261	0.415796	0.816264	0.577135	0.428863	0.466068	0.563842	0.508763	0.490526	0.541362	0.600228
LNC_002351	XLOC_049896	1.41892	1.43886	1.20078	0.167968	0.353141	0.842602	2.21987	0.946694	1.32195	2.68229	1.41657	1.54747
LNC_004848	XLOC_099946	0.266212	0.550905	0.456411	0.529598	0.390177	0.317733	0.285177	0.222663	0.531146	0.582027	0.559809	0.691659
LNC_003563	XLOC_073342	0.391084	0.319289	0.201986	0.991369	0.177592	0.345238	0.063749	0.008664	0.519447	0.974965	0.218782	0.435389
LNC_003793	XLOC_077829	0	0	0	0	0	0	6.89005	0	0	0	0	0
ENSMUST00000192549.1	ENSMUSG00000103466.1	0.739256	2.11539	1.25764	1.76266	1.93532	1.44277	0.873907	1.25632	1.85277	1.32107	1.64844	1.75416
ENSMUST00000190224.1	ENSMUSG00000100455.1	1.89273	2.14509	1.61813	2.46219	1.75935	1.63708	1.84291	1.436	1.63462	1.80657	1.64526	1.41907
ENSMUST00000128121.1	ENSMUSG00000087211.7	1.95697	0.012025	0	0.04089	0	0	0	0.073948	0	0.189846	0	0.288469
LNC_006508	XLOC_134915	0.016615	0.099166	0.020008	0	0	0	0	0.331173	0.070104	0	0.060736	0.043848
LNC_001907	XLOC_040163	0	0.156952	0	0.244554	0.471839	0.547901	0	0	0.137598	0.355916	0.27126	0.537083
LNC_004905	XLOC_100709	0.48707	0.435229	0.079829	0.326298	0.143159	0.402194	0.319731	0.230795	0.526764	0.388069	0.180123	0.136726
ENSMUST00000172588.1	ENSMUSG00000092386.1	1.18586	0.863622	0.673454	0.768928	0.469571	0.251549	0.57244	0.84964	0.863344	1.06628	0.845201	0.794675
LNC_001635	XLOC_033580	0.819809	1.05825	0.861964	1.71566	0.977188	1.14585	1.09179	1.14332	1.00583	1.24304	1.38566	1.40907
LNC_000151	XLOC_003048	0.858044	0.863145	0.673426	0.656784	0.697463	0.50455	0.340346	0.535154	0.420327	1.13042	0.68343	0.883095
LNC_002854	XLOC_059742	0	0	0	0	0	0	0	0	0.250649	0	0.183094	0
LNC_002447	XLOC_051891	0.078958	0.196344	0.099036	0.050009	0.160435	0.181441	0.095268	0.245616	0.248618	0.639304	0.365719	0.12044
ENSMUST00000198712.4	ENSMUSG00000105891.4	5.76921	1.08526	1.57465	2.07305	1.69617	2.53444	1.84769	1.93724	1.75288	1.7247	1.27392	1.77315
LNC_002816	XLOC_059109	0	0	0	0	0	0.379693	0	0	0	0	0	0
LNC_002995	XLOC_062583	0	0.167754	0.190895	0.15293	0.530593	0.052137	0.163372	0.139042	0.499607	0.166992	0	0.368065
LNC_004083	XLOC_084045	4.31262	3.03668	4.0321	2.267	2.46644	2.08114	1.96739	1.93898	2.95246	3.93368	2.94548	3.68417
LNC_003405	XLOC_070048	0.096492	0.095509	0	0.145476	0	0	0.246952	0	0	0	0	0.418589
LNC_001698	XLOC_035010	0.334825	0.325878	0.164419	0.181851	0.218931	0.315368	0.352333	0.204037	0.354681	0.311374	0.358038	0.430384
LNC_000010	XLOC_000254	1.14808	1.25572	2.15649	2.08714	0.815857	1.65514	1.13286	0.792739	1.83278	2.06205	1.10402	1.81138
LNC_003496	XLOC_071747	0	0.256628	0	0.242721	0.183721	0.221025	0.352196	0.147149	0.100188	0.17623	0.500963	0.213075
LNC_001440	XLOC_029912	0.178876	0.483418	0.417718	0.605079	0.393972	0.272094	0.414194	0.275918	0.632236	0.633706	0.629743	0.402384
LNC_002839	XLOC_059488	0	0	0	0	0	0	0	0.281082	0	0	0.034046	0
ENSMUST00000200120.1	ENSMUSG00000105842.1	0.201379	0.323957	0.105798	0.519601	0.103672	0.221455	0.242679	0.205475	0.317765	0.245407	0.16269	0.239462
LNC_003133	XLOC_064962	0.34723	0.171443	0.186363	0.161969	0.211953	0.105615	0.111173	0	0.144572	0.426209	0.279345	0.401018
ENSMUST00000192351.1	ENSMUSG00000102820.1	0.755045	1.06576	0.80333	1.01691	0.54471	0.788075	0.978409	1.07708	0.660704	1.20857	0.882619	0.669172
LNC_004456	XLOC_091843	0.162936	0.087211	0.539389	0.265261	0.282272	0.62781	0.114973	0.213922	0.339806	0.369309	0.172615	0.508128
LNC_000004	XLOC_000155	0.363119	0.414142	0.491472	0.594757	0.330577	0.373539	0.507973	0.408411	0.36777	0.529967	0.410092	0.250715
LNC_005899	XLOC_122374	0.308122	0.379245	0.218072	0.3916	0.416557	0.447086	0.574005	1.08393	0.368544	0.509375	0.538608	0.280559
ENSMUST00000146976.1	ENSMUSG00000085023.1	0.404932	0.492665	0.470138	0.4421	0.53778	0.444882	0.461352	0.414261	0.172757	0.577613	0.358846	0.855542
LNC_005704	XLOC_117380	0	0.342635	0	0	0	0	0	0	0	0	0	0
ENSMUST00000194336.1	ENSMUSG00000103731.1	0.992749	0.614669	0.884631	1.27139	1.13902	0.703498	1.45954	1.19312	1.37503	1.32344	0.728876	1.19815
ENSMUST00000159663.7	ENSMUSG00000053332.13	1.61278	1.9677	3.12106	1.47113	0.936213	2.20177	1.44594	1.61446	1.56454	2.45714	3.47196	2.55986
LNC_006141	XLOC_126983	0.218499	0.341596	0.228393	0.460749	0.177751	0.121936	0.192118	0.207563	0.35289	0.194925	0.469378	0.394885
ENSMUST00000150367.3	ENSMUSG00000087466.3	1.59301	0.922137	1.01592	0.680983	0.892042	0.854193	0.81514	0.845687	0.779256	1.07133	0.783783	1.10757
LNC_005778	XLOC_119274	0.510249	0.269471	1.18847	0.179617	0.36509	0.702332	0.12512	0.325968	0.435056	0.504649	0.452758	0
LNC_003614	XLOC_074330	0.098351	0	0.151632	0.43679	0.02976	0.135855	0	0.282534	0.072058	0.253497	0.080127	0.083929
LNC_004078	XLOC_083887	0	0.120929	0	0.058945	0	0	0	0	0	0.2602	0.092945	0.519859
LNC_001081	XLOC_021964	0	0.151893	0	0	0.373043	0	0	0	0	0	0	0
LNC_006063	XLOC_125624	0	0.240839	0.202412	0	0	0.144486	0	0	0.205207	0.192057	0.467631	0.095882
ENSMUST00000180569.1	ENSMUSG00000097166.1	0.316078	0.645502	0.290146	0.324569	0.570884	0.341456	2.00398	0.748287	0.5598	0.540498	0	0.788393
LNC_001456	XLOC_030166	0.072416	0.089591	0.308112	0	0	0.211446	0	0.286871	0.129268	0	0.072317	0.371168
LNC_001892	XLOC_039861	0	0	0.143383	0.074625	0	0	0.136383	0	0.061555	0.403261	0.2852	0
ENSMUST00000145894.1	ENSMUSG00000087644.1	3.62724	5.25143	5.29791	4.71273	4.53216	3.9748	3.8831	4.15926	6.51944	7.97431	6.78525	6.79515
LNC_002797	XLOC_058677	0.103065	0.304228	0.062177	0.701189	0.390019	0.102161	0.155229	0.304689	0.195926	0.35883	0.161811	0.291241
LNC_006023	XLOC_124843	0	0.218301	0	0	0.335317	0	0	0	0	0	0	0
LNC_000429	XLOC_008553	0.474414	0.371881	0.249686	0.371525	0.288611	0.058969	0.09395	0.19397	0.196826	0.374987	0.244934	0.483702
LNC_004879	XLOC_100299	0.082438	0.158165	0.047724	0.048849	0.085584	0.086413	0	0.240435	0.09851	0.123155	0.194919	0.57256
LNC_003568	XLOC_073360	0	0	0	0	0.129391	0	0	0.302809	0	0.283924	0	0.106781
LNC_005989	XLOC_124237	0	0.348183	0.050609	0.362223	0.307531	0.222857	0	0	0.334863	0.34747	0.69938	0.39111
LNC_005970	XLOC_123989	0	0	0	0	0.000743	0.000782	0.000919	0	0.432992	0.014276	0	0
LNC_001643	XLOC_033704	2.08502	1.32959	2.0013	1.41843	1.39958	1.40912	1.21226	1.38579	2.14863	2.57439	2.61738	2.15835
LNC_004295	XLOC_088830	0	0.294539	0	0	0.263679	0.130198	0	0	0.088736	0	0	0.584391
LNC_001689	XLOC_034773	0.445845	0.464351	0.543835	0.366164	0	0.285628	0.099721	0.110522	0.421984	0	0	0.411661
LNC_006052	XLOC_125562	10.5435	10.3899	12.3704	11.7642	10.3891	8.91952	7.98397	8.42729	13.435	14.1967	13.0808	12.4955
LNC_000953	XLOC_019903	0.44217	0.079531	0.094761	0.136116	0.078229	0.126536	0.046493	0	0	0	0.133449	0.276921
ENSMUST00000196513.1	ENSMUSG00000106149.1	0.133587	0.13144	0.123572	0.491651	0.114318	0.18447	0.140941	0.12918	0.192882	0.143528	0.123663	0.142593
LNC_000403	XLOC_008122	0.098214	1.47535	0.453266	0.405588	1.05926	0.788307	0.503148	0.98915	0.378694	0.849333	0.231601	0.62854
LNC_002149	XLOC_046508	0	0.199473	0	0	0.095504	0	0.19533	0.05225	0	0.47489	0.054447	0
LNC_001583	XLOC_032503	0.111957	0.089431	0.532886	0.046172	0	0.33057	0	0	0.164528	0.267966	0.197917	0.04436
ENSMUST00000192431.1	ENSMUSG00000102420.1	0.104643	0.222555	0.314106	0.397544	0.364108	0.206151	0.519791	0.528851	0.496383	0.714377	0.341576	0.313381
LNC_000382	XLOC_007375	0.455177	0.644145	0.892412	0.461063	0.56476	0.472838	0.427001	0.326372	0.657134	0.931451	0.946533	1.03355
LNC_002506	XLOC_053034	1.85959	1.53407	1.83683	1.79355	1.26287	0.98107	1.16901	1.60446	1.96054	2.19364	1.67754	1.88539
LNC_003553	XLOC_072948	0.498411	0.679087	0.328201	0.135942	0.058857	0.087587	0	0.106295	0.498778	0.417984	0.061626	0.387299
LNC_002694	XLOC_056855	1.71938	1.67244	0	0	1.22442	1.75189	0.80052	0.884794	2.0034	2.04973	0.740103	1.5778
LNC_004602	XLOC_094918	0.188361	0	0.343537	0.407753	0.199172	0	0	0.286161	0	0	0.229947	0
LNC_005358	XLOC_110130	0.335099	0.140396	0	0.07038	0.126996	0	0.283869	0.117216	0.358739	0.140226	0.206991	0
LNC_002329	XLOC_049582	0	0	0	0.188362	0.379048	0	0.142959	0	0	0.205737	0.334826	0.137947
ENSMUST00000181800.1	ENSMUSG00000085457.3	3.93152	2.29083	1.67199	1.7533	2.72632	2.60044	1.83847	2.00274	1.78049	2.46067	2.21447	2.48674
LNC_003497	XLOC_071887	0.039658	0	0.054853	0	0	0	0	0	0	0.33884	0	0
ENSMUST00000136697.1	ENSMUSG00000086213.2	0.5241	0.339644	0.129854	0.272936	0.479686	0.272687	0.186541	0.320527	0.314422	0.431674	0.500464	0.329681
LNC_005823	XLOC_120340	1.46352	1.35019	1.51453	1.05259	0.999207	0.897124	0.756278	0.731725	1.54125	1.94611	1.73223	2.22228
LNC_004741	XLOC_097421	0.030958	0	0	0	0	0	0	0	0	0.556743	0.39659	0
ENSMUST00000153817.7	ENSMUSG00000087575.7	0.590002	0	0.223245	0.097844	0.192697	0.195961	0.150101	0	0	0	0.179791	0
LNC_006483	XLOC_134494	0	0.309038	0	0	0.069885	0.071395	0	0.096755	0.131608	0.536559	0.146102	0.260337
LNC_003084	XLOC_064120	0.031733	0.038248	0.130779	0.078974	0.084858	0.057296	0.285541	0.047798	0.187258	0.730189	0.158913	0.115009
LNC_004212	XLOC_086844	0	0	0	0	0	0	0	0.421073	0	0	0	0
LNC_005255	XLOC_108106	0.269216	0.25908	0.454777	0.367776	0.210526	0.214129	0.203222	0.270032	0.485517	0.389237	0.306102	0.713916
LNC_001916	XLOC_040255	0	0	0	0	0	0	0	0	0	0.389284	0	0
LNC_001606	XLOC_033190	0.264041	0	0.372522	0.180486	0.174885	0.223717	0.170995	0.192285	0.175233	0.353671	0.658973	0.572878
LNC_003469	XLOC_071284	0	0	0	0	0	0.09666	0.42845	0	0	0	0	0
LNC_000398	XLOC_008050	0.054631	0.624603	0.212515	0.159929	0.538165	0.302381	0.203822	0.441465	0.257498	0.214697	0.068196	0.289955
LNC_003449	XLOC_070815	0.63294	0.835892	0.846669	0.932774	0.60558	0.706178	0.758077	0.754955	0.697035	0.803204	0.589794	0.759648
LNC_000646	XLOC_013873	0.686421	0.540933	0.272872	0.308092	0.231422	0.363171	0.297153	0.351003	0.402657	0.254301	0.37125	0.381561
LNC_002887	XLOC_060170	0.598645	0.429655	0.56304	0.407599	0.385862	0.197965	0.366153	0.35585	0.516089	0.878576	0.77703	0.716264
ENSMUST00000197338.1	ENSMUSG00000105813.1	0.370344	0.409068	0.484859	0.580799	0.423753	0.370541	0.379394	0.34479	0.455895	0.495418	0.427504	0.494534
LNC_003019	XLOC_062942	0	0.356861	0	0.272312	0.365912	0.285981	0.236465	0	0.08895	0.25865	0	0
LNC_005077	XLOC_103997	0.183241	0.207754	0.206377	0.090458	0.087427	0.140445	0.070088	0.106467	0.354294	0.138489	0.328308	0.275108
LNC_004220	XLOC_086964	0.172375	0.112236	0.026055	0.062516	0	0.01246	0.120972	0.209662	0.084256	0.406361	0.149269	0
LNC_000290	XLOC_005674	0	0.46481	0.316421	0.216868	0.310808	0.30681	0.167519	0.228677	0.165765	0.065974	0.191325	0.196713
LNC_005489	XLOC_112996	0.390863	0.035003	0	0.241289	0.079687	0	0	0.091491	0.10375	0.198512	0.021113	0
LNC_002360	XLOC_050227	4.9664	3.01536	3.63028	4.5593	3.59748	2.63248	2.80408	1.28792	4.7395	4.22885	4.32512	4.80967
LNC_006166	XLOC_127518	0.167903	0.15153	0	0.273817	0.362771	0.280057	0.153191	0.15814	0.32954	0.226767	0.099983	0.177133
ENSMUST00000200347.1	ENSMUSG00000104693.1	0.420801	1.31745	0.568451	0.761987	0.576941	0.591234	0.304667	0.50594	0.560255	0.273753	0.26792	0.488606
LNC_003877	XLOC_079343	1.09763	0.619588	0	0	0.634586	0	0	0.917906	0.653819	0.008027	0	0.006912
LNC_002862	XLOC_059813	0	0.377852	0.127059	0.244501	0.227858	0	0	0	0.107276	0	0.148713	0.118285
LNC_005895	XLOC_122279	0.952506	0.63985	0.555841	0	0.444094	0.617219	0.697294	0.95665	0.541234	0.827541	0.306174	0.74528
LNC_000873	XLOC_018794	0.392341	0.049884	0.171204	0	0	0.056952	0.06	0.027425	0.097857	0.122234	0.2467	0.121815
ENSMUST00000170933.1	ENSMUSG00000091985.1	1.97123	1.70568	1.27219	1.62094	1.5897	1.64896	1.75914	1.8445	1.74897	1.65418	1.60318	2.00636
LNC_006183	XLOC_127715	0.044868	0.008065	0.02253	0	0	0.116183	0.001565	0.665414	0.487265	0	0.039546	0.004048
ENSMUST00000180937.1	ENSMUSG00000097716.1	0.543828	0.607462	0.41215	0.440975	0.602431	0.694772	0.747774	0.594321	0.320293	0.276871	0.826857	0.408493
LNC_001142	XLOC_023256	0	0.117984	0.065304	0.062746	0	0	0.119276	0	0	0.471362	0	0
ENSMUST00000217425.1	ENSMUSG00000111345.1	0.244517	0.334277	0.20286	0.481432	0.14937	0.37504	0.223234	0.106971	0.272373	0.137558	0.175574	0.22737
LNC_005499	XLOC_113268	10.0863	12.8147	12.6782	3.78346	9.67592	7.99676	6.07655	11.9139	12.901	16.2355	13.2557	13.628
LNC_003737	XLOC_076849	0.189147	0.398376	0.251082	0.154968	0.069687	0.251046	0.126267	0.192127	0.160067	0.092187	0.287702	0.208108
ENSMUST00000204094.1	ENSMUSG00000107494.1	0.16734	0	0	0.091096	0	0	0	0.073656	0	0	0	0
LNC_001013	XLOC_020668	0	0	0.076282	0.137195	0.449219	0.176914	0.135898	0.095904	0	0.11473	0.356119	0.312619
LNC_002423	XLOC_051520	0.123917	0	0.203528	0.145191	0.050663	0.190436	0.148897	0.117415	0.183411	0.426484	0.321076	0.338748
LNC_004687	XLOC_096193	0	0	0	0	0	0	0.175702	0	0.338136	0	0	0
LNC_004324	XLOC_089631	0.141077	0.308364	0	0.045277	0.123132	0	0	0.171476	0.477317	0.301936	0	0
LNC_004284	XLOC_088619	0.238455	0.396904	0.220655	0.267751	0.381563	0.411142	0.331466	0.465978	0.553832	0.329996	0.377214	0.342405
LNC_002787	XLOC_058559	0.377395	0.357085	0.375484	0.640058	0.324504	0.254696	0.311977	0.269072	0.345137	0.555769	0.367818	0.398184
LNC_003510	XLOC_072099	0	0	0.354094	0	0	0	0	0	0	0	0	0
LNC_006040	XLOC_125381	2.80008	0	0.224669	0.581225	0.448725	1.10448	1.03789	1.05912	1.42749	1.00272	1.18451	1.90916
LNC_002740	XLOC_057802	0.105239	0	0	0	0	0	0	0	0.180833	0	0.420383	0.068618
LNC_002122	XLOC_045998	0	0	0	0	0	0	0	0.187094	0	0	0.314396	0
ENSMUST00000196232.1	ENSMUSG00000105939.1	0.76926	1.1671	1.36179	1.82119	0.731379	1.10201	1.19969	1.18282	1.06235	1.43192	1.19835	1.27851
LNC_005711	XLOC_117634	0	0.33521	0	0.113937	0.061324	0.189108	0.310959	0.314455	0.15719	0.233234	0.134534	0.235065
ENSMUST00000193672.1	ENSMUSG00000103695.1	0	0.362107	0.325213	0.133806	0.495176	0.328121	0.303244	0.23893	0.027942	0.350163	0.185041	0.160762
ENSMUST00000218666.1	ENSMUSG00000112336.1	0.577711	2.29102	1.60743	1.98266	1.84314	1.38875	1.32669	1.47239	2.38394	1.52003	1.7163	1.44034
ENSMUST00000198212.1	ENSMUSG00000105845.1	0.065424	0.087423	0.083458	0	0.220465	0.078113	0.061815	0	0	0	0	0.139983
LNC_002190	XLOC_047038	2.17063	2.72867	2.24722	0.841645	0.02251	1.58825	0.054357	1.40515	2.42668	0	0.026681	2.31974
LNC_006533	XLOC_135401	0.234375	0.079304	0.412232	0.151299	0.108601	0.249725	0.252982	0.080263	0.525218	0.384039	0.297601	0.201148
LNC_003580	XLOC_073529	0.202404	0.372268	0.062299	0	0.298583	0.221421	0.170007	0.091863	0.093716	0.126449	0.319009	0.25466
ENSMUST00000182689.7	ENSMUSG00000097451.10	1.34734	2.20095	1.71596	2.01066	1.48828	1.42581	1.6383	2.09197	1.82888	2.34344	1.90694	1.92942
LNC_002642	XLOC_055980	0.300089	0.149787	0.494852	0.358436	0.240636	0.378025	0.195137	0.337289	0.377335	0.286546	0.26575	0.27093
LNC_002436	XLOC_051681	0	0	0	0	0	0	0	0	0.32391	0	0	0
LNC_002308	XLOC_049362	0	0	0.423379	0	0	0	0	0	0	0	0	0
LNC_006356	XLOC_131922	0.241088	0.22994	0.348917	0	0.120921	0.073676	0.379254	0.26272	0	0.346221	0	0.255239
LNC_001828	XLOC_038198	0	0	0	0	0.069698	0	0	0	0	0.379706	0	0
LNC_006132	XLOC_126868	0.146651	0	0	0.080784	0	0.146548	0.062614	0.323944	0.202383	0.316258	0.447839	0.392261
ENSMUST00000153521.1	ENSMUSG00000086021.1	0.480315	0	0	0.246948	0	0	0	0	0	0.096828	0	0
LNC_005537	XLOC_113638	0	0	0	0	0.734833	0	0	0	0.275177	0	0	0
LNC_006486	XLOC_134527	0	0	0	0.059235	0	0	0	0	0	0.147279	0.369142	0
ENSMUST00000198824.1	ENSMUSG00000106164.1	1.1395	1.19729	1.1962	1.15137	1.04822	2.03562	1.61828	1.75584	0.9297	1.90999	1.03748	1.45804
LNC_002075	XLOC_044274	0.053159	0.48755	0.509721	0.369645	0.506325	0.425598	0	0.474854	0.187013	0.247561	0.915796	0.966192
LNC_001738	XLOC_036340	0.369278	0.024294	0	0	0.140882	0	0	0	0	0.11641	0	0
ENSMUST00000062902.6	ENSMUSG00000046109.6	1.07119	1.20353	1.17395	1.42348	1.25726	1.03302	0.919291	1.08068	0.823159	1.00493	0.790106	0.75552
LNC_003994	XLOC_082213	0.516252	0.5661	0.616569	0.497257	0.393512	0.225536	0.263336	0.226123	0.524723	0.709473	0.439524	0.622727
LNC_003117	XLOC_064770	0.092873	0.089024	0.215178	0.127949	0.523425	0.03067	0	0	0.107578	0.084842	0.103057	0.037906
ENSMUST00000191034.1	ENSMUSG00000100037.1	0.162022	0.012168	0.131498	0	0.247075	0	0.055487	0	0.018165	0	0.022505	0
LNC_002737	XLOC_057711	0.318838	0	0.182291	0.125358	0	0	0.604064	0.11313	0	0	0.171315	0
LNC_000819	XLOC_017289	0.049467	0.052158	0.407256	0.315077	0.176766	0	0.151358	0.160396	0.297792	0.248218	0.395029	0.051743
LNC_001772	XLOC_036916	0	0.505356	0.192382	0	0.314305	0.282272	0.113824	0.162236	0	0.107282	0	0.075164
LNC_005421	XLOC_111442	0.069	0.227033	0.039595	0.230962	0.085721	0.361974	0.039547	0.173653	0.028838	0.201205	0	0.142229
LNC_005591	XLOC_115165	0.403952	0.245382	0.24168	0.181538	0	0.044745	0.031927	0.154203	0.179692	0.206467	0	0.170691
LNC_004945	XLOC_101585	0.964073	0.7987	0.870268	0.80711	0.646099	0.597044	0.623531	0.558112	0.564431	1.0252	0.671567	0.944208
ENSMUST00000222653.1	ENSMUSG00000114181.1	0.623324	0.293314	0.271988	0.412447	0.438382	0.261744	0.132303	0.295638	0.517615	0.425217	0.349004	0.244948
ENSMUST00000144853.7	ENSMUSG00000071753.11	7.41973	5.99537	3.96838	4.35281	4.65889	5.81996	4.85088	5.20411	5.46776	5.89012	4.79992	4.85284
LNC_004234	XLOC_087217	0	0	0	0	0	0	0	0	0.331967	0.125868	0	0
LNC_004358	XLOC_090273	0	0	0	0	0	0	0.047639	0	0.442495	0	0	0
ENSMUST00000141926.1	ENSMUSG00000086754.1	0.623804	0.277138	0.369185	0.09654	0.155328	0.300254	0.188298	0.143174	0.349275	0.200394	0.098271	0.243617
LNC_003043	XLOC_063371	0	0	0	0	0	0	0	0	0.583836	0	0	0
LNC_002790	XLOC_058561	5.38296	3.12918	5.08896	3.54737	3.93905	2.73673	2.63644	3.61668	4.47673	4.23708	5.91323	4.48176
LNC_003777	XLOC_077538	0.168431	0.197858	0.231061	0.234737	0.221216	0.119657	0.214156	0.155903	0.290528	0.227271	0.244261	0.449646
ENSMUST00000128815.8	ENSMUSG00000086224.8	0.877381	0	0.170975	0.178441	0.12158	0.053231	0.135881	0.031955	0.254691	0.075857	0.072743	0.095243
LNC_003252	XLOC_066868	0	0.389757	0	0	0	0	0	0	0	0	0	0
ENSMUST00000128026.1	ENSMUSG00000073236.4	2.48745	2.76798	3.05085	2.815	2.41362	2.85708	3.149	2.60827	2.63713	2.88895	2.99658	3.04353
LNC_002021	XLOC_042907	0.920469	0.356639	0.497586	0.541636	0.301002	0.580788	0.522511	0.450145	0.588686	0.758614	0.67221	0.915962
LNC_006527	XLOC_135298	0.173776	0.479596	0.638922	0.355603	0.328747	0.294335	0.277015	0.464275	0.667362	0.938569	0.489539	0.389721
LNC_004191	XLOC_086439	0	0	0	0.350492	0.245424	0.062525	0	0	0.115449	0.100058	0.169313	0
LNC_006723	XLOC_139736	0.313938	0	0	0	0	0	0	0	0	0	0	0
LNC_000958	XLOC_019971	0	0.541529	0.063128	0	0	0	0.166672	0	0	0	0.170962	0
LNC_001586	XLOC_032642	0.438772	0.20562	0.206047	0.607055	0	0	0	0.171671	0.542053	0.207188	0.467386	0.662609
LNC_001059	XLOC_021469	0	0.108801	0.08497	0.043632	0.038222	0	0.162899	0.069029	0.03599	0.105228	0.159014	0.376853
LNC_005945	XLOC_123487	0.369002	0.225674	0	0.248172	0.058044	0.228927	0.334235	0.190971	0	0.071898	0.367952	0.382745
ENSMUST00000205957.1	ENSMUSG00000108693.1	0.213399	0.455651	0.505254	0.539574	0.373889	0.383427	0.266012	0.492471	0.44975	0.539477	0.269508	0.460952
ENSMUST00000180712.7	ENSMUSG00000097177.8	0.873502	0.520151	0.48447	0.535815	0.681869	0.779798	0.804417	0.680054	0.520656	0.451722	0.43911	0.575129
LNC_001096	XLOC_022698	1.23972	0.711155	0.714611	0.069854	1.08865	0.57263	0.550003	0.918475	0.775154	0.741247	0.546803	1.46835
LNC_003162	XLOC_065503	0.423959	0.847486	0.615748	0.172904	0.504942	0.516196	0.508037	0.832434	0.236729	0.334676	0.449313	0.830766
LNC_000457	XLOC_009039	1.25869	0.532662	0.483747	0.430564	0.71209	0.262538	0.502446	0.435818	0.481284	0.80522	0.645725	0.58588
LNC_002196	XLOC_047171	0	0	0	0	0	0	0	0.210286	0.040579	0.068334	0	0.250703
LNC_002298	XLOC_049179	0.515026	0.179145	0.185183	0.173573	0.376576	0.165488	0.201611	0.421997	0.305086	0.276399	0.343433	0.269598
LNC_005968	XLOC_123932	0.407827	0.86757	0.756882	0.525	0.514212	0.533786	0.323031	0.463661	0.566059	0.774427	0.681663	0.746486
LNC_005419	XLOC_111390	0.877353	0.893222	0.809648	0.922868	1.06774	0.730424	1.10218	0.749996	0.964675	1.15507	1.06924	1.10137
ENSMUST00000180623.1	ENSMUSG00000097615.1	1.45131	1.31888	1.30869	1.06471	1.11437	1.21768	1.00369	1.15289	1.12667	1.38631	1.07615	1.12017
LNC_004488	XLOC_092419	0.473022	0.249585	0.200852	0.189929	0.380819	0.056534	0.315691	0.037432	0.010472	0.059895	0	0.022806
LNC_004187	XLOC_086371	2.40056	2.21079	1.9837	3.05836	1.87331	1.99753	1.66599	2.04588	2.15748	2.50664	1.95895	2.0077
LNC_006138	XLOC_126917	0	0	1.57288	0	0	0	0	0	0	0	0	0
LNC_003921	XLOC_080575	0.230149	0.167502	0.34796	0.167928	0.095389	0.075587	0.270992	0.166101	0.224737	0.463321	0.589329	0.297724
ENSMUST00000180589.1	ENSMUSG00000097063.3	1.32229	0.939079	1.35758	0.836598	0.96092	2.60679	1.55947	1.54711	1.16782	2.05135	1.68988	2.06675
LNC_006567	XLOC_136163	2.93235	1.36671	0.413862	0	1.19216	2.63438	2.01252	1.99176	2.57832	5.64662	0.734638	1.39851
ENSMUST00000200021.1	ENSMUSG00000105361.1	0.763267	2.7899	3.07347	0.228891	0.201664	4.19976	1123.39	30.7697	1153.62	3.55442	17.2719	1780.94
LNC_006246	XLOC_129219	0.510853	0.497128	0.478366	0.597	0.356193	0.362038	0.46933	0.232241	0.516328	0.847528	0.529459	0.656744
LNC_006066	XLOC_125648	0	0	0.485575	0	0.266707	0.231247	0.135838	0.157135	0	0	0	0.131944
LNC_001147	XLOC_023328	0.118257	0	0.127059	0.234964	0.409384	0.11639	0	0.105155	0.106918	0	0	0
ENSMUST00000211443.1	ENSMUSG00000097290.8	2.31646	1.11239	0.914658	0.118316	1.14139	1.00395	1.30038	1.29057	0.317395	0.465433	0.129588	1.03879
LNC_002260	XLOC_048333	0.591537	0.957045	0	0	0.396057	0.625576	0.071168	0.026645	0.809288	0.685607	1.16927	0.061102
ENSMUST00000194642.1	ENSMUSG00000104077.1	0.204128	0	0.081402	0	0.089262	0.170159	0	0	0	0.308744	0.133709	0.07461
LNC_004822	XLOC_099499	0.240286	0.533748	0.476617	0.053155	0.293925	0.617493	0.170982	0.205233	0.195248	0.310615	0.459696	0.342905
LNC_004448	XLOC_091762	0	0	0	0.162018	0	0	0	0	0.286375	0.164552	0.057894	0
ENSMUST00000181864.2	ENSMUSG00000097520.2	0.233428	0.350298	0.384056	0.447425	0.426529	0.413494	0.413755	0.335976	0.387994	0.442946	0.435505	0.481951
LNC_005184	XLOC_106523	2.79693	3.93484	2.87188	2.94165	2.2552	2.35589	2.48315	3.00927	3.1654	3.78205	4.45491	4.04829
LNC_001934	XLOC_040742	0	0.210314	0.545284	0	0.266437	0.700336	0.169754	0.447766	0.274077	0.273441	0.39439	0.122845
LNC_001874	XLOC_039280	0.509	0.352076	0.33137	0.546834	0.46912	0.394402	0.318835	0.387384	0.445245	0.626787	0.443015	0.523282
LNC_002167	XLOC_046728	0.816334	0.030154	0.556689	0.732486	0.60325	0.536597	0.56426	0.555717	0.908004	0.763114	0.81726	1.19125
ENSMUST00000177220.7	ENSMUSG00000093460.9	0.906528	0.027141	0.203485	0.180618	0.109983	0.229813	0.300999	0.315044	0.240193	0.151579	0.284666	0.14382
LNC_002342	XLOC_049762	0.206455	0.282955	0.406978	0.162099	0.026202	0.023968	0.012335	0.053938	0.410425	0	0.156662	0.387256
LNC_003311	XLOC_068367	0.147842	0.140162	0.299198	0.14491	0.201818	0.206564	0.211956	0.117119	0.209264	0.39719	0.238682	0.572091
ENSMUST00000047607.2	ENSMUSG00000039798.2	0.478855	0.152331	0.094131	0.201371	0.037801	0.121688	0.109381	0.110799	0.142778	0.190602	0.15674	0.136624
LNC_006562	XLOC_135996	0	0	0	0.146519	0	0	0	0.106406	0.161412	0.276298	0.425633	0.689225
LNC_001822	XLOC_038118	0	0	0	0	0	0	0	0	0	0	0	0.363918
LNC_003195	XLOC_066157	0.484817	0	0.099923	0	0.239394	0	0.003697	0	0.066621	0.074484	0.098047	0
LNC_000345	XLOC_006867	0.393115	0.103626	0	0.053323	0	0.04788	0	0	0.062637	0.181125	0.245362	0.179903
ENSMUST00000147294.2	ENSMUSG00000052951.5	1.29952	0	0.0321	0	0.013374	0.029405	0	0.008856	0.018068	0.063492	0.038542	0.021045
ENSMUST00000181317.2	ENSMUSG00000097635.2	0.266215	0.681391	0.467197	0.319214	0.212591	0.670409	0.260403	0.378452	0.513475	0.411423	0.601293	0.344485
ENSMUST00000181873.7	ENSMUSG00000097772.7	3.04946	3.71212	5.66652	2.92062	4.62284	4.03663	2.87425	4.96511	4.15864	5.75373	4.70003	3.83692
ENSMUST00000228976.1	ENSMUSG00000116518.1	0.403342	0.069533	0.849581	0.233965	0.408003	0.165037	0.407397	0.301532	0.337924	0.61352	0.214368	0.445851
LNC_005510	XLOC_113431	0.691013	0.591021	1.23368	0.558854	0.818657	0.990835	0.66283	0.732441	1.11207	1.19791	1.31227	0.699104
LNC_005367	XLOC_110228	0	0.101935	0.461013	0.110381	0	0	0	0	0	0	0.054238	0.012308
LNC_000133	XLOC_002457	0.331244	0.448942	0.588186	0.26906	0.38172	0.314488	0.405937	0.323825	0.392779	0.723527	0.340056	0.574439
ENSMUST00000180385.1	ENSMUSG00000097277.7	1.00578	1.42402	1.87788	1.21494	0.737555	1.14167	1.31458	1.2396	0.99249	1.35211	1.2186	1.02272
LNC_001073	XLOC_021841	0.165453	0.269034	0.162306	0.192221	0.052625	0.041632	0.044	0.172996	0.154077	0.621156	0.196355	0.280035
LNC_000462	XLOC_009093	0.140062	0	0	0	0.086315	0	0	0.317508	0.120926	0	0	0
LNC_006137	XLOC_126896	0.284382	0	0	0.251782	0.287255	0.079845	0	0	0.430102	0.046487	0.695943	0.201037
LNC_006233	XLOC_128958	0	0	0.372687	0	0	0	0	0	0.302971	0	0	0.419872
LNC_005725	XLOC_117895	0	0	0	0	0.254905	0.105179	0.253552	0.292134	0.412434	0	0.104102	0
LNC_005323	XLOC_109248	0.379075	0	0	0	0	0	0	0.093809	0	0	0	0
ENSMUST00000181232.1	ENSMUSG00000097757.1	0.360914	0.743349	0.594296	0.527738	0.653972	0.629376	0.745119	0.512741	0.459626	0.598472	0.896324	0.874664
LNC_003821	XLOC_078527	0	0.225753	0.156348	0.099737	0.181385	0.147144	0.147381	0.117791	0.624459	0	0	0
LNC_001146	XLOC_023290	38.6654	29.049	32.1157	25.6581	28.1072	25.329	26.6599	26.0253	31.8035	44.1432	22.7315	40.1639
ENSMUST00000194988.1	ENSMUSG00000044306.4	1.0656	1.28564	1.24959	1.253	1.18801	1.18273	0.971034	0.742503	1.08612	1.33606	1.34723	1.45922
LNC_001369	XLOC_028129	0.775745	0.255252	0.187499	0.283267	0.17807	0.149559	0.199643	0.115263	0.019788	0.301428	0.417343	0.16574
LNC_001216	XLOC_024056	0.748308	3.12535	3.21513	3.64559	2.41878	2.1063	2.27097	2.21587	3.61	4.32489	3.93307	3.86514
ENSMUST00000147235.1	ENSMUSG00000086382.1	0.855762	0.596186	0.977828	0.560774	1.62552	0.947643	0.899939	0.045813	0.544506	1.39172	0.552927	0.492897
LNC_001796	XLOC_037715	0	0	0	0	0	0	0	0	0	0	0	1.04222
LNC_006688	XLOC_139162	0.124271	0.266725	0.350518	0.236443	0.11732	0.206216	0.185068	0.508843	0.935655	1.33371	0.76428	0.506995
LNC_004136	XLOC_085466	0	0	0	0.114496	0.017994	0.332365	0	0	0.227535	0	0.190978	0.08395
LNC_001568	XLOC_031947	0	0.130569	0.062746	0.5589	0.238789	0	0	0	0	0	0	0
ENSMUST00000211726.1	ENSMUSG00000109744.1	1.50009	0.830428	0.51476	0.593992	0.708924	0.567958	0.666108	0.663754	0.524093	0.664473	0.539916	0.606863
LNC_000189	XLOC_003758	0	0.263651	0.791701	0	0	0	0.034265	0	0.025773	0.039776	0	0.017203
LNC_002657	XLOC_056152	0.422321	0.688857	0.213159	0.224183	0.12317	0.297623	0.207057	0.085499	0.391194	0.510048	0.603441	0.358572
ENSMUST00000181126.1	ENSMUSG00000097596.1	1.29976	1.01284	0.912665	0.772676	0.791892	0.820708	0.75119	0.826121	0.930869	0.79665	0.894347	0.96261
LNC_002585	XLOC_054909	0.174979	0	0	0	0	0	0	0	0.28866	0	0	0.145862
LNC_006757	XLOC_140589	0	0	0	0	0	0	0	0.396905	0	0	0	0.019121
LNC_000149	XLOC_002971	12.8153	7.23293	11.0611	7.33978	6.15925	6.05919	7.14478	7.44646	8.95511	11.0972	12.3967	11.9206
ENSMUST00000188983.6	ENSMUSG00000100252.6	9.84104	5.39772	3.62061	2.66213	4.39124	4.89788	3.13521	4.59968	2.91326	3.70495	2.91199	3.67926
LNC_002863	XLOC_059814	0	0	0.171961	0	0	0.321279	0	0	0.285919	0	0.211104	0.10692
ENSMUST00000230234.1	ENSMUSG00000116004.1	0.343991	0.214728	0.376428	0.518478	0.294298	0.453417	0.324233	0.387358	0.453891	0.525427	0.387686	0.394507
LNC_003273	XLOC_067263	0.085652	0.112476	0.20503	0.13887	0.081829	0.235464	0.249213	0.226582	0.141338	0.158118	0.194919	0.424637
LNC_003863	XLOC_079073	0	0.502187	0	0	0	0	0	0	0	0	0	0
LNC_006338	XLOC_131602	0.184928	0.313888	0.42514	0.23263	0.174106	0.130137	0.126867	0.196526	0.288676	0.375341	0.453066	0.389265
LNC_000790	XLOC_016560	0	0.432194	0.292475	0	0	0	0	0.37844	0	0	0.637182	0
ENSMUST00000202983.1	ENSMUSG00000106837.1	0.283862	0.520398	0.332381	0.4047	0.282688	0.306934	0.341399	0.22313	0.374288	0.220824	0.246508	0.277564
LNC_001903	XLOC_039994	0.135424	0	0.084075	0	0.249782	0.216671	0.15157	0	0.154746	0.24992	0.157604	0.082679
LNC_002221	XLOC_047489	0.498047	0.07614	0.32914	0.163581	0.142486	0.048882	0.373032	0.194936	0.07652	0.119728	0.085089	0.255965
LNC_001670	XLOC_034478	0.118735	0	0	0	0.428682	0.097321	0.162419	0	0.27459	0	0.152161	0
LNC_003677	XLOC_075710	0.616541	0.431643	0.56876	0.941245	0.549194	0.337093	0.569154	0.396773	0.863839	0.830899	0.829998	0.71684
ENSMUST00000230987.1	ENSMUSG00000100303.3	0	0	0	0	0.466337	0.225563	0	0	0.052106	0.158868	0	0
LNC_000827	XLOC_017420	0	0	0	0.074901	0	0	0.292354	0	0	0	0.27389	0
LNC_004565	XLOC_094010	0.308164	0.136511	0.45279	0.261266	0	0.210905	0.078228	0.151711	0.230587	0.136953	0.299307	0.250188
LNC_003524	XLOC_072314	0.297197	0.273382	0.157606	0.549335	0.137929	0.132563	0.170417	0.137253	0.291153	0.260973	0.137943	0.227257
LNC_001418	XLOC_029119	0	0	0.700527	0	0	0	0	0	0.161686	0	0.07141	0
ENSMUST00000126735.7	ENSMUSG00000086171.7	1.19785	1.18588	0.957267	1.07536	1.0369	1.17611	1.2396	1.27846	1.31275	1.12752	1.25657	1.02902
ENSMUST00000194502.1	ENSMUSG00000103825.1	0.046355	0.518629	0.610561	0.832942	0.177709	0.262313	0.351926	0.447603	0.284571	0.481794	0.224654	0.433619
ENSMUST00000159568.5	ENSMUSG00000090063.6	0.581922	3.10276	2.27744	2.69958	2.7855	1.95205	0.147318	2.65481	1.75432	1.95374	0.984504	2.38104
LNC_005217	XLOC_107306	0.550946	0.366722	0.168784	0.233275	0.202498	0.264239	0.043988	0.275355	0.673097	0.596101	0.33185	0.493377
ENSMUST00000173856.1	ENSMUSG00000092627.2	1.6377	0	0	0	0	0.052766	0.057341	0	0.238386	0.037372	0	0.056646
LNC_005348	XLOC_109868	0.062859	0.055433	0.23424	0.205313	0	0.061248	0.067005	0.157859	0.169354	0.527378	0.062773	0.098627
LNC_001508	XLOC_031008	0.624036	0.691296	0.763321	0.798998	0.605495	0.599897	0.552797	0.553098	0.610791	0.914986	0.808641	0.776139
LNC_004272	XLOC_088190	0	0.38527	0.503118	0.281464	0.240773	0.096599	0	0.395969	0.29971	0	0.384166	0.312972
LNC_003926	XLOC_080809	1.24451	1.06782	1.68188	1.54728	1.68567	0.90538	0.696349	0.909978	2.04754	2.83983	2.18413	2.44772
LNC_004923	XLOC_101125	0.095092	0.260803	0.101149	0.157485	0.030232	0.184282	0.065211	0.08334	0.116523	0.383219	0.323295	0.271991
LNC_000160	XLOC_003247	0	0	0	0.191287	0	0	0	0	0	0	0.317084	0
LNC_001531	XLOC_031469	0.332438	0.083142	0.194086	0.166598	0.607746	0.424077	0.255797	0.004627	0.543525	0.48374	0.179243	0.464647
LNC_001071	XLOC_021787	0.477576	0.495516	0.453564	0.713415	0.497698	0.352139	0.423948	0.342431	0.512918	0.701007	0.58747	0.636129
LNC_006236	XLOC_129043	0.090168	0.037185	0	0	0.286666	0.135665	0	0.238131	0	0.0458	0	0
ENSMUST00000181550.7	ENSMUSG00000097156.7	1.66466	2.03971	2.31389	1.45318	1.0877	1.78827	0.991204	1.82391	1.6591	2.19568	0.783085	1.63508
LNC_001204	XLOC_023954	0.252847	0.124483	0.127253	0.066811	0	0.035757	0.363837	0	0.213969	0	0.235797	0
ENSMUST00000129058.1	ENSMUSG00000109460.1	0.447061	0.751499	0.762416	1.16699	0.464692	0.691785	0.399414	0.366375	0.605893	0.684593	0.405543	0.546122
LNC_002568	XLOC_054384	0.02885	1.10482	0.568516	0.685749	0.584354	0.720851	0.574402	0.705455	0.519779	0.899782	0.53377	0.57563
ENSMUST00000219142.1	ENSMUSG00000112581.1	0.191667	0.303648	0	0.140117	0.089724	0	0	0.085913	0.088795	0	0	0
LNC_002868	XLOC_059836	1.50148	1.4009	0.737132	0.838706	0.39214	0.846619	0.463115	0.953814	0.5245	1.06791	0.989341	0
LNC_000785	XLOC_016539	0	0	0	0.059553	0.036618	0.380371	0.264487	0.129429	0.241748	0.539327	0	0.497749
LNC_006595	XLOC_136940	0.547546	0.558157	0.504834	0.394825	0.357703	0.529221	0.490389	0.642189	0.393795	0.423467	0.498436	0.25601
LNC_000771	XLOC_016306	0	0	0	2.08755	0.022047	0	1.1769	0.070546	0.887625	0.040834	0.111779	0.063465
LNC_005716	XLOC_117758	0	0	0.367585	0	0	0	0	0	0	0	0	0
ENSMUST00000210658.1	ENSMUSG00000109783.1	0.243162	0.261038	0.370734	0.052615	0.549709	0.253577	0.092876	0.164483	0.374837	0.574543	0.225053	0.274259
LNC_000088	XLOC_001502	0	0.550591	0	0	0.074279	0.299465	0.331323	0.446989	0	0.45565	0	0.341772
LNC_001925	XLOC_040510	0	0	0.456448	0	0.052232	0.059732	0	0	0	0	0	0
ENSMUST00000129102.1	ENSMUSG00000085654.1	0.158981	0.249016	0.224409	0.239071	0.200173	0.152703	0.228368	0	0.045639	0.374678	0.330074	0.15421
LNC_003152	XLOC_065393	0.034211	1.33975	1.5275	0.842792	1.23419	0.722197	1.10828	1.33394	0.006213	0.761385	1.79884	0.596682
LNC_006125	XLOC_126777	0.440623	0.437086	0.374589	0.523641	0.365167	0.369682	0.300013	0.329535	0.389063	0.402413	0.44104	0.495198
LNC_005493	XLOC_113255	0.35914	0.185701	0	1.06058	0.264489	0.056743	0.195861	0.16408	0.105165	0	0.196283	0.208342
LNC_003751	XLOC_077242	0	0.138635	0	0.13533	0.381679	0	0	0.50486	0	0	0.071619	0.108723
LNC_004841	XLOC_099768	0.121998	0.107376	0.423028	0.309486	0.23673	0.152447	0.103558	0.256092	0.471602	0.268756	0.374784	0.361534
LNC_004446	XLOC_091758	0.084435	0.065427	0	0.062371	0	0	0.190146	0.106819	0.051967	0	0.399615	0
ENSMUST00000034183.9	ENSMUSG00000031736.11	1.99183	0.144551	0.267974	0.416355	0.431774	0.893093	0.495346	0.366245	0.176625	0.644174	0.619613	0.376692
LNC_002835	XLOC_059362	0.16788	0	0.232359	0.288486	0.096457	0.262776	0	0.073809	0.272271	0.176562	0	0.444657
LNC_003105	XLOC_064569	0.108352	0	0.112285	0.05948	0	0.164361	0	0.019486	0.523827	0.343374	0.129156	0.199746
LNC_004063	XLOC_083705	0	0	0	0	0	0	0	0	0	0.672199	0	0
LNC_002544	XLOC_053639	0	0	0	0	0	0	0	0	0	0.101393	0.414842	0
LNC_002633	XLOC_055900	0.320407	0.23899	0.306542	0.448655	0.280014	0.16425	0.123334	0.203397	0.297027	0.283503	0.390482	0.286989
ENSMUST00000227351.1	ENSMUSG00000097431.2	15.6745	5.08285	5.29752	3.73007	7.50022	6.50393	7.62173	7.06225	5.90168	4.38066	4.66989	7.13742
ENSMUST00000198244.1	ENSMUSG00000106229.1	0.40685	0.5993	0.51346	0.963476	0.452506	0.439359	0.441998	0.601544	0.456315	0.755676	0.557953	0.599564
LNC_002932	XLOC_061388	1.58676	0.607439	0.600598	0.555297	0.686609	0.50297	0.482562	0.457495	0.572876	0.925725	0.421241	0.957972
LNC_005896	XLOC_122306	0.761875	0.561655	0.339689	0.642105	0.603532	0.503595	0.472545	0.543827	0.371311	0.891734	0.737629	0.772542
LNC_000493	XLOC_009751	0.134758	0.288019	0.104036	0.371753	0	0.133079	0	0	0	0.071917	0.068196	0.071432
ENSMUST00000180576.2	ENSMUSG00000097788.2	0.262079	0.508906	0.343315	0.145148	0.252222	0.247974	0.057317	0.274993	0.20802	0	0.290525	0.603664
ENSMUST00000125244.7	ENSMUSG00000087026.7	0.69245	0.677461	0.090289	0.930754	0.542466	0.540391	0.728287	0.357022	0.390998	0.744723	0.051985	0.586014
LNC_005252	XLOC_108044	0	0	0.245804	0.056082	0.32487	0	0	0	0	0	0.031916	0.295097
LNC_002150	XLOC_046509	1.94033	1.27286	0.71834	0.964979	1.41146	0.767716	0.854793	1.05868	0.720764	0.780932	1.37602	1.29475
ENSMUST00000182785.1	ENSMUSG00000098202.1	0.685759	0.685246	0.395095	0.461359	0.330121	0.532663	0.488265	0.448288	0.361645	0.525085	0.442989	0.429016
LNC_002097	XLOC_044788	0	0.190413	0.295451	0.729727	0.291657	0.127864	0.044	0.226198	0.165025	0.251039	0.350205	0.136607
LNC_003047	XLOC_063419	0.066815	0	0.177677	0.290741	0	0.048827	0	0.151029	0.031137	0.228505	0.174697	0.067723
ENSMUST00000209874.1	ENSMUSG00000109780.1	1.73549	1.08708	0.805486	0.579027	1.27195	1.04675	0.853424	0.936348	0.963114	0.757751	0.817859	0.769717
ENSMUST00000130639.1	ENSMUSG00000087478.1	2.23528	0.97326	1.08569	0.852195	0.77019	1.44202	0.418644	0.956395	0.821283	0.969581	0.90281	0.747835
ENSMUST00000180790.1	ENSMUSG00000097811.1	0.245416	0.532142	0.567063	0.35271	0.456207	0.312507	0.26337	0.388984	0.440632	0.43462	0.456793	0.493842
LNC_004666	XLOC_095868	0.186661	0.487133	0.42936	0.553694	0.407137	0.528987	0.285631	0.514788	0.392476	0.425757	0.448113	0.281635
ENSMUST00000229365.1	ENSMUSG00000116081.1	0.340688	5.18344	3.86975	3.11457	4.52909	3.99335	3.72402	3.99324	3.21988	3.61504	3.14557	3.73447
LNC_006046	XLOC_125531	0.106317	0.196344	0.094082	0.151717	0.576767	0	0	0	0.067968	0.162786	0.097889	0.243153
LNC_003233	XLOC_066605	0	0.122027	0.215427	0.189003	0.05519	0.281911	0.304297	0	0.311455	0.091409	0.31532	0.33129
LNC_002147	XLOC_046472	0.315717	0	0	0	0	0	0	0	0	0	0	0
LNC_002784	XLOC_058502	0	0	0	0	0	0	0	0	0.102546	0	0	0.352293
ENSMUST00000127817.1	ENSMUSG00000086111.1	0	0.122792	0.1555	0	0	0	0.118882	0.096542	0	0	0.072983	0.029832
LNC_002204	XLOC_047245	0.276378	0.411329	0.286661	0.653133	0.191725	0.09016	0.202056	0.480193	0.791306	0.090905	0.447443	0.382409
LNC_006225	XLOC_128840	0.278931	0.278798	0.329143	0.650603	0.377973	0.171046	0.276801	0.160005	0.326696	0.581317	0.298721	0.340062
LNC_003932	XLOC_080950	0	0	0	0	0	0	0	0	0.523967	0	0	0
LNC_003403	XLOC_070026	0.121935	0	0.097131	0.298704	0	0	0	0.142168	0.024668	0.365548	0	0.046952
LNC_001070	XLOC_021786	0.453865	0.371597	0.566845	0.458608	0.298122	0.370832	0.334044	0.362974	0.408284	0.284761	0.448361	0.483885
LNC_000888	XLOC_018943	0.574026	0.517808	0.474846	0.43313	0.479486	0.509055	0.405661	0.497206	0.828984	0.890566	0.846424	0.82153
LNC_002367	XLOC_050320	0.744084	0.894805	1.35373	1.37161	1.22412	1.20026	0.900419	1.04787	1.13269	1.60698	1.83103	1.42665
ENSMUST00000197051.1	ENSMUSG00000105950.1	0.322834	0.351225	0.379464	0.867674	0.257187	0.366798	0.191258	0.328071	0.449857	0.547517	0.216216	0.204
LNC_004213	XLOC_086845	0.485343	0	0	0.161258	0.077194	0.236584	0	0	0.095218	0.127853	0.113964	0.297157
LNC_001718	XLOC_035557	0	0.164278	0.129135	0.528715	0	0.141951	0	0.04854	0	0.15044	0.242476	0
ENSMUST00000185189.1	ENSMUSG00000098912.7	6.19772	6.43239	10.4533	4.4919	5.08739	5.42472	9.35976	5.42759	10.6264	5.27783	8.30124	8.16239
ENSMUST00000196567.1	ENSMUSG00000105771.1	4.46533	3.67216	2.71611	2.17847	2.53983	2.8289	2.15439	3.48475	2.72082	3.28987	2.57371	3.51266
LNC_002517	XLOC_053160	0	0.077669	0.378267	0	0.163456	0	0	0.14527	0.208709	0.081166	0	0.082607
ENSMUST00000218027.1	ENSMUSG00000112462.1	0.83314	0.244996	0.209518	0.111117	0.115186	0.499538	0.302438	0.636397	0.091656	0.364718	0.192288	0.213511
ENSMUST00000184554.7	ENSMUSG00000101970.6	0.075718	0.075968	0.106909	0.268922	0.068619	0.093485	0.386923	0.120488	0.290941	0.15511	0.051926	0.278425
LNC_002454	XLOC_052072	0.564148	0.723099	0.697287	1.14958	0.447085	0.818318	0.89407	0.861137	0.782103	0.904684	0.554873	0.714884
LNC_005204	XLOC_107070	0	0	0.369857	0.401789	0	0	0	0	0.096111	0	0	0.165987
LNC_005556	XLOC_114110	0.301626	0.333062	0.355648	0.479435	0.276546	0.261963	0.30643	0.428275	0.359745	0.617197	0.592791	0.690731
LNC_003408	XLOC_070070	0.324644	0.153557	0.042536	0.399068	0.217842	0.165479	0.300648	0.099615	0.426174	0.474429	0.440727	0.444315
ENSMUST00000230013.1	ENSMUSG00000097587.2	0.274244	0.742914	0.748968	0.866811	0.537388	0.546447	0.441507	0.648792	0.777234	0.811073	0.737148	0.772231
LNC_001124	XLOC_023137	0	0	0	0	0.450405	0	0	0	0	0	0	0
LNC_004915	XLOC_101019	0.165372	0.099925	0.100805	0.309541	0.135581	0.138511	0.10102	0.083427	0.212489	0.047163	0.23518	0
LNC_005817	XLOC_120262	0.449177	0	0.050315	0.010468	0.055018	0	0	0.126591	0.013124	0	0	0
LNC_006216	XLOC_128730	0	0	0	0	0	0	0.305155	0.274977	0	0.39819	0	0
LNC_005560	XLOC_114158	0.090861	0	0.595789	0	0	0	0.0613	0	0.20658	0.362564	0.41425	0
ENSMUST00000214783.1	ENSMUSG00000110993.1	0.701345	0.645718	0.540019	0.593684	0.452428	0.522308	0.544127	0.599154	0.622646	0.64092	0.377159	0.663962
LNC_006474	XLOC_134392	0	0.103634	0	0	0	0	0	0	0	0	0.359484	0
LNC_000036	XLOC_000669	23.8657	14.158	39.6768	42.2893	23.7605	18.3337	26.1427	25.4237	7.75711	18.8447	42.7605	25.3028
LNC_001264	XLOC_024873	0.10724	0	0	0.056509	0.064365	0	0	0.147904	0.32391	0.072318	0.165444	0.157197
LNC_001117	XLOC_023009	0.983009	0.507075	0.550888	0.593559	0.471845	0.600075	0.780702	0.470215	0.628261	0.955853	1.06301	0.490506
LNC_005557	XLOC_114140	0.274727	0.150351	0.348824	0.455664	0.409287	0.235733	0.664774	0.699847	0.391879	0.476423	0.282047	0.661065
ENSMUST00000132264.1	ENSMUSG00000087064.1	0.119409	0.05829	0.361776	0.309484	0.119161	0.275636	0.480068	0.256257	0.586023	0.147765	0.649807	0.350525
LNC_004886	XLOC_100367	0	0	0	0.086391	0	0	0	0	0	0.468463	0	0
LNC_002175	XLOC_046867	0.526031	0.329208	0.366508	0.548607	0.143552	0.073572	0.321949	0.398489	0.481341	0.521182	0.207361	0.172873
ENSMUST00000182258.7	ENSMUSG00000097767.8	0.967304	1.62682	0.693286	1.00045	0.880415	2.31485	0.254239	1.00669	0.998454	1.03146	1.1793	0.772397
ENSMUST00000194223.1	ENSMUSG00000103473.1	0.519507	0.837761	0.713967	0.776447	0.800012	0.755113	0.807918	0.788662	0.612895	0.670469	0.796071	0.791765
LNC_004326	XLOC_089647	0.126477	0	0	0	0	0	0	0	0.285152	0.18837	0	0
LNC_005848	XLOC_121078	0.948076	0.431217	0.426262	0.243182	0.753874	0.933406	0.807631	0.716469	0.448919	0.67424	0.428665	0.602141
ENSMUST00000178074.7	ENSMUSG00000079179.9	7.13017	5.30721	5.2767	3.95696	5.04144	4.42232	4.7072	4.90091	4.71676	4.81448	4.06838	4.25404
ENSMUST00000221207.1	ENSMUSG00000113837.1	0	0.058936	0.22358	0.197113	0	0	0	0.122817	0.123596	0.371022	0.116776	0.170929
LNC_000273	XLOC_005017	0.523231	0	0	0	0.166347	0	0	0	0	0	0	0
LNC_004368	XLOC_090637	0	0	0	0.317582	0	0	0	0	0.31774	0	0	0
LNC_004802	XLOC_098861	0.541902	0.305626	0.517416	0.437509	0.284156	0.472836	0.349284	0.222178	0.475729	0.544327	0.580729	0.443002
LNC_002266	XLOC_048532	0	0	0.003111	0.527019	0.010766	0.144468	0	0.004743	0	0	0	0.012884
LNC_001157	XLOC_023419	0.227962	0	0.399145	0	0	0	0	0.066213	0	0.098796	0	0.145275
LNC_006380	XLOC_132366	0.333927	0.263485	0.3252	0.259849	0.26523	0.162685	0.266915	0.171478	0.537302	0.418387	0.41684	0.538107
LNC_002762	XLOC_058293	0.552052	0.40054	0.318543	0.288726	0.416414	0.329633	0.42656	0.486524	0.344189	0.486589	0.505704	0.432731
LNC_006341	XLOC_131637	0.0504	0.099044	0.135327	0.222581	0.29749	0.123964	0.228964	0.298287	0.110423	0.106521	0.117411	0.137737
LNC_002186	XLOC_047006	0.353894	0.222017	0.385514	0.414307	0.226685	0.204702	0.278702	0.104684	0.256165	0.478059	0.380013	0.5221
LNC_006547	XLOC_135769	0.470672	0	0	0	0	0	0	0	0	0	0	0
ENSMUST00000173609.1	ENSMUSG00000092448.1	1.56779	1.182	1.28187	1.22448	1.14715	1.03375	1.19732	1.25262	1.10941	1.13833	0.881174	0.952187
ENSMUST00000202542.1	ENSMUSG00000106874.1	2.21198	1.94928	1.76354	1.85384	1.71288	1.95867	2.47912	1.52425	1.89662	1.61353	1.29802	1.91319
LNC_005642	XLOC_116166	4.65509	4.24765	3.98798	5.38183	2.6797	2.93811	2.23881	2.91895	4.99432	3.77337	6.75825	2.73143
LNC_006347	XLOC_131823	0	0	0.000664	0.062624	0	0	0.001133	0.024402	0	0	0	0.001039
LNC_005406	XLOC_111055	10.3797	13.6283	12.219	13.4563	11.6265	8.15444	8.79351	9.61788	14.7646	15.2626	13.763	14.8247
ENSMUST00000183089.1	ENSMUSG00000097993.7	0	0	0	0	0	0.252071	0	0.091096	0	0	0	0
LNC_005462	XLOC_112528	0	0	0.130537	0	0	0	0.159228	0.293303	0.306199	0	0	0
LNC_006315	XLOC_131038	0.69282	0.421005	0.849475	0.57497	0.752491	0.860315	0.480599	0.292424	0.362465	0.786743	0.751524	0.383576
LNC_002180	XLOC_046961	0.336431	0	0	0.434911	0	0	0.077256	0	0	0	0.274362	0
LNC_001176	XLOC_023671	0.458447	0	0	0	0	0	0	0	0	0	0	0
LNC_004849	XLOC_099948	2.00062	1.87922	2.19166	1.10312	1.77492	1.07382	1.62502	1.24249	2.31734	3.07716	2.67323	2.53459
LNC_000921	XLOC_019416	1.48412	1.36615	0.592731	0.442218	0.603582	1.14623	0.697753	0.774251	1.47547	1.00761	0.885733	0.657514
LNC_006818	XLOC_141724	0.549347	1.96726	2.76504	1.5745	1.95346	1.97826	1.67881	1.34218	2.95154	3.46016	2.24208	3.49057
LNC_002046	XLOC_043304	0.656292	0.651656	0.746276	0.642762	0.504948	0.564669	0.557855	0.659153	0.887453	0.961703	1.09652	0.952752
LNC_003011	XLOC_062805	0	0	0.06266	0.338298	0	0.122073	0.075934	0.0156	0.011103	0.084448	0	0.19679
ENSMUST00000151434.1	ENSMUSG00000039563.6	0.431885	0.495948	0.542939	0.341069	1.12075	0.768093	0.369117	0.409387	0.400549	0.488762	0.38513	0.548627
LNC_001857	XLOC_039045	0.242124	0.60654	0.482685	0.824872	0.946359	0.519639	0	0.57048	0.267897	0.744129	0.370197	0.290098
LNC_004045	XLOC_083241	0.047508	0.369534	0	0	0	0	0	0.031033	0	0	0	0
LNC_006727	XLOC_139750	0.126942	0.56769	0	0.146546	0	0.13115	0	0	0	0.2835	0	0.070397
LNC_004755	XLOC_097805	0.126905	0	0	0	0.349293	0.119375	0	0.079963	0.118308	0	0	0
ENSMUST00000198450.1	ENSMUSG00000105942.1	0.489865	1.02865	0.736514	0.788092	0.584207	0.829184	0.647246	0.995434	0.832667	0.71438	0.732238	0.996429
LNC_000197	XLOC_003836	0.419706	0.016312	0.221011	0.344493	0.642272	0.280625	0.561476	0.62643	0.376572	0.32307	1.33485	0
LNC_004130	XLOC_085442	0	0	0.193001	0	0.107045	0.103161	0	0.395206	0.100794	0.118196	0.151683	0
ENSMUST00000225910.1	ENSMUSG00000114469.1	0.114619	2.47937	1.33561	1.01257	2.28513	1.40499	1.26411	1.4408	1.34752	1.57433	1.10386	1.15064
ENSMUST00000181883.2	ENSMUSG00000097486.2	1.19459	0.831379	0.413378	0.293316	0.61307	0.356908	0.670702	0.270428	0.54034	0.26306	0.154707	0.330746
LNC_006323	XLOC_131345	0.069758	0	0.288881	0.459622	0	0	0.207999	0.200267	0.152491	0.410989	0	0.635384
LNC_005002	XLOC_102575	0	0	0	0	0.492874	0	0	0	0	0	0	0
LNC_006746	XLOC_140421	0.370292	0.121273	0	0	0.229332	0	0	0	0	0.063306	0.045399	0.104379
ENSMUST00000148522.1	ENSMUSG00000085669.1	1.01935	1.04424	1.31572	2.10851	1.05408	0.77261	0.851725	1.04976	1.70998	2.53472	1.88116	2.09474
LNC_002529	XLOC_053542	0.455308	0.396391	0.626328	0.512398	0.447314	0.386767	0.484928	0.440344	0.63952	0.738806	0.868532	0.588067
ENSMUST00000204401.1	ENSMUSG00000107795.1	0.315947	0.569768	0.119514	1.10571	0.587507	0.783398	0.203775	0.652852	0.271361	0.529187	0.27909	0.539107
LNC_004670	XLOC_095931	0.111109	0.207697	0.174301	0.325605	0	0.32181	0.093689	0.407149	0.24626	0.220447	0.564613	0.106286
LNC_002336	XLOC_049656	0	0.09371	0.378138	0.096762	0.116976	0.086597	0	0	0.079815	0	0	0.092964
LNC_005785	XLOC_119633	0.334258	0	0	0.003263	0	0	0	0.000328	0	0.005281	0.729965	0.780704
LNC_001705	XLOC_035158	0	0	0	0	0	0.166043	0.099748	0	0	0	0.31928	0
LNC_005066	XLOC_103768	0.631898	0.210784	0.324253	0.546119	0.551549	0.381056	0.361558	0.304961	0.860292	0.605464	0.805363	0.503805
LNC_005990	XLOC_124249	0.18723	0.028572	0.171744	0.281846	0.104235	0.171021	0.425518	0.060898	0.810643	0.141715	0.368976	0.144067
LNC_006383	XLOC_132408	0.326485	0.071394	0.040505	0.453258	0.083469	0.079878	0.137076	0.093611	0.115089	0	0.250484	0
ENSMUST00000222872.1	ENSMUSG00000113020.1	0.340253	0.662596	0.541315	0.730409	0.484484	0.423478	0.483015	0.598846	0.521362	0.839764	0.498482	0.586256
LNC_004861	XLOC_100145	0.33733	0.340929	0.391007	0.156939	0.300111	0.292517	0.096202	0.082142	0.274004	0.590465	0.234704	0.238992
LNC_001209	XLOC_023997	0.532421	0.111484	0.105113	0.117067	0	0.04035	0.16437	0	0.047076	0	0.025125	0
LNC_001816	XLOC_037991	0.486589	0.426409	0.339867	0.34056	0.571628	0.376528	0.359514	0.379993	0.389208	0.860112	0.511524	0.467022
LNC_004747	XLOC_097484	0.086477	0.154719	0	0.064603	0	0	0	0	0.552102	0	0	0.095354
LNC_001093	XLOC_022683	0	0.089841	0	0.137915	0	0.083022	0	0	0	0.089732	0.340356	0.132501
LNC_002404	XLOC_051268	0.164494	0	0.623563	0	0	0.303789	0.087168	0	0	0	2.21915	0.178677
LNC_001062	XLOC_021557	0.26106	0.263527	0.24991	0.35904	0.309776	0.533223	0.311844	0.233559	0.26905	0.334395	0.20442	0.410046
LNC_005127	XLOC_105429	0.245666	0.592069	0.467939	0.457632	0.35748	0.559554	0.362081	0	0.891675	1.62768	1.14736	1.67158
LNC_005967	XLOC_123928	0	0	0	0	0.301548	0	0	0	0	0	0	0
LNC_006388	XLOC_132541	0	0	0	0.174716	0	0	0	0	0	0.084499	0.360571	0.266054
ENSMUST00000170849.7	ENSMUSG00000090386.9	0.995619	0.156415	0.761012	0.186678	0.256712	0.343612	0.466886	0.278235	0.220751	1.99372	0.017715	1.93346
LNC_003461	XLOC_071131	0.617132	0.279525	0.467453	0.402057	0.411633	0.435181	0.341364	0.381968	0.657896	0.405833	0.500977	0.194335
LNC_003634	XLOC_074617	0.488814	0.515041	1.07137	1.11149	0	0.876369	1.0387	0.937543	0.818202	1.58143	2.12165	1.42114
LNC_002929	XLOC_061207	0	0.354304	0	0.262799	0.29216	0.7483	0	0.169002	0.553873	0.022269	0.274602	0
ENSMUST00000151873.1	ENSMUSG00000087114.1	0.437719	0.255598	0.478387	0.183849	0.635805	0.172532	0.23235	0.346853	0.495324	0.266353	0.305971	0.349117
LNC_006290	XLOC_130681	0.676133	0.206888	0.185954	0.133782	0	0	0	0.224459	0.152002	0.176262	0.125497	0.132756
LNC_003606	XLOC_074102	0	0	0	0	0	0	0	0	0.598423	0	0	0
ENSMUST00000130205.1	ENSMUSG00000085551.1	0	0	0	0	0	0	0	0.119355	0.120544	0	0	0
LNC_006473	XLOC_134384	0.478318	0	0	0	0	0	0	0	0.118846	0	0	0
LNC_005547	XLOC_114034	0	0.117861	0.236871	0.31717	0.202803	0	0	0.522573	0.231259	0.544406	0.210821	0
LNC_000129	XLOC_002371	0.155288	0.52596	0	0.569734	0	0	0.159676	0	0	0	0	0
ENSMUST00000126141.1	ENSMUSG00000087454.1	0.204514	0	0.050891	0	0.341434	0	0.148303	0	0.016587	0	0	0.148638
LNC_004775	XLOC_098128	0.475488	0.331492	0.320983	0	0	0.088386	0.119932	0	0.485865	0.40769	0.083386	0.098777
LNC_000247	XLOC_004597	0.149338	0.252462	0.193418	0.062036	0	0.120257	0	0	0.040724	0	0.111337	0.193004
ENSMUST00000230130.1	ENSMUSG00000116506.1	0.600311	0.856364	0.880561	0.776517	0.582555	0.779959	0.805846	0.87527	0.900878	0.812548	0.504877	0.678885
LNC_000637	XLOC_013591	0	0	0.057687	0.219948	0	0	0.200407	0	0.365285	0.142785	0	0
LNC_000553	XLOC_011581	0.404816	0	0	0.147079	0	0	0	0	0	0	0	0
ENSMUST00000193139.1	ENSMUSG00000104347.1	0.130135	0.670411	0.068493	0.745691	0.192406	0.373382	0.376318	0.254888	0.384177	0.029402	0.59358	0.109747
LNC_001632	XLOC_033575	0	0.094893	1.83292	0.28314	0.775989	0.632239	0.409245	0.291582	0.808248	1.70802	2.32175	1.17037
LNC_003728	XLOC_076701	0	0.525775	0.484459	0.659643	0	0	0.233723	0.24852	0	0.376274	0.430543	0.503073
LNC_001494	XLOC_030883	0.097957	0.139699	0.029746	0.067153	0	0.032052	0.23257	0.124087	0.172534	0.129781	0.045925	0.12261
LNC_000849	XLOC_018165	0.513801	0.510347	0.575223	0.429845	0.52412	0.455586	0.57177	0.403538	0.635309	1.04725	0.766135	0.7648
LNC_002810	XLOC_058840	0.388109	0.507151	0.454806	0.189042	0.270115	0.180553	0.256211	0.303819	0.317306	0.322085	0.506661	0.226263
LNC_006659	XLOC_138410	0.022988	0.014321	0.385371	0.011586	0	0.010404	0.008175	0.013602	0.047819	0.0358	0	0
ENSMUST00000137349.1	ENSMUSG00000087515.1	2.60232	1.12128	0.770037	1.05363	1.44662	0.711029	0.690539	1.25844	0.903963	1.54221	1.4892	1.29653
LNC_002347	XLOC_049805	0	0	0	0	0	0	0	0	0	0	0.165098	0.345413
LNC_004355	XLOC_090212	0.274903	0.556131	0.77645	0.508915	0.677385	0.303248	0.7537	0.590583	1.20711	1.20446	0.844874	0.744144
LNC_006328	XLOC_131435	0.391011	0.450148	0.642731	0.595816	0.561088	0.354283	0.270906	0.268114	0.278495	0.634133	0.457341	0.436172
LNC_004745	XLOC_097460	1.25683	1.10043	1.55967	1.05658	0.941859	1.05904	0.883321	1.01186	1.19085	1.93414	1.69151	1.5776
LNC_003270	XLOC_067242	0.697213	0.325445	0.866707	0.546959	0.718329	0.527249	0.539257	0.828318	0.494338	0.687426	0.744827	0.633011
LNC_002146	XLOC_046465	0.316458	0.343478	0.200939	0	0.159603	0.143957	0.141909	0.161061	0	0.351677	0.10294	0.109692
LNC_006116	XLOC_126644	0.054793	0	0.074019	0.070991	0.041807	0.29684	0	0.276386	0.136305	0	0	0.343885
LNC_002755	XLOC_058079	0.096492	0.094281	0.307912	0	0.092031	0.188039	0.205713	0.169887	0.259969	0.299096	0	0.224407
LNC_005536	XLOC_113622	0.941519	0	0	0	0.027717	0	0	0	0	0	0	0
LNC_002255	XLOC_048323	0.316096	0	0	0.126436	0.158511	0.008467	0	0	0.292655	0	0.337903	0.178956
LNC_005559	XLOC_114146	0	0	0	0	0	0	0	0.396003	0	0	0	0
LNC_006658	XLOC_138320	0.551497	0.244487	0.368473	0.557384	0.225796	0.277067	0.142524	0.288762	0.292496	0.315836	0.223601	0.276491
LNC_000346	XLOC_006900	0.169825	0.422234	1.30552	0.668769	0.308466	0.287042	0.07433	0.174308	0.45304	0.231399	0.181488	0.144437
ENSMUST00000215551.1	ENSMUSG00000111312.1	0.242093	0.454199	0.421325	0.864689	0.274275	0.33073	0.351844	0.378302	0.640448	0.50309	0.525107	0.254026
LNC_001860	XLOC_039076	1.8241	2.17001	2.60708	3.73512	2.07256	1.59159	1.84428	1.88507	3.25346	3.48515	3.05139	3.03426
LNC_000404	XLOC_008128	0	1.77654	0	0.403059	1.20656	0.974703	0.620026	0.244004	0.434117	0.922833	0	0.704903
LNC_005050	XLOC_103391	0.293203	0	0.156695	0.106439	0.166561	0	0	0.343672	0.03863	0	0	0.148379
LNC_003598	XLOC_073867	0.255047	0.254533	0.5041	0.290673	0.156769	0.343312	0.346281	0.240134	0.199527	0.315875	0.428578	0.425308
ENSMUST00000204449.2	ENSMUSG00000097462.7	0.127157	0.177058	0.278255	0.38157	0.001557	0.356567	0.003671	0	0.160416	0.276383	0.56733	0.16113
LNC_004434	XLOC_091624	0.234573	0	0.211918	0.193825	0.074909	0	0.160218	0.073058	0.15447	0.177832	0.07242	0.328617
LNC_005366	XLOC_110222	0	0	0.370519	0	0	0	0	0	0	0	0	0
LNC_005461	XLOC_112482	0	0.116078	0	0.330853	0.217373	0.050938	0.404905	0.025503	0.068226	0.147211	0.048392	0
ENSMUST00000200220.1	ENSMUSG00000105609.1	0.126004	0.108089	0.19257	0.430223	0.153676	0.158761	0.190151	0.268463	0.446354	0.578965	0.340071	0.208308
LNC_006564	XLOC_136055	0.248077	0	0	0.135048	0	0.418671	0	0.054688	0.066391	0.196269	0.094813	0
ENSMUST00000224044.1	ENSMUSG00000114419.1	0.861371	0.85949	0.787322	0.810013	0.634152	0.725075	0.928042	0.327905	0.760818	1.06467	0.460684	0.366138
ENSMUST00000162837.1	ENSMUSG00000089656.1	0	0	0	0	0	0	0.073199	0	0	0	0.249574	0
LNC_006102	XLOC_126373	0	0.136329	0.26883	0	0	0	0	0.190311	0	0	0.340981	0.12953
LNC_004344	XLOC_089926	0	0	0	0	0	0	0	0	0	0	0	0.378497
LNC_003210	XLOC_066413	0.323612	0.356078	0.203809	0.348521	0.252698	0.30521	0.191406	0.34271	0.487523	0.702578	0.399328	0.362183
LNC_000604	XLOC_012726	1.89293	1.0837	1.74235	0.693517	0.796641	1.18741	0.413215	0.903305	0.921518	1.83581	2.1107	1.28054
LNC_001602	XLOC_033114	0.351052	0	0	0	0	0	0	0	0.304678	0	0	0
ENSMUST00000137662.1	ENSMUSG00000085348.1	0	0.414565	0	0	0.248638	0	0	0.021993	0	0	0	0.022832
LNC_002426	XLOC_051539	0.006852	0.157605	0.084535	0.070759	0.155361	0	0.318924	0.17471	0.134347	0.188054	0.141134	0.260625
LNC_004975	XLOC_102134	0.563334	0.544114	0.770894	1.10699	0.436782	0.45269	0.410097	0.362348	0.6151	0.61984	0.386517	0.541952
ENSMUST00000218256.1	ENSMUSG00000112008.1	0.300613	0.317463	0.333938	0.61033	0.200575	0.485925	0.493571	0.359927	0.466336	0.429295	0.349799	0.315036
LNC_004876	XLOC_100286	0	0.922531	0	0	0	0	0	0	0	0	0	0
LNC_000203	XLOC_003956	0	0	0	0	0	0	0	0	0	0	0.311754	0
ENSMUST00000180871.1	ENSMUSG00000097896.1	0	0	0	0	0	0	0	0.093706	0.252053	0.1121	0.1063	0
LNC_005095	XLOC_104346	0	0.085525	0	0	0	0.290602	0	0	0	0	0.0081	0
LNC_000331	XLOC_006452	0.832415	0.552655	0.860319	0.573742	0.650323	0.605961	0.70462	0.733753	0.967835	1.07438	0.999804	1.02622
ENSMUST00000161914.1	ENSMUSG00000089797.1	0.378596	0.037568	0.057932	0.388056	0.332261	0.079357	0.105753	0.245435	0.025115	0.215368	0.406995	0.198867
ENSMUST00000180598.2	ENSMUSG00000097316.2	1.64704	1.24266	1.72935	1.21711	1.40421	1.39782	1.36265	1.34749	1.46209	1.25085	1.34452	1.32513
LNC_002911	XLOC_060797	1.07455	0.353287	0.793536	0.890073	0.460376	0.432073	0.586535	0.648954	0.954818	0.824581	0.608662	0.698305
LNC_001065	XLOC_021669	0.243858	0	0	0	0.145488	0	0.070112	0	0	0.242819	0.518139	0
LNC_000632	XLOC_013481	0.297693	0.530279	0.114518	0.11989	0.031321	0.113172	0.305233	0.177055	0.120779	0.073406	0.160313	0.171289
ENSMUST00000184126.2	ENSMUSG00000098332.2	11.3575	9.49545	12.7801	7.57507	11.6218	9.74314	10.1155	10.7842	10.2965	10.3534	11.1673	12.2563
LNC_003834	XLOC_078623	0	0	0	0.142753	0	0	0.31188	0	0	0.383559	0	0
LNC_006379	XLOC_132362	0	0.040921	0.006419	0.120546	0	0	0	0.030243	0.028406	0.030853	0.02696	1.26095
ENSMUST00000217874.1	ENSMUSG00000112639.1	1.54919	1.35469	2.28052	1.13888	1.58526	1.96698	0.947092	1.44009	2.12485	1.41748	1.16871	1.49562
LNC_000884	XLOC_018867	0.263531	0.343701	0.178361	0.437534	0.266132	0.098219	0.177907	0.17686	0.180828	0.379744	0.153816	0.282106
ENSMUST00000230187.1	ENSMUSG00000116125.1	0.569348	0.864784	1.20389	1.49676	1.02334	1.30077	0.849285	1.03136	0.359264	0.670898	1.21115	0.705928
ENSMUST00000208078.1	ENSMUSG00000108969.1	0.04871	0.117531	0.094797	0	0.115422	0	0.074339	0	0	0.091251	0	0.289807
ENSMUST00000226370.1	ENSMUSG00000115569.1	0.446161	1.80004	2.28927	2.42644	1.78964	1.65209	1.94739	1.96086	2.36035	3.01438	2.93998	1.98292
LNC_004351	XLOC_090120	0.446066	0.55622	0.8314	0.310778	0.519846	0.359599	0.355316	1.00324	0.275757	1.14161	0.579996	0.331893
LNC_006738	XLOC_140229	0	0.192655	0.209674	0	0	0.110808	0.398152	0.200224	0.136174	0.079577	0.187596	0.352374
LNC_003988	XLOC_082117	0.103809	0.164023	0.035387	0.100614	0.176278	0	0	0.406758	0.248976	0.19302	0.184571	0.096664
ENSMUST00000156418.7	ENSMUSG00000054181.11	0.267622	0.287656	0.371877	0.598457	0.456949	0.251143	0.289122	0.419173	0.437241	0.467798	0.268178	0.452655
LNC_006831	XLOC_141948	0.15609	0	0.242959	0.913734	0	0.211283	0.027731	0.137409	0.560718	0	0	0
LNC_001734	XLOC_036264	0.599683	0.748136	0.654084	0.438528	0.185922	0.418811	0.433513	0.286967	0.875235	0.606064	0.682422	0.569478
LNC_005669	XLOC_116713	0.384115	0.578591	0.581349	0.474766	0.418518	0.694541	0.467749	0.529758	0.463563	1.32779	0.765722	0.631196
LNC_003310	XLOC_068326	0	0.527334	0.581066	0.39402	0.422524	0.457477	0.246463	0.261667	0.749943	0.22112	0.924731	0.215764
LNC_002224	XLOC_047576	1.45976	2.61856	3.92995	3.41742	2.95667	2.30831	2.16257	2.0093	3.52776	4.08158	2.7986	3.12598
LNC_000716	XLOC_015435	0.062508	0	0	0.36276	0.063514	0	0.069138	0	0.048325	0.202886	0.083676	0.024511
ENSMUST00000196287.1	ENSMUSG00000104814.1	0.646001	1.18356	0.972868	1.5507	0.693317	0.935642	1.15357	1.05513	0.93769	1.6238	1.07844	1.28536
LNC_003605	XLOC_074102	2.02999	1.3137	1.37672	1.05987	1.39179	1.04843	1.2799	1.44314	0.969802	2.11074	1.6643	2.34902
LNC_002232	XLOC_047728	0	0	0	0	0.131815	0.181526	0	0.048666	0.049481	0.319621	0	0.403046
LNC_004133	XLOC_085448	0	0	0	0.621461	0	0	0	0	0	0	0	0
LNC_001745	XLOC_036477	0.411168	0.446098	0.513441	0	0.398892	0.082367	0.134071	0.376356	0.080516	0.164078	0.306524	0.02745
LNC_003771	XLOC_077470	0.338928	0.312357	0.237464	0.312683	0.542877	0.290651	0.245971	0.350926	0.538365	0.430161	0.546138	0.397892
LNC_003167	XLOC_065544	0.13127	0.129646	0.13963	0.226769	0.116854	0	0.419319	0	0.238923	0	0.088705	0
LNC_002978	XLOC_062193	0.625278	0.348432	0.262471	0.842278	0.311774	0.250946	0.412298	0.352088	0.498983	0.278214	0.379358	0.345452
LNC_000936	XLOC_019631	0.194419	0	0.148206	0.338466	0	0.009179	0	0.242196	0.012762	0.063584	0	0
LNC_000266	XLOC_004839	0.848851	0.939018	0.817071	0.992921	0.719894	0.703356	0.772309	0.653626	0.843782	1.16149	0.734404	1.01559
LNC_005639	XLOC_116136	0	0	0	0	0	0	0	0	0	0	0.361939	0
ENSMUST00000205370.1	ENSMUSG00000108591.1	13.0117	9.75691	10.8782	9.64992	10.1736	10.2125	10.5165	10.3271	10.0948	11.2485	10.6968	10.4412
LNC_000452	XLOC_008996	0.162461	0.1142	0.172808	0.470503	0	0	0	0.192047	0.212799	0.454724	0.213255	0.427451
LNC_002129	XLOC_046251	0.368729	0	0.098053	0.100364	0.08792	0	0	0.186644	0	0.23758	0.210236	0
LNC_001869	XLOC_039224	0	0.080931	0.404407	0	0.073206	0	0.163635	0	0	0.4012	0	0.231351
LNC_001351	XLOC_027660	0	0.572832	0.589733	0.608265	0.526408	0.220108	0.149999	0.359792	0.45635	0.298809	0.423219	0.346111
ENSMUST00000226451.1	ENSMUSG00000115509.1	0.806139	0.441329	0.496036	0.313865	0.460656	0.588888	0.538188	0.51208	0.658567	0.741222	0.594875	0.495169
LNC_002736	XLOC_057689	0	0	0	0	0	0	0	0.29866	0	0	0	0
ENSMUST00000199221.1	ENSMUSG00000106374.1	0.349398	0.603496	0.344719	0.142507	0.278215	0.466933	0.267433	0.284888	0.440978	0.376202	0.271537	0.459856
ENSMUST00000126238.2	ENSMUSG00000086539.8	0.281239	0.399205	0.254061	0.299099	0.172539	0.409712	0.404763	0.354859	0.277903	0.355187	0.327083	0.173312
ENSMUST00000188579.6	ENSMUSG00000100600.6	0.723087	1.19525	1.36804	1.49321	0.860383	1.13616	1.07741	0.955072	1.0286	1.16848	1.24871	1.29176
LNC_005777	XLOC_119264	0	0.555226	0	0.127592	0.111772	0	0.17697	0	0.052623	0	0	0
ENSMUST00000148087.1	ENSMUSG00000085167.1	0.16638	0.806604	0.418152	0.812329	0.701428	0.817437	0.713718	0.709933	0.820614	0.714611	0.520257	0.440082
ENSMUST00000181885.1	ENSMUSG00000097268.1	0.690032	1.0756	0.785233	0.875408	0.883532	0.806874	0.770312	0.857196	0.628193	0.878379	0.68665	0.818987
ENSMUST00000202512.1	ENSMUSG00000107276.1	0.686771	0.461422	0.328913	0.344494	0.289327	0.428534	0.501844	0.289737	0.465906	0.535875	0.495447	0.580718
LNC_001431	XLOC_029904	0	68.7609	0	0	0	0	0	0	0	0	0	0.003011
LNC_002950	XLOC_061610	0.344712	0.45205	0	0	0	0	0.616797	0	0.208603	0.286376	0.213152	0.236907
ENSMUST00000159618.1	ENSMUSG00000090031.2	1.4476	1.33041	1.42868	0.981687	0.823188	1.47018	0.909565	1.51945	1.82108	1.49626	0.871254	1.41655
LNC_000954	XLOC_019905	0.200008	0	0	0	0.328073	0	0	0.236695	0	0	0	0.251264
LNC_005561	XLOC_114226	0.386318	0.51623	0.417934	0.518781	0.369473	0.359022	0.363958	0.410522	0.473227	0.752618	0.695847	0.66911
LNC_004897	XLOC_100584	0	0.423924	0.172773	0	0	0	0.25657	0.126	0.1283	0	0.070932	0
LNC_005849	XLOC_121083	0.315178	0.056442	0.043466	0	0.367406	0.052158	0.338462	0.283839	0.040778	0.065509	0.103725	0.528572
LNC_002623	XLOC_055689	0	0	0	0	0	0	0	0.366049	0	0	0	0
LNC_006463	XLOC_134235	1.03905	0.741847	1.23177	1.77672	0.526829	0.749416	0.971267	1.74569	0.981682	1.4855	1.63478	0.467219
LNC_005603	XLOC_115274	0.16733	0	0	0	0	0	0	0.046322	0	0	0.314937	0
LNC_000926	XLOC_019499	0.451422	0	0.262623	0.215175	0.217115	0	0	0	0.267147	0	0	0
ENSMUST00000218629.1	ENSMUSG00000111990.1	1.93867	1.86554	2.53335	2.27035	1.77459	1.87599	1.95353	2.72139	1.72197	2.40619	1.98036	1.89889
LNC_002873	XLOC_059904	0.140668	0	0.086657	0	0.310806	0.07938	0	0	0	0	0	0
ENSMUST00000224734.1	ENSMUSG00000114401.1	0.243701	0.537357	0.615044	0.695045	0.446362	0.192518	0.382252	0.398401	0.383851	0.458522	0.392807	0.446321
LNC_002020	XLOC_042900	1.72278	1.0224	0.456069	0.275234	0.504562	0.24685	1.26499	0.185618	1.28082	1.85979	0.338402	1.26902
LNC_002874	XLOC_059917	0	0	0	0	0	0	0	0	0	0	0	0.49397
LNC_004160	XLOC_086000	0	0	0.354741	0	0	0	0	0.310864	0	0.041084	0	0
LNC_001704	XLOC_035105	0.477806	0	0	0	0	0	0	0	0	0	0.118417	0
ENSMUST00000203144.1	ENSMUSG00000107985.1	0	0.329854	0.792844	0.972915	0.735246	0.751132	1.14361	0.60076	1.13605	1.38818	1.30339	1.71961
LNC_001384	XLOC_028418	3.41604	2.36975	2.51268	1.27077	1.97945	1.74121	1.42491	1.09412	2.96312	3.61338	3.67172	4.42028
LNC_004419	XLOC_091521	0.518292	0.671257	0.682446	0.799547	0.445024	0.463798	0.46298	0.532845	0.690896	0.921017	0.872925	0.75102
LNC_001868	XLOC_039219	0.232617	0	0.371745	0.192115	0.512187	0	0.210143	0.349513	0.216942	0.568342	0.156356	0.869292
LNC_004001	XLOC_082289	0.371305	0.283761	0.177174	0.172241	0.185574	0.085188	0.215795	0.219808	0.511101	0.203955	0.338496	0.247843
ENSMUST00000147446.1	ENSMUSG00000085151.7	0.889637	0.034577	0.076157	0.028637	0.708074	0.62545	0.537193	0.399346	1.8772	0.136303	0.124604	0.210001
ENSMUST00000194526.1	ENSMUSG00000103529.1	1.16693	0.502526	0.605403	0.363026	0.460293	0.453698	0.619151	0.438364	0.415497	0.390639	0.588571	0.582054
LNC_006780	XLOC_141002	0.002764	0	0	0.136026	0.004745	0	0	0.291994	0.144969	0.106468	0	0
ENSMUST00000232795	ENSMUSG00000117011	0.375228	0.720994	1.24854	0.977068	0.746289	0.713246	0.925266	0.957182	0.689197	1.22323	0.72344	0.677075
LNC_000383	XLOC_007383	0.222889	0	0	0	0	0	0.022878	0	0	0	0	0
ENSMUST00000174019.1	ENSMUSG00000106797.1	0	0.276165	0	0.470748	0	0	0	0	0	0	0	0
ENSMUST00000219328.1	ENSMUSG00000101621.2	0.573476	0.379243	0.293468	0.208932	0.39148	0.369802	0.38369	0.383705	0.348754	0.322659	0.132467	0.323426
ENSMUST00000191791.1	ENSMUSG00000103409.1	0.409415	0.058002	0.101733	0.409217	0.22725	0.098096	0	0.051865	0	0.098007	0	0
LNC_001109	XLOC_022860	0	0	0.054456	0	0.04222	0.180764	0.261081	0	0	0.348731	0.145193	0
LNC_000097	XLOC_001616	0	0.039757	0.126828	0.266269	0.234491	0.062444	0.102243	0	0	0.043857	0.058631	0
ENSMUST00000196074.1	ENSMUSG00000105789.1	0.656871	0.14285	0.243922	0.135817	0.420454	0.306428	0.216774	0.325158	0.138667	0.20072	0.165244	0.44873
LNC_002857	XLOC_059753	0.538407	0.55675	0.262855	0.587509	0.445677	0.411725	0.462403	0.489892	0.434984	0.645193	0.122068	0.505976
ENSMUST00000181943.2	ENSMUSG00000107875.1	0.462579	0.263156	0.32967	0.213917	0.395485	0.391231	0.443255	0.570069	0.598665	0.643349	0.479456	0.249315
LNC_005084	XLOC_104119	0	0.063077	0.480845	0	0.114112	0	0	0.210649	0.322345	0	0.154144	0.062575
ENSMUST00000136218.1	ENSMUSG00000084915.2	0.6489	0.522561	0.331095	0.723071	0.377176	0.43126	0.449051	0.353737	0.362787	0.418183	0.496102	0.422586
LNC_001741	XLOC_036370	0.374755	0.416125	0.19668	0.35212	0.406256	0.148437	0.199999	0.208925	0.2164	0.375217	0.272482	0.281708
LNC_002041	XLOC_043266	0	0.083829	0	0	0	0	0	0.342926	0.146658	0.226253	0	0
LNC_003399	XLOC_069965	0.47734	0.298894	0.242899	0.482028	0.705152	0.29083	0.118823	0.221995	0	0.148553	0.221747	0.422017
ENSMUST00000209301.1	ENSMUSG00000110020.1	0.134097	2.17394	1.72949	1.89865	1.86039	1.43189	1.2365	1.59069	2.04187	1.44084	1.27333	1.31708
LNC_005145	XLOC_105814	0	0.463519	0.204163	0.0777	0.239631	0.327494	0.024702	0.21501	0.130544	0.102269	0.046699	0.177719
LNC_002683	XLOC_056533	0.657969	0.168625	0.166954	0.323823	0.118045	0.512139	0.529361	0.351188	0.17134	0.268157	0.25485	0.202697
LNC_000426	XLOC_008530	0.226462	0.458658	0.246053	0	0.367104	0.126302	0.118965	0.121689	0.454066	0.486033	0.639781	0.517953
ENSMUST00000071101.7	ENSMUSG00000056771.7	5.01765	6.01139	5.1971	6.59084	5.95868	5.1632	6.3287	6.46571	5.55074	5.77243	5.97929	5.56316
LNC_003765	XLOC_077428	0.417175	0.348853	0.299708	0.215883	0.102607	0.05817	0	0.268148	0.440661	0	0.636017	0.050091
LNC_006193	XLOC_128013	0.568071	0	0.115205	0.05896	0.211248	0.717968	0.288051	0.237452	0.19635	0.114061	0.533588	0.084431
ENSMUST00000135825.8	ENSMUSG00000078700.10	2.11093	2.45296	2.85098	2.33965	2.1682	2.74075	2.78021	3.04881	2.97377	2.11324	1.60407	2.77888
LNC_005523	XLOC_113566	0.143505	0.306897	0.40254	0.272165	0	0.118967	0.068467	0.382048	0	0.066424	0.208608	0.106529
LNC_005034	XLOC_103180	0.403939	0.207171	0.432585	0.629652	0.301052	0.086328	0.099569	0.638008	0.359297	1.07461	0	0.711083
LNC_006358	XLOC_131924	0.166903	0	0	0	0.238209	0.349734	0	0	0	0	0.177429	0
ENSMUST00000139469.1	ENSMUSG00000087431.1	0.946916	0.751661	0.767161	1.28082	0.622245	0.619221	0.650745	0.5613	0.988768	0.851388	0.877075	1.0006
LNC_001280	XLOC_025039	1.16107	0	0.131935	0.13282	0	0.059134	0.100139	0	0.055054	0.064344	0.211003	0.128248
ENSMUST00000174079.1	ENSMUSG00000092371.1	0	0.605598	0.376089	0.700131	0.158359	0.635572	0.341866	0.387515	0.32753	0.331459	0.496277	0.26957
LNC_004277	XLOC_088205	0.3646	0.439902	0	0.126097	0.101431	0.155021	0.118651	0.040451	0.382207	0.519406	0.484058	0.329511
LNC_000723	XLOC_015602	0.736823	0.837093	0.907962	0.708473	0.614501	0.592008	0.27964	0.444314	0.278678	1.09883	0.807549	0.168363
LNC_002376	XLOC_050427	2.76653	2.47883	2.97683	2.39544	1.08679	0.367074	1.66131	2.11751	3.16622	2.0117	2.26733	3.08267
LNC_006404	XLOC_132857	0.620727	0.825724	1.00493	1.16552	0.988594	0.953913	0.863736	1.0639	1.02567	1.53081	1.60135	1.35411
LNC_001316	XLOC_026524	0.477897	0.455685	0.425663	0.308961	0.292429	0.383593	0.214777	0.319645	0.520843	0.6339	0.567673	0.44799
ENSMUST00000159157.7	ENSMUSG00000053332.13	0.632611	1.1845	1.91041	0.734017	0.999065	0.671035	0.900896	0.674994	0.871262	1.33042	0.812979	1.03479
LNC_001976	XLOC_042134	15.5676	17.0018	13.5426	11.8671	13.1162	9.68409	12.5626	13.1748	16.3415	25.126	21.2428	22.6672
ENSMUST00000148807.8	ENSMUSG00000024845.17	0.204985	0.637392	0.482692	0.243103	0.328625	0.691002	0.347044	0.123064	0.19063	0.325207	0.523809	0.525911
LNC_005787	XLOC_119635	0	0	0	0.372209	0	0.165442	0.163987	0.245442	0.511698	0.120009	0.39792	0
LNC_000934	XLOC_019616	0.14237	0	0.317033	0.136116	0.068007	0.016401	0.038004	0.317618	0.085168	0.125404	0.304765	0
ENSMUST00000148066.1	ENSMUSG00000074235.4	1.41928	2.01387	2.65944	2.67093	2.00389	2.46457	2.60793	3.07391	2.61753	2.89939	3.14937	2.71027
LNC_005566	XLOC_114319	0	0	0	0	0.311714	0	0	0.447991	0.075917	0	0	0.137219
LNC_005361	XLOC_110151	0.507966	0.367559	0.44077	0.459693	0.29519	0.312261	0.466947	0.28252	0.683579	0.599322	0.613596	0.474258
LNC_000787	XLOC_016541	0.119423	0	0	0	0.116195	0	0	0.136658	0.191107	0	0.480243	0
ENSMUST00000185204.1	ENSMUSG00000087022.4	0.08491	2.09555	1.02978	0.930463	1.96565	1.60773	1.25201	1.77855	0.849243	0.630948	0.413573	1.09421
LNC_003844	XLOC_078697	0.094235	0.087052	0.046767	0.053786	0	0.067259	0.103563	0.13032	0.239573	0.260127	0.118894	0.670042
LNC_004410	XLOC_091373	0	0	0	0	0	0.059836	0	0	0	0	0.341783	0
LNC_001388	XLOC_028458	0.253786	0.23098	0.18168	0.183243	0.057632	0.17596	0.412401	0.529239	0.225674	0.237742	0.244911	0.149925
LNC_006530	XLOC_135340	0	0	0	0	0	0	0.37714	0	0	0	0	0
ENSMUST00000181900.1	ENSMUSG00000096983.1	0.655242	0.951652	0.564234	0.342724	0.740396	0.781364	0.898074	0.648355	0.574794	0.878727	0.725117	0.649945
LNC_004172	XLOC_086228	0	0	0.115881	0.086587	0	0	0	0.095904	0.391025	0	0	0
ENSMUST00000164716.1	ENSMUSG00000091237.1	0	0	0.156831	0	0	0	0.040182	0	0	0	0.061404	0
LNC_001748	XLOC_036558	0.006682	0	0.142142	0	0	0.006944	0	0.343503	0	0	0.080589	0
ENSMUST00000198855.1	ENSMUSG00000106093.1	0.039521	0.148318	0.485534	0.398812	0.101337	0.232159	0.637353	0.398668	0.218146	0.20979	0.298405	0.263256
LNC_001636	XLOC_033580	0.666946	0.660555	0.940006	0.562438	0.688836	0.412552	0.558104	0.624305	0.980842	0.999609	0.667254	0.843551
LNC_001798	XLOC_037727	0	0	0	0.084387	0	0	0	0	0	0	0.324007	0
LNC_005351	XLOC_109921	0.224603	0.189459	0.191604	0.246244	0.171233	0.259991	0.190896	0.17444	0.119009	0.354804	0.067289	0.271434
LNC_004501	XLOC_092713	0	0.115233	0.332389	0.255167	0.19539	0.060734	0	0	0	0	0	0
LNC_002368	XLOC_050357	0.021325	0.473709	0.076953	0.001313	0.118673	0.07453	0.171586	0.411525	0.012195	0.181203	0.214694	0.037837
LNC_000150	XLOC_003008	0	0.997379	0.080829	0.221327	0.666993	0.061375	0.251027	0	0.462835	0.685218	0.266268	0.177132
LNC_003324	XLOC_068549	0.24701	0	0	0	0	0.325965	0.900231	0	0.461324	0.474877	0	0.396972
LNC_004734	XLOC_097070	0	0.159294	0.335617	0.474036	0.265503	0.103766	0.729691	0.27994	0.268014	0.625968	0	0
LNC_001392	XLOC_028627	1.48498	1.59109	0.980513	1.61736	0.88219	1.62193	0.951694	1.39807	1.03184	1.22503	0.929591	1.33494
LNC_000901	XLOC_019206	0.551665	0.0766	0.128444	0.479227	0.041421	0.195906	0.14737	0.246695	0	0.148928	0.241725	0.131356
LNC_002990	XLOC_062490	0	0	0	0	0	0	0	0	0.286596	0	0	0
ENSMUST00000181103.1	ENSMUSG00000097146.1	0.78248	0.493867	0.482236	0.376824	0.613354	0.514499	0.452154	0.557009	0.27096	0.322346	0.218544	0.354281
LNC_000789	XLOC_016560	0.433948	0	0.129646	0.198814	0.457676	0.161518	0.211336	0.180882	0.128947	0.2547	0.690072	0.29016
ENSMUST00000189221.1	ENSMUSG00000102062.1	0.18157	0.121018	0.241923	0.161478	0.270054	0.358863	0.128966	0.403315	0.67777	0.62552	0.253671	0.058616
LNC_002395	XLOC_051058	0.191142	0.3823	0	0	0	0	0	0	0.214291	0	0	0.609512
LNC_000208	XLOC_004036	0.352164	0	0	0	0	0	0	0	0	0	0	0
ENSMUST00000194316.1	ENSMUSG00000104136.1	0.340704	0.327876	0.22561	0.626303	0.377499	0.295797	0.154886	0.253397	0.126675	0.292147	0.155676	0.161659
ENSMUST00000187361.2	ENSMUSG00000097786.3	0.318228	0.275572	0.489609	0.586323	0.213659	0.343179	0.278591	0.410148	0.301103	0.362396	0.298157	0.480158
ENSMUST00000199799.1	ENSMUSG00000105349.1	0.306856	0.197057	0.059787	0.24421	0.227669	0.251756	0.272611	0.24369	0.440893	0.400664	0.157165	0.210923
LNC_005007	XLOC_102652	0	0	0.296842	0	0	0.058288	0.094309	0	0.043018	0	0	0
LNC_002497	XLOC_052997	0.702295	0.048631	0.776288	0.935811	0.4977	0.593573	0.372873	0.336529	0.380607	0.537876	0.00105	0.830614
LNC_006018	XLOC_124778	0	0.082989	0	0	0	0.383447	0	0.069287	0	0	0.078599	0.082328
LNC_004988	XLOC_102388	0.209777	0.229519	0.081978	0.04358	0.227576	0.088342	0.112613	0.113337	0.093873	0.339489	0.329544	0.336078
LNC_003688	XLOC_075943	0.036013	0.186738	0.342513	0.203784	0.171675	0.317102	0.272699	0	0.254118	0.281767	0.321796	0
LNC_006414	XLOC_132938	0.192423	0.120132	0.089874	0.247132	0.221089	0.183745	0.123143	0.204781	0.278523	0.564153	0.133089	0.149842
LNC_005208	XLOC_107121	0	0.433977	0	0.087075	0	0	0	0	0	0.350989	0.092404	0
LNC_000518	XLOC_010896	0.177609	0	0.110218	0	0.119188	0.124325	0.314666	0	0.33386	0	0	0.355935
LNC_002513	XLOC_053117	0	0	0.198372	0	0.394029	0.021861	0.275956	0	0	0	0.44208	0
LNC_004675	XLOC_096007	0	0	0.399145	0.079532	0.062772	0	0	0.306993	0	0.172299	0	0
LNC_005956	XLOC_123723	0.30326	0.207511	0.463701	0.410796	0.184993	0.110439	0.444217	0.32136	0.376636	0.358628	0.548406	0.454148
LNC_006560	XLOC_135996	4.10454	2.86331	4.11791	0.48588	1.73071	2.28342	2.07784	1.3858	0.4271	0.381823	0.688332	0.595023
LNC_001834	XLOC_038597	0.09933	0.314203	0.207438	0.108146	0.189475	0	0.105882	0.174884	0	0.098331	0.167308	0.410063
LNC_003478	XLOC_071499	0.322571	0.198404	0.114372	0.107187	0.180506	0.052384	0.278238	0.117977	0.192323	0.056015	0.329747	0.168708
ENSMUST00000197258.1	ENSMUSG00000105265.4	9.18357	5.29052	3.56217	4.43412	2.66821	4.58685	3.25671	2.32131	4.02331	2.88353	3.22944	3.89235
LNC_002977	XLOC_062192	0	0	0.0842	0	0	0	0	0.37764	0	0	0.307267	0.130272
LNC_004890	XLOC_100444	0.321961	0	0.135712	0	0	0	0	0	0.139848	0	0	0
LNC_003451	XLOC_070846	0.12239	0	0	0.60873	0	0	0.131558	0.022804	0.327879	0	0	0.42498
ENSMUST00000133963.1	ENSMUSG00000087367.1	0.734954	1.3544	0.633268	0.684915	0.816126	0.387157	0.726431	0.67408	0.523658	1.36686	1.0793	0.993498
LNC_002971	XLOC_061847	0.489066	0.391508	0.469713	0.857128	0.565006	0.55602	0.403319	0.503856	0.71602	0.917044	0.737964	0.736584
LNC_005451	XLOC_112360	0.222575	0.23088	0.135605	0.097161	0.546758	0.140393	0.135895	0.223708	0.173467	0.315714	0.222587	0.229891
LNC_004113	XLOC_085003	0.284307	0.09587	0	0	0.449527	0.086492	0	0	0	0	0.09464	0
LNC_006248	XLOC_129260	0.995442	0	0	0	0	0	0	0	0.096441	0	0	0
LNC_004976	XLOC_102134	0.094873	0.131762	0	0.040339	0.151372	0.027003	0.011953	0.171098	0.138446	0.435092	0.347166	0.170161
LNC_006399	XLOC_132750	0	0.010691	0.131978	0.047509	0	0	0	0	0.256636	0	0.041935	0
LNC_001740	XLOC_036358	0	0	0.195706	0.086674	0.121461	0.085374	0.147942	0.371009	0.096999	0.186353	0	0
ENSMUST00000233078	ENSMUSG00000117250	0.535005	0.543303	0.530202	0.634347	0.843553	0.633207	0.363471	0.362898	0.39954	0.585136	0.502061	0.369689
LNC_005247	XLOC_108008	0.460989	0.285325	0.165043	0.285715	0.310713	0.151908	0.243676	0.155352	0.139822	0.11696	0.244552	0.234585
LNC_003381	XLOC_069651	14.6233	16.8271	25.1491	16.5677	16.629	11.4562	16.0978	10.1854	13.1609	21.6641	44.8123	19.1265
LNC_004795	XLOC_098684	0	0	0.120619	0	0.360958	0	0.126396	0.354447	0	0	0	0.10142
LNC_005932	XLOC_123279	0	0	0	0	0	0	0	0.301413	0	0	0	0
LNC_006139	XLOC_126917	4.60346	5.28765	3.36058	5.27453	4.32044	3.07857	3.57896	3.82248	5.52426	7.07378	6.32769	6.16499
LNC_005756	XLOC_118445	0.262854	0.399855	0.324469	0.353356	0.299983	0.254914	0.258537	0.293832	0.436032	0.350024	0.504044	0.430997
LNC_003989	XLOC_082118	0.067057	0.129626	0.075973	0.229455	0	0	0	0	0.027702	0.070619	0.120091	0.41992
LNC_003164	XLOC_065539	0.176342	0.124667	0.085413	0.351776	0.111855	0.027011	0.187138	0	0.422137	0.338819	0.205256	0.252986
LNC_000447	XLOC_008889	0.617338	0.582071	0.594399	0.727652	0.429217	0.464673	0.45784	0.425659	0.568149	0.712871	0.548429	0.707368
LNC_004135	XLOC_085454	0.112916	0	0	0	0.323087	0.110023	0	0.241879	0.202813	0	0	0
LNC_000836	XLOC_017708	0	0	0.412005	0.086169	0.040705	0.062225	0	0.07941	0.043264	0	0	0
LNC_002860	XLOC_059807	0.851851	0.706137	0.894938	0.66607	0.828721	0.642941	0.629189	0.683273	0.731268	0.931228	0.904529	1.11636
LNC_002732	XLOC_057643	0.245365	0	0	0	0	0.160225	0	0	0	0.184183	0.120451	0.370506
ENSMUST00000174287.1	ENSMUSG00000092274.2	28.762	8.50096	9.76049	10.6643	9.89529	15.197	15.0548	13.5667	12.7158	15.5668	14.375	12.3654
LNC_003532	XLOC_072470	3.16843	1.68712	2.14666	1.88923	1.59572	1.74596	2.0352	1.85605	3.31812	2.78141	3.19552	3.47264
ENSMUST00000144818.1	ENSMUSG00000055494.5	0.565687	0.328169	0.710612	0.856369	0.359009	0.579565	0.490926	0.605907	0.425697	0.570616	0.370727	0.341826
LNC_005353	XLOC_109975	0	0	0	0	0	0	0	0.296075	0	0	0	0
LNC_004186	XLOC_086369	0.157538	0.494753	0.764293	0.467684	0.72535	0.402685	0.429431	0.419486	0.310246	0.621115	0.41542	0.869277
LNC_000034	XLOC_000662	0.173461	0.062357	0.193275	0.484442	0.163607	0.163451	0.105102	0.089756	0.221916	0.241452	0.180592	0.207349
LNC_000510	XLOC_010582	0	0	0	0.503486	0	0.183741	0	0.103962	0.138434	0	0	0
LNC_002005	XLOC_042696	0.142927	0.070504	0	0	0	0.332655	0	0	0.052487	0.182208	0	0.090792
LNC_004203	XLOC_086642	0.516423	0.293643	0.354851	0.539899	0.223752	0.175701	0.273728	0.20468	0.405704	0.48863	0.622226	0.8714
LNC_006210	XLOC_128525	0	0	0	0.10637	0	0.090458	0	0.318539	0	0.079394	0	0
ENSMUST00000233314	ENSMUSG00000117172	3.89068	6.46969	5.9157	2.82533	5.30406	4.33048	3.27566	4.61281	5.29542	4.25844	4.77133	4.60273
LNC_005087	XLOC_104202	0.608798	0.575724	0.58391	0.602267	0.474712	0.371965	0.409914	0.637882	0.759141	0.803444	0.78869	0.812524
LNC_002001	XLOC_042649	0	0	0	0	0.057747	0	0	0	0.358117	0.183205	0	0.140285
LNC_006021	XLOC_124827	0.536301	0.400156	0.582379	0.619396	0.542024	0.343127	0.344675	0.460446	0.723941	0.780684	0.629265	0.811721
LNC_006372	XLOC_132293	0.596684	0.650131	0	0.106481	0.065996	0.108016	0.181192	0.348407	0	0.231884	0.176134	0.169454
LNC_004689	XLOC_096205	0.518789	0.200304	0.040243	0.091316	0.147178	0.310589	0.028496	0.216503	0.377038	0.291337	0.380348	0.372211
LNC_006415	XLOC_132952	0.02526	0.266316	0.416095	0.424173	0.434573	0.325192	0.297746	0.304771	0.542926	0.48756	0.25394	0.424026
ENSMUST00000137343.7	ENSMUSG00000086290.8	0.773899	1.3191	0.407841	0.473648	1.09142	0.579477	0.970323	1.07925	1.60133	1.48779	1.63249	1.66622
ENSMUST00000184429.1	ENSMUSG00000098659.7	2.63161	0.222997	0.558888	0.187717	0.072878	0.166041	0.491762	0.30058	0.210502	0.355639	0.1393	0.335231
LNC_005680	XLOC_117053	0.602332	0.547738	0.598546	0.428589	0.355588	0.411696	0.474322	0.32574	0.46491	0.532576	0.540355	0.517577
ENSMUST00000220575.1	ENSMUSG00000113330.1	0.572824	1.38832	0.573218	0.604282	1.21343	1.14028	1.12428	0.494706	0.723269	0.97402	0.485979	1.15147
ENSMUST00000176921.1	ENSMUSG00000093565.1	10.2356	8.1509	8.54531	3.97274	6.3599	9.01778	8.3753	8.01927	7.01513	8.46178	7.73057	7.20456
ENSMUST00000181094.1	ENSMUSG00000097610.2	0.420921	0.516045	0.352628	0.655694	0.483993	0.454638	0.441224	0.543184	0.525986	0.369025	0.555349	0.512154
ENSMUST00000180555.1	ENSMUSG00000097428.1	15.2534	13.9887	12.6994	15.9005	13.0837	13.0372	11.2293	11.4358	12.5056	14.2595	9.82859	13.8782
ENSMUST00000177296	ENSMUSG00000093734	2.3018	2.69586	3.22683	3.79776	1.10835	2.68192	3.03339	1.83096	2.23247	3.32929	2.6328	3.43737
ENSMUST00000186345.1	ENSMUSG00000100826.6	2.31791	2.69543	2.45569	3.08616	2.16637	2.21065	2.13811	2.01471	2.13753	2.17868	1.85059	2.41729
ENSMUST00000174464.1	ENSMUSG00000092203.7	1.21655	1.53941	0.824013	0.464525	0.558497	1.15095	1.67359	0.744657	1.08989	1.21447	0.763667	1.07093
LNC_006506	XLOC_134911	0.233094	0	0.028012	0	0.316375	0	0	0	0.29488	0.418375	0.026299	0.069747
ENSMUST00000160935.1	ENSMUSG00000089983.1	0.106141	0.654617	0.263155	0.343377	0.391379	0.378981	0.352988	0.424657	0.285966	0.311313	0.207989	0.702916
ENSMUST00000206533.1	ENSMUSG00000108456.1	0.548176	0.696976	0.602267	0.960853	0.533462	0.579738	0.680799	0.443544	0.580333	0.499575	0.341309	0.520192
LNC_003140	XLOC_064992	0.999619	0.494348	0.531942	0.456274	0.441867	0.355415	0.288523	0.419174	0.428352	0.560579	0.352144	0.231252
LNC_003790	XLOC_077750	0.532345	0.744714	0.976442	0.717504	0.629227	0.498205	0.490865	0.729306	0.676087	1.3806	1.23666	1.10461
LNC_001433	XLOC_029904	0	0	0	0	0	0	0	0	0	2.52529	0	0
LNC_005420	XLOC_111393	0.889424	0.745987	0.558627	0.615778	0.649764	0.532658	0.449859	0.634315	0.572002	0.577759	0.712284	0.704592
LNC_003678	XLOC_075740	0.073167	0	0.19781	0.169944	0	0.088099	0	0	0	0.097349	0.310975	0.053031
ENSMUST00000192778.1	ENSMUSG00000103114.1	0.122036	0.903393	0.221565	0.256574	0.515172	0.498813	0.331521	0.423533	0.197498	0.38072	0.18771	0.323689
ENSMUST00000207479.1	ENSMUSG00000109574.1	0.296015	0.956576	0.539916	0.831962	0.515063	0.713096	0.38123	0.662607	0.431	0.647678	0.439504	0.649111
LNC_001779	XLOC_037242	0	0	0	0.019633	0	0	0	0	0	0.050058	0.334223	0
LNC_004626	XLOC_095245	0.717003	0.329452	0.294936	0.201171	0.340147	0.379588	0.361255	0.310619	0.229674	0.345133	0.334132	0.305687
ENSMUST00000208097.1	ENSMUSG00000108912.1	0.116505	0.446776	0.274824	0.517989	0.19627	0.266843	0.29904	0.318921	0.262969	0.414774	0.195525	0.288571
LNC_005072	XLOC_103916	0.105399	0.306243	0.013498	0.045657	0.268814	0.004303	0.053803	0.037478	0.639927	0	0.101153	0.090386
LNC_000144	XLOC_002783	0	0	0	0.187253	0	0	0	0	0	0	0.343507	0
LNC_004569	XLOC_094104	0	0	0.34065	0	0	0	0	0	0	0	0	0
LNC_006041	XLOC_125381	0.971543	1.39441	0.093805	0.24044	0.02243	0.609377	0.182135	0.188909	0.270268	0.202387	0.444995	0.336317
ENSMUST00000126380.2	ENSMUSG00000086290.8	1.65603	3.44013	2.36203	2.31176	1.36785	3.25895	3.12183	2.43069	2.41071	2.70825	2.34122	3.33597
ENSMUST00000229446.1	ENSMUSG00000115923.1	2.2693	1.50154	1.67828	0.605128	1.08974	0.752906	0.626996	0.782809	1.44368	1.72936	1.44869	1.26184
LNC_000548	XLOC_011510	0.64678	0.496496	0.174333	0.443186	0.118912	0.18452	0.524274	0.338214	0.06075	0.09436	0.170591	0
LNC_006252	XLOC_129394	0.462441	0	0	0	0	0	0	0	0	0	0	0
LNC_004360	XLOC_090396	0.659689	0.281091	0.287086	0.215901	0.351883	0.331499	0.169648	0.381726	0.320992	0.678435	0.29482	0.432963
ENSMUST00000194104.1	ENSMUSG00000103103.1	3.23565	3.27189	3.98521	2.92581	2.81742	3.44511	3.42582	3.19088	3.47341	3.55801	3.59348	4.14272
LNC_005684	XLOC_117112	0.187695	0.703824	0.221997	0.663963	0.368296	0.324285	0.131406	0.238722	0.464329	0.219646	0.291788	0.239703
ENSMUST00000220837.1	ENSMUSG00000113029.1	4.21824	1.087	1.98437	2.90459	1.49466	2.66487	2.30537	1.58836	1.38098	1.91634	1.53623	1.77828
LNC_005250	XLOC_108021	0	0	0	0	0	0	0.047073	0	0	0.033252	0.409178	0.115023
LNC_005118	XLOC_105271	6.70095	8.76394	8.90421	8.54924	7.85966	6.51146	5.62865	6.46427	8.20421	10.6177	8.48092	8.95659
LNC_001383	XLOC_028418	0.554831	0.495935	0.805424	0.342545	0.671162	0.533644	0.399247	0.649252	0.450727	1.14983	0.94295	1.105
ENSMUST00000150364.2	ENSMUSG00000087331.8	0.825072	0.469768	0.143421	0.378356	0.232483	0.259121	0.149496	0.238835	0.195331	0.218948	0.108462	0.427306
LNC_006143	XLOC_127008	0.24804	0.278376	0.525219	0.276473	0.565757	0.149005	0.235421	0.37216	0.686009	0.370897	0.697404	0.689953
LNC_006719	XLOC_139720	0	0.349738	0	0.090283	0	0	0	0.072999	0	0	0	0.086739
LNC_000138	XLOC_002659	0	0.359363	0	0	0	0	0	0	0	0	0	0
ENSMUST00000133675.1	ENSMUSG00000086424.1	0.271844	0.359747	0.285948	0.059992	0.208476	0.241547	0.363133	0.22308	0.405205	0.274422	0.325543	0.51791
LNC_005277	XLOC_108520	0	0	0.351248	0	0	0	0	0	0	0	0	0
LNC_005518	XLOC_113547	0.15609	0.185572	0.138138	0.226592	0	0.061444	0.066554	0.109927	0.130274	0.384156	0.063568	0.383906
LNC_000555	XLOC_011646	0.630578	0.241334	0.53236	0.567266	0.402414	0.350713	0.420271	0.554685	0.72947	0.606552	0.819196	0.700541
[truncated: 7,347 more rows]

## Sheet: TUCP
TUCP_id	Gene_id	control1.fpkm	control2.fpkm	control3.fpkm	control4.fpkm	control5.fpkm	control6.fpkm	surgery1.fpkm	surgery2.fpkm	surgery3.fpkm	surgery4.fpkm	surgery5.fpkm	surgery6.fpkm
TUCP_004332	XLOC_103992	0.04154	0.179601	0.208595	0	0	0.174244	0	0.407772	0	0.295293	0	0
TUCP_000163	XLOC_004560	0.984386	0.031129	0.059907	0	0	0.017342	1.0238	0.012478	0	0.024511	2.34784	0.026566
TUCP_005214	XLOC_124241	0.291146	0.240373	0.338542	0.280989	0.150987	0.203554	0.194692	0.309931	0.330647	0.454444	0.426291	0.523101
TUCP_005501	XLOC_130901	3.27075	10.6042	10.9514	11.1804	10.2828	7.65441	7.69885	8.2161	13.7679	10.973	9.98785	11.9886
TUCP_005233	XLOC_125242	0.273244	0.36427	0.336397	0.044569	0.065045	0.146838	0.201416	0.116227	0.271648	0.386198	0.493089	0.158928
TUCP_003844	XLOC_095522	0.12132	0.287292	0.229957	0.56123	0.248134	0.065713	0.38257	0.293511	0.45815	0.550314	0.521647	0.226233
TUCP_000423	XLOC_013219	0.319952	0.37966	0.270404	0.16196	0.218633	0.43332	0.072948	0.088483	0.924964	0.395713	0.600873	0.911247
TUCP_004104	XLOC_100290	0.657945	0.467856	0.447958	0.523593	0.544215	0.462457	0.330182	0.354836	0.420044	0.662031	0.507759	0.467375
TUCP_004187	XLOC_101590	0.666331	0.797508	0.676652	1.07413	0.620631	0.578972	0.54399	0.555571	0.908162	1.04075	0.829581	0.983938
TUCP_001341	XLOC_033523	0	0.013498	0.001403	0	0	0	0	0	0	0.377053	0	0
TUCP_004270	XLOC_103304	0	0	0.000459	0.424473	0	0.405799	0.24112	0	0.035523	0.58311	0	0.297759
TUCP_004483	XLOC_107451	0.720037	2.2747	1.64704	1.68193	1.52921	1.64432	0.702439	0.903282	1.65712	1.53702	1.73321	1.91868
TUCP_003287	XLOC_079343	0.798548	0.49158	0.378324	0.42578	0	0.467827	0.362447	0.452954	0.610368	0.553019	0.202167	0.849917
TUCP_001256	XLOC_030989	0.730229	0.690149	0.608569	0.276937	0.503517	0.498225	0.448101	0.41003	0.597911	0.648887	0.912785	0.906322
TUCP_004221	XLOC_102486	0	0	0.287985	1.06597	1.16418	0.809893	0.999509	0	0.500012	1.39109	0.500299	0.848792
TUCP_001224	XLOC_030619	1.04813	1.06715	0.964266	0.952622	0.994131	0.701571	0.716613	0.891017	1.50924	1.4802	1.67189	1.85571
TUCP_005396	XLOC_128816	0.647015	1.06204	0.836196	1.16319	1.10187	0.804222	0.975972	0.668198	1.24009	1.68117	1.38496	1.15539
TUCP_001356	XLOC_034404	0.019022	0.360685	0.128475	0.393284	0.126996	0.129616	0.323746	0.157126	0.298721	0.349997	0.683215	0.298125
TUCP_002337	XLOC_058368	0.301585	0.286796	0.303068	0.435788	0.292211	0.598944	0.713791	0.265474	0.62934	1.1959	0.639236	0.390562
TUCP_003167	XLOC_076837	0.969467	0.441118	0.683731	0.51033	0.442736	0.412613	0.442611	0.440302	0.878998	0.516978	0.644977	0.575974
TUCP_002105	XLOC_053429	0.049136	0.387828	0	0	0.135702	0	0	0	0	0.063058	0	0
TUCP_003879	XLOC_095759	0.199441	0.249479	0.293493	0.14792	0.168444	0.281319	0.170469	0.141593	0.334432	0.307183	0.404012	0.513461
TUCP_002163	XLOC_055046	0.306729	0.752623	0.751384	0.643068	0.265214	0.783887	0.315101	0.382589	0.16603	0.94135	0.435705	0.558882
TUCP_001555	XLOC_040606	1.19402	1.80332	1.93347	1.79244	1.75295	1.46724	1.60946	1.68807	2.12528	1.95338	2.02821	1.82386
TUCP_000905	XLOC_022465	0.625277	0.625718	0.483861	0	0	0.063291	0.933622	0.523672	0.703714	0.745518	0.678813	0.662659
TUCP_001079	XLOC_024765	0.350898	0.243753	0.18034	0.301799	0.23391	0.284905	0.196986	0.174752	0.354522	0.506766	0.261174	0.297849
TUCP_003595	XLOC_090457	0.207116	0.400849	0.350307	0.047271	0.027205	0.275499	0.006922	0.038095	0.579868	0.635879	0.011407	0.449876
TUCP_005846	XLOC_140437	0.55977	0.772617	0.84363	1.0951	0.626068	0.462289	0.578731	0.664923	0.659209	0.898516	0.643065	0.705981
TUCP_003374	XLOC_082416	0.50016	0.050711	0.207268	0.121462	0	0	0.118918	0.147312	0.082564	0.17623	0.090196	0.126224
TUCP_005565	XLOC_132745	0	0.034091	0.285751	0.012274	0.407402	0	0	0.222879	0	0	0	0.027938
TUCP_003722	XLOC_092398	0	0	0	0	0	0	0	0.465357	0	0	0	0.738813
TUCP_003267	XLOC_078808	0	1.32171	0	0	0	0	0	2.42622	0	0	0	0
TUCP_004484	XLOC_107451	1.10448	0.148101	0.613421	0.728659	0.683177	0.070758	1.09756	1.17228	0.892692	1.32156	0.698875	0.726014
TUCP_005048	XLOC_120522	0.677583	1.35326	0.627775	0.781535	0.948637	0.513017	0.169258	0.677644	0.855893	0.45595	0.6409	1.59117
TUCP_000592	XLOC_017014	0.03069	0.658386	0.798794	1.0718	0.812494	0.199042	0.20922	0.568925	0.559612	0.826944	0.467254	0.670171
TUCP_002159	XLOC_054879	0.382146	0.70418	0.658071	0.895612	0.685673	0.486239	0.470482	0.522869	1.01649	0.951656	0.742346	0.774558
TUCP_003497	XLOC_086776	0.224889	0.250855	0.44821	0.430684	0.308861	0.310013	0.301489	0.327679	0.584707	0.487912	0.460433	0.426172
TUCP_000386	XLOC_012289	0.470455	0.609139	0.443683	0.49678	0.406489	0.341113	0.39651	0.499775	0.651168	0.690928	0.77071	0.701918
TUCP_003192	XLOC_077388	0.520216	0.952922	0.727092	0.972667	0.705215	0.483759	0.49465	0.467979	0.764357	0.847456	0.75023	0.894018
TUCP_002466	XLOC_061580	0.594178	0.192864	0.447257	0.287293	0.317829	0.274803	0.183254	0.319793	0.348821	0.458488	0.36798	0.333554
TUCP_000253	XLOC_007844	0.435619	0.578745	0.419993	0.607852	0.284618	0.414326	0.402411	0.386942	0.196798	0.545032	0.335987	0.387654
TUCP_005550	XLOC_132489	0.346728	0	0.068644	0	0.249679	0	0.121883	0.162396	0	0.280565	0.416061	0.145267
TUCP_001633	XLOC_042939	0.432729	1.34471	1.42411	1.77011	1.7005	1.00398	1.60415	1.4632	3.54081	0.482882	1.88795	2.38181
TUCP_003494	XLOC_086735	0.484544	0.405422	0.363422	0.333925	0.303194	0.191281	0.254629	0.221376	0.414818	0.348432	0.22683	0.234513
TUCP_000244	XLOC_007293	0.490982	0.511023	0.000466	0.004244	0.556957	0.046118	0.411607	0.001528	0.159388	0.014831	0	0.658357
TUCP_003541	XLOC_088630	0.960912	0.597917	0.975213	0.590987	0.785545	0	0.866031	0.514321	0.68758	0.685384	0.163921	0.765832
TUCP_002952	XLOC_072348	2.00243	0.841295	1.07991	0.924276	0.752906	0.780782	0.839252	0.883883	1.37914	1.49724	1.52013	1.88965
TUCP_003792	XLOC_094061	1.25116	0.372248	0.394968	0.315424	0.248082	0.292275	0.199883	0.360562	0.506262	0.56468	0.407046	0.270401
TUCP_000613	XLOC_017247	0	0	0.000754	0	0	0.023161	0.000183	0	0	0.520753	0	0.079812
TUCP_001462	XLOC_038683	0.029298	0.818577	0.721488	0.755506	0.60427	0.413549	0.49177	0.547527	1.01086	0.960412	0.640744	0.917002
TUCP_002808	XLOC_068651	1.16894	1.35805	1.68049	2.12117	1.25176	1.31554	1.05067	1.17943	2.12597	2.73761	2.48398	2.14954
TUCP_001308	XLOC_032847	0.634901	0.100882	0	0.468553	0.212786	0	0.452002	0.309777	0.321955	0.763229	0.230963	0.391554
TUCP_000742	XLOC_019967	0.340219	2.02751	2.15539	0.38742	0.660336	0	0.4817	0	0.059184	0	0.949917	0.935331
TUCP_003083	XLOC_075377	0.309352	0.440478	0.400419	0.49338	0.322697	0.348774	0.318851	0.265476	0.38387	0.329233	0.487373	0.551143
TUCP_002064	XLOC_052450	0.205408	0.402935	0.370065	0.229321	0.225468	0.239866	0.309968	0.334626	0.257117	0.50542	0.363253	0.392457
TUCP_004242	XLOC_102817	0.708453	0.155897	0.171453	0.195335	0.106678	0.195862	0.142166	0.082007	0.296642	0.257356	0.26515	0.2
TUCP_001634	XLOC_042987	0.275648	0.467946	0.38719	0.514787	0.416973	0.084443	0.174106	0.223126	0.320004	0.439536	0.412322	0.626307
TUCP_005170	XLOC_123569	0.505189	0.32066	0.229693	0.465677	0.198404	0.294213	0.081228	0.146721	0.548892	0.283693	0.315862	0.563896
TUCP_000220	XLOC_006905	0.450831	0.436139	0.37535	0.227708	0.40177	0.295469	0.339324	0.282173	0.400061	0.46971	0.397666	0.336607
TUCP_002078	XLOC_052910	0.200591	0.126903	0.191745	0.087358	0.131881	0.25161	0.042764	0.035317	0.270096	0.105624	0.379935	0.335715
TUCP_003441	XLOC_085201	0.902261	0.744288	0.796364	0.787924	0.530623	0.474549	0.495354	0.530177	0.615371	0.775767	0.751232	0.66424
TUCP_005545	XLOC_132176	1.29219	1.58109	1.14024	1.93546	0.862007	1.15173	1.1947	0.803854	0.458547	1.93307	1.46329	1.77349
TUCP_005864	XLOC_140944	0.778631	0.456203	0.508769	0	0	0.367963	0.225243	0.417211	0.421259	0.696453	0	0
TUCP_000625	XLOC_017364	0.453386	0	0	0.397995	0.274116	0	0	0	0.223766	0.220331	0.359887	0.235226
TUCP_004577	XLOC_110088	0.41122	0.411671	0.573848	0.269385	0.332017	0.390038	0.364496	0.373332	0.540832	0.452505	0.273863	0.447383
TUCP_005370	XLOC_128380	0.266115	0.313794	0.307574	0.376783	0.301187	0.277277	0.223234	0.323246	0.305072	0.463937	0.372447	0.326503
TUCP_000365	XLOC_012109	0.671492	0.500785	0.476363	0.859563	0.218801	0.164597	0.276285	0.22093	0.419693	0.405367	0.330226	0.547808
TUCP_003150	XLOC_076431	0.339313	0.861107	0.659643	1.29716	0.650037	0.19831	0.567297	0.344235	1.17676	1.0265	0.703663	1.27119
TUCP_004703	XLOC_112785	0.078623	0.04145	0.041815	0.382211	0.168348	0.232187	0.167618	0.138427	0.306884	0.265814	0.387476	0.205603
TUCP_001523	XLOC_040211	0.499444	0.695306	0	0.14224	0.010251	0	0.558567	0.551936	0.016721	0.565833	0.386828	0
TUCP_005431	XLOC_129274	0.962323	3.39428	3.40819	2.80677	3.48097	2.8705	2.43953	2.77762	2.99973	4.31355	3.0955	3.89005
TUCP_004561	XLOC_109865	0.668584	0.138836	3.00849	5.01975	0	0.352119	0	0.310604	0	3.65024	0.751687	0
TUCP_002724	XLOC_067115	0.411899	1.05649	0.682621	2.16636	0.585348	0.474592	0.633928	0.558211	0.775933	0.871696	0.901968	0.920794
TUCP_005450	XLOC_129932	0.921492	0.177376	0.082013	0.091577	0.163296	0.15169	0.043591	0.09211	0.111431	0.176964	0.198107	0.192444
TUCP_003196	XLOC_077521	0.041061	0.050021	0.242783	0.149127	0.127681	0.130213	0.200843	0.076508	0.127541	0.279914	0.087524	0.308967
TUCP_005027	XLOC_120184	0.411068	0.240733	0.171499	0.566752	0.217755	0.108709	0.221235	0.200634	0.511718	0.343371	0.488353	0.170584
TUCP_000297	XLOC_009337	0	0	0	0.000299	0	0.000957	2.47655	0.001645	0	0	0.001412	0.001479
TUCP_005810	XLOC_139701	0.277132	0.323607	0.301171	0.300612	0.230842	0.254631	0.310242	0.292489	0.226429	0.321051	0.261271	0.478434
TUCP_002188	XLOC_055603	1.67691	0.722339	1.20947	0.085817	0.675279	0.933471	0.677486	1.03042	1.36686	1.30135	1.51445	1.22252
TUCP_003420	XLOC_083993	4.23676	3.72295	0.758561	1.43381	3.24067	3.00303	3.20189	2.24508	4.02678	2.98643	4.93455	4.50203
TUCP_003438	XLOC_085114	0.019863	0.005394	0.032447	0.084687	0.00547	0.001637	0.025131	0.006184	0	0.094754	0.006953	0.224877
TUCP_000779	XLOC_020303	1.04499	0.896165	0.593204	0.874528	0.667459	0.227094	0.518308	0.479095	0.851562	0.96654	0.780649	0.896634
TUCP_001418	XLOC_036852	0.803258	0.893985	0.867999	0.752766	0.807454	0.608843	0.548558	0.890278	1.23558	1.12294	0.940348	1.13969
TUCP_001285	XLOC_031667	0	0.311132	0.167512	1.76507	0.137832	0.077868	0.167519	0	0.261646	0.169296	0.544115	0.334156
TUCP_005533	XLOC_131764	0.69883	0.702719	0.665721	0.721439	0.553461	0.431525	0.517697	0.451474	0.810486	0.939128	0.994573	0.733224
TUCP_001824	XLOC_047000	0.208704	0.13008	0.073752	0.096381	0.241122	0.20313	0.147078	0.062714	0.062477	0.290918	0.146444	0.511328
TUCP_000864	XLOC_021229	1.66715	1.8436	1.70747	1.72293	1.79483	1.26946	1.10085	1.3922	1.55819	2.18926	1.78372	2.273
TUCP_002286	XLOC_057427	0.914697	0.802446	0.909702	0.815307	0.635088	0.392957	0.606488	0.678397	0.932573	1.26821	1.29312	1.23986
TUCP_005253	XLOC_125613	0.433114	0.397582	0.043467	0.32467	0.014268	0.589589	0.387424	0.027218	0.586606	0.996359	0.516205	0.574491
TUCP_000100	XLOC_003308	0.339794	0	0	0	0	0.59991	0	0	0	0	0	0
TUCP_005667	XLOC_135288	0.956576	2.04831	1.84577	1.37533	1.4849	1.50045	1.62574	1.37564	2.09291	2.55018	2.33418	2.24356
TUCP_003501	XLOC_086906	0.160777	0.043613	0.173399	0.189415	0.090814	0.01706	0.116321	0.108821	0.109562	0.15048	0.059777	0.985302
TUCP_002297	XLOC_057716	0.319232	0.51138	0.625415	0.484011	0.472693	0.327714	0.378697	0.437075	0.627772	0.770599	0.536058	0.649228
TUCP_003047	XLOC_075061	0.083675	0.22407	0	0.026937	0.042479	0.013364	0.002841	0.028611	0.524551	0.009157	0.003819	0
TUCP_000231	XLOC_007085	0.013012	1.39498	0	0	0.019188	0	0.0008	1.59404	0	0	0.0908	1.46194
TUCP_003284	XLOC_079116	5.16389	3.57824	4.1399	3.88434	1.9242	2.63105	2.77677	1.00419	4.25198	4.07097	4.52931	3.98274
TUCP_003238	XLOC_078575	0	0	0	0.374981	0	0	0	0	0	0.298679	0	0
TUCP_004445	XLOC_106737	0	0.622361	0	0	0	0	0	0.131951	0.19042	0.331553	0	0
TUCP_001155	XLOC_028061	0.616061	0.396063	0.531588	0.601267	0.431396	0.43731	0.460629	0.451991	0.605596	0.781724	0.655576	0.799669
TUCP_003685	XLOC_091995	0	0	0.400676	0.954796	0	0	0.002362	0.002551	0.000317	0.003009	0.005161	0
TUCP_001041	XLOC_024233	0.002973	0	0.952183	0	0	0	0	0.165538	0.974558	0	1.08122	0.968794
TUCP_001378	XLOC_034773	0	0	0	0.191694	0	0	0.309916	0	0.087347	0	0	0
TUCP_001129	XLOC_026929	1.2235	1.48798	2.14519	2.0275	0.726573	1.25243	1.70331	1.81509	2.52306	3.70653	3.13445	2.30227
TUCP_000114	XLOC_003374	0.401099	0	1.02188	0	0.871908	0	0.769597	1.29165	0.816669	1.03391	0	1.14981
TUCP_001705	XLOC_045248	0.588367	0.616502	0.718581	0.505424	0.486406	0.565318	0.306096	0.505864	0.529606	0.590936	0.315602	0.756422
TUCP_005278	XLOC_126029	0.781969	1.28597	1.08566	1.48668	1.00519	1.02113	0.946123	1.13539	1.06029	1.24452	0.983838	1.02319
TUCP_003485	XLOC_086668	0.633721	0.336362	0.496181	0.273752	0.423064	0.431413	0.296544	0.411898	0.505998	0.780946	0.569039	0.465181
TUCP_000672	XLOC_018970	0.738417	1.10044	1.02373	1.35502	0.888518	0.837742	0.830058	0.956192	1.20842	1.3993	1.36801	0.648501
TUCP_003730	XLOC_092455	0.146016	1.01612	0.184981	1.26949	0.366502	0.344785	0.595087	0.399234	0.788892	0.573833	0.907977	0.755352
TUCP_001897	XLOC_049263	0.565384	0.002266	0.563763	0.891624	0	0.005518	0.002843	0	0.678114	0	0	0
TUCP_005708	XLOC_136404	0.393748	0.450494	0.361132	0.306623	0.372936	0.357251	0.566992	0.260656	0.497385	0.445275	0.495712	0.565525
TUCP_002360	XLOC_058785	0.125954	0.053512	0	0.165765	0.145051	0.14835	0.324588	0.177217	0.205099	0.507032	0.050681	0.09874
TUCP_000419	XLOC_013210	2.36657	1.97611	0.876289	2.33494	0.28315	1.12921	1.33783	1.77736	2.46214	1.79679	1.13281	1.54269
TUCP_002775	XLOC_067866	0	0.122518	0.070563	0.14814	0.091743	0.322976	0	0.233595	0.029029	0.102232	0	0.043273
TUCP_002879	XLOC_070060	0.55183	0.635035	0.630129	0.758727	0.430344	0.595961	0.539138	0.507006	0.641379	0.728937	0.577793	0.771843
TUCP_001866	XLOC_047558	0.618096	0.649596	0.414995	0.571324	0.125636	0.149522	0.231931	0.500292	0.281046	0.505797	0.319883	0.347746
TUCP_003108	XLOC_075890	0.591805	0	0	0	0	0	0	0.425828	0.314592	0	0	0.411412
TUCP_000912	XLOC_022673	0	0.046942	0.419534	0.428455	0.005573	0.140669	0.469454	0.164541	0.361036	0.586856	0.418629	0.733476
TUCP_001534	XLOC_040317	1.70349	0	0	0.867447	0	0	0	0	2.55381	0	0	0
TUCP_005530	XLOC_131606	0.717723	0	0.494438	0	0.425585	0	0	0.350336	0	0.395706	0.85875	0.448489
TUCP_005877	XLOC_141432	0.3272	0.366295	0.091189	0.476131	0.142168	0.148556	0.098287	0.178185	0.235897	0.329637	0.297076	0.409115
TUCP_001297	XLOC_032484	1.24345	1.78047	1.11354	1.96951	1.24066	2.34162	1.37611	1.29337	1.04223	1.2953	0	3.55429
TUCP_005679	XLOC_135870	0.187433	0.571865	0.485888	0.70028	0.518903	0.493759	0.297574	0.342128	0.402729	0.545131	0.405465	0.360948
TUCP_003985	XLOC_097908	0.212168	0.734413	0.775924	0.472761	0.593347	0.133832	0.355252	0.271434	0.380455	0.340145	0.411016	0.341906
TUCP_002788	XLOC_068340	0.724541	0.487786	0.671286	0.634591	0.695797	0.477025	0.378371	0.37415	0.605916	0.62513	0.038182	0.674845
TUCP_005215	XLOC_124249	1.09462	0.550867	0.593611	0.162192	0.564123	0.640299	0.172779	0.612392	0.312079	0.674849	0.263737	0.625154
TUCP_004724	XLOC_113456	1.06618	0.971989	0.544859	0.546714	0.725934	0.770643	1.36985	0.85977	0.838446	0.783066	0.792704	0.836331
TUCP_005513	XLOC_131344	0.011154	0.42688	0.692535	0.572799	0.010441	0.185968	0.328732	0.394734	0.354775	0.075383	0.617075	0.446593
TUCP_002863	XLOC_069962	0.347053	0.410428	0.138201	0.806556	0.114996	0.319494	0.172366	0.365319	0.320219	0.505889	0.49306	0.405028
TUCP_002593	XLOC_064897	0.210082	0.219206	0.465539	0.431825	0.121157	0.146122	0.093512	0.283007	0.589243	0.210935	0.233644	0.206402
TUCP_005010	XLOC_120090	1.38147	1.63654	1.48001	1.81314	0.894735	1.23158	0.92613	1.22654	1.3839	1.71058	1.33686	1.17422
TUCP_001375	XLOC_034770	0.300977	0.912982	0.738982	0.452182	0.564346	0.572948	0.715313	0.6125	0.231959	0.943106	0.970023	1.12526
TUCP_004952	XLOC_118331	19.1531	8.19678	10.5068	9.04471	7.51718	7.08552	6.80392	6.95354	11.8722	11.2146	10.6494	4.93578
TUCP_003379	XLOC_082727	0.19359	0.009582	0.44895	0.325213	0.274262	0.333069	0.122042	0.206758	0.309032	0.502328	0.27472	0.260323
TUCP_001525	XLOC_040234	0.240113	0.120851	1.11422	0.965951	1.17478	0.19915	0.754386	0.32944	0.287532	1.20672	0.219569	0.605456
TUCP_001480	XLOC_038876	0.471795	0.346164	0	0.435376	0.607536	0.409732	0.479731	0.523081	0.15	0.619285	0.561768	0.917338
TUCP_000254	XLOC_007970	0.727438	0	0.341977	0.277005	1.11131	0.367319	1.04183	0.14771	0.322945	1.9607	0	0
TUCP_000392	XLOC_012311	1.08006	1.60533	0.207821	2.96137	1.78645	0.747204	1.24276	1.15	2.59225	2.3832	3.1344	2.5345
TUCP_004299	XLOC_103521	1.90856	1.54325	1.34812	0.809024	2.57511	1.07117	1.3999	1.70207	2.0471	1.24481	2.91255	1.32281
TUCP_004539	XLOC_109165	0.234081	0.311578	0.017473	0.329725	0.532544	0.141188	0.413227	0.28156	0.691544	0.581848	0.216847	0.536306
TUCP_005044	XLOC_120452	1.00176	1.15527	1.15623	1.08514	1.06457	1.23202	1.08267	0.89177	1.74547	1.52854	1.66051	1.68913
TUCP_003815	XLOC_094915	0.017001	0.436074	0.608948	0	0.069592	0.008352	0.342925	0.061181	0.055231	0.040257	0.018717	0.066039
TUCP_002161	XLOC_055000	0.488316	0.303968	0.394958	0.177197	0.153238	0.558178	0.440369	0.343434	0.381225	0.342876	0.369882	0.414766
TUCP_005319	XLOC_126728	0.721559	0.314976	0.837295	0.61806	0.321287	0.540695	0.578891	0.551107	0.857515	0.662335	0.735837	0.829574
TUCP_004358	XLOC_104252	0.241204	0.40996	0.444203	0.498768	0.4137	0.23634	0.26349	0.457367	0.634876	0.416654	0.491478	0.494197
TUCP_001910	XLOC_049498	0.278866	0.002112	0	1.57275	0.358181	0.783746	0.081794	0.875574	0.581906	1.16522	0.627387	1.07959
TUCP_004788	XLOC_115295	0.431851	1.35019	1.42925	1.5253	1.10059	1.22386	1.08836	1.17839	1.44006	2.01692	1.63787	2.04065
TUCP_001853	XLOC_047275	0	0	0	0	0	0	0	0	0	0.731839	0	0
TUCP_002886	XLOC_070560	0	0.301643	0.076895	0.048266	0.016913	0.584285	0.18902	0	0.204104	0.0588	0.062811	0.17571
TUCP_003327	XLOC_081694	1.33588	0.036309	0.658834	3.43713	2.1295	1.27232	1.94289	1.95875	0.29009	1.89667	3.09886	0.763559
TUCP_001055	XLOC_024429	0.361987	0.426981	0.352656	0.258246	0.428867	0.193358	0.133667	0.385405	0.409691	0.377163	0.248287	0.471293
TUCP_000363	XLOC_012109	0.541503	0	0.271188	0	0.218008	0.39227	0.176458	0.132286	0.279122	0.31133	0.352416	0.405633
TUCP_003467	XLOC_086411	0.416914	0.176255	0.295191	0.204131	0.140111	0.136988	0	0.076696	0.135412	0.248709	0.233984	0.356876
TUCP_003481	XLOC_086620	0.30549	0.102225	0	0.460256	0.14502	0.162975	0.098317	0.245798	0.142778	0.314103	0.170569	0.212714
TUCP_001980	XLOC_050352	3.30393	2.96003	3.51185	3.32001	3.11388	2.69791	2.49572	2.98951	4.39873	4.71484	4.71128	4.05839
TUCP_000746	XLOC_019989	1.63918	0.598913	0.562394	0.775783	0.632704	0.587226	0.500197	0.455233	0.721351	0.961282	0.628893	0.706574
TUCP_004823	XLOC_116261	1.48141	1.41159	1.37373	1.38108	1.08391	0.924615	0.993679	1.11248	1.7174	1.67331	1.61229	1.53176
TUCP_002107	XLOC_053529	0.393124	0.433595	0.46447	0.451704	0.374332	0.558691	0.37228	0.359818	0.441694	0.450757	0.41932	0.502648
TUCP_001738	XLOC_046026	0.286521	0.360807	0.379704	0.500386	0.289192	0.232915	0.291358	0.277974	0.322192	0.612028	0.393313	0.524892
TUCP_004559	XLOC_109853	0.489948	0.550257	0.628186	0.365018	0.51828	0.623083	0.486242	0.367557	0.48581	0.563372	0.332812	0.626989
TUCP_001509	XLOC_039784	1.79253	1.99928	2.17052	1.53301	1.44929	1.52713	1.76365	1.5436	2.13823	1.94782	2.77343	2.11335
TUCP_000512	XLOC_015502	0.924146	0.93541	1.08509	1.30086	1.13365	1.03985	1.12815	1.00068	1.34464	1.48277	1.35722	1.44465
TUCP_002476	XLOC_061941	2.2733	0.756104	1.83572	0.887269	1.66474	1.33735	1.3047	1.37997	1.0189	1.55134	1.94206	1.70668
TUCP_005076	XLOC_121287	0.17156	0.61315	0.297328	0.481614	0.249815	0.238754	0.328298	0.342928	0.263233	0.403519	0.267701	0.063892
TUCP_001594	XLOC_041657	0.401074	0.429373	0.37824	0.602673	0.374538	0.336668	0.404198	0.315785	0.580668	0.690755	0.57208	0.621547
TUCP_000089	XLOC_002754	0.553471	0.569499	0.561104	0.755991	0.528249	0.321259	0.406897	0.459875	0.78041	0.858508	0.722918	0.704061
TUCP_002500	XLOC_062777	0.114199	0.488132	0.316552	0.448724	0.413151	0.437295	0.336455	0.435297	0.437957	0.381709	0.331289	0.948343
TUCP_001152	XLOC_027993	0.587436	0.622101	0.659764	0.686379	0.565309	0.468554	0.508442	0.359381	0.763593	0.818602	0.743143	0.75969
TUCP_004696	XLOC_112620	0.156732	0.336651	0.339515	0.246176	0.314934	0.172334	0.383756	0.043141	0.355186	0	0.563729	0.224274
TUCP_005046	XLOC_120496	4.64066	3.2634	4.84379	3.74069	3.20018	3.35148	2.58973	3.16248	5.19894	4.8828	5.83024	6.0295
TUCP_003506	XLOC_086924	0.056981	0.591685	0.473197	0.506128	0.190013	0.214111	0.445521	0.443218	0.690684	0.189749	0.64323	0.06485
TUCP_001038	XLOC_024164	2.35792	1.87471	1.7891	1.9013	1.86228	1.63514	1.59961	1.36074	2.1433	2.89926	2.36652	2.71393
TUCP_002238	XLOC_056488	0.013019	0	0	0	0	0.852422	0	0	0	0	0	0
TUCP_000503	XLOC_015269	0.472196	0.607201	0.302722	0.628531	0.417726	0.373117	0.367316	0.415683	0.650747	0.674685	0.581978	0.746836
TUCP_002369	XLOC_058848	1.47723	1.72644	1.47554	2.04414	1.30767	1.1796	1.08186	1.26201	1.91571	1.94594	1.68257	1.85694
TUCP_000515	XLOC_015552	0.147515	0.000629	0.565871	0.407861	0.003709	0.003095	0.012408	0.231792	0.004085	0.004306	0.006108	0.018555
TUCP_003375	XLOC_082437	0.381448	0.424319	0.308337	0.363002	0.311776	0.18428	0.20001	0.251598	0.209839	0.506067	0.446642	0.38266
TUCP_001842	XLOC_047202	0.807913	0.801918	0.721227	0.873364	0.6579	0.553847	0.523503	0.529361	0.912748	0.979177	0.88275	0.969464
TUCP_003101	XLOC_075498	0.188781	0.275443	0.180352	0.094435	0.146594	0.372374	0.18458	0.209208	0.156648	0.934457	0.409163	0.301386
TUCP_000626	XLOC_017366	0.610796	0.445208	0.371762	0.302319	0.31787	0.326164	0.388278	0.318296	0.367678	0.36178	0.438893	0.426163
TUCP_004716	XLOC_113255	0.141676	0	0.144014	0	0	0.171926	0	0	1.03367	0.297416	0	0
TUCP_001080	XLOC_024842	0.256603	0.522848	0.346554	0.330683	0.355261	0.104343	0.169066	0.315641	0.233375	0.350968	0.232182	0.201399
TUCP_001391	XLOC_035507	0	0.2627	0.169555	0	0	0.038832	0.478036	0	0	0	0.187298	0
TUCP_002428	XLOC_060087	0.841472	0.548637	0.335331	0.290848	0.793867	0.579543	0.307378	0.405304	0.610981	0.282924	0.527358	0.382528
TUCP_000715	XLOC_019490	0.456288	0.220815	0.435792	0.592518	0.227818	0.362093	0.460929	0.42725	0.485415	0.536287	0.625712	0.304545
TUCP_005432	XLOC_129314	4.5365	3.08012	3.66929	3.89242	2.90848	2.25972	2.65895	2.47539	2.93718	4.1466	3.99668	4.24105
TUCP_005409	XLOC_128933	0.400999	0.575585	0.287596	0.630159	0.204652	0.253218	0.218548	0.263966	0.39151	0.457146	0.502292	0.379815
TUCP_005177	XLOC_123744	1.02523	0.758182	0.880661	0.768556	0.676739	0.491294	0.512968	0.541746	1.15686	1.08972	1.02958	0.945258
TUCP_002362	XLOC_058794	0.51049	0.500121	0.583258	0.521366	0.529376	0.518734	0.450895	0.471398	0.647988	0.607711	0.547227	0.54635
TUCP_003867	XLOC_095677	1.04567	0	0	0	0	0	0	0	0	0	0	0.011028
TUCP_004973	XLOC_119148	3.62074	2.70429	4.08107	2.82344	2.25317	2.76629	1.36901	2.91571	3.32366	4.93439	4.75451	3.41606
TUCP_001483	XLOC_038910	0.093517	0.117503	0	0.996488	0	0.017893	0	0.084952	0.134206	0	0	0.052365
TUCP_000373	XLOC_012199	0.300399	0.823427	0.644681	0.740432	0.634862	0.347799	0.434813	0.295855	0.44143	0.852552	0	0.653483
TUCP_001583	XLOC_041490	0.018406	0	0.164656	0	2.2e-05	0	0.057732	0	0	1.85163	2.4e-05	0.063496
TUCP_003244	XLOC_078619	2.20614	0.717046	0.747308	0.773985	0.644105	0.925931	0.668754	0.624842	0.692987	0.753406	0.780834	0.705627
TUCP_005100	XLOC_122210	0	0.156224	0.106031	0.085663	0.146118	0.137234	0.11967	0.173281	0.174034	0.219978	0.81749	0.140981
TUCP_003568	XLOC_089800	0.464452	0.271137	0.311133	0.577017	0.317853	0.336064	0.242492	0.276169	0.601483	0.597786	0.618044	0.446384
TUCP_001721	XLOC_045668	0.554668	0	0	0	0	0	0	0	0	0	0	0
TUCP_004424	XLOC_106381	0.124995	0	0.250327	0.308272	0.103712	0.056059	0.272147	0.091239	0.12968	0.328628	0.369606	0.416371
TUCP_002383	XLOC_059197	0.466924	0.528161	0.395896	0.428208	0.320586	0.298777	0.220301	0.371445	0.482538	0.529724	0.54432	0.433249
TUCP_004209	XLOC_102356	0.144039	0.523839	0.229461	0.633573	0.423685	0.238557	0.491112	0.431481	0.330884	0.794222	0.443647	0.300244
TUCP_005773	XLOC_138207	0.695949	0.539854	0.855777	0.496911	0.621496	0.608245	0.869583	0.861927	1.69851	1.33933	1.10285	1.2185
TUCP_002955	XLOC_072393	0	0	0	0.05149	0	0	0	0	0	0	0	0
TUCP_001253	XLOC_030956	1.04101	0.83858	0.71191	0.690613	0.504249	0.628093	0.44868	0.401707	0.796049	0.87336	1.24288	0.916787
TUCP_004155	XLOC_101048	0.348701	0.174134	0.238698	0.069055	0.318445	0.147105	0.250219	0.069094	0.083651	0.249876	0.469918	0.17574
TUCP_001460	XLOC_038600	0	0.077341	0	0	0.189065	0.437872	0	0	0	0	0	0
TUCP_002001	XLOC_050638	0	0	0	0.695448	0	0	0	0	0	0	0	0
TUCP_004132	XLOC_100526	0.310341	0.428479	0.36975	0.453611	0.283895	0.290577	0.401463	0.327499	0.493285	0.440723	0.388625	0.516084
TUCP_000650	XLOC_018299	0.478417	0.192451	0.169209	0.106542	0.157215	0.101477	0.039182	0.12404	0.066021	0.103141	0.072476	0.127095
TUCP_004433	XLOC_106490	1.39671	1.35295	1.42646	1.43978	1.13428	0.913248	0.967116	0.994689	1.66415	1.81034	1.89757	1.61923
TUCP_003508	XLOC_086991	0	0	0	0	0	0	0.662663	0	0	0	0	0
TUCP_001162	XLOC_028222	0.497244	0.640848	0.330601	0.604952	0.291204	0.401966	0.351262	0.434813	0.665111	0.588476	0.501427	0.652129
TUCP_002777	XLOC_068052	0.435181	0.539028	0.772471	0.695401	0.404623	0.563909	0.519757	0.534397	0.680383	0.791905	0.803939	0.810248
TUCP_003585	XLOC_090225	0.195613	0	0.007426	0.012466	0	0.026114	0	0	0.000903	0.130765	0.177426	0.555557
TUCP_005188	XLOC_123786	0.892407	0.575603	0.262294	1.08179	0	0.322686	0.372826	0.281832	0.736698	0.317844	0.33619	0.669237
TUCP_002237	XLOC_056488	1.41223	1.02413	1.15879	1.28428	1.03903	0.186466	0.929335	0.977175	1.55518	1.53843	1.56241	1.66817
TUCP_005518	XLOC_131563	0.364669	0.262487	0.229988	0.401762	0.187157	0.176431	0.214109	0.268665	0.194179	0.605714	0.385593	0.496765
TUCP_001414	XLOC_036796	0.143428	0.312257	0.407981	0.382449	0.436275	0.227629	0.15182	0.528868	0.128131	0.398943	0.4971	0.112828
TUCP_000889	XLOC_021801	0.915507	0	0.349777	0.279342	0.501716	0.702902	0.597616	1.25343	1.17626	1.25254	1.10715	0.981946
TUCP_005185	XLOC_123778	0.476604	0.623207	0.619704	0.141467	0.428109	0.400564	0.347575	0.462759	0.475661	0.57163	0.57071	0.599436
TUCP_004899	XLOC_117273	2.66192	3.54001	2.36482	4.137	2.95184	2.55477	2.56042	2.94635	2.93621	2.90867	2.03572	3.90977
TUCP_002499	XLOC_062777	0.873554	3.74112	3.2443	3.79234	0	3.11532	2.82503	3.11007	3.57681	2.57343	0.621088	2.01
TUCP_005573	XLOC_132820	0.728029	0.937136	1.0776	0.858843	1.13769	0.753493	0.727062	0.778417	0.859281	0.973587	1.05723	1.04365
TUCP_000510	XLOC_015409	0	0	0	0.477187	0	0	0	0	0	0	0	0
TUCP_000679	XLOC_019064	0.805458	1.79548	1.65828	1.08732	1.16058	1.0702	0.838106	0.952824	1.84196	1.79191	1.67688	1.70003
TUCP_004291	XLOC_103467	0	0.974393	0.957904	0.553376	0.949697	0.787729	0.894278	0.890935	0.974601	1.4045	0.94162	1.24474
TUCP_001493	XLOC_039624	0.019268	0.553529	0.559699	0.527332	0.373983	0.664057	0.799765	0.465587	0.411324	0.557016	0.353862	0.538745
TUCP_005116	XLOC_122281	0.146742	0.160401	1.18048	0.618287	0.832359	0.371112	0.166633	0.614726	0.173334	0.233886	0.204335	0.294987
TUCP_004653	XLOC_112059	1.0999	0.717986	0.658906	0.830111	0.728092	0.473486	0.797166	0.659382	0.899608	0.900947	0.878482	0.921532
TUCP_003598	XLOC_090585	0.468215	0.187177	0.446815	0.343277	0.218808	0.13732	0.262458	0.277147	0.517642	0.529622	0.661834	0.502874
TUCP_003865	XLOC_095672	0.8173	1.3025	1.12049	0.896285	0.540276	0.646423	0	0.820778	0.494692	1.01627	0.856773	1.04866
TUCP_003281	XLOC_078956	0.137119	0.262499	0.411839	0.343385	0.430885	0.214703	0.324588	0.241823	0.338032	0.150623	0.221155	0.451811
TUCP_004183	XLOC_101545	0.89286	0.760634	0.757747	0.723866	0.426985	0.631637	0.5185	0.55379	0.671276	0.786531	0.624142	0.723379
TUCP_000661	XLOC_018670	0	0	0.015103	0	0	0	0.811577	0	0	0	0	0
TUCP_001501	XLOC_039664	0.122656	0	0	0	0	0	0	0	0	0	0	0.077436
TUCP_002478	XLOC_062141	0	0.147814	0.372787	0	0	0	0.032626	0.121558	0	0.140991	0.107886	0.036659
TUCP_004480	XLOC_107436	0	0	0	0	0	0	0	0	0.860785	0.365031	0.97973	0.696894
TUCP_002465	XLOC_061536	1.17812	0.473622	0.68331	0.60536	0.703427	0.358582	0.645894	0.446643	0.785727	1.02675	0.840151	0.669808
TUCP_005069	XLOC_120996	0.234377	0	0.080216	0	0.190666	0	0	0.316463	0	0	0	0.437215
TUCP_001654	XLOC_043430	0	4.95268	0	0.559186	0	0	0	0.008173	0.193568	1.91539	0.116159	0
TUCP_002749	XLOC_067415	0.254936	0.225796	0.272806	0.297287	0.215517	0.169693	0.180849	0.170081	0.457276	0.510023	0.428725	0.43695
TUCP_003930	XLOC_096647	0.474703	0.614569	0.670932	1.03097	0.557497	0.428985	0.376346	0.596411	0.758114	0.714456	0.73746	0.785393
TUCP_002642	XLOC_065641	0.446269	0.803724	0.555268	0.840023	0.576386	0.414012	0.34235	0.417565	0.522381	0.70361	0.368625	0.562206
TUCP_002710	XLOC_066952	0.34033	0.344196	1.06448	0.21623	0.483357	0.240118	0.625573	0.258218	0.789788	0.873033	0.754422	1.29701
TUCP_001864	XLOC_047550	0.55069	0.688189	0.420722	0.221373	0.73966	0.735983	0.576804	0.18631	0.348422	0.601771	0.329074	0.413717
TUCP_004917	XLOC_117804	1.06246	1.17464	0.461586	2.55948	0.816598	0.736143	1.05964	1.11638	1.47392	0.924159	1.00181	0.789085
TUCP_003335	XLOC_081781	0.585953	0.618476	0.337555	0.658871	0.678646	0.378397	0.478014	0.500206	0.620109	0.580684	0.580755	0.777253
TUCP_000957	XLOC_023389	0.140504	0	0.205025	0.014149	0.237408	0	0.480179	0.021339	0.269895	0.260646	1.57102	0.003057
TUCP_003363	XLOC_082102	0	0	0	0	0	0	0.562527	0.25573	0	0	0	0
TUCP_001856	XLOC_047327	0.193275	0.142856	0.124002	0.247927	0.133923	0.302907	0.165689	0.375609	0.437159	0.295742	0.348998	0.36366
TUCP_000867	XLOC_021273	0.910936	0.038929	0.845963	1.04144	0.31576	0.887228	0.12743	0.026909	0.001136	2.23813	0.21468	0.846201
TUCP_000263	XLOC_008154	0.242461	0.256468	0.24864	0.14615	0.241045	0.129052	0.281548	0.029866	0.182606	0.458758	0.236032	0.356332
TUCP_001710	XLOC_045346	0	0.17337	0.130003	0.161674	0	0	0	0	1.12886	0.260926	0	0
TUCP_004405	XLOC_105591	0.189397	1.01407	0	0	0.375935	0.392095	0.210078	0.346985	0.382492	0.597178	0.442824	0.307849
TUCP_001978	XLOC_050319	0.357206	0.52353	0.339427	0.518548	0.485674	0.280762	0.317306	0.402852	0.294775	0.148801	0.143877	0.25823
TUCP_003710	XLOC_092263	0.156805	0.231935	0	0.207006	0.424241	0	0	0.31314	0.192915	0.258254	0.231003	0.28364
TUCP_001944	XLOC_049831	0.917942	0.757448	0.57957	1.17922	0.853253	0.629241	0.634683	0.850171	1.01252	0.903531	0.715181	0.716268
TUCP_002307	XLOC_057947	0.194877	0.538021	0.605141	0.620789	0.510826	0.596856	0.493003	0.480589	1.20627	0.665162	0.432357	0.530737
TUCP_001477	XLOC_038876	0.154989	0.052928	0.276201	0.393318	0.079513	0.099439	0.094956	0.104219	0.335535	0.04649	0.145083	0.235982
TUCP_005809	XLOC_139694	0.742808	0.414151	0.666789	0.24039	0.484448	0.255354	0.259199	0.291743	0.187386	0.360733	0.203263	0.29342
TUCP_000171	XLOC_004745	0	0	0	0	0	0	0	0	1.12345	0	0	0
TUCP_003823	XLOC_095018	0.342757	0.478421	0.509865	0.445085	0.253754	0.391095	0.383744	0.390784	0.545347	0.526923	0.308342	0.539326
TUCP_000374	XLOC_012199	0.219646	0.029373	0	0.012529	0	0	0	0	0.298467	0	0.828558	0
TUCP_002288	XLOC_057478	1.63111	1.25077	1.3903	1.07798	1.28322	1.28381	1.11151	1.07034	1.54548	2.17916	2.08324	1.77093
TUCP_004678	XLOC_112401	1.24551	3.37592	2.93369	7.21567	2.79104	2.37524	2.55569	2.82326	3.38768	4.13636	3.24034	3.09941
TUCP_000590	XLOC_017007	4.12591	2.93423	2.99964	2.65482	1.76775	2.98052	2.53792	3.42908	4.91447	4.31796	3.40979	4.05011
TUCP_005726	XLOC_137051	0.552445	0.258873	0.371533	0.547936	0.446035	0.138386	0.627028	0.303945	0.630512	0.674494	0.315775	0.420098
TUCP_002927	XLOC_071674	2.62656	2.98005	2.24991	2.30173	2.50632	2.21769	2.04338	1.10951	3.33175	3.68844	3.25321	3.20253
TUCP_005785	XLOC_138723	0.808172	1.07186	0.286048	1.4114	0.215306	0.170612	0.928116	0.100434	0.360315	0.532111	0.281442	0.139566
TUCP_000176	XLOC_005024	0	0	0	0	0	0	0	0.047892	0.279186	0	0	0.095112
TUCP_001448	XLOC_037874	1.15331	6.74322	7.20486	8.45827	6.11793	4.89396	5.22885	4.80942	8.20501	9.75289	8.78328	7.97372
TUCP_005385	XLOC_128664	0.845744	0.524189	0.730514	0.396226	0.561293	0.704494	0.524342	0.491438	0.669247	0.872091	0.773697	0.785724
TUCP_005341	XLOC_127240	0.851825	0.163483	0.595138	0.542399	0.405501	0.558153	0.356187	0.091175	0.208982	0.603788	0.254873	0.845319
TUCP_005621	XLOC_134326	0.267763	0.508561	0.688611	1.18355	0.54219	0.185393	0.615701	0.254622	0.42512	1.08099	0.782051	0.970431
TUCP_002143	XLOC_054562	0.164555	0.398034	0.330813	0.375847	0.10047	0.159266	0.298269	0.205885	0.266795	0.46071	0.41696	0.393006
TUCP_001859	XLOC_047396	0.380711	0.589765	0.833131	0.765533	0.673853	0.483004	0.329425	0.451973	0.548022	0.737651	0.692002	0.57768
TUCP_003333	XLOC_081749	1.26061	1.04039	0.94115	0.998251	0.787993	0.684255	0.664427	0.617551	0.906062	1.0938	1.23343	1.36837
TUCP_003893	XLOC_096026	0.7143	0.613131	0.921032	0.542227	0.69889	0.528985	0.410043	0.291183	0.732992	0.501972	0.853204	0.600955
TUCP_002731	XLOC_067217	0	0.064424	0	0.084972	0	0.065377	0.083193	0.06046	0.20326	0.041096	0.140549	0.487642
TUCP_000022	XLOC_000643	0.435156	1.01476	1.93282	1.54183	0.607569	0.769339	0.489586	1.17783	0.773563	0.642108	0.591844	0.899147
TUCP_000808	XLOC_020490	8.24028	8.58605	10.6866	10.8408	7.88364	6.63825	7.11379	7.18083	11.4371	14.0351	13.4113	12.1968
TUCP_005112	XLOC_122272	0.290847	0.813768	0.659824	1.25873	0.545911	0.423268	0.520957	0.622735	0.940777	0.820284	0.780474	0.771872
TUCP_003358	XLOC_082010	0	0	0	0	0	1.36304	0	0	0	0	0	0
TUCP_003511	XLOC_087057	0.302081	0.900571	0.801165	0.895078	0.961837	0.611818	0.241516	0.763396	1.04043	1.13478	0.287172	0.282451
TUCP_004636	XLOC_111900	0.957453	1.65083	1.05544	1.27385	1.02397	0.814754	1.06947	0.854906	1.4728	1.24075	1.22568	1.17456
TUCP_003946	XLOC_096911	1.55757	1.87895	1.52753	1.07533	0.899465	1.17434	1.13013	1.03634	1.5608	1.96699	2.39877	1.89387
TUCP_001473	XLOC_038849	2.46581	3.57116	3.37691	1.41524	0.684502	4.19261	3.03597	3.54154	3.93462	1.78304	1.11684	4.14995
TUCP_005891	XLOC_141609	1.96081	0.827998	2.01135	0.417721	1.60457	1.17296	0.669068	1.14194	2.45948	2.39002	1.66132	2.34503
TUCP_004314	XLOC_103771	0	0	0.390295	0	0	0	0	0	0	0	0	0
TUCP_003317	XLOC_081071	0	0.121987	0.058388	0.133336	0.057713	0.848101	0.075384	0	0.145391	0.145612	0.196445	0.660598
TUCP_004016	XLOC_098702	0.839773	0.528556	0.46435	0.225095	0.333208	0.413442	0.253832	0.377247	0.372579	0.64249	0.6245	0.813572
TUCP_003198	XLOC_077566	0.709932	0	0.416974	0	0	0.282338	0	0	0.139802	0	0	0.195699
TUCP_004978	XLOC_119206	2.59618	4.12622	2.71702	0	2.40167	2.28737	2.08006	0	2.62778	2.66839	2.39995	2.57017
TUCP_004784	XLOC_115243	2.88146	1.86336	2.02462	2.26281	1.7926	1.66536	0.033613	0.792735	1.44253	1.85608	2.25575	2.70037
TUCP_002274	XLOC_057182	0.347966	0.386973	0.13995	0.254843	0.244673	0.113088	0.162854	0.162699	0.25022	0.097645	0.221665	0.097148
TUCP_003784	XLOC_093888	0.329243	0.307955	0.286002	0.495364	0.231482	0.187959	0.256937	0.27381	0.375591	0.470146	0.327083	0.353511
TUCP_000212	XLOC_006843	0.598171	1.54806	1.6906	1.14468	1.13958	1.17549	1.1875	1.14527	2.21417	2.40491	2.12588	1.58336
TUCP_005442	XLOC_129591	0	0.099685	0.023042	0.086982	0.039722	0.099849	0.517387	0.099662	0.151198	0.055321	0.081843	0.26037
TUCP_002843	XLOC_069692	0.905378	0.465983	1.17686	1.26929	0.948707	0.756711	0.892673	0.968321	1.16134	1.42738	1.25021	1.3588
TUCP_005029	XLOC_120214	0.122317	0.089175	0.185867	0	0.163549	0.068104	0.149011	0.138443	0.031385	0.036682	0.29444	0.054834
TUCP_003578	XLOC_090007	0.459756	0.396042	0.34264	0.557023	0.38098	0.325258	0.294265	0.343445	0.311093	0.367911	0.32864	0.438758
TUCP_004507	XLOC_108315	0.41694	0.131741	0.310446	0.179007	0.178949	0	0.155555	0.16162	0.192463	0.307071	0.524768	0.412141
TUCP_002995	XLOC_073724	0.47718	0.106909	0.132602	0.142548	0	0	0.08859	0.035832	0.04893	0.130994	0.136693	0.043466
TUCP_001243	XLOC_030870	0.183139	0	0.4604	0.40594	0	0.295827	0	0.004238	0.529832	0.468116	0.466434	0.488215
TUCP_001105	XLOC_025166	0.261889	0.407389	0.293974	0.258849	0.296915	0.252326	0.206111	0.224112	0.371732	0.291176	0.095223	0.27304
TUCP_000611	XLOC_017242	0.679787	1.91405	1.26412	1.78726	1.54044	1.00967	0.964423	1.07356	1.50625	1.6454	1.28809	1.57921
TUCP_000414	XLOC_013056	0.158674	0.042933	0.140054	0.149862	0.049118	0.100343	0.086171	0.086261	0.081448	0.011549	0.759284	0.173871
TUCP_002493	XLOC_062539	0.094294	0.551389	0.752158	0	0.541155	0	0	0.492177	0.279195	0	0.866934	0
TUCP_004450	XLOC_106851	1.39007	1.27889	1.23791	1.29879	1.02839	0.885984	0.900299	1.10599	1.53873	1.46844	1.48243	1.68715
TUCP_000364	XLOC_012109	0.821643	0.808839	0.366118	0.596808	0.556603	0.163754	0.319649	0.377827	0.345045	0.485937	0.368857	0.45276
TUCP_001197	XLOC_029387	0.737629	0.677222	0.564167	1.73137	0.574019	0.416957	0.459276	0.648134	0.343694	1.36236	0.657958	0.610154
TUCP_000247	XLOC_007308	0.800768	0.841529	1.00123	0.57315	0.853055	0.564653	0.687108	0.485093	0.863066	0.732588	0.854465	1.08613
TUCP_003099	XLOC_075498	0.716454	1.17714	0.654699	1.26896	0.712084	0.389327	0.652233	0.657228	1.01422	0.426826	0.538704	0.899494
TUCP_003314	XLOC_080950	0.140395	0.621407	0.773528	0.856669	0.43761	0.469168	0.308718	0.411854	0.395852	1.1286	0.528805	0.799423
TUCP_002862	XLOC_069961	2.87787	2.62361	3.1501	2.45856	2.51858	1.85583	2.31709	2.2495	3.18704	3.57573	3.41425	3.45768
TUCP_001817	XLOC_046981	0.359531	0.33972	0.317384	0.47146	0.266617	0.290145	0.251328	0.211612	0.395338	0.395871	0.368088	0.713029
TUCP_005416	XLOC_129064	0.332077	0.337805	0.285778	0.22779	0.393071	0.245618	0.216009	0.190455	0.293746	0.522742	0.40723	0.300619
TUCP_005217	XLOC_124259	0.671329	0.77712	0.755901	0.807423	0.699856	0.561497	0.588933	0.695964	0.895119	1.05842	1.37213	1.11703
TUCP_005035	XLOC_120255	1.32098	1.02191	1.00274	0.825409	0.87301	0.827966	0.857816	0.890649	1.38187	1.67735	1.07474	1.42896
TUCP_005534	XLOC_131773	0.24498	0.702911	0.577728	0.604985	0.861942	0.557559	0.762756	0.536356	0.507774	0.503937	0.520299	0.746815
TUCP_003324	XLOC_081522	0	0.173796	0.154317	0.612458	0.253351	0	0.209457	0.193631	0.446048	0	0.653604	0.293408
TUCP_004452	XLOC_106871	2.58943	1.38405	0.878637	0.758314	1.697	0.989929	0.822305	0.763818	1.34143	1.33753	1.70514	2.23857
TUCP_004129	XLOC_100523	0.096247	0.306694	0.141259	0.04039	0.328411	0.089219	0.629376	0.054215	0.194252	0.118966	0.203299	0.199063
TUCP_004762	XLOC_114818	0.523871	0.615484	0.553413	0.622416	0.429538	0.523865	0.454314	0.492965	0.564064	0.685579	0.827855	0.836879
TUCP_004947	XLOC_118146	1.1814	1.0689	0.725048	0.837201	0.7743	0.728139	0.873985	0.983328	0.616148	0.688356	0.803887	0.933296
TUCP_003500	XLOC_086906	1.93711	1.87709	2.38433	1.91355	1.98893	1.56696	1.50487	1.56617	2.48545	2.83992	3.41867	2.18515
TUCP_002651	XLOC_065872	0.246815	0.525723	0.503598	0.707582	0.4268	0.347224	0.389048	0.435884	0.583417	0.684743	0.501463	0.633504
TUCP_004257	XLOC_103051	0.286942	0.282979	0	0	0	0	0.338305	0	0.526636	0.348481	0.191895	0.074638
TUCP_002639	XLOC_065636	0.775204	0.710304	0.592415	0.635078	0.672074	0.559679	0.614694	0.693375	0.605329	0.668727	0.474617	0.523992
TUCP_000448	XLOC_013859	1.14184	0.483754	0.45029	0.463385	0.287039	0.528939	0.492883	0.455789	0.625919	0.602468	0.399756	0.446618
TUCP_005321	XLOC_126745	0.664226	0.51828	0.221657	0.680025	0.458271	0.246485	0.381862	0.260715	0.484704	0.595291	0.595359	0.662413
TUCP_002825	XLOC_069058	2.27596	1.4469	1.77303	1.2579	1.55643	1.63826	1.36538	1.071	1.85932	2.27738	2.53986	1.8423
TUCP_001107	XLOC_025198	0.778824	0.662153	0.329821	0.421179	0.186549	0.4229	0.509064	0.215443	0.589831	0.999057	0.284356	0.826666
TUCP_004942	XLOC_118026	2.59363	0.187606	0.290123	0.344127	0.165654	0.255401	0.241809	0.261693	0.552966	0.299566	0.496831	0.415492
TUCP_003656	XLOC_091717	2.07666	1.36506	1.55757	0.898618	0.959663	1.70542	2.21695	1.55664	0.246822	1.8265	2.66654	1.69448
TUCP_004797	XLOC_115745	0.373764	1.16589	0.539897	0.934072	0.544176	0.525819	0.584979	0.508305	0.643204	0.656112	0.51766	0.59883
TUCP_002202	XLOC_055901	0.222053	0.223705	0.312534	0.209399	0.240747	0.152634	0.315981	0.080931	0.245954	0.343508	0.194261	0.578514
TUCP_000669	XLOC_018940	2.51011	2.23731	2.91778	3.54825	2.54649	2.04696	2.11019	2.37649	3.35265	3.94452	3.62021	3.41076
TUCP_000287	XLOC_008651	0	0	0.015115	0.085082	0.02364	0	0	0	0	0.015981	0.016148	0
TUCP_003673	XLOC_091822	3.64879	2.18068	2.46734	2.50901	2.43488	2.63397	3.76862	3.44953	4.26185	4.58194	5.78389	4.44083
TUCP_003285	XLOC_079142	0.024874	0.40788	0.368629	0.648452	0.222571	0.312309	0.273809	0.284042	0.409597	0.532173	0.376929	0.524928
TUCP_002236	XLOC_056486	2.0881	2.11626	2.01369	2.88596	1.72284	1.53107	1.20302	1.67304	2.59486	2.11716	1.93887	2.41744
TUCP_000934	XLOC_022973	1.85501	0.375701	1.57951	0.423862	0.490894	0.469529	0.764307	0.72589	1.27347	1.6554	2.12283	1.38508
TUCP_001482	XLOC_038910	0.281044	0.239271	0.401729	0.309109	0.229913	0.257184	0.240763	0.240643	0.371814	0.457227	0.359164	0.273813
TUCP_002638	XLOC_065630	0.639787	0.489633	1.70318	0.741524	1.00547	1.00418	0.64828	1.1967	1.58539	1.79777	0.821917	0.878373
TUCP_000166	XLOC_004578	0.626331	0.781634	0.596929	0.853258	0.73953	0.563082	0.593141	0.60799	0.775757	1.00651	0.890756	0.901572
TUCP_003422	XLOC_084110	0.836001	0.46929	0.651306	0.333252	0.689908	0.344469	0.269225	0.202699	0.191489	0.777669	0.421715	1.64469
TUCP_003318	XLOC_081281	1.31144	1.10052	1.50836	1.25805	1.09928	1.07946	1.03216	0.956121	1.49288	1.70876	1.73524	1.58715
TUCP_000685	XLOC_019092	0.07549	0.060529	0.931901	0.259689	0.443099	0.317357	0.731752	0.672414	0	0.216725	0.20877	0.678878
TUCP_002495	XLOC_062649	0.326083	0.517609	0.301131	0.375239	0.398002	0.379149	0.275398	0.247825	0.467588	0.609525	0.396619	0.536442
TUCP_000174	XLOC_005010	0.200424	0.154066	0.35705	0.388968	0.652996	0.181702	0.354245	0.413682	0.41482	2.05384	0.599526	0.581452
TUCP_002041	XLOC_051530	0.084316	0.522186	0.408637	0.512852	0.289073	0.262786	0.179574	0.384255	0.393396	0.416566	0.521314	0.756983
TUCP_002646	XLOC_065708	0.759506	0.75418	1.16543	1.6234	0.979885	0.601377	0.794088	0.564376	1.24436	1.2204	1.31899	0.996245
TUCP_004057	XLOC_099752	0.548656	0.380436	0.258477	0.552784	0.280353	0.348125	0.278665	0.152856	0.230486	0.308961	0.358724	0.151416
TUCP_005002	XLOC_119874	0.366585	0.430384	0.280574	0.423568	0.418288	0.38756	0.250549	0.502134	0.637878	0.62468	0.85182	0.588413
TUCP_004420	XLOC_106238	1.02868	0.99527	0.766755	0.994564	0.620008	0.633014	0.67038	0.709118	0.937976	1.03074	0.874057	0.992311
TUCP_002763	XLOC_067797	0.170724	0.065501	0.268976	0.433	0.272151	0.051342	0.801779	0.198236	0.282038	0.523032	0.147028	1.14862
TUCP_000810	XLOC_020563	0.406459	0.366798	0.379697	0.342828	0.264594	0.255268	0.43033	0.433154	0.385617	0.434314	0.663962	0.274918
TUCP_000380	XLOC_012274	0.340102	0.63638	0.591872	0.715377	0.459142	0.505301	0.394911	0.471001	0.568561	0.735887	0.492587	0.541283
TUCP_005412	XLOC_128952	0	0.456614	0.657594	0.306583	0.00871	0.705629	0.007215	0	0.004732	0	0.789769	0.47119
TUCP_002213	XLOC_056073	1.0836	0.530991	0.990512	1.0853	0.970768	0.66589	0.263388	0.624869	0.762642	0.817096	1.20347	0.725013
TUCP_004726	XLOC_113577	20.9037	17.4311	17.7398	15.6216	15.2288	12.4513	11.3239	12.5579	21.4001	23.4599	22.1446	21.3322
TUCP_002717	XLOC_067029	0.348415	0.388187	0.201964	0.393312	0.396766	0	0.165975	0	0.30629	0.448469	0.727441	0.296797
TUCP_001761	XLOC_046475	1.8401	0	0.958432	0	0.00235	0.967346	0.848842	0.648142	0.471236	1.51307	0.665509	1.3869
TUCP_002347	XLOC_058450	0.358799	0.508121	0.695891	0.418827	0.669037	0.714418	0.291545	0.505695	0.574362	0.754187	0.794907	0.629363
TUCP_003807	XLOC_094904	0	0.105243	0	0.549946	0.085909	0	0.46633	0	0	0.198905	0.247631	0
TUCP_003816	XLOC_094915	0.882279	0.574014	0.018151	0.545559	0.363075	0.532117	0.079403	0.484185	0.659372	0.727033	0.536544	0.942905
TUCP_002013	XLOC_050928	0.860259	4.79099	4.82123	6.42708	4.48731	3.45986	3.58989	3.85826	4.02071	7.58902	5.97828	5.37727
TUCP_001167	XLOC_028428	3.24994	2.4372	1.9003	2.14185	1.88366	1.70584	2.26737	1.74655	2.57994	2.83126	3.33217	3.12539
TUCP_004217	XLOC_102438	1.61464	1.42997	1.21664	1.81694	1.0425	0.962493	1.09882	1.07769	1.63185	1.85463	1.57239	1.72915
TUCP_003677	XLOC_091915	0.150818	0.944043	0.222708	0.269188	0.557363	0.247179	0.848014	0.303032	0.046183	0.220257	0.19376	0.138352
TUCP_000840	XLOC_020985	0.298641	0.396379	0.056081	0.076225	0.359715	0.425882	0	0.462043	0.130126	0.048379	0.073438	0.374072
TUCP_003120	XLOC_075894	0.206124	1.19595	1.11893	0.13026	0.479205	0.767273	0.832935	0.134402	1.74212	0.14801	0.275036	0.57722
TUCP_004027	XLOC_099297	0.487144	0.367154	0.293302	0.458149	0.324053	0.270608	0.262192	0.22744	0.381167	0.336018	0.489768	0.568783
TUCP_002279	XLOC_057280	0	0.294771	0.673961	0.232296	0.161168	0.265116	0.156278	0.130966	0.363694	0.357014	0.340421	0.000106
TUCP_000482	XLOC_015077	0.279007	0.534627	0.072256	0.707546	0.047905	0.26488	0.054085	0.006949	0.153533	0.329447	0.209629	0.360824
TUCP_002025	XLOC_051281	0.193823	0	0.121015	0	0.192308	0.055441	0	0	0.320331	0	0.08065	0.052873
TUCP_000377	XLOC_012242	0	0.131445	0.132602	0	0.114143	0.182202	0	0	0.111955	0.650738	0.211569	0
TUCP_005324	XLOC_126843	0.819004	0.092602	0.124556	0	0	0.083101	0.267015	0.025771	0.130051	0.061557	0.26243	0.121466
TUCP_004969	XLOC_119046	0.533668	0.496066	0.479002	0.469325	0.702064	0.253845	0.397417	0.314156	0.43767	0.361271	0.484355	0.739277
TUCP_004309	XLOC_103663	0.73051	1.08367	0.972291	1.05262	0.689936	0.64813	0.466238	0.564302	1.08834	1.22077	1.05591	1.23466
TUCP_001949	XLOC_049904	2.77371	0.049437	1.49958	2.94477	2.14461	1.98333	0	1.24898	0	0.063104	0	2.69772
TUCP_003958	XLOC_097109	0.34585	0.539239	0.571807	0.68894	0.301056	0.403136	0.251578	0.330371	0.600917	0.727028	0.736548	0.615818
TUCP_004478	XLOC_107421	0.459532	0.183602	0.388625	0.432124	0.084666	0.03634	0	0.012804	0.042178	0.078412	0.086821	0.688781
TUCP_000819	XLOC_020792	0.897805	0.772348	0.624967	0.496002	0.829311	0.850458	0.718711	0.792974	1.24785	1.17191	1.06898	0.767
TUCP_001877	XLOC_048020	2.75438	2.32294	2.10105	2.02064	2.43259	1.86067	0.991645	1.88015	1.12995	2.53942	2.91833	2.47961
TUCP_003483	XLOC_086640	1.86359	0.8506	1.4552	1.05296	1.31127	0.857665	1.32203	1.48	2.00208	2.69064	3.98066	1.96059
TUCP_003178	XLOC_077277	0	0.027183	0.009437	0.051165	0.01043	0	0	0	0	0.557054	0.044167	0.044878
TUCP_004728	XLOC_113622	1.64736	0.976537	0.908099	0.622262	0.846587	0.442587	0.790345	0.589803	0.666745	0.485532	0.78744	0.954478
TUCP_003446	XLOC_085542	0.002329	0.549528	0.474866	0.528353	0.371951	0.441697	0.355683	0.348303	0	0.506221	0.2432	0.270666
TUCP_003776	XLOC_093643	0.734509	0.803231	0.603231	0.623666	0.562061	0.633276	0.520084	0.562913	0.668618	0.680087	0.567599	0.536664
TUCP_004766	XLOC_114875	0.799093	0.992879	0.536882	0.302703	0.528231	0.688094	0.740008	0.454437	1.01859	1.06083	0.623674	0.994987
TUCP_004384	XLOC_105227	1.10884	0.912681	0.974015	0.824963	1.05991	0.783791	0.887994	1.05274	1.15619	1.28281	0.935003	1.23129
TUCP_003161	XLOC_076698	0.379233	0.492677	0.555326	0.562463	0.447629	0.226538	0.191525	0.347797	0.646086	0.547321	0.662677	0.51698
TUCP_005013	XLOC_120101	0.907492	0.951595	0.521883	0.633672	0.704639	0.891615	0.628043	1.02179	1.06864	1.00974	0.900983	1.12774
TUCP_000641	XLOC_018085	2.0624	1.23661	1.71734	1.27458	1.37726	1.30935	1.12222	1.07576	2.23435	2.41155	2.04714	2.17465
TUCP_001504	XLOC_039670	1.06015	0.994807	0.973427	1.11693	0.365896	0.740795	0.638467	0.648409	0.829887	0.709428	0.656707	0.868806
TUCP_000403	XLOC_012429	0.179224	0.415297	0.414778	0.558628	0.322579	0.360074	0.302878	0.315398	0.414135	0.574458	0.381172	0.554951
TUCP_004979	XLOC_119206	1.7633	1.52136	1.60106	3.95404	1.35249	1.17454	0.655649	2.54116	1.99439	1.94589	1.50712	1.672
TUCP_001774	XLOC_046558	1.55666	1.9377	1.17698	1.20418	1.61882	0	1.64931	1.40354	2.08997	2.52708	1.80078	1.42596
TUCP_001465	XLOC_038786	0.424497	0.286764	0.646138	0.270033	0.345736	0.275494	0.261473	0.884143	0.32823	0.356486	0.22086	0.439502
TUCP_000123	XLOC_003792	0.036871	0.069515	0.088428	0.08358	0.021274	1.0013	0.034801	0.407714	0.423107	0.018185	0.770341	0.431105
TUCP_004552	XLOC_109541	0.128202	0	0.123786	0.018467	0.03296	0.089309	0.109897	0.040055	0.031035	0.363329	0.075665	0.086032
TUCP_004447	XLOC_106744	0.007284	1.12512	1.10958	2.15424	0.996452	0.632459	1.01394	0.953932	1.57672	2.10942	1.48175	1.47904
TUCP_002631	XLOC_065529	1.0631	1.28796	0.973991	1.08003	0.922584	0.829841	0.806802	0.531715	1.6623	1.5506	1.60932	1.33931
TUCP_000996	XLOC_023798	0	0	0	0	0	0	0	0.645967	0	0	0	0
TUCP_002151	XLOC_054802	1.83377	1.57175	0.978229	0	0.171944	1.72171	0.966982	0.749951	0.344597	0	0.234236	0.46236
TUCP_000719	XLOC_019555	0	0	0	0	0	0	0	0	0	0	0.585184	0
TUCP_000735	XLOC_019852	4.88786	4.15866	3.00147	4.63558	3.76869	2.6801	2.17546	2.8772	4.03932	3.9834	3.8287	3.90894
TUCP_000914	XLOC_022704	1.11815	0.03143	1.38674	0.291206	0	0	0	1.16124	0.722518	0.622662	1.0838	0
TUCP_005053	XLOC_120820	0.249746	0.854287	0.800934	1.13499	0.650608	0.709594	0.557544	0.662338	0.901155	1.1738	0.511909	0.796117
TUCP_000082	XLOC_002438	4.76188	1.4342	7.3625	2.46645	4.95335	1.06241	1.54211	2.47834	2.04059	1.15652	6.69595	0.908331
TUCP_003203	XLOC_077685	0.976015	2.2509	0.615712	1.83285	0.523761	0.900497	1.1417	1.4432	2.15083	2.59108	0.555892	2.02995
TUCP_000466	XLOC_014755	0.300362	0.378577	0.19155	0.269581	0.207076	0.230218	0.222966	0.165912	0.481871	0.514104	0.263833	0.521358
TUCP_003989	XLOC_097928	0.2088	0.32532	0.165227	0.218716	0.239135	0.168568	0.353532	0	0.501879	0.211833	0.249968	0.130987
TUCP_004839	XLOC_116392	1.42502	1.3362	1.3472	0.91956	1.15241	0.905552	0.694007	0.882476	1.47546	1.46568	1.19556	1.1092
TUCP_004493	XLOC_107870	0.896829	0.5349	0.821292	0.609752	0.441638	0.425141	0.414385	0.480119	0.627928	0.86971	0.77266	0.705122
TUCP_001600	XLOC_042053	0	0	0	0.114906	0.063325	0.308501	0	0	0.284341	0	0.109875	0
TUCP_002471	XLOC_061725	0	0	0	0	1.65777	0	0.416524	0	0	0	0	0.283582
TUCP_004769	XLOC_114899	0	0	0	0	0	0	1.25864	0	0	0	0	0
TUCP_002039	XLOC_051522	0	0.551085	0.299552	0.433644	0.383133	0.284835	0.295925	0.482147	0.377289	0.417792	0.211734	0.363124
TUCP_001382	XLOC_034852	0.282928	0.372446	0.370258	0.463419	0.162515	0.161496	0.201408	0.28923	0.534712	0.532161	0.379879	0.404887
TUCP_002558	XLOC_064300	0	0	0.296125	0	0	0	0	0	0	0	0	0
TUCP_003265	XLOC_078772	0.800264	0.739225	0.74372	0.668776	0.646495	0.599981	0.71758	0.52231	0.985412	0.89462	0.844311	0.822554
TUCP_004675	XLOC_112273	115.024	86.8803	96.7391	100.544	82.2985	78.6629	69.6394	74.9985	96.2901	111.834	2.8e-05	99.3712
TUCP_003095	XLOC_075408	0.39909	7.35102	8.28894	0.238681	0.27598	7.05834	6.47058	6.65594	9.97575	0.093438	12.0289	11.7463
TUCP_004373	XLOC_104689	0.224879	0.035855	0.143751	0.01991	0.117944	0.002433	0.09774	0.591081	0.709646	0.167849	0.070459	0.246731
TUCP_000217	XLOC_006872	0.026696	0.426987	0.17249	0.088278	0.193288	0.131819	0.374654	0.165779	0.192854	0.142378	0.245794	0.126039
TUCP_004614	XLOC_111108	0.159746	0.117276	0.186119	0.176986	0.122411	0.123234	0.287285	0.155458	0.315885	0.409675	0.997502	0.408168
TUCP_005713	XLOC_136798	0.575892	0.973336	0.592677	0.885208	1.04963	0.718796	0.598036	0.918137	0.591469	0.889628	0.662104	0.835826
TUCP_003707	XLOC_092263	2.264	1.8658	1.81485	4.6934	0	2.94954	0	0	1.42153	2.97234	2.25557	1.8953
TUCP_000955	XLOC_023389	0.564561	0.009673	0.620605	0	0.185604	0	0	0	0.295431	1.25617	0.012284	0
TUCP_001702	XLOC_045222	0.512599	0.480179	0.652146	0.125579	0.697516	0.498305	0.655393	0.08976	0.748032	0.853801	0.753271	0.994337
TUCP_003594	XLOC_090436	0.332861	1.24644	0.733469	0.510128	0.580183	0.413863	0.472336	0.497258	0.734694	0.604113	0.651865	0.654992
TUCP_005425	XLOC_129225	0	0	0.003945	0	0	0	0	0.173707	0.16364	0	0.080514	0
TUCP_003098	XLOC_075479	1.73964	0.932989	1.13965	1.83808	0.262807	1.04748	0.898544	0.963672	1.7377	1.77007	1.58794	2.05926
TUCP_005508	XLOC_131136	0.079222	0.563012	0.16072	0.490787	0.224817	0.035756	0.048292	0.126856	0.366362	0.119079	0.539009	0.540393
TUCP_003439	XLOC_085114	0.444756	0.502264	0.481431	0.588474	0.499517	0.369426	0.405777	0.435552	0.611228	0.755789	0.576419	0.447115
TUCP_003748	XLOC_092958	0.220558	0.342934	0.465665	0	0.058856	0.140138	0.172657	0.116097	0.270249	0.231713	0.261744	0.19875
TUCP_002574	XLOC_064642	0.557163	0.554576	0.468289	0.843096	0.166905	0.251457	0.31072	0.368835	0.58073	0.388969	0.322426	0.183494
TUCP_001785	XLOC_046633	0.151442	2.11012	1.79587	1.61607	2.17474	1.39676	1.1818	1.54549	1.68752	2.27367	1.5683	1.68319
TUCP_001366	XLOC_034632	0	0	0	0	0	0	0	0	0.350659	0	0	0
TUCP_004042	XLOC_099629	0.606677	0.827765	0.935767	0.8505	0.735925	0.634973	0.593239	0.667834	0.971815	1.19019	1.00734	1.03314
TUCP_005745	XLOC_137608	1.24925	1.05785	0.498386	0.503856	0.513503	0.685853	0.851728	1.0468	1.18585	1.68871	0.929184	1.60508
TUCP_004848	XLOC_116512	0.832171	1.23004	0.7988	1.4757	0.949896	1.42155	1.19389	0.886635	2.98995	3.16072	1.28208	2.44936
TUCP_005276	XLOC_125998	0.682025	0.767773	0.641129	0.555439	0.743161	0.489576	0.915281	0.64839	1.04268	0.84429	0.803263	0.842087
TUCP_005546	XLOC_132176	0.556142	0.455421	0.310137	0.598165	0.4205	0.221054	0.30003	0.313402	0.620189	0.415375	0.32956	0.391893
TUCP_000332	XLOC_010804	0.569353	0.940234	0.574495	0.656252	0.784567	0.519395	0.529703	0.596585	0.721296	0.788444	0.69247	0.646988
TUCP_003474	XLOC_086431	1.192	1.06597	1.05795	2.32975	1.74094	0.469973	1.11739	1.48846	1.47203	1.58077	2.49922	2.13859
TUCP_004558	XLOC_109743	1.14877	1.32655	1.93368	2.14551	1.12772	1.05055	1.02266	1.29086	2.09847	1.79425	2.02567	1.73068
TUCP_005085	XLOC_121626	1.11933	0.94787	1.3437	0.744602	0.708252	0.716864	0.626596	1.03444	2.02804	1.54013	1.30774	1.20327
TUCP_003691	XLOC_092088	0.490726	0.583492	0.362492	0.868725	0.529691	0.42254	0.254874	0.231895	0.330984	0.2306	0.101282	0.404494
TUCP_000697	XLOC_019249	3.00943	4.28088	2.95305	5.10683	3.72142	1.9338	2.87618	2.03751	2.857	4.07237	5.27873	5.008
TUCP_001895	XLOC_049210	0.061569	0.685269	0.589587	0.917774	0	0.249295	0.949692	0	0.291114	0.395515	0.649086	0.384196
TUCP_005148	XLOC_122933	0.895095	0	0.744189	0.418127	0	0	0	0.154498	0.38603	0	0.165911	0.853901
TUCP_002741	XLOC_067397	0.780236	0.611248	0.795495	0.687572	0.747416	0.501548	0.44714	0.554135	0.673607	0.925986	0.95439	1.05628
TUCP_004544	XLOC_109305	0.018879	0.063681	0.227461	0.233796	0.280417	0.320127	0.092943	0.206759	0.438448	0.345813	0.066969	0.103798
TUCP_003529	XLOC_088184	0.119904	0.438477	0.147445	0	0.132208	0.067533	0	0	0.106029	0.14175	0	0
TUCP_004721	XLOC_113298	1.32414	1.09635	1.24551	1.74601	1.12954	0.93858	0.795949	0.734592	1.70785	1.92897	1.33465	1.43449
TUCP_002961	XLOC_072593	1.41321	3.2669	3.0884	2.9242	2.99492	2.25369	2.09093	2.21045	3.47789	3.72905	3.97453	3.49003
TUCP_001386	XLOC_035109	0.37056	0.289032	0.28087	0.341759	0.253224	0.239804	0.226439	0.224764	0.363714	0.505555	0.42478	0.349299
TUCP_001519	XLOC_039923	0.460081	0.585806	0.459411	0.445321	0.315279	0.485261	0.176962	0.35925	0.508533	0.4913	0.433976	0.495335
TUCP_004775	XLOC_114977	0.168733	0.089199	0.145578	0.302917	0.227987	0.150708	0.194851	0.148539	0.44697	0.088849	0.31849	0.381824
TUCP_000382	XLOC_012281	4.06791	6.36965	4.97803	5.73109	3.96551	4.11815	3.51686	4.35748	6.09329	5.80478	5.84652	6.16388
TUCP_005298	XLOC_126605	0.131491	0.464622	0.253492	0.720761	0.282112	0.225769	0.229378	0.230068	0.454716	0.460742	0.449352	0.504853
TUCP_003059	XLOC_075196	0.429254	0.207327	0.291293	0.310009	0.315368	0.31455	0.154881	0.267606	0.55728	0.680072	0.521282	0.380772
TUCP_002909	XLOC_071325	3.15509	1.45551	0.489173	0.455158	2.51114	0.427104	0.367436	1.07082	0.241797	0.35158	2.79438	3.00469
TUCP_003323	XLOC_081522	0.438146	0.461275	0.569776	0.22125	0.28636	0.324419	0.158139	0.314494	0.317806	0.851341	0.101193	0.503435
TUCP_004035	XLOC_099418	0	0	0	0	0	1.05512	0	0	0.006718	0	0	0
TUCP_001537	XLOC_040352	0.565164	1.00884	0.775503	0.270936	0.627014	0.498125	0.712523	0.621679	0.756255	0.804562	0.952926	0.897376
TUCP_000268	XLOC_008172	0	0	0	0	0.212033	0	0	0	0	0	0	0
TUCP_000214	XLOC_006845	1.0063	1.18295	1.00551	1.73852	0.820652	0.800303	0.789484	0.741149	1.22782	1.29006	1.18498	1.57031
TUCP_003571	XLOC_089929	0.460619	0.063215	0	0	0.370867	0.12607	0	0.040192	0	0.010017	0	0.313108
TUCP_004565	XLOC_109866	0	0.021617	0.236758	0.223179	0.290768	0.279671	0.260793	0.222794	0.544967	0.347185	0	0.187433
TUCP_004593	XLOC_110831	0.516108	0.251335	0.165913	0.344233	0.269795	0.451065	0.231904	0.120212	0.485829	0.61589	0.178866	0.481341
TUCP_003187	XLOC_077368	0.787327	0.717485	0.612158	0.882011	0.682054	0.525105	0.622624	0.473784	0.892647	1.10265	1.01795	0.705371
TUCP_004859	XLOC_116787	0.8493	0.891969	0.61293	0.833159	0.547217	0.368865	0.606521	0.48802	0.662642	0.706116	0.682683	0.832822
TUCP_001309	XLOC_032883	1.28243	0.401569	1.15532	0.609057	0.738597	0.692662	0.691991	0.534486	0.865976	1.49361	0.961975	0.806386
TUCP_002891	XLOC_070746	0.623874	1.50767	0.711277	1.00888	1.26076	0.739051	1.00158	1.03286	0.946555	0.908967	1.27297	1.2197
TUCP_002222	XLOC_056207	0.469866	0.605526	0.708038	0.404895	0.815525	0.343997	0.628649	0.523423	0.456558	0.382915	0.631669	0.530171
TUCP_003987	XLOC_097915	0.44697	0.444939	0.452378	0.610259	0.286879	0.358702	0.362603	0.527856	0.64632	0.606667	0.577687	0.425269
TUCP_003775	XLOC_093626	0.338855	0.840854	0.740241	0.596044	0.685907	0.419085	0.390393	0.245717	0.531381	0.670788	0.589225	0.522197
TUCP_002100	XLOC_053140	0.251752	0.313004	0.383575	0.580155	0.232487	0.29764	0.223848	0.204447	0.425948	0.285782	0.38812	0.323213
TUCP_000642	XLOC_018121	0.314811	0.425745	0.719939	0.4658	0.145048	0.116977	0.334022	0.444558	0.095451	0.716658	0.44484	0.820946
TUCP_003647	XLOC_091679	0.604512	0.599419	0.37906	0.751934	0.695478	0.909416	0.520751	0.578624	0.851027	0.865544	1.00032	1.13674
TUCP_000072	XLOC_002219	0.908713	0.172924	0.17449	0.288375	0.1023	0.146888	0.053132	0.048063	0.033997	0.215967	0.241518	0.065381
TUCP_004171	XLOC_101418	0	0.333351	0.437947	0	0.332779	0.471522	0.944104	0.74547	0.557943	0.547391	0	0.252172
TUCP_004150	XLOC_100966	0	0.422081	0.135377	0.296797	0.234162	0.069082	0	0.227106	0.337103	0.196521	0	0.128631
TUCP_001449	XLOC_037908	0	0	0.555784	0	0	0	0	0	0	0	0	0
TUCP_000238	XLOC_007179	0.224843	0.318106	0.214175	0	0	0	0.107316	0.480653	0.617225	0	0.215488	0.305396
TUCP_002096	XLOC_053140	0.266137	0.312836	0.376561	0.601279	0.234925	0.307307	0.226519	0.21047	0.449757	0.280146	0.399442	0.323374
TUCP_001532	XLOC_040317	4.31607	0.001307	1.3336	0.002039	0.000456	0.000479	0.000528	1.65835	0.521856	0.00063	0.00069	0.382824
TUCP_005897	XLOC_141691	0.79104	0.372725	0.300959	0.40099	0.354462	0.230566	0.371393	0.375852	0.780159	0.569952	1.12573	0.705658
TUCP_005200	XLOC_123930	1.2414	0.773182	0.898343	0.837782	0.797148	0.674113	0.5946	0.757275	0.990535	1.16619	0.949728	0.967904
TUCP_002787	XLOC_068340	0.009992	0	0	0	0	0.024629	0.020472	0	0.097211	0	0.516446	0
TUCP_002070	XLOC_052736	0.58188	0.42467	0.432771	0.576888	0.543267	0.488924	0.419618	0.471239	0.766118	0.863485	1.05418	0.508524
TUCP_000827	XLOC_020835	5.44085	4.08421	4.88384	4.07372	4.0112	4.19004	3.8251	3.43074	5.07824	6.07861	6.61355	6.29905
TUCP_003569	XLOC_089883	0.40839	0.359951	0.138078	0.616553	0.266126	0.199287	0.224192	0.303435	0.42428	0.368407	0.205366	0.179031
TUCP_001118	XLOC_026158	0.555143	0.337718	0.414035	0.432961	0.236871	0.254236	0.259552	0.160586	0.408676	0.354876	0.348505	0.439857
TUCP_001211	XLOC_030070	0	0.214438	0.136165	0.147616	0.013767	0.195519	0.144525	0	0.392682	0.320314	0.07492	0.070674
TUCP_005313	XLOC_126695	0	0.597714	0.079802	0.152081	0.159365	0.156139	0.607355	0.002669	0.487679	0.517304	0.046969	0
TUCP_000776	XLOC_020300	0.213172	0.175431	0.054423	0.042947	0.048869	0	0	0.036834	0.170313	0.057877	0.050361	0
TUCP_002417	XLOC_059799	0.283708	0.64365	0.556964	0.358797	0.075136	0.439673	0.403737	0.414608	0.532376	0.667859	0.981983	0.429479
TUCP_003851	XLOC_095573	0.094345	0.124445	0.503629	0.342949	0.397064	0.455822	0.2695	0.499489	0.696634	0.583847	0.106192	0.27786
TUCP_002915	XLOC_071496	0.220621	0.231709	0.164047	0.547045	0.162279	0.167148	0.09989	0.127137	0.290092	0.322353	0.444217	0.182865
TUCP_002389	XLOC_059445	0.704062	0.38909	0.499308	0.145887	0.239155	0	0.293948	0.442866	0.634287	0.84608	0.378362	0.242809
TUCP_004962	XLOC_118726	0	0.166086	0.145542	0	0	0.183605	0	0	0	0.285805	0	0
TUCP_002339	XLOC_058384	0.301952	0.800328	0.261051	0.514368	0.678989	0.586723	0.453737	0.384453	0.300344	0.564363	0.405437	0.266441
TUCP_005065	XLOC_120940	0.499412	0.069885	0.138072	0.205638	0.130363	0.05102	0.08963	0.160259	0.310201	0.122948	0.274867	0.547758
TUCP_000750	XLOC_020065	2.66348	1.76183	2.89134	1.93147	2.29861	1.18372	1.39791	1.74246	2.73276	3.53902	2.74623	3.09532
TUCP_004456	XLOC_107078	1.26145	1.422	1.24134	1.20111	0.899522	0.820147	0.876546	1.02081	1.22464	1.27439	1.24321	1.40897
TUCP_001767	XLOC_046495	0	0	0	0	0	0	0	0	0	0	0	0.474861
TUCP_004774	XLOC_114945	0	0.019688	0.009413	0.016353	0.022619	0.014585	0.774557	0	0	0.001945	0.016774	0.009351
TUCP_005052	XLOC_120751	0.357735	3.92108	1.9107	4.55039	2.08392	1.64982	1.84829	1.45162	2.704	2.71045	1.83049	2.58418
TUCP_002453	XLOC_060869	0	0.25423	0.437283	0.076724	0.067066	0.206308	0.187953	0.148979	0.448479	0.226145	0	0.384711
TUCP_003138	XLOC_076237	0.548875	0.732666	0.61646	0.478794	0.486753	0.563835	0.534712	0.625362	0.73181	0.909989	0.80226	0.843322
TUCP_005865	XLOC_140944	0.990662	0.263585	0.329367	0	0.85947	0.21321	0.355307	0.256479	0.437616	0.33652	0.853324	0.531015
TUCP_003714	XLOC_092298	0.438559	0.099222	0.285262	0.225171	0.443289	0.232193	0.143852	0.259545	0.374726	0.25626	0.297234	0.256734
TUCP_002367	XLOC_058841	0.31118	0.489384	0.270252	0.420987	0.388519	0.274557	0.313824	0.29866	0.731195	0.475788	0.155284	0.38445
TUCP_003126	XLOC_076021	0.015985	0.013033	0.011675	0.023688	0.016028	0.004968	0.199235	0.012215	0.333256	0.002811	0.031206	0.00951
TUCP_002835	XLOC_069314	0.156507	0.149415	0	0.333333	0.326254	0.516367	0.008006	0.163087	0.443529	0.606728	0.384689	0.084318
TUCP_002579	XLOC_064664	0.668715	0.764702	0.795704	0.762722	0.723944	0.562706	0.500126	0.539882	0.791518	2.163	1.33162	1.07021
TUCP_005169	XLOC_123566	0.311249	0.387596	0.235484	0.30686	0.268659	0.227066	0.162251	0.184724	0.376364	0.525432	0.402142	0.267952
TUCP_002006	XLOC_050745	0.787297	0.782117	0.214529	1.27009	0.129856	0.473808	0.092385	0	0.914766	0.137671	0.221079	0.213278
TUCP_000863	XLOC_021219	0.311755	0.324087	0.452781	0.424447	0.188825	0.220174	0.191757	0.251054	0.341808	0.692513	0.433881	0.240652
TUCP_000558	XLOC_016050	0	0.039005	0	0	0.036155	0	0	0.564114	0.030405	0	0	0
TUCP_002967	XLOC_072760	0.389308	0.320237	0.111999	0.117162	0.163691	0.379332	0.307072	0.076499	0.077001	0.068637	0.241395	0.226943
TUCP_004781	XLOC_115157	1.69298	1.98957	1.70469	1.35449	1.25586	1.18278	0.802737	0.891992	1.73038	2.19511	1.56029	2.29771
TUCP_005392	XLOC_128714	0.240766	0	0.209483	0.838365	0.33936	0.009189	0.373659	0.176345	0.566107	0.39567	0.367125	0
TUCP_005373	XLOC_128383	0.168362	0.12424	0.192832	0.154874	0.234588	0.188853	0.141772	0.146742	0.198552	0.126652	0.117454	0.156283
TUCP_003029	XLOC_074412	0.137609	0.374336	0.350683	0.34203	0.1899	0.435674	0.311441	0.316187	0.414252	0.740254	0.549978	0.26192
TUCP_002228	XLOC_056450	0.895987	0.47999	0.539267	0.215063	0.535915	0.535685	0.258863	0.163894	0.508317	0.433844	0.064914	0.458969
TUCP_004124	XLOC_100506	0.200152	0.268476	0.268633	0.419631	0.344731	0.293355	0.224429	0.32555	0.090632	0.451142	0.109361	0.146349
TUCP_004586	XLOC_110737	1.09463	0.672264	1.07368	1.09334	1.15713	0.782562	0.835025	0.934025	1.06813	1.26132	1.06682	0.225164
TUCP_000785	XLOC_020315	0	0.792877	0.337478	0.962928	0.03851	0.000253	0.023257	0.323656	0.937168	0.770205	0	0.397492
TUCP_000593	XLOC_017014	0	0.502023	0.161854	0	0.551244	0.578044	0.293403	0.525467	0.901372	0.761678	0	0.254433
TUCP_001880	XLOC_048166	0.343087	0.444276	0.443365	0.443401	0.370468	0.395635	0.557971	0.324938	0.567494	0.415288	0.485734	0.648506
TUCP_001248	XLOC_030910	0.615601	0.769872	0.779578	1.11566	0.883725	0.804664	0.653098	0.685103	0.704267	0.64775	1.01933	0.822283
TUCP_003294	XLOC_079380	0.384457	0.539228	0.562798	0.397892	1.25404	0.062945	0.356978	0.549802	0.619149	0.639949	0.807033	0.611782
TUCP_002047	XLOC_051739	0.662702	1.03758	0.800598	0.808551	0.679905	0.873539	0.760926	0.593722	1.09448	1.01304	1.23323	1.21264
TUCP_005395	XLOC_128816	0.324635	0.123572	0.591423	0.496973	0.090622	0.203531	0	0.439135	0.506676	0.459191	0.365776	0.693163
TUCP_005274	XLOC_125990	2.17285	5.19715	3.22282	5.24726	3.38578	2.50314	2.3821	3.31387	3.80609	4.42915	3.50307	3.58937
TUCP_001119	XLOC_026356	0.798351	0.643678	0.170977	0.283929	0.041221	0.119551	0.285584	0.532044	0.306377	0.439535	0	0.184694
TUCP_004656	XLOC_112077	0.337539	0.155302	2.01796	0.433687	1.25047	1.1246	1.36347	0.147626	0.456662	0.327731	1.67173	1.42104
TUCP_002907	XLOC_071195	0	0	0.006656	0.007695	0	0.060386	0	0.037312	0	0.040672	0	1.48857
TUCP_004911	XLOC_117527	0.331094	0.376484	0.402455	0.410807	0.223	0.24637	0.248862	0.320449	0.610185	0.354842	0.507179	0.498818
TUCP_005189	XLOC_123795	1.84452	0.141258	0.261707	0.289215	0.185113	0.220153	0.259734	0.288472	0.191725	0.310664	0.231692	0.214062
TUCP_004408	XLOC_105750	0.178948	0.572407	0.293846	0.433832	0.64665	0.415484	0.373639	0.4518	0.865466	0.623818	0.523961	0.840534
TUCP_005627	XLOC_134423	1.07586	1.51559	1.24589	1.72167	1.03377	0.948294	0.775045	1.13869	1.47237	1.608	1.59072	1.58947
TUCP_005239	XLOC_125541	1.07146	0.790284	1.15661	1.10401	0.539277	0.496447	0.632062	0.578775	1.2804	0.886411	0.908835	0.890564
TUCP_000040	XLOC_000996	0.185985	0.983986	0.964804	0.803166	0.71925	0.63623	0.922921	0.607001	0.970712	1.49941	0.79579	1.06229
TUCP_000825	XLOC_020815	0	0	0	0	0	0	0	0	1.71321	0	0	0
TUCP_002379	XLOC_059055	0.31619	0.145185	0.230367	0.365367	0.143848	0.185548	0.180541	0.15873	0.257191	0.452258	0.277522	0.249543
TUCP_004999	XLOC_119831	0.301414	0.739448	0.743888	1.36275	0.650921	0.586479	0.051316	0.605947	0.709289	0.878637	0.744273	0.62774
TUCP_003411	XLOC_083723	0.503771	0.51444	0.521521	0.672806	0.342213	0.372632	0.324266	0.375749	0.713844	0.693001	0.813888	0.54139
TUCP_005155	XLOC_123309	0.568805	0.938049	0.964275	1.03571	0.930326	0.846105	0.957744	0.860181	1.37907	1.3011	0.990772	1.28432
TUCP_002082	XLOC_052979	1.12312	0.597736	1.43705	0.940204	0.576615	0.483381	0.671865	0.734853	0.974157	1.06148	0.92584	0.904099
TUCP_000623	XLOC_017329	0.433443	6.22585	4.5255	4.53517	4.39613	1.94037	1.84812	2.85815	3.96111	4.16233	4.03255	4.26946
TUCP_005004	XLOC_119994	1.94467	5.83092	4.43541	7.80327	5.4904	4.90816	3.91461	4.83992	5.29404	6.06955	4.29734	5.57822
TUCP_002173	XLOC_055363	0.472212	0.671085	0.567436	0.743312	0.613709	0.452343	0.459417	0.419283	0.625262	0.870529	0.654603	0.739761
TUCP_001181	XLOC_028774	0.357305	0.185467	0.261814	0.215256	0.107593	0.214465	0.115624	0.154845	0.357006	0.218585	0.379419	0.627043
TUCP_001806	XLOC_046783	0.318524	0.235709	0.804214	0.993863	0.359799	0.883785	0.475432	0.698447	0.784498	1.15657	1.08417	0.962197
TUCP_002122	XLOC_053954	0	0	0	0	0.062364	0.070802	0.025327	0	0.167304	0	0.082153	0.688841
TUCP_004406	XLOC_105594	0.26495	0.138209	0.143073	0.086589	0.159636	0.146461	0.149264	0.183882	0.135279	0.44379	0.485892	0.205475
TUCP_004065	XLOC_099860	0.338312	0.94048	0.267094	0.289985	0.623025	0.506493	0.551115	0.166346	0.920346	0.168601	0.699007	1.45889
TUCP_002204	XLOC_055907	0.646644	0.267556	0.083121	0.243775	0.979456	0.579739	0.185025	0.162037	0.843679	1.2529	0.863708	1.18548
TUCP_003273	XLOC_078850	1.37353	2.17244	2.03515	1.76533	1.53792	1.98672	1.36041	1.57122	1.88862	1.83365	1.64235	1.91972
TUCP_000087	XLOC_002530	0.366438	0.54149	0.146666	0.36097	0.293464	0.261138	0.213135	0.299224	0.487656	0.580849	0.473844	0.372039
TUCP_001776	XLOC_046566	0.45116	0.202841	0.303714	0.402675	0.347365	0.242462	0.376818	0.524558	0.26065	0.243482	0.220549	0.37063
TUCP_002673	XLOC_066448	0.076747	0.298285	0.298892	0.640416	0.246469	0.319839	0.324153	0.348381	0.438487	0.34701	0.282975	0.301162
TUCP_000295	XLOC_009228	1.14378	0.243986	0.342534	0.726596	0.332226	0.320167	0.435928	0.27229	0.524457	0.481094	0.461808	0.585481
TUCP_000062	XLOC_001984	1.93746	1.13803	1.59558	0.787486	1.06238	0.789958	1.12456	1.65074	1.40377	1.88798	1.79126	1.5949
TUCP_002603	XLOC_064998	0.191888	0.243764	0	0.049647	0	0	0.160539	0.203064	0.134561	0.188124	0.144744	0
TUCP_002594	XLOC_064917	0	0	0	0	0	0.284399	0.345733	0	0	0	0.306847	0.827799
TUCP_004792	XLOC_115443	0.787473	0.63501	0.753401	0.407665	0.654226	0.721988	0.66872	0.511926	0.577413	0.591742	0.845109	0.545738
TUCP_003938	XLOC_096784	0.315369	0.972355	1.14356	0.941044	0.372269	0.761035	0.944778	0.571048	1.61882	1.31468	1.04499	0.713774
TUCP_002975	XLOC_073342	0.344062	1.00269	0.053655	0.722023	0.283052	0.30824	0.103801	0.102148	0.488584	0.796051	0.248463	0.561506
TUCP_005336	XLOC_127018	0.522548	0.938016	0.64606	0.055982	0.840021	0.660488	0.709776	0.449609	0.63078	0.666228	1.18768	0.700514
TUCP_003907	XLOC_096155	0.843061	1.42425	1.1702	1.45446	1.71096	1.01485	0.629139	0.575741	1.57237	1.56564	1.19082	1.43219
TUCP_002272	XLOC_057039	0.443322	1.17927	0.699859	0.876639	0.953099	0.492756	0.582072	0.890589	0.719583	0.857325	0.539387	0.854246
TUCP_003092	XLOC_075394	0.292678	0.199895	0.19918	0.193342	0.172219	0.204287	0.239642	0.171486	0.190541	0.227184	0.279718	0.386848
TUCP_004671	XLOC_112263	0.701428	1.46094	1.02474	1.30209	0.958673	0.69587	0.737116	1.01182	1.3575	1.36188	0.94834	1.30181
TUCP_002732	XLOC_067219	0.589596	0.505365	0.124478	0.933483	0.069809	0.150156	0.439454	0.033453	1.09793	0.81912	0.724469	0
TUCP_005671	XLOC_135449	0.560635	0.529484	0.627235	0.797158	0.674957	0.434158	0.534093	0.398977	0.61221	0.909749	0.888131	0.819191
TUCP_000128	XLOC_003836	0.210439	0.88786	0.765103	0.969159	0.350369	0.452572	0.416393	0.286944	0.727377	1.11562	0.37403	0.902945
TUCP_002328	XLOC_058307	1.34705	5.02965	4.12774	8.46902	3.71622	3.04669	2.3212	4.74833	6.3476	7.5518	4.21746	3.96632
TUCP_000080	XLOC_002438	1.38055	5.06705	0.183306	6.3524	0.415946	3.79776	3.79081	2.26274	5.32334	5.41171	0.95187	5.95212
TUCP_003212	XLOC_077773	1.22803	0.793342	0.283561	0.87945	0.70862	0.201767	0.647885	0.779368	0.872764	0.234647	0.365497	0.772175
TUCP_003678	XLOC_091915	0.366903	0.106344	0.861975	1.20414	0.129528	0.56367	0.206864	0.332766	0.886307	1.0546	1.4622	0.886855
TUCP_001024	XLOC_024016	0.074845	0	0.617667	0	0	0	0	0	0.18563	0	0	0
TUCP_002200	XLOC_055839	0.529411	0.453417	0.541569	0.273213	0.337224	0.266718	0.31263	0.419463	0.307757	0.770861	0.38407	0.545799
TUCP_003030	XLOC_074445	0.86324	0	0	0	0	0	0	0	0.321684	0	0	0.003358
TUCP_004658	XLOC_112077	0.329786	0.658568	0.797084	0.326384	0.701958	0.649883	0.74434	0.6643	0.191848	0.752358	0.846548	0.887909
TUCP_003741	XLOC_092598	1.51743	1.32116	1.6023	1.56783	1.44238	1.17973	1.41916	1.51879	2.26033	2.23877	2.96217	2.32289
TUCP_002058	XLOC_052236	0.281853	0.331915	0.37151	0.517463	0.300697	0.273107	0.285063	0.335964	0.524121	0.40885	0.522282	0.506414
TUCP_004323	XLOC_103882	0.259048	0.115876	0.191794	0.060091	0.331646	0.066419	0.03818	0.229668	0.35737	0.335334	0.520031	0.405066
TUCP_004516	XLOC_108570	0	0.598873	0.172084	0.658362	0.339403	0	0.136909	0.181419	0.915266	0.289472	0.362885	0.477481
TUCP_000296	XLOC_009337	0.938423	5.62663	6.22309	6.70838	4.39304	3.74031	2.26328	4.2409	5.97154	7.94433	7.19758	7.43556
TUCP_004828	XLOC_116323	0.070714	0.328397	0.005493	0	0.657451	0	0.004139	0.667507	0	0	0	0
TUCP_004872	XLOC_116901	5.32498	3.70072	3.92826	4.16546	3.02948	3.15085	3.23983	3.3466	3.9439	4.25556	4.8548	4.71093
TUCP_000519	XLOC_015629	1.32902	0.885441	0.944731	0.898293	0.667843	0.665488	0.693916	0.731326	1.0215	1.51787	1.31887	1.23226
TUCP_001182	XLOC_028783	0.703874	0.716864	0.616677	0.772602	0.590332	0.539549	0.469878	0.466747	0.796929	0.761607	0.664686	0.72557
TUCP_002876	XLOC_070024	0.657515	0.327081	0.394267	0.359527	0.109358	0	0.368887	0.080241	0.431169	0	0.545031	0.26473
TUCP_005870	XLOC_140980	19.9187	7.73043	10.6097	4.28016	3.81635	8.16961	7.70927	7.97709	4.70082	13.3005	12.0834	16.3175
TUCP_002373	XLOC_058886	0.56157	1.05287	0.798272	1.05755	0.775801	0.586712	0.487655	0.459047	0.787508	0.871276	0.909652	0.868849
TUCP_004858	XLOC_116785	0.36956	1.81904	0.662013	0.862771	0.544936	1.29717	0.578978	1.56761	2.51226	1.13353	2.27997	2.23744
TUCP_005568	XLOC_132747	0.209519	0.476744	0.384445	0.61225	0	0.250624	0.541354	0.522147	0.826586	0.990488	0.313555	0.917914
TUCP_000474	XLOC_014966	0.465753	0.318887	0.435661	0.377058	0.403285	0.415683	0.276467	0.312249	0.444326	0.467318	0.401069	0.441864
TUCP_005221	XLOC_124393	0.07415	0.4652	0	0.080732	0.219866	0.216269	0.077987	0.424295	0.332961	0.28685	0.295704	0.209161
TUCP_000279	XLOC_008405	6.20431	2.90083	2.93264	3.339	3.09698	2.3598	2.5626	2.99286	3.98129	4.56856	5.37236	4.39328
TUCP_001286	XLOC_031669	1.04043	0.399394	0.294554	0.551168	0.269196	0.460604	0.531774	0.286904	0.374525	0.332584	0.47596	0.416454
TUCP_001113	XLOC_025361	0.527375	0.693007	0.577676	0.465394	0.632785	0.358713	0.377767	0.501461	0.866366	0.75976	0.669749	0.844229
TUCP_004986	XLOC_119313	0.308721	0.38402	0.486736	0.306992	0.269747	0.175305	0.219206	0.292458	0.254071	0.318439	0.251334	0.537556
TUCP_000039	XLOC_000895	0.759516	0	0	0	0	0	0	0	0	0	0	0
TUCP_005038	XLOC_120275	0.265339	0.226417	0.319848	0.364752	0.170199	0.128618	0.157766	0.210022	0.321152	0.351959	0.403424	0.504959
TUCP_003746	XLOC_092782	0.519894	0.740072	0.75329	1.29857	0.653052	0.666403	0.600087	0.61293	0.923679	1.04702	0.846601	0.801717
TUCP_005875	XLOC_141411	0.201732	0.300071	0.062358	0.491789	0.264701	0.195832	0.096586	0.158429	0.179957	0.268671	0.280486	0.282349
TUCP_004860	XLOC_116824	4.79684	7.26054	6.6432	6.85209	6.76039	5.56083	4.42062	5.53805	6.97226	7.97576	6.16261	6.10379
TUCP_005538	XLOC_132002	52.3307	43.9784	45.6704	47.4453	39.0652	33.502	36.1437	33.8019	53.2586	62.4233	60.7332	62.032
TUCP_002248	XLOC_056841	0	0	0	0	0	0	0	0	0.028634	0	0	0
TUCP_004786	XLOC_115276	1.36693	1.57499	1.70325	2.22661	1.27967	1.1684	1.44392	1.28279	1.84152	1.44121	1.75701	1.93921
TUCP_005131	XLOC_122383	0.142282	1.96401	0.630135	0.493717	0.514331	0.923564	0.080289	0.256286	0.853244	0.028064	0.001507	0.121308
TUCP_004172	XLOC_101418	2.93506	3.53463	3.47307	2.53227	2.47927	3.37957	2.42538	2.6718	1.85146	3.0328	2.90122	3.00772
TUCP_003516	XLOC_087309	0.21479	0.631312	0.557323	0.409537	0.358658	0.454998	0.0504	0.243853	0.534689	0.448887	0.523363	0.587338
TUCP_000732	XLOC_019812	0.265391	0.199518	0.583658	0.528569	0.414309	0.247797	0.373554	0.314089	0.579197	0.533483	0.532172	0.583557
TUCP_000147	XLOC_004288	0.290831	0.880932	0.551628	0.864517	0.737291	1.04016	0.528183	0.626009	0.966828	1.17845	1.02923	0.938124
TUCP_000004	XLOC_000125	0	0.030682	0	0	0.961452	0	0	0.752762	0.010998	0	0.024597	0.015111
TUCP_005225	XLOC_124502	0.457739	0.573273	0.443612	0.497561	0.301798	0.367882	0.409463	0.507538	0.836852	0.541699	0.676328	0.654359
TUCP_002735	XLOC_067245	1.05026	1.18271	1.15982	0.829409	0.591457	0.761028	0.757809	0.76799	1.18487	1.3389	1.2504	1.1359
TUCP_005031	XLOC_120236	0.033252	0.839698	0.005516	0.033161	0.56209	0	0.207127	0.491398	0.248684	1.0255	0.58852	0.863762
TUCP_003637	XLOC_091563	0.206383	0.179681	0.255818	1.08739	0.045019	0.399359	0.286473	0.300528	0.432883	1.0495	0.367842	0.334948
TUCP_001333	XLOC_033433	0.058848	0.6567	0.229526	0	0.032843	0.127681	0.115923	0.076584	0.023643	0.432361	0.078647	0.045215
TUCP_005796	XLOC_139185	0.040161	0	0.213454	0.21834	0.248981	0.410759	0.083169	0.210126	0.180339	0.253912	0	0.126029
TUCP_003377	XLOC_082452	0.525862	0.333276	0.353334	0.372223	0.279595	0.222635	0.192108	0.217461	0.295139	0.317494	0.111427	0.281797
TUCP_001006	XLOC_023902	0.2488	0.250354	0.3122	0.368275	0.159117	0.431604	0.196479	0.160627	0.333807	0.310169	0.590469	0.341946
TUCP_001046	XLOC_024254	1.34781	1.64776	1.63491	1.79078	1.60279	0.893766	1.15983	1.13495	1.65144	1.89027	1.54757	1.76253
TUCP_005000	XLOC_119873	0.367189	0.303584	0	0.306717	0.209557	0.094122	0.114632	0.123752	0	0.577923	0.460557	0.210701
TUCP_003800	XLOC_094305	0.431594	0.886812	1.02604	1.12081	0.782495	0.580387	0.851822	0.771463	1.03147	1.24312	1.17695	1.05975
TUCP_002688	XLOC_066599	0.847273	0.409655	0.739369	0.704845	0.502627	0.497617	0.467599	0.42759	0.428811	0.735057	0.668921	0.775393
TUCP_002414	XLOC_059771	0.96568	1.16355	1.40326	1.83388	1.33484	0.985471	0.953518	0.858538	1.8723	2.10304	2.5696	1.86038
TUCP_002762	XLOC_067786	2.04941	1.76289	1.2552	1.5027	1.76609	1.37248	1.39694	2.02159	1.38532	2.65115	2.39543	2.30898
TUCP_004776	XLOC_114979	0.525585	0.222243	0.292377	0.349748	0.049447	0.212469	0.280658	0.19229	0.376545	0.235932	0.201119	0.268364
TUCP_000675	XLOC_018981	1.48375	2.53507	2.18154	2.5148	1.83002	1.56514	1.78494	1.60106	2.57181	2.94591	2.15594	2.43719
TUCP_001573	XLOC_041179	0.119069	0.114108	0.295521	0.363771	0.240737	0.464069	0.43163	0.127131	0.487134	0.426341	0.249278	0.314968
TUCP_004980	XLOC_119295	0.549769	2.31537	1.9383	3.26781	1.00033	0.93187	0.998209	0.841398	1.43206	1.88907	2.74284	1.58862
TUCP_000053	XLOC_001609	0.230994	0.391482	0.346957	0.824078	0.318269	0.321662	0.318843	0.245999	0.58261	0.764266	0.596433	0.494481
TUCP_001261	XLOC_031171	4.44929	2.51064	4.12304	2.28617	4.18816	2.35901	3.39592	3.27066	4.48608	4.47563	4.48805	5.51203
TUCP_004246	XLOC_102870	0	0	0	0	0	0.002661	0	0	0	0.372784	0	0
TUCP_005647	XLOC_134683	0.344065	0.229117	0.335335	0.361173	0.331722	0.297562	0.184559	0.437098	0.47486	0.411302	0.304537	0.395618
TUCP_004477	XLOC_107421	0.250307	0.564305	0.362183	0.372932	0.43598	0.615685	0.494261	0.492576	0.650278	0.845267	0.702021	0.207099
TUCP_001221	XLOC_030546	0.604526	0.441072	0.973811	0.36162	0.627662	0.592547	0.648604	0.401624	0.776407	0.811133	1.1504	0.695381
TUCP_004308	XLOC_103662	0.755059	0.931995	0.789086	1.01995	0.595394	0.620414	0.657476	0.600638	1.03642	1.00338	0.920582	1.09519
TUCP_002837	XLOC_069433	0.135523	0.513811	0.391729	0.346326	0.118468	0.357303	0.301116	0.178196	0.469525	0.517339	0.480183	0.625082
TUCP_004370	XLOC_104621	0.333419	0.564459	0.266648	0	0	0.594094	0.260985	0	0.332162	0.395518	0.802707	0.5724
TUCP_000352	XLOC_011648	0.21527	0.308479	0.21764	0.453725	0.243083	0.39933	0.472378	0.212427	0.223339	0.449526	0.471515	0.414324
TUCP_005050	XLOC_120522	0.440162	0.337983	0.395018	0.579729	0.291272	0.314261	0.665799	0.28809	0.423465	0.571635	0.455928	0.236923
TUCP_000303	XLOC_009468	0.190421	0.2327	0.411063	0.233222	0.186967	0.254572	0.215066	0.230419	0.198126	0.36587	0.409957	0.566595
TUCP_005639	XLOC_134537	0	0	0	1.14077	0	0.031392	0	0.004718	0	0	0.008497	0
TUCP_001614	XLOC_042357	1.19231	1.01093	0.910159	0.378115	0.490901	0.391643	0.34821	0.584816	0.65238	1.21727	1.17141	0.584589
TUCP_001547	XLOC_040393	0.853742	0.97543	1.11196	0.297559	0.652974	0.432668	0.959647	0.330623	0.777974	0.601525	0.295812	0.166922
TUCP_004170	XLOC_101418	0.676966	0.876371	0.748619	1.23801	0.567931	0.503456	0.54462	0.445352	1.06664	0.538754	0.534651	0.798734
TUCP_003181	XLOC_077336	0.446044	0.969136	1.01035	1.43576	0.819959	0.622948	0.630053	0.786581	0.923588	1.15654	0.821942	1.06157
TUCP_004654	XLOC_112060	0.13141	0.217612	0.205199	0.143017	0.122025	0.225493	0.238555	0.19887	0.236076	0.495689	0.346997	0.287964
TUCP_002017	XLOC_051064	0.391304	0.893831	0.643853	0.803421	0.510001	0.467457	0.46804	0.535509	0.867848	1.06768	0.488321	0.903245
TUCP_003914	XLOC_096212	0.86622	0.249602	0.720499	0.138784	0.026136	0.75485	0.802502	0.773422	0.111603	0.95207	0.079038	0.080047
TUCP_004446	XLOC_106744	0.686219	0.462244	0.283188	0.254181	0.33153	0.379508	0.284215	0.299383	0.46958	0.323137	0.706903	0.559755
TUCP_003124	XLOC_075905	0.729146	0.541091	0.925941	1.22742	0.528874	0.555352	0.822457	0.647863	1.18853	1.21074	1.21589	1.16519
TUCP_002528	XLOC_063683	0.618698	0.489995	0.459822	0.498328	0.36264	0.395093	0.406588	0.288098	0.521557	0.555552	0.501677	0.575649
TUCP_003536	XLOC_088216	2.02779	1.68984	1.7445	1.7894	1.49887	1.09964	1.09222	1.37506	1.73342	2.14776	1.83449	1.91234
TUCP_003610	XLOC_091132	0.534585	0.65831	0.594335	0.918818	0.517764	0.423302	0.52605	0.49374	0.750669	0.858084	0.699123	0.734082
TUCP_005729	XLOC_137096	0.45155	0.197176	0.30395	0.176133	0.903433	0.093908	0.192713	0.593659	0.183012	0.105818	0.463535	0.460046
TUCP_002563	XLOC_064387	0.852989	0.793749	0.775824	0.814844	0.631263	0.449483	0.512819	0.493632	0.961969	1.45771	1.45773	1.08526
TUCP_001487	XLOC_039069	1.16021	0.250289	0.231356	0.046115	0.234991	0.226755	0.17138	0.104961	0.200466	0.154591	0.270943	0.108699
TUCP_000266	XLOC_008172	0.411556	0.497893	0.605209	0.604986	0.431738	0.442865	0.273108	0.338825	0.419832	0.130781	0.668003	0.745504
TUCP_003720	XLOC_092364	0	0	0	0	0	0.552349	0	0	0	0	0	0
TUCP_004038	XLOC_099533	0.378317	0.654145	0.273473	1.2458	0.486686	0.235084	0.546682	0.535918	0.639941	0.661376	0.464786	0.59537
TUCP_001786	XLOC_046635	2.87225	1.57696	1.7847	2.62388	1.06266	0.950983	1.75355	1.2347	2.23776	1.83617	1.81967	1.96695
TUCP_003293	XLOC_079376	0.938981	0.581132	0.684042	0.712632	0.622269	0.475878	0.493951	0.463872	0.929712	0.746794	0.773881	0.893495
TUCP_003655	XLOC_091712	0	0.137348	0.592934	0.032925	0.14409	0.202255	0.132666	0.120417	0.158056	0.370405	0.343248	0.264545
TUCP_005652	XLOC_134929	0	0	0	0	0	0	0	0	0	0	0	1.22816
TUCP_003676	XLOC_091839	0.350466	0.229727	0.037999	0	0.167131	0	0.217612	0.21108	0.078686	0.231293	0.300321	0
TUCP_000524	XLOC_015651	0.41223	0.738304	0.351505	0.861675	0.592751	0.325693	0.330298	0.310037	0.579255	0.458866	0.531937	0.425676
TUCP_002804	XLOC_068576	0.249346	0.007917	0.215757	0.185597	0.296254	0.194511	0.155568	0.204911	0.319268	0.424987	0.286625	0.348151
TUCP_005140	XLOC_122746	0.684107	0.78961	0.435799	0.512952	0.739092	0.619804	0.526274	0.749028	0.39719	0.165072	0.923639	0.19618
TUCP_004208	XLOC_102356	0	0.014901	0.44466	0	0	0.139576	0	0	0.525117	0	0.285329	0.532625
TUCP_005461	XLOC_130329	0.556766	0.391364	0.428557	0.361186	0.313198	0.390888	0.293898	0.369233	0.353016	0.498562	0.375154	0.425571
TUCP_003642	XLOC_091615	0.861518	0.695921	0.931538	0.900027	0.811621	0.652738	0.501903	0.64548	0.880575	1.14301	1.02633	1.08918
TUCP_004873	XLOC_116901	1.21048	0.044279	0.225062	0.62146	0.314722	0.180315	0.061563	0.50418	1.01786	0.399094	0.372497	0.396636
TUCP_003777	XLOC_093704	0.093063	0.05138	0.202972	0.050661	0.043678	0.031734	0.113806	0.025669	0.553655	0.044038	0.028277	0.046675
TUCP_001787	XLOC_046635	0.446982	1.67566	1.14846	1.72817	1.66975	1.48693	0.797268	1.00471	1.41151	2.21343	1.86757	2.20092
TUCP_001989	XLOC_050505	0.487035	1.19429	0.996703	1.4576	0.874243	0.862632	1.04716	1.04581	1.48626	1.55296	1.61332	1.57997
TUCP_005375	XLOC_128386	0.100215	0.237176	0.221868	0.530218	0.173988	0.223688	0.212812	0.341037	0.29521	0.520186	0.265792	0.50176
TUCP_000060	XLOC_001981	6.81943	2.70519	4.41796	3.6398	3.27028	2.24352	2.08524	1.83848	3.10373	3.84284	3.33352	1.9742
TUCP_004223	XLOC_102527	1.13897	1.07784	1.06288	0.995958	0.880005	0.775684	0.939216	0.767308	0.710493	0.961784	0.627858	0.904444
TUCP_004943	XLOC_118040	0.607462	0.113472	0.341759	0.445008	0.260113	0.261659	0.383315	0.179203	0.378085	0.333046	0.878821	0.078724
TUCP_004444	XLOC_106737	0.618133	1e-06	0.596864	0.561143	0.488082	0.432548	0.359187	0.369342	0.447108	0.477184	0.740564	0.756558
TUCP_002721	XLOC_067100	0.161381	0.303862	0.647911	0.524073	0.415069	0.578043	0.174082	0.538691	0.242344	0.531814	0.754853	1.04485
TUCP_001535	XLOC_040317	1.79824	0.695034	4.5016	0.130553	0.722805	0.138915	0.407556	1.02318	0.564521	0.75945	0.609294	0.00181
TUCP_001943	XLOC_049831	2.60184	1.69045	2.53925	3.3569	2.10568	1.75268	1.79564	1.66018	2.73898	2.60444	2.44811	2.66303
TUCP_004066	XLOC_099860	1.94193	0	1.16434	2.36442	0.000498	0	0	1.24804	1.13906	0.5468	0	0.523533
TUCP_003024	XLOC_074364	0	0	0	0	0	0	5.50175	0	0	0	0	0
TUCP_003727	XLOC_092450	0.703618	1.24277	0	0.002404	7.6e-05	0	0.912132	0.001695	0.125974	0	0	4.4e-05
TUCP_005034	XLOC_120241	1.08589	0.87959	0.283392	1.28794	0	1.14541	1.5332	0.466394	0.865673	0.947126	1.4785	1.20013
TUCP_004700	XLOC_112729	1.00624	0.007498	0.003986	1.53381	0	0	0.504217	0.682484	0	0.008653	0.007407	0.398333
TUCP_005555	XLOC_132607	1.78459	1.84322	2.83842	1.82776	2.87634	1.76465	2.92578	3.18127	2.8367	2.55371	2.55544	2.91287
TUCP_001257	XLOC_030994	0.395853	0.507038	0.587794	0.475599	0.397426	0.372238	0.42249	0.434635	0.710887	0.569674	0.540377	0.553274
TUCP_003035	XLOC_074517	0	0	0.00389	0	0	0.346963	0	0	0.505663	0.240306	0.449944	0.220292
TUCP_001343	XLOC_033668	0.647232	0.181443	0.367141	0.303656	0.19158	0.33204	0.269057	0.163353	0.280397	0.152911	0.427611	0.125208
TUCP_004930	XLOC_117881	1.03164	0.904152	1.90367	1.60902	0.825518	1.01842	0.617967	1.38597	1.62281	0.962433	1.11799	1.07928
TUCP_001059	XLOC_024451	2.23755	1.91454	2.26222	2.09123	2.01493	1.79504	1.77214	1.51659	2.32736	3.06663	2.83539	3.03965
TUCP_000753	XLOC_020103	0.445154	0.337973	0.429182	0.403025	0.6941	0.51646	0.238896	0.306301	0.536741	0.647006	0.574004	0.754987
TUCP_003898	XLOC_096104	0.282748	0.084473	0.159411	0.252792	0.111643	0	0	0	0.046021	0.182732	0	0.151508
TUCP_001060	XLOC_024455	2.13385	0.929413	0.829368	0.756564	0.622832	0.42559	0.468594	0.366847	0.664866	1.10218	1.1139	0.763742
TUCP_004404	XLOC_105576	0.701269	0.720501	0.595033	1.07883	0.574535	0.658353	0.720768	0.722407	0.758948	0.688921	0.672246	0.665046
TUCP_004840	XLOC_116435	0.606968	0.386559	0.237574	0.32495	0.294003	0.341549	0.349061	0.406413	0.446785	0.298664	0.257298	0.403309
TUCP_004547	XLOC_109306	1.23918	1.03416	1.31998	1.44298	0	0.363979	0	0.856242	1.15083	0.996408	1.09603	1.00157
TUCP_005096	XLOC_122087	42.6765	49.6072	55.9556	57.4717	43.3321	42.7348	39.5325	38.927	59.8406	64.0949	68.1246	60.1365
TUCP_003818	XLOC_094918	0.12244	0.687499	0.372824	0.702382	0.383715	0.258186	0.476424	0.312569	0.587961	0.608932	0.420933	0.383412
TUCP_003966	XLOC_097502	0.263426	0.371796	0.212685	0.492112	0.190817	0.272605	0.080781	0.311375	0.248747	0.378283	0.280017	0.392313
TUCP_002980	XLOC_073380	0.921877	0	0.390736	0.599455	0	0	0.427758	0.238502	0.652484	1.05162	0.518574	0.409199
TUCP_005244	XLOC_125573	0	0	0	0.88227	0	0	0	0	0.002305	0	0	0
TUCP_005482	XLOC_130558	0.633398	0.56407	0.541454	0.490474	0.367342	0.355695	0.329586	0.463578	0.590583	0.531094	0.542331	0.521681
TUCP_001627	XLOC_042874	0.175647	0.185204	0.324157	0.669331	0	0.187191	0.419402	0.16432	0.395147	0.092181	0.351401	0.210984
TUCP_002519	XLOC_063353	0.409568	0.403183	0.472815	0.384173	0.226656	0.298649	0.350055	0.306377	0.535831	0.59499	0.482885	0.497996
TUCP_002081	XLOC_052977	0.366939	0.529909	0.63976	0.4505	0.391406	0.343672	0.286166	0.32692	0.45267	0.53155	0.579101	0.640459
TUCP_003133	XLOC_076087	0.035515	0.026257	0.016804	0.006482	0.063695	0.034683	0.454689	0.045478	0.048164	0.015235	0.899739	0.523256
TUCP_005320	XLOC_126738	0	0	0	0.37968	0	0	0	0.174488	0.152397	0	0	0
TUCP_002496	XLOC_062689	0.484503	0.561344	0.494985	0.547611	0.347594	0.545231	0.501297	0.43221	0.771025	0.769661	0.780209	0.624725
TUCP_000891	XLOC_021903	0	0.561945	0.814237	0	1.04993	0	0.86828	0.327773	0	0.833666	1.19322	0.480932
TUCP_001807	XLOC_046783	1.04856	1.05937	0	0	0.77814	0	0	0	0	0	0	0.204554
TUCP_001936	XLOC_049730	0	0.322203	0.442537	0.351896	0.030235	0.00559	0.00787	0.097513	0.316099	0.010157	0.004825	0.470349
TUCP_000545	XLOC_015804	0.70291	0.465667	0.702655	0.944798	0.430769	0.512318	0.565385	0.518582	0.801533	0.548042	0.647053	0.52988
TUCP_004735	XLOC_113638	0	1.72884	0.860979	2.73354	0.884391	1.26397	1.8137	0.727902	0.527451	0.721703	0.571013	1.02165
TUCP_002633	XLOC_065543	0.882758	0.572889	0.63563	0.524601	0.603829	0.454732	0.368268	0.386344	0.65392	0.65622	0.538352	0.546049
TUCP_001931	XLOC_049668	0.501891	1.88799	1.79914	3.39014	1.25741	1.09915	1.09939	1.03928	1.62559	2.65408	1.91407	2.53721
TUCP_001312	XLOC_033084	0.270419	0.325872	0.334616	0.342286	0.240663	0.276362	0.386436	0.317756	0.509421	0.583077	0.374962	0.53898
TUCP_001872	XLOC_047952	0.179429	0.378663	0.254523	0.369277	0.228347	0.192656	0.078832	0.244936	0.340316	0.303136	0.317458	0.481946
TUCP_005668	XLOC_135288	0.234733	0.270687	0.561419	0.805526	0.628557	0.294002	0.063946	0.306441	0.432398	0.425302	0.502669	0.515696
TUCP_004487	XLOC_107525	0.96639	0.911167	0.814802	1.35204	0.766016	0.668059	0.823993	0.816324	1.27046	1.1881	1.24932	1.33977
TUCP_005360	XLOC_127665	0.424476	0	0	0	0	0	0	0	0	0	0.278358	0
TUCP_005356	XLOC_127638	1.05745	0.11636	0.061755	0.014925	0.080949	0.018401	0.00999	0.123241	0.783857	0.928988	0.947664	0.143187
TUCP_002489	XLOC_062509	0.715093	0.394297	1.08229	0.248341	0.519197	0.631306	0.657957	0.714378	0.532705	0.987715	0.930414	1.00173
TUCP_002853	XLOC_069756	0.608126	0.833548	0.328231	0.691576	0.352062	0.305959	0.413363	0.478968	0.672154	0.576479	0.525508	0.584562
TUCP_005505	XLOC_131054	0.859948	0.202171	0.097726	0.260599	0.421335	0.484033	0.094332	0.347196	0.322511	0.229185	0.286897	0.250703
TUCP_005201	XLOC_124047	0	0.081234	0	0.875589	0	0.01996	0.384921	0.008899	0.078849	0.867763	0.268136	0.057423
TUCP_003013	XLOC_073956	0.401905	0.394556	0.405852	0.634077	0.362603	0.44107	0.343147	0.418067	0.473718	0.526497	0.427122	0.589767
TUCP_005359	XLOC_127665	0.734498	1.02571	0.907047	1.17795	0.738017	0.69402	0.450129	0.708766	1.0883	1.29029	1.1266	1.20048
TUCP_003173	XLOC_077111	0.478019	0.73998	0.447393	0.601384	0.41322	0.34681	0.404631	0.364326	0.636413	0.617013	0.410319	0.513214
TUCP_000326	XLOC_010386	0.597818	0.830742	0.549467	0.547868	0.421747	0.463971	0.458515	0.517721	0.711336	0.612548	0.745424	0.737866
TUCP_002926	XLOC_071657	0	0.501117	0	0	0.054294	0	0	0	0	0	0	0
TUCP_005566	XLOC_132745	0.745069	0.812818	0.627283	0.764183	0.437828	0.315875	0.371594	0.377075	0.771093	0.637263	0.619248	0.609684
TUCP_001667	XLOC_043677	0.585804	0.464131	0.568265	0.488468	0.491433	0.416577	0.470118	0.459912	0.727952	0.734894	0.882219	0.715729
TUCP_000694	XLOC_019222	2.23537	2.88646	0.35317	2.14776	2.72585	2.56541	2.60688	2.17037	3.62948	3.50532	4.25306	4.07086
TUCP_004534	XLOC_108978	0.430315	0.427937	0.590124	0.608216	0.474219	0.28406	0.426546	0.358491	0.692422	0.855148	0.721365	0.684499
TUCP_003022	XLOC_074363	0.202406	0.395597	0.708628	0.787254	0.48244	0.346056	0.456503	0	0.618782	0.949292	0.749798	0.72646
TUCP_002807	XLOC_068587	0.47907	0.466201	0.317221	0.485302	0.314997	0.298053	0.28593	0.341161	0.322649	0.240321	0.201059	0.224058
TUCP_003842	XLOC_095446	0.400051	0.520158	0.505767	0.436489	0.386497	0	0.368939	0	0	0	0.290716	0
TUCP_002115	XLOC_053767	0	0.202493	1.02795	0.123998	0.155681	0.509788	0.450411	0.440839	0.4094	0.98893	0	0
TUCP_000248	XLOC_007362	0.163833	0.120773	0.034877	0.12469	0.120016	0.127367	0.122329	0.231809	0.581664	0.374541	0.212726	0.172859
TUCP_005620	XLOC_134326	0.631196	1.98685	0.34835	0.542755	0.556844	1.10855	0.341727	1.04591	1.50441	0.362348	0.325156	0.187749
TUCP_000938	XLOC_023016	0.707661	1.01523	0.413723	0.883293	0.776953	0.126507	0	0.499539	0.409965	1.26201	1.25003	0.215904
TUCP_004077	XLOC_099912	1.06126	1.06408	0.601478	0.676364	1.06467	1.03687	0.710235	0.963356	1.29005	1.55245	1.58611	1.68011
TUCP_001646	XLOC_043278	14.1982	15.5191	19.3719	20.6619	14.2169	12.5181	13.3059	14.6976	23.6401	22.958	21.3831	22.2029
TUCP_002619	XLOC_065428	0	0	0.003463	0	0	0	0.000771	0.63058	0	0	0	0
TUCP_003189	XLOC_077382	0.715036	0.953679	1.45951	1.18324	0.907968	0.809587	0.820946	0.767388	1.4038	0	1.58868	1.60313
TUCP_001857	XLOC_047345	1.91858	1.04027	0.915631	2.51678	1.03694	2.35171	2.28982	0.921684	3.04705	1.02537	0.934503	0.637633
TUCP_004269	XLOC_103301	0.655801	0.757804	0.663281	1.37187	0.778625	0.487991	0.551972	0.658493	0.811261	1.15037	0.804611	0.778051
TUCP_005236	XLOC_125457	0.394795	0.396538	0.28209	0.406994	0.316581	0.366919	0.474622	0.439063	0.000774	0.182713	0.375902	0.007686
TUCP_001707	XLOC_045253	2.95193	0.64707	0.645757	2.38375	0.382505	0.572969	0.887951	0.535917	1.04133	3.64263	3.15809	1.3896
TUCP_002752	XLOC_067471	2.43594	2.3222	2.57447	2.53994	2.00192	1.8071	1.57082	1.72661	2.95855	3.64676	3.16504	3.24896
TUCP_000601	XLOC_017080	2.64272	2.53249	1.94945	3.48945	2.72163	1.9139	2.59945	0	3.56575	4.33316	2.13593	2.64528
TUCP_003960	XLOC_097418	2.61559	2.70532	2.36614	2.16743	2.71266	1.4344	1.13657	2.41501	3.03171	2.65851	2.77554	3.17237
TUCP_005765	XLOC_138136	0.059387	0.086266	0.061753	0.054898	0.230016	0.051191	0.087188	0.243934	0.592155	0.186763	0.192566	0.196674
TUCP_002824	XLOC_069018	0.461922	0.41686	0.718977	0.432123	0.333362	0.407824	0.295069	0.468999	0.768825	0.987818	1.0394	0.626394
TUCP_005485	XLOC_130676	0.091954	0.193914	0.249905	0.183712	0.15348	0.134247	0.141826	0.040474	0.204939	0.096839	0.244417	0.312283
TUCP_000099	XLOC_003308	0.519579	0	0.007607	0.002854	0	0	0.036086	0	0.05715	0.040185	0.048916	1.22613
TUCP_001276	XLOC_031461	0.358069	0.063383	0.104109	0.260482	0.087911	0.027616	0.256309	0	0	0.063306	0.09544	0.188426
TUCP_003757	XLOC_093405	0.909521	0.901805	0.968427	0.841596	0.873923	0.732372	0.648927	0.838011	1.12866	1.23574	1.29904	1.11697
TUCP_005149	XLOC_122933	0	0.806665	0	0.538547	0.508779	0.521533	0.599598	0.439644	0.530575	1.05068	0.976354	0
TUCP_005839	XLOC_140363	0.020961	0.13598	0.050654	0.036609	0	0.023091	0.021154	0.031325	0.050868	0	0	0.045933
TUCP_003292	XLOC_079373	0.32941	0.262104	0.304489	0.405322	0.316427	0.172226	0.166883	0.275409	0.457415	0.59285	0.195298	0.331356
TUCP_003608	XLOC_091063	0.275125	0.834872	0.808036	0.879607	0.665471	0.5407	0.572058	0.653565	1.16182	1.03349	1.05938	0.912034
TUCP_003520	XLOC_087686	1.09881	0.782106	0.382069	0.783359	0.439915	0.438911	0.529177	0.371392	1.09339	0.8198	1.11465	0.463438
TUCP_001827	XLOC_047071	0.83211	1.027	0.741288	0.954708	0.81934	0.610163	0.685268	0.737205	1.06425	1.10163	1.13218	1.14873
TUCP_004058	XLOC_099795	0.569169	0.821219	0.317734	0.516128	0.662649	0.54072	0.555526	0.615858	0.814243	0.214715	0.614569	0.258594
TUCP_000814	XLOC_020568	0	0.387936	0	0	0.419464	0	0	0.595232	0.658147	0.025273	0.61672	0.032484
TUCP_003002	XLOC_073825	0.541283	0.783946	0.57529	0.88284	0.598382	0.509376	0.38321	0.593341	0.443362	0.708702	0.96776	0.924484
TUCP_003641	XLOC_091599	0.300897	0.567826	0	0	0	0	0	0	0.131691	0.419106	0	0
TUCP_004062	XLOC_099828	0.668118	0.209512	0.113816	0.204566	0.189709	0.320529	0.118951	0.133974	0.151498	0.207022	0.090164	0.095707
TUCP_005288	XLOC_126348	0.300207	0.556426	0.453518	0.953435	0.39947	0.291874	0.342351	0.300552	0.553797	0.600143	0.587665	0.521132
TUCP_000061	XLOC_001981	6.81017	1.50605	0.913978	1.3492	1.45013	0.425865	1.00541	1.05035	1.25093	1.29629	1.73978	2.33899
TUCP_004902	XLOC_117351	0	0.483824	0	9.5e-05	0	0.273901	0	0	0.199292	0	0.419417	0.381914
TUCP_005604	XLOC_133811	0.461291	0.196972	0.35119	0.333232	0.432419	0.467374	0.296901	0.210826	0.474502	1.00735	0.823022	0.526667
TUCP_001071	XLOC_024640	0	0	0.000327	0	0	0.037947	0	0	0.807357	0	0	0
TUCP_004713	XLOC_113238	0.353807	0.469917	0.032975	0.235871	0.133891	0.209985	0.016604	0.306685	0.230408	0.450235	0.304169	0.002032
TUCP_005058	XLOC_120841	0.877901	1.98531	1.24786	2.41117	1.58838	1.03009	1.42925	1.54701	1.59945	1.73884	1.62107	1.80316
TUCP_005803	XLOC_139437	0.534653	0.700638	0	0.813568	0	0.43145	0	0.215755	0.082269	0.499421	0.547896	0
TUCP_005270	XLOC_125935	0.604109	0.085246	0.300199	0.176047	0.1156	0.177114	0.188088	0.079653	0.10777	0.232652	0.159725	0.263244
TUCP_003289	XLOC_079364	0.808027	0.226655	0.246238	0.448075	0.388314	0.206587	0.70504	0	0.131009	0.346196	0.352965	0.249067
TUCP_005025	XLOC_120180	0.544075	0.690368	0.458341	1.36916	0.476379	0.280431	0.38834	0.444119	0.363976	0.808738	0.295082	0.659382
TUCP_002203	XLOC_055906	0.424755	0.353975	0.567399	0.526087	0.404039	0.388254	0.327247	0.466921	0.468899	0.398349	0.628394	0.590949
TUCP_003774	XLOC_093617	0.125275	0.259235	0.290991	0.431842	0.131301	0.230219	0.204453	0.213991	0.2804	0.319606	0.329019	0.339387
TUCP_002675	XLOC_066488	0.29132	1.06284	0.468231	0.771913	0.283353	0.774102	0	0.091696	0.53413	0.72049	0.249565	0
TUCP_002227	XLOC_056450	0.881703	0.666004	0.59495	0.730988	0.499006	0.453463	0.618576	0.665126	0.685216	0.794578	0.811482	0.75911
TUCP_002111	XLOC_053576	0.127421	0.066958	0.145978	0.477986	0.312662	0.141574	0.135308	0.203425	0.340154	0.138901	0.189827	0.130563
TUCP_003697	XLOC_092224	0.373395	1.27142	0.521	0	0	0	0.024321	0	0.179704	0.132679	0.623251	0.150667
TUCP_000324	XLOC_010330	0.189676	0.206229	0.352232	0.018931	0.139881	0.343513	0.407078	0.349724	0.011707	0.488259	0.249942	0.013176
TUCP_003057	XLOC_075192	0.610158	0.559554	0.314254	0.017043	0.423611	0.329922	0.309418	0.366004	0.445466	0.5457	0.406392	0.493943
TUCP_001616	XLOC_042413	0.673952	0.410531	0.574315	0.423119	0.463086	0.360921	0.503401	0.469925	0.485694	0.6595	0.602539	0.576998
TUCP_001727	XLOC_045908	0.342996	0.638891	0.462923	0.406093	0.399673	0.238447	0.340171	0.467182	0.671517	0.576633	0.451644	0.456522
TUCP_000175	XLOC_005010	2.84383	2.33399	2.6864	2.46639	1.51697	1.8926	1.64372	1.8081	2.92977	1.48117	3.37016	3.08092
TUCP_000404	XLOC_012429	0.22213	0.447999	0.229542	0	0.089438	0.195314	0.141944	0.175961	0.208702	0	0.203029	0.165912
TUCP_001056	XLOC_024431	0.383001	0.24322	0.443484	0.399492	0.352806	0.332444	0.231721	0.284846	0.519514	0.506031	0.765408	0.429488
TUCP_005049	XLOC_120522	0.347596	0.603938	0.313136	0.548775	0.326554	0.252712	0.298182	0.473362	0.644041	0.537099	0.845187	0.636592
TUCP_001407	XLOC_036589	0.033093	0.054471	0.040829	0.105247	0.020345	0.031131	0.051398	0.020908	0.033804	0.068991	0.130053	1.17557
TUCP_001183	XLOC_028927	0.666158	0.623558	0.384404	0.749197	0.696336	0.491208	0.770792	0.659088	0.837029	0.774439	0.724933	0.582451
TUCP_001883	XLOC_048333	0.404994	0.449515	0.369999	0.376068	0.273846	0.455909	0.24663	0.258328	0.641615	0.4787	0.320396	0.399371
TUCP_000871	XLOC_021278	11.1673	9.97374	11.3692	8.24002	7.64408	7.50422	5.63394	6.66003	7.92715	15.8941	8.78643	14.2089
TUCP_003621	XLOC_091257	0.327757	0.25975	0.164677	0.339385	0.17083	0.216362	0.225267	0.194704	0.223092	0.432323	0.603143	0.368927
TUCP_002209	XLOC_055990	0.256866	0.211689	0.288489	0.17076	0.30971	0.165049	0.203394	0.418846	0.438637	0.450664	0.331257	0.412352
TUCP_005174	XLOC_123707	0.16338	0.105619	0.291985	0.382255	0.174328	0.048801	0.213552	0.168632	0.128892	0.197458	0.142519	0.243317
TUCP_004809	XLOC_115844	0.323118	0.322376	0.27998	0.513328	0.296095	0.206563	0.082849	0.053461	0.642243	0.365496	0.491114	0.095086
TUCP_004189	XLOC_101613	0.73979	1.76623	1.65722	2.11802	1.18724	1.54632	1.30901	1.56531	1.9454	1.98973	1.80469	1.61967
TUCP_002176	XLOC_055499	0.159229	0	0.398074	0.285538	0.210946	0	0.257821	0.506672	0.298637	0.354386	0.619634	0
TUCP_002334	XLOC_058348	0.224593	0.839894	0.676909	0.959683	0.630848	0.535247	0.45109	0.653966	0.715289	0.985897	0.778354	0.949365
TUCP_002842	XLOC_069660	0.46303	0.475854	0.473803	0.632191	0.38793	0.441504	0.396364	0.48381	0.569622	0.684563	0.497836	0.595592
TUCP_005767	XLOC_138146	0	0.557355	0.595999	0.286477	0.204247	0.460136	0.927205	0.583853	0.199548	0.064268	0.133312	0.439459
TUCP_002415	XLOC_059792	0.41023	0.415348	0.371044	0.130477	0.479224	0.357079	0.287053	0.297177	0.348279	0.323456	0.203247	0.329439
TUCP_001734	XLOC_045977	0.439681	0.522609	0.500325	0.564175	0.365681	0.228155	0.476207	0.175651	0.672782	0.6139	0.897824	0.772327
TUCP_002167	XLOC_055182	0.725792	0.617419	0.531969	0.718113	0.476922	0.461835	0.536086	0.458672	0.715591	1.06199	0.92409	0.677669
TUCP_000091	XLOC_002805	0	0.474138	0	0.484795	0.549724	0	0	0.331414	0	0.674991	0.033413	0.669274
TUCP_003667	XLOC_091758	0.121193	0	0.092024	0.064023	0.030828	0.023507	0	0	0.180396	0.286045	0.147717	0.087755
TUCP_004988	XLOC_119478	0.116752	0.864929	0.141329	0.165712	0.824814	0.280076	0.152122	0.226852	0.126676	0.349042	0.22026	0.57836
TUCP_000504	XLOC_015279	0.477904	0.37818	0.448037	0.373959	0.519426	0.511821	0.441155	0.556297	0.516756	0.414119	0.521114	0.44519
TUCP_005701	XLOC_136388	0.136946	1.33256	0	1.5752	1.14007	0.864474	0.914376	0	1.17004	1.65872	1.16876	1.12893
TUCP_003073	XLOC_075263	0.142668	0.207696	0.377132	0.165449	0.035527	0.043044	0.118188	0.198885	0.154465	0.303066	0.32956	0.312488
TUCP_001969	XLOC_050289	0.669461	1.07952	0.878223	1.12068	0.619765	0.422275	0.692232	0.730328	1.22695	1.28858	1.18154	0.968813
TUCP_004090	XLOC_100149	0.430595	0.245522	0.256584	0.167196	0.202147	0.117276	0.288925	0.238811	0.312963	0.369594	0.506361	0.274525
TUCP_002147	XLOC_054791	0	0	0	0	0	0.172411	0	0	0	0	0.220332	0
TUCP_003984	XLOC_097873	4.02555	3.37789	4.06884	3.419	3.35885	2.89847	2.9182	2.94321	4.46538	4.54539	4.30986	4.12468
TUCP_004609	XLOC_111076	0.350997	0.623126	0.6258	0.542675	0.375712	0.470368	0.496275	0.467363	0.734646	0.514531	0.987238	0.849332
TUCP_003306	XLOC_080573	0.020616	0.532322	0.104831	0.134523	0.383354	0.080349	0.194556	0.218083	0.098581	0.236287	0.123457	0.150973
TUCP_004757	XLOC_114140	0.691029	0.209047	0.409074	0.448372	0.275847	0.556643	0.421984	0.130925	0.418951	0.607841	0.456242	0.268545
TUCP_002055	XLOC_052039	0.477424	0.627937	0.544388	0.847933	0.302825	0.448501	0.41192	0.364284	0.766779	0.789346	0.596292	0.57134
TUCP_002713	XLOC_066988	0.152057	0.46703	0.287646	0.37711	0.26136	0.187904	0.189111	0.329017	0.276353	0.444984	0.188082	0.414873
TUCP_001246	XLOC_030899	2.25912	2.76156	2.35422	0.895345	1.88426	2.47715	1.85204	2.67794	3.23027	2.70085	3.41087	2.90686
TUCP_000479	XLOC_015066	0.171236	0.137102	0.29492	0.30381	0.340748	0.215609	0.290794	0.347256	0.48461	0.383888	0.540016	0.363339
TUCP_002027	XLOC_051336	0.821609	0.280062	0.304784	0.471384	0.374814	0.607504	0.548618	0.36493	0.532826	0.590798	0.864013	0.730684
TUCP_002509	XLOC_062909	0.501368	0.488432	0.281019	0.518173	0.350351	0.28251	0.310954	0.34305	0.317681	0.455605	0.366462	0.318741
TUCP_000277	XLOC_008385	0.49673	0.832998	0.670699	0.93531	0.567636	0.476672	0.580047	0.574408	0.80465	0.937287	0.920541	0.936312
TUCP_003357	XLOC_082010	1.21219	0.652493	0.67412	0.553026	1.60729	0.243769	0.633817	1.38777	1.75419	1.31854	1.88912	1.08292
TUCP_003344	XLOC_081906	0.711417	0.963236	1.05321	0.227367	0.678699	0.621134	0.507394	0	1.10469	0.932795	1.54221	0.9849
TUCP_005229	XLOC_124707	0.725076	0.348948	0.519273	0.313417	0.497734	0.263191	0.493339	0.431843	0.547052	0.388614	0.248676	0.390723
TUCP_004624	XLOC_111464	0.165441	0	0.197016	0.30601	0.088127	0.551608	0.335957	0.083383	0.170508	0.199947	0.351517	0
TUCP_000838	XLOC_020985	0.522457	0	0.607022	0.268405	0.398143	0.470535	0.197267	0.561131	0.659139	0.045058	1.8827	0.988427
TUCP_001591	XLOC_041552	0	0.018826	0.048399	0.010828	0	0	0	0.01463	0.055838	0.017199	0.708797	0.008054
TUCP_002171	XLOC_055321	1.22626	1.35614	1.85179	1.57209	1.53789	1.23777	1.36771	1.42379	1.39414	1.22246	1.53065	1.62452
TUCP_005577	XLOC_132879	18.4594	15.8239	17.8917	15.1603	15.7754	12.1353	11.2836	14.123	21.757	24.2187	23.6099	21.3088
TUCP_005504	XLOC_131034	0.478456	0.304636	0.244873	0.68522	0.235519	0.358432	0.289344	0.169822	0.319802	0.461315	0.417329	0.616342
TUCP_002292	XLOC_057504	0.044552	0.557815	0.441937	0.672154	0.345778	0.385463	0.41069	0.216576	0.189457	0.556955	0	0.56989
TUCP_005367	XLOC_127955	4.48111	4.51913	4.38038	2.73795	3.18421	2.85518	2.95761	3.30883	3.81086	5.05553	4.47505	5.34137
TUCP_005496	XLOC_130770	0.297314	0.015755	0.144249	0.090483	0	0.06437	0.017287	0.012985	0.449524	0.607016	0	0.294686
TUCP_004264	XLOC_103232	0.306176	0.085515	0.169498	0.266237	0.130878	0.119332	0.38947	0.071875	0.292443	0.343939	0.244064	0.341191
TUCP_005144	XLOC_122795	2.27664	2.02465	1.94778	2.03257	2.38882	1.58802	1.70629	1.76168	2.95446	2.94746	2.60531	2.81593
TUCP_003861	XLOC_095650	0.012274	0.241211	0.055218	0.019186	0.20927	0.019408	0.542457	0	0.113707	0.050279	0.014616	0.015039
TUCP_001974	XLOC_050301	0.356119	0.050277	1.38735	0.083353	0.100604	0.330768	1.08677	0.046699	0.668059	0.953671	0	0.571882
TUCP_001409	XLOC_036624	1.00609	0.847193	0.813847	0.967316	0.801884	0.972165	0.989207	0.73208	1.08294	0.89754	1.43936	0.968543
TUCP_004492	XLOC_107763	0.772337	0.418716	0.256042	0.24554	0.207607	0.262638	0.123355	0.160183	0.213286	0.040668	0.05579	0.210991
TUCP_000718	XLOC_019555	0.242685	0.484521	0.298964	0.579531	0.310808	0.222025	0.320119	0.326601	0.453222	0.447875	0.143433	0.441278
TUCP_003460	XLOC_086313	0.418985	0.357691	0.1806	0.147516	0.194217	0.346644	0.178694	0.290048	0.609617	0.286092	0.150565	0.36266
TUCP_000418	XLOC_013165	0.646195	0.03743	0	0	0	0	0	0	0	0.071716	0	0.018566
TUCP_005240	XLOC_125545	0.444121	0.425794	0.430237	0.400446	0.384053	0.274747	0.279179	0.220139	0.513794	0.67523	0.642239	0.583528
TUCP_000066	XLOC_002005	0.404653	0.40718	0.454407	0.689118	0.408277	0.243957	0.428468	0.416153	0.612428	0.737917	1.0061	0.679203
TUCP_000681	XLOC_019070	1.22532	0.998284	1.53215	1.36789	0.901513	0.888076	0.783207	0.894546	1.46915	0.592349	1.63587	1.67871
TUCP_004259	XLOC_103113	1.06286	0.523771	0.842582	0.591826	1.00743	0.877221	0.829887	1.00893	0.867115	0.930048	0.85198	0.931091
TUCP_004185	XLOC_101567	0.653265	0.45343	0.33477	0.084747	0.395495	0.61313	0.678435	0.47327	0.568163	0.449111	0.040622	0.589997
TUCP_002614	XLOC_065318	0.425659	0.328561	0.349047	0.41738	0.385838	0.363545	0.299262	0.241757	0.415267	0.491713	0.614677	0.547483
TUCP_000775	XLOC_020300	0.174716	0.195651	0.056525	0.142666	0.021464	0.770867	0.008541	0.01162	0.040868	0.024902	0.073197	0.015198
TUCP_004616	XLOC_111167	0.44333	0.71194	0.772739	0.71435	0.523648	0.529388	0.350313	0.568173	0.727757	1.02043	0.938412	0.005077
TUCP_004413	XLOC_106175	0.757318	0.880715	0.954761	0.856356	0.778823	0.664815	0.664915	0.594548	0.904608	1.23332	0.885836	1.08318
TUCP_001698	XLOC_044807	0.299325	0.577449	0.138345	0.187272	0.340601	0.093928	0.15061	0.180572	0.229982	0.290385	0.154821	0.224373
TUCP_000857	XLOC_021126	0.348171	0.502319	0.661311	0.654964	0.604341	0.486624	0.397915	0.475102	0.657607	0.771969	0.72533	0.810399
TUCP_002740	XLOC_067377	0.064005	0.150634	0	0.373594	0	0.054547	0.205301	0.044908	0.111497	0.382197	0.070068	0.168555
TUCP_001961	XLOC_050197	0.75099	2.47656	0.808915	0.84207	1.19955	0.636514	1.25615	1.30804	1.18984	1.65684	1.63603	1.40658
TUCP_004466	XLOC_107280	0.513609	0.396067	0.479786	0.340981	0.444617	0.33986	0.389204	0.284862	0.493435	0.690226	0.566216	0.766547
TUCP_005181	XLOC_123768	3.09689	0.462323	0.482558	0.61487	0.51001	0.21156	0.426404	0.420092	0.687748	0.573946	0.453971	0.589981
TUCP_001311	XLOC_032966	0.005541	0.544951	0.268474	0.188283	0.120365	0.184199	0.043814	0.327989	0.130764	0.837883	0.473814	0.030024
TUCP_003452	XLOC_085922	0.403898	0.609931	0.513126	0.251375	0.441519	0.197338	0.246727	0.305639	0.452458	0.363808	0.456126	0.209225
TUCP_004948	XLOC_118154	0.028738	0.101571	0	0	0	0	0.072517	0	0.296806	0.048551	0	0
TUCP_004224	XLOC_102527	1.35413	0.71901	1.78129	0.650647	0.529918	0.526496	0.282241	0.768407	1.61369	0.992748	1.52189	1.43477
TUCP_000462	XLOC_014390	0.135479	0.128851	0.086657	0.2216	0.194254	0.077925	0.2124	0.251012	0.109746	0.600144	0.369361	0.381347
TUCP_005487	XLOC_130711	0.503094	0.794167	0.62425	0.725224	0.412609	0.447615	0.486319	0.430014	0.72645	0.65816	0.547248	0.690296
TUCP_005564	XLOC_132720	0	7.39915	0	0.002587	6.35495	4.96283	0	0	0	0	8.81774	9.26111
TUCP_001429	XLOC_037287	0.79155	0	0	0	0	0	0.014838	0	0	0.015482	0	0
TUCP_004575	XLOC_110042	3.06056	2.70134	3.05277	2.54496	2.66827	1.86759	2.09443	2.30851	2.96315	4.28967	3.32046	3.52058
TUCP_004955	XLOC_118390	2.11188	1.61338	2.27288	2.69842	2.61821	1.59746	0.796761	1.65491	2.601	2.61252	1.50903	1.58682
TUCP_004644	XLOC_111922	1.15436	0.086196	0.93763	1.70385	0.376898	0.771147	0	0	0.045084	0.118295	1.55504	0.003359
TUCP_004079	XLOC_099914	0.166403	0.04104	0.01723	0.871288	0.136063	0.184076	0.442101	0.214263	0.111546	0	0.546718	0.039139
TUCP_000508	XLOC_015398	0.701503	0.817262	0.835273	0.778863	0.723847	0.90619	0.713659	0.549083	1.08126	1.03876	0.964361	0.708078
TUCP_004652	XLOC_111996	0.112008	0.26573	0.207538	0.308612	0.184341	0.126721	0.198362	0.254615	0.422539	0.425504	0.415481	0.259603
TUCP_005841	XLOC_140398	0.369774	0.516124	0.543499	0.784234	0.341716	0.378541	0.42616	0.295934	0.633043	0.639973	0.663252	0.613044
TUCP_001619	XLOC_042656	0	0.232944	0	0.513917	0.208586	0	0.084348	0	0.197309	0.269258	0	0
TUCP_000962	XLOC_023398	0.258589	1.32217	0.810772	0.699153	0.768602	0.799405	0.645754	1.25231	1.17834	1.97661	0.502243	1.03251
TUCP_003052	XLOC_075140	0.233693	0.267845	0.338599	0.362688	0.345792	0.275685	0.467381	0.304103	0.44086	0.581391	0.396393	0.378699
TUCP_005394	XLOC_128803	1.83214	1.89345	2.08443	2.19558	0.769681	1.62353	1.78885	1.44193	2.52894	3.1595	2.97975	2.82381
TUCP_000235	XLOC_007155	0	0	0	1.07782	0	0	0	0	0	0	0	0
TUCP_003868	XLOC_095677	1.31083	1.36883	1.32971	1.73184	1.13048	0.925512	0.916335	1.10875	1.58815	1.65661	1.31594	1.67854
TUCP_005018	XLOC_120159	0.796617	1.28131	1.1435	1.22205	0.947826	0.740555	0.704913	0.654801	1.13261	1.49532	1.12392	0.537775
TUCP_000547	XLOC_015810	0.905505	0.754005	0.717444	1.01797	0.755626	0.485718	0.571287	0.42106	1.04218	1.06155	1.23373	0.896208
TUCP_004244	XLOC_102870	0.419549	0.831434	0.502128	0.662654	0.643409	0.535565	1.28017	0.6351	0.4783	0.764537	0.547234	0.814072
TUCP_004814	XLOC_115955	0.492357	0.093499	0.067506	0.053187	0.414171	0.03181	0.263151	0.559434	0.414595	0.184144	0.191977	0.768164
TUCP_000269	XLOC_008175	1.01519	0.939763	1.08608	1.12688	0.896283	0.84825	0.918506	1.10009	1.43555	1.56033	1.41968	1.46987
TUCP_005179	XLOC_123757	1.86882	1.4692	1.85577	1.98708	1.13044	1.03833	1.37177	1.72661	2.24307	2.17919	3.2987	2.09771
TUCP_005342	XLOC_127240	0	0.326081	0.068623	0	0.183431	0.120183	0.094086	0.065369	0.203989	0.011586	0.212341	0
TUCP_004120	XLOC_100473	0.293103	0	0.69255	0	0	0	0.241283	0.250772	0	0.796044	0.454711	0.588844
TUCP_003297	XLOC_079400	0.815034	0.410352	0.576215	0.411506	0.76522	0.502983	0.089613	0.716973	0.691482	0.388234	0.396463	0.511018
TUCP_005789	XLOC_138925	4.29964	4.19814	4.61163	4.87147	4.2699	3.38967	3.69947	3.9014	5.87692	6.06112	6.02312	5.93405
TUCP_004236	XLOC_102698	0.248099	0.227134	0.112239	0.238028	0.024952	0.242166	0.255074	0.161214	0.105609	0.555437	0.469265	0.410437
TUCP_001470	XLOC_038849	2.80153	0	0	2.2933	1.95313	0	0	0.024741	8.69988	0	7.04402	6.4283
TUCP_002987	XLOC_073546	1.13948	1.56252	1.42785	1.27633	1.55403	0.933845	0.836784	0.654512	0.949742	1.31035	2.30087	1.42833
TUCP_000620	XLOC_017311	1.0033	1.22223	1.05902	1.16264	0.890496	0.741374	0.803651	0.930092	1.29107	1.24225	1.29159	1.10661
TUCP_003793	XLOC_094089	7.55028	6.28015	6.9648	4.90034	5.65508	5.58739	5.07646	4.43355	6.67204	8.74428	8.02432	7.5098
TUCP_005590	XLOC_133133	0.24282	0.29925	0.360128	0.266348	0.208451	0.239595	0.141695	0.144547	0.231266	0.386314	0.322165	0.435308
TUCP_004525	XLOC_108713	0.740208	0.848987	0.716211	0.890253	0.626888	0.543333	0.571604	0.577744	0.800063	0.818214	0.872556	0.869544
TUCP_000803	XLOC_020416	0.26044	0.529494	1.95415	0.395551	0.312976	0.566822	1.54194	0.253493	1.32201	2.27406	0.206272	2.16423
TUCP_005376	XLOC_128418	0.156669	0.212542	0	0.601633	0.090795	0.122019	0	0	0	0	0.3152	0.282434
TUCP_004238	XLOC_102711	0.534206	0.306279	0.413184	0.47985	0.250383	0.204481	0	0.249731	0.47729	0.343189	0.42459	0.456706
TUCP_002998	XLOC_073813	0.440156	0.55075	0.752238	0.509409	0.473841	0.377982	0.243572	0.141334	0.226092	0.699601	0.772752	0.529049
TUCP_004705	XLOC_112789	0.526806	0.486598	0.741006	0.426875	0.498333	0.649429	0.373409	0.311624	0.524484	0.34127	0.721162	0.423983
TUCP_000568	XLOC_016214	0.360211	0.858181	0.641647	0.658671	0.818548	0.688789	0.384417	0.469747	1.06557	0.847905	0.902824	0.813646
TUCP_004169	XLOC_101415	0.484081	0.114218	0.188498	0.656622	0.199865	0.363908	0.129257	0.145899	0.41616	0.307412	0.336788	0.388744
TUCP_001804	XLOC_046782	0.538506	0.504659	0.580507	0.498773	0.551681	0.227137	0.327565	0.399947	0.39265	0.750377	0.570369	0.632286
TUCP_000726	XLOC_019738	0.224739	0.300128	0.408939	0.415805	0.517522	0.207009	0.220478	0.32301	0.355904	0.360227	0.419465	0.32319
TUCP_002622	XLOC_065465	0.6597	0.643238	0.436451	0.388867	0.347788	0.334786	0.492432	0.39876	0.511399	0.652749	0.56201	0.538315
TUCP_001618	XLOC_042656	1.294	0.606822	0.115456	0.065331	0.468828	0.087033	0	0.113491	0.835758	0.822366	1.35245	1.36135
TUCP_004951	XLOC_118167	1.98156	1.92579	0.717849	1.3796	0.914555	1.17264	1.27211	1.18372	0.418838	1.14815	1.0881	0
TUCP_002627	XLOC_065494	4.57858	1.3121	1.3596	1.07434	0.537192	3.27108	1.02159	1.14112	2.40293	2.55882	5.03206	2.31487
TUCP_004796	XLOC_115743	1.43528	1.98321	1.53871	1.80687	1.24047	1.37467	1.43659	1.4628	2.04585	2.21598	2.19865	2.03481
TUCP_005434	XLOC_129386	0.940005	0.21917	0.212268	0.325898	0.165136	0.140487	0.236834	0.256499	0.285587	0.209976	0.196377	0.334812
TUCP_000710	XLOC_019385	1.14716	0	0.01549	0.038066	0	0.486856	0	0.379923	0.314779	0	0.029086	0.329943
TUCP_005794	XLOC_139063	6.30233	5.03622	6.54975	4.72728	5.07593	4.8204	3.73885	4.48295	6.3761	8.34414	8.29548	7.31258
TUCP_002989	XLOC_073577	0.992619	3.53558	3.20935	3.5415	3.01771	1.61089	2.64782	2.67591	4.59506	5.29807	4.45116	5.2667
TUCP_002831	XLOC_069300	0.135443	0.387179	0.340927	0.819204	0.127144	0.162088	0.115936	0.118845	0.980286	0.669169	0.536798	0.570665
TUCP_004568	XLOC_109913	0.038593	0.992852	0.807441	0.525541	0.791902	0.580377	0.496473	0.671536	0.589721	0.642144	0.476313	0.656074
TUCP_003499	XLOC_086901	0.668473	0.909932	1.03753	1.02763	0.765516	0.504613	0.592333	0.443491	0.71079	0.793202	0.854494	0.90307
TUCP_001932	XLOC_049668	0.363934	0.205443	0.164843	0.188829	0.150916	0.289986	0.082439	0.086196	0.996939	0.44563	0.363716	0.666631
TUCP_003953	XLOC_096923	0.254485	0.521875	0.412926	0.361339	0	0.172542	0	0	0	0.451819	0.289487	0.579096
TUCP_005199	XLOC_123904	0.201379	0.266012	0.335108	0.297567	0.25779	0.281774	0.345229	0.270538	0.518016	0.601378	0.31834	0.438665
TUCP_002333	XLOC_058335	0.772463	0.808015	0.834872	0.770658	0.611336	0.636926	0.665414	0.638899	0.837368	1.24624	1.04477	1.27291
TUCP_004436	XLOC_106561	1.98785	1.24571	1.72797	1.0575	1.47071	1.36189	1.06203	1.25529	2.39019	2.6926	1.33831	2.52738
TUCP_000624	XLOC_017364	0.296975	0.628504	0.481731	0.428264	0.184478	0.499305	0.462894	0.462387	0.70215	0.476528	0.220895	0.478069
TUCP_004138	XLOC_100607	0.497319	0.475309	0.43865	0.478394	0.46897	0.520969	0.397735	0.462323	0.471809	0.47455	0.27219	0.485808
TUCP_002101	XLOC_053140	0.2515	0.34639	0.377518	0.635798	0.241572	0.289329	0.251395	0.23328	0.486712	0.270598	0.381425	0.365879
TUCP_003473	XLOC_086431	0.784528	0	0.016248	0.015881	0.355732	0.639077	0	0.23871	0	0	0.21317	0
TUCP_004103	XLOC_100284	0.369125	0.251659	0.336802	0.354168	0.07633	0.301904	0.203928	0.274098	0.450659	0.278204	0.521301	0.453264
TUCP_003904	XLOC_096155	0.45474	0.6892	1.27895	1.32957	0.460046	0.597042	1.1013	0.542664	0.709813	1.79934	2.33486	0.924856
TUCP_000285	XLOC_008442	0.520145	0.820475	0.758204	0.849155	0.709752	0.480496	0.531074	0.708652	0.756363	1.18689	0.981543	0.812909
TUCP_004991	XLOC_119656	0.995532	0.693629	0.996865	0.734899	0.813957	0.545684	0.621472	0.690822	0.807415	0.984792	1.09896	1.12559
TUCP_005353	XLOC_127637	2.53205	2.146	2.29756	2.46463	1.93321	1.75172	2.07881	2.18068	2.82734	2.75813	3.13094	3.32493
TUCP_002289	XLOC_057485	28.8792	36.527	56.2343	25.2571	47.8239	41.8987	39.0485	38.5298	54.5064	66.3398	69.7374	64.2117
TUCP_003069	XLOC_075245	0.146699	0.702999	0.529842	0.820878	0.09202	0.452657	0.067264	0.538504	1.32303	0.755655	0.411597	0.819649
TUCP_000008	XLOC_000254	0.937267	0.856408	0.372006	0	0.125235	0.867777	0.457624	0.625071	0.674155	1.30161	1.05335	0.881613
TUCP_001800	XLOC_046754	0	0	0	0	0	0.469163	0	0	0	0	0	0
TUCP_005120	XLOC_122285	2.25461	2.31454	2.89155	2.07502	0.862116	1.90027	1.61968	1.13812	3.01339	3.07931	1.36613	3.21449
TUCP_004166	XLOC_101322	0.056501	0.303088	0.262584	0.1461	0.262708	0.307288	0.263296	0.211349	0.291512	0.31943	0.196544	0.424051
TUCP_005831	XLOC_140059	0.419521	0.460211	0.3051	0.548875	0.323543	0.256677	0.299859	0.306926	0.474941	0.521877	0.490468	0.495428
TUCP_000596	XLOC_017048	1.16143	1.08437	1.10155	0.916001	0.923989	0.816131	0.700676	0.836322	0.983247	1.29378	1.2047	1.37579
TUCP_001009	XLOC_023950	0.337629	0.157522	0.415099	0.159295	0.091993	0.17793	0.269025	0.18403	0.428478	0.6204	0.245644	0.539243
TUCP_005202	XLOC_124047	0.32786	0.648074	0.58149	0.180331	0.368054	0.395053	0.051333	0.376862	0.524115	0.097082	0.282219	0.519721
TUCP_002867	XLOC_069995	2.93029	2.1831	2.1125	2.65572	1.52612	1.13265	0.837974	1.05636	1.58971	1.23247	2.12208	1.73131
TUCP_004857	XLOC_116785	0	1.09101	0	1e-06	0.069897	0.042529	0.089521	0.006917	0.006059	0.197564	0.011272	0.108747
TUCP_000290	XLOC_008790	1.35274	1.44389	1.01569	0.554434	0	0.006097	0.977736	0.021393	0.718495	0	0	1.40648
TUCP_005348	XLOC_127497	0.369913	0	0	0	0	0	0	0	0	0.001562	0	0
TUCP_002676	XLOC_066517	1.53319	0.351669	0.805513	0.668957	0.372895	0.483067	0.399807	0.702083	0.75367	0.606228	0.374557	0.728817
TUCP_003674	XLOC_091828	0.320253	0.24505	0.245552	0.348679	0	0.18403	0.152317	0	0.28761	0.084317	0.198287	0.083748
TUCP_001058	XLOC_024446	0.983509	0.808243	0.981156	0.783189	0.693799	0.608365	0.649845	0.757768	0.850563	0.906454	0.981576	0.880334
TUCP_005129	XLOC_122383	1.08908	2.5674	2.49414	1.5845	2.73922	1.70399	2.28053	2.1419	2.92199	3.83939	1.10088	1.86322
TUCP_001036	XLOC_024142	13.7717	25.9701	26.4668	23.0344	21.7977	20.2203	19.2951	19.664	32.2575	32.1803	32.6615	29.704
TUCP_002765	XLOC_067797	0.068483	0.023417	0.445437	0.732838	0.31777	0.084437	0.027235	0.6068	0.509389	0.886028	0.130063	0.030526
TUCP_001401	XLOC_036444	0.403412	0.532014	0.760199	0.520513	0.289901	0.322408	0.409305	0.344101	0.654647	0.777452	0.58105	0.748286
TUCP_001812	XLOC_046823	0.149483	0.216732	0.278053	0.257467	0.232059	0.043882	0	0.38322	0	0.126109	0.047685	0.137682
TUCP_004798	XLOC_115745	0	0	0	0	0.699499	0	0	0	0	0	0	0
TUCP_003364	XLOC_082125	3.91784	3.3343	4.58654	3.2442	2.73462	3.36639	2.97815	2.87937	4.57007	5.3728	5.62225	4.65994
TUCP_004329	XLOC_103952	0.386432	3.76745	4.61665	0.143636	5.51751	4.22454	0.960982	1.33748	5.327	0.010122	3.86154	3.91811
TUCP_000939	XLOC_023063	0.119548	0.367666	0.149037	0.34791	0.261944	0.156638	0.167476	0.106256	0.297599	0.163983	0.178764	0.250456
TUCP_002562	XLOC_064381	0.858092	0.495077	0.432905	0.688471	0.719828	0.735665	0.642888	0.703322	0.500223	0.984663	0.912508	0.606062
TUCP_003298	XLOC_079442	0.762393	0.549085	0.622804	0.684287	0.551789	0.376492	0.550069	0.563095	0.683208	0.888956	0.796528	0.521286
TUCP_005041	XLOC_120390	0	0	0	0	0	0	0	0	0	0.444534	0	0
TUCP_001819	XLOC_046986	0.631974	0.746758	0.411039	0.698638	0.6076	0.624086	0.569694	0.758448	1.10073	0.485534	0.874598	0.381282
TUCP_003393	XLOC_083172	0.089194	0.091853	0.094717	0.286841	0.08422	0.21214	0.117579	0.110768	0.380487	0.230449	0	0
TUCP_002505	XLOC_062834	0.972034	1.40264	1.60866	1.62071	1.36642	1.13139	0.942582	1.17309	1.73577	1.52811	1.48437	1.95158
TUCP_005451	XLOC_129942	1.11223	0.651557	0.717608	0.772853	0.589098	0.466532	0.411709	0.488773	0.795748	1.00027	0.913734	1.05912
TUCP_005017	XLOC_120122	0	0	0	0	0	0	0.178488	0	0	2.56937	0	0
TUCP_000610	XLOC_017208	0.343535	0.084893	0.55513	0.211087	0.087687	0.057685	0.272797	0.446353	0.625314	0.816873	0.389765	0.520166
TUCP_004845	XLOC_116512	0.759288	0.923331	0.661334	1.19414	0.75021	0.657167	0.282249	0.763562	0.540339	0.428301	1.08706	0.667345
TUCP_004417	XLOC_106212	0.951163	1.24859	0.945853	1.16538	0.765295	0.719167	0.676478	1.01014	0.876193	1.08663	0.884259	1.53045
TUCP_000657	XLOC_018545	0.411522	0.592688	0.493926	0.41164	0.492899	0.533762	0.544538	0.332981	0.632985	0.849351	0.412196	0.614795
TUCP_002945	XLOC_072270	0.790263	0.868446	0.73622	0.242988	0.62227	0.403451	0.320695	0.661199	0.888819	0.595689	0.504024	0.394482
TUCP_005300	XLOC_126608	0.387178	0.002323	0.693593	0.084107	0.274321	0.509412	0.596444	0.366584	0.067329	0.264987	0.442407	0.951372
TUCP_000744	XLOC_019967	0	0.0039	0	0.009317	0.00872	0.002528	0.002124	0.540236	0.007299	2.31879	0.000216	0.002712
TUCP_003634	XLOC_091525	0.959713	1.00993	1.1727	1.0873	0.926301	0.780153	0.81062	0.893816	0.670838	1.37284	1.12856	1.25102
TUCP_004348	XLOC_104185	0	0	0.238981	0.529414	0.105137	0	0	0	0.157486	0.243577	0.499233	0.001529
TUCP_002716	XLOC_067029	0.636959	0.348524	0.356586	0.65647	0.34205	0.770208	0.893033	0.506966	0.6071	1.04145	1.04082	1.34759
TUCP_002032	XLOC_051381	0.382127	2.17355	0.214709	0.618623	0.473439	0.058093	0.12638	0.165517	0.252736	1.53088	0.69946	0.171148
TUCP_005171	XLOC_123588	0.819126	0.877168	0.844498	1.32928	0.870836	0.639484	0.87334	0.7767	1.16617	1.19473	0.882129	1.07117
TUCP_002275	XLOC_057214	0.368054	0.626201	0.3809	0.326942	0.369727	0.434167	0.307545	0.358728	0.349652	0.440511	0.409896	0.370073
TUCP_001640	XLOC_043008	1.95994	0	2.90964	0	0	0	0	0	0.024301	0	0.261485	0
TUCP_003223	XLOC_078170	1.75257	1.34709	0.866643	1.11272	1.2429	1.00507	0.827858	0.983665	0.980701	0.854026	0.899981	0.752587
TUCP_005672	XLOC_135452	1.43392	1.14879	0.973835	0.907837	0.892334	0.569841	0.592511	0.732955	1.43921	1.37993	1.13456	0.698716
TUCP_005707	XLOC_136400	0.273032	0.072198	0.046995	0.103128	0.112461	0.06416	0.102882	0.082455	0.118683	0.07758	0.068757	0.050491
TUCP_003725	XLOC_092423	7.39019	6.23642	5.66106	5.10434	4.75202	5.06049	4.40485	4.95948	6.36272	7.40074	7.20445	7.1918
TUCP_002391	XLOC_059456	1.95867	2.2592	2.35395	2.14732	2.04359	1.86801	1.52255	1.96433	2.5808	2.65988	2.50781	2.57165
TUCP_005478	XLOC_130512	0.857007	0.644638	0.688554	0.54177	0.639753	0.699597	0.482482	0.66322	1.13812	0.739038	0.559928	0.67785
TUCP_005318	XLOC_126728	0.044106	0.424546	0.113239	0.443792	0.521922	0.044822	0.043771	0.025196	0.032253	0.032767	0.056789	0.087485
TUCP_003213	XLOC_077804	19.9693	22.0353	25.5039	21.3612	21.1873	18.1515	17.318	18.2978	26.2971	30.9208	30.7679	27.2388
TUCP_000229	XLOC_007014	0	0	0	0	0	0.300002	0	0	0	0	0	0
TUCP_001051	XLOC_024396	1.00589	1.22079	1.06076	2.03976	0.888812	0.890949	0.750005	0.985283	1.27203	1.43046	1.33225	1.11618
TUCP_000076	XLOC_002393	0.480877	0	0.248402	0.014958	0	0	0	0	0	0.479753	0	0
TUCP_003141	XLOC_076264	0.941305	1.1017	1.19916	0.994231	0.773863	0.739561	1.0021	0.928566	1.27429	1.31223	1.24694	1.01417
TUCP_000632	XLOC_017587	0.455922	0.653295	0.454905	0.451465	0.479024	0.342513	0.385048	0.376327	0.716965	0.692121	0.678643	0.574379
TUCP_002877	XLOC_070044	0.755046	1.36218	0.895828	1.52914	0.800411	0.723314	0.634618	0.857554	1.24336	1.33219	1.04462	1.19949
TUCP_003075	XLOC_075339	1.86556	2.20053	0.809541	2.84199	1.20102	1.38791	1.58764	1.8238	2.42829	2.28241	2.33574	1.68544
TUCP_002052	XLOC_051925	1.34871	2.60577	2.42432	1.73393	1.96116	2.17148	1.96101	2.13919	2.80701	2.67313	2.33362	2.23907
TUCP_001759	XLOC_046468	0.878668	1.49623	1.97349	2.02544	1.07506	0.494929	0.685872	1.37403	1.28964	1.62049	1.09845	2.06592
TUCP_000792	XLOC_020398	0.423029	0.425255	0.028409	0.046865	0.205962	0.318352	0.045016	0.175694	0.64469	0.329049	0.276867	0.192894
TUCP_002066	XLOC_052603	0.25157	0.698816	0.416476	0.440284	0.224076	0.34811	0.303551	0.37313	0.305729	0.480057	0.311599	0.451691
TUCP_002053	XLOC_051961	0.43959	0.535126	0.478897	0.750631	0.604078	0.492006	0.478556	0.604341	0.807689	1.10602	0.683122	0.857808
TUCP_001981	XLOC_050355	0.354675	0.277844	0.000443	0.035127	0.013641	0.410454	0.280158	0.248551	0.456444	0.367596	0.088234	0.12813
TUCP_004531	XLOC_108903	0.280745	0.616698	0.531217	0.725225	0.577945	0.474029	0.560494	0.648189	0.557074	0.329349	0.496441	0.416495
TUCP_002654	XLOC_065921	0	0	0.256529	0	0.372128	0.114781	0	0.368071	0.523748	0.217272	0.026576	0.411089
TUCP_002491	XLOC_062510	0	0	0	0.073684	0	0.134712	0	0	0	0	0.314075	0
TUCP_000461	XLOC_014319	0.158567	0.255151	0.414306	0.246916	0.962675	0.723627	0.298043	0.028318	0.337035	0.85816	0.407931	0.279764
TUCP_002502	XLOC_062799	0.249437	0	0.113225	0.115893	0.077801	0.342959	0.226933	0.19497	0.083741	0.266052	0	0.405663
TUCP_000979	XLOC_023624	1.37782	1.46755	1.39474	2.34175	1.47184	1.26273	1.26375	1.3156	2.24604	2.29921	2.01012	2.11052
TUCP_003231	XLOC_078420	1.32689	0.934088	1.03616	0.676911	0.875013	0.248983	0.667642	0.601768	0.339522	0.245048	1.07123	1.07018
TUCP_001100	XLOC_025121	5.35407	2.58542	2.48487	5.98978	2.00347	2.1292	2.9181	2.09918	3.80943	5.75931	4.25735	5.00497
TUCP_001975	XLOC_050301	0.767051	2.11878	0.461187	2.75625	1.79634	1.05916	0.485969	1.45339	1.6468	1.93297	1.66575	1.66361
TUCP_003751	XLOC_093061	1.14845	0.368863	0.242006	0.082601	0.229298	0.175642	0.161181	0.066787	0.203813	0.194313	0.112046	0.233619
TUCP_002623	XLOC_065484	1.76762	2.37924	1.89918	2.61235	1.94651	1.47599	1.41953	1.711	2.28903	2.82455	2.21127	2.41713
TUCP_001049	XLOC_024311	0.370905	1.57341	1.47968	2.07139	1.17363	1.15039	1.09589	1.30695	1.97946	1.76731	1.55227	1.78987
TUCP_003154	XLOC_076682	0.176522	0.319861	0.367266	0.012696	0.132442	0	0.388369	0.349022	0.36218	0.310168	0.180733	0.280788
TUCP_003856	XLOC_095610	1.12522	1.74282	1.34957	0.971707	1.33305	0.85971	1.16219	1.05625	1.31922	1.76422	1.84842	1.54628
TUCP_004836	XLOC_116349	0.257624	0.108656	0.244984	0.363703	0.098285	0.100409	0.19095	0.134563	0.183689	0.242009	0.334455	0.187019
TUCP_003354	XLOC_082005	0.549276	0.636976	0.460946	0.610639	0.40981	0.397707	0.42277	0.398163	0.716836	0.714087	0.647765	0.757699
TUCP_003949	XLOC_096920	2.18974	2.53284	2.22641	2.00423	1.92249	1.44517	1.34787	1.58731	2.31577	2.62317	2.4275	2.6467
TUCP_003418	XLOC_083977	0.513831	0.375998	0.609448	0.387073	0.468167	0.429619	0.231108	0.371551	0.525212	0.678082	0.709973	0.559325
TUCP_001242	XLOC_030870	0	0.007642	0.533622	2.21157	0.072218	0.71556	0.058994	0.023737	1.39464	0.665665	0.476056	0.585083
TUCP_001852	XLOC_047275	0.448583	1.03446	0.535801	1.71323	0.590666	0.526343	0.584234	0.519387	0.834507	0.498822	0.570046	0.712395
TUCP_003768	XLOC_093559	0.77484	1.02744	1.1155	0.489704	1.52098	0.90883	0.533386	0.428039	1.13379	0.731455	0.574806	1.7456
TUCP_000164	XLOC_004560	0.036802	0.015058	0	1.38912	0.053906	0.008174	0	0	0.006651	0.010345	0.02784	0.048395
TUCP_000688	XLOC_019198	0.494318	0.353605	0.32316	0.409066	0.589314	0.485927	0.402472	0.491866	0.442017	0.364754	0.449401	0.430007
TUCP_004005	XLOC_098523	0.433026	0.299738	0.276693	0.214214	0.248124	0.195315	0.182162	0.395811	0.537455	0.415213	0.283294	0.116955
TUCP_002087	XLOC_053111	0.511894	0.446807	0.721124	0.543533	0.470263	0.48087	0.400958	0.383797	0.541921	0.880955	0.733758	0.659072
TUCP_000336	XLOC_010971	0.344507	0.302306	0.18241	0.093771	0.160822	0.111893	0	0.151638	0.130976	0.181405	0.05734	0.300101
TUCP_005879	XLOC_141435	0.593743	0	0.659095	0.082962	0.816004	0.300786	0.216114	0.119803	0.05668	0.211878	0.437443	0.088416
TUCP_005581	XLOC_132905	0.549153	0.888331	0.550697	0.599587	0.482798	0.595855	0.46401	0.485624	0.598673	0.736604	0.629429	0.604762
TUCP_002475	XLOC_061900	0.284571	0.217032	0.21099	0.377214	0.277507	0.168469	0.24004	0.231227	0.312252	0.447092	0.5067	0.31692
TUCP_001901	XLOC_049263	0.183038	0.335896	0.197531	0.349271	0.279223	0.570914	0.281479	0.149655	0.222469	0.2251	0.305054	0.369196
TUCP_001950	XLOC_049904	0	0	0.353979	0	0	0	0.305829	0.127742	0.84741	0.61322	0.409301	0
TUCP_000228	XLOC_007014	0.910946	0	0.072626	0.07546	0.097834	0.000472	0	0	0	0.035526	0	0
TUCP_004847	XLOC_116512	0.756132	1.34878	0.922577	1.56252	0.95629	1.09838	0.547853	0.98146	1.15859	1.43925	1.44703	1.60069
TUCP_000241	XLOC_007211	0.686344	0.483837	0.677317	0.322637	0.577296	0.443694	0.41722	0.407752	0.537741	0.854463	0.657168	0.635165
TUCP_000409	XLOC_012626	0.057329	0.178726	0.304293	0.096307	0.193479	0.228841	0.105567	0.077865	0.514685	0.173682	0.485872	0.605473
TUCP_004441	XLOC_106636	0.311423	0.226294	0.321619	0.237674	0.453771	0	0.222619	0.150513	1.16826	0.735699	0.344337	0.451575
TUCP_000671	XLOC_018949	0.488062	0.347042	0.528502	0.636403	0.45754	0.273799	0.331433	0.501749	0.685726	1.02571	0.691168	0.923923
TUCP_000896	XLOC_021983	0.122804	0.665642	0.197177	0	0.629116	1.20009	0.798562	1.10541	0.852787	0	0.526002	0.571906
TUCP_003218	XLOC_077962	0.327316	0.521131	0.691718	0.810773	0.258802	0.174502	0.17845	0.517815	0.482623	0.71187	1.0818	0.413223
TUCP_000027	XLOC_000735	0	0.103368	0	0	0.548221	0.241996	0	0	0.02737	0.061086	0.027575	0
TUCP_005551	XLOC_132506	0.158758	0.158468	0	0	0.302836	0	0.247357	0.101698	0.370935	0.334385	0.30255	0.083032
TUCP_001478	XLOC_038876	0.0096	0.025984	0.06044	0.75611	0.012114	0.024046	0.003905	0.012228	0.69534	0.055494	0.017416	0.029565
TUCP_004856	XLOC_116785	0	0	1.43814	2.53934	1.26912	0	0.910705	0.024353	0.028535	1.63356	0.027173	0
TUCP_004341	XLOC_104145	0.340334	0.352869	0.147308	0.309225	0.284286	0.126056	0.163861	0.198715	0.402408	0.273501	0.483932	0.252541
TUCP_001093	XLOC_025016	0.343372	2.16079	1.62829	2.46101	1.41996	1.6595	1.31308	1.32634	2.01256	2.24675	2.16428	2.07893
TUCP_005156	XLOC_123309	0	0	0	0	0	0	0	0	0	0	0.286322	0
TUCP_000160	XLOC_004560	0.726944	0.339009	0.736761	1.10292	0.458733	0.539686	0.64041	0.412382	0.877145	0.959422	0.834385	0.865863
TUCP_005678	XLOC_135859	0.395995	0.279812	0.18541	0.313032	0.231004	0.187674	0.258492	0.194375	0.277691	0.326414	0.28491	0.323439
TUCP_005055	XLOC_120821	0	0	0	0	0	0	0	0	0	0	0	0
TUCP_005507	XLOC_131055	0	0	0	0	0	0	0	0.107404	0	0.538758	0.007682	0.312457
TUCP_002212	XLOC_056073	1.66159	2.24429	2.05394	2.76332	2.0313	1.55322	1.36838	1.59961	2.83073	2.80068	2.45184	2.36856
TUCP_000074	XLOC_002372	0.69184	0	0.188578	0.011305	0	0.078015	0.121751	0	0.103611	0	0	0.067179
TUCP_004497	XLOC_108102	0.060286	0.109561	0.140101	0.481187	0.089722	0.10877	0.157036	0.061757	0.287988	0.287935	0.169186	0.258466
TUCP_000949	XLOC_023322	2.49598	5.15913	3.8132	7.11172	3.65631	2.91282	2.84909	3.05582	4.1837	5.37952	4.03591	4.73184
TUCP_000412	XLOC_012722	0.189724	0.384479	0.487563	0.378137	0.239173	0.191289	0.248627	0.289064	0.411793	0.545952	0.365628	0.287942
TUCP_002910	XLOC_071327	0.513433	0.728334	0.593731	0.861939	0.561719	0.375576	0.469514	0.48074	0.717558	0.595024	0.614296	0.624155
TUCP_002577	XLOC_064664	0	0	0	0	0	0.001987	0	0	0.518975	0.036894	0.318065	0.026105
TUCP_002091	XLOC_053130	0.939425	0.748723	0.161572	0.958407	1.35359	3.98073	3.44436	0.131996	5.71067	7.00236	0.344155	0.043713
TUCP_004479	XLOC_107436	0.267618	0.238847	0.239973	0.275529	0.288201	0.180538	0.201549	0.162928	0	0	0	0
TUCP_000989	XLOC_023712	6.26869	3.22544	2.19974	4.31401	0.295305	4.31701	1.26334	0.646695	0.802852	1.48719	6.29864	1.41612
TUCP_000016	XLOC_000270	1.18668	11.4996	1.85733	1.79225	1.72937	36.8425	18.7742	26.9109	5.90589	11.0314	3.53184	38.4221
TUCP_004649	XLOC_111940	0.319336	0.670993	0.265824	0.749327	0.337242	0.420312	0.358441	0.352069	0.580862	0.381651	0.396399	0.52649
TUCP_001440	XLOC_037610	0.025674	0.357648	0.461792	0.254542	0.298137	0.472326	0	0.528868	0	0.173252	0.159738	0.054808
TUCP_003193	XLOC_077393	1.45702	3.16524	2.52105	2.73582	2.89545	2.06057	1.64611	2.01434	2.50126	2.90903	2.29639	3.11485
TUCP_002427	XLOC_060087	0.02739	0.355412	0.601745	0.59586	0.277477	0.237351	0.387591	0.098325	0.260195	0.732165	0.538065	0.66207
TUCP_000567	XLOC_016196	0.242124	1.91936	2.50313	2.3122	2.07645	1.51728	1.45579	2.13478	0.255533	0.977724	0.31731	0.230392
TUCP_004266	XLOC_103270	0.261416	0.747453	0.75915	1.1049	0.660083	0.501097	0.692135	0.577364	1.10936	1.09145	1.19038	1.35455
TUCP_005110	XLOC_122265	0.777728	0.597813	0.605889	0.621444	0.442854	0.462917	0.495611	0.459064	0.75283	0.810082	0.865265	0.814951
TUCP_002722	XLOC_067100	0	1.03144	0.250734	0.826819	0.24979	0.001328	0.135555	0.362527	1.44471	0.022038	0.781004	0
TUCP_002875	XLOC_070023	0.183038	0.621346	0.555749	0.58745	0.232358	0.215856	0.507452	0.179601	0.527924	0.66701	0.597223	0.581684
TUCP_004905	XLOC_117370	0.144354	0.389042	0.079588	0.79746	0.504342	0.669101	0.64246	0.195858	0.121796	0.660352	0.648746	1.88284
TUCP_002739	XLOC_067376	0	0.237393	0.051683	0.385736	0.065573	0	0	0.065923	0.047149	0.18882	0.244033	0.025997
TUCP_003251	XLOC_078652	0	0	0	0	0	0	0	0	0.618228	0	0	0
TUCP_005195	XLOC_123893	0.700931	0	0.603865	0.303182	0.124239	0	0.024908	0.000643	0	0.013259	0	0.605132
TUCP_003050	XLOC_075085	0.303999	0.34132	0.225912	0.761904	0.207533	0.417919	0.373934	0.213586	0.363612	0.422885	0.695063	0.354137
TUCP_003713	XLOC_092280	0.759345	0.639621	0.693054	1.06517	0.572269	0.589821	0.58215	0.510554	0.87579	0.893157	0.715055	0.791239
TUCP_002832	XLOC_069300	0.542899	0.37285	0.65057	0.005024	0.619963	0.403155	0.563599	0.516236	0	0.53647	0.670062	0.446545
TUCP_002463	XLOC_061479	0.695853	0.312499	0.514139	0.584484	0.55936	0.36499	0.536604	0.392599	0.661084	0.732972	0.469174	0.66301
TUCP_002381	XLOC_059174	0.521932	0.611998	0.51294	0.523121	0.565966	0.395536	0.443155	0.448961	0.693542	0.801182	0.576423	0.548204
TUCP_002800	XLOC_068562	0.01583	0.202441	0.054499	0.091059	0	0.28367	0	0.194236	0.213636	0.466598	0.211875	0.053383
TUCP_005813	XLOC_139744	0.874738	0.673971	0.823703	1.46948	0.794967	0.635282	0.553549	0.901728	1.27715	1.32718	0.97161	0.761953
TUCP_001142	XLOC_027747	0.670283	0.749655	0.732116	0.645725	0.51587	0.567093	0.546039	0.536238	0.615657	0.524762	0.526591	0.58241
TUCP_002048	XLOC_051767	0.730368	0.438918	0.659461	0.404633	0.380301	0.309656	0.499314	0.576982	0.60018	0.944754	0.821044	0.603775
TUCP_004806	XLOC_115817	0.8706	0.927154	0	0.809626	0.75971	0	0	0.743234	1.6853	1.17215	0.433465	0
TUCP_001572	XLOC_041141	0.481301	0.564162	0.497819	0.665048	0.491249	0.518917	0.531236	0.447672	0.578905	0.538851	0.591939	0.466354
TUCP_002682	XLOC_066525	0	0	0	0	0	0	0	0	0.384376	0.015053	0	0
TUCP_003986	XLOC_097908	0.301073	0.264407	0.175323	0.862921	0.114868	0.446488	0.384422	0.387492	0.351514	0.918374	0.670401	0.765328
TUCP_002612	XLOC_065179	0.153006	1.10649	0.999022	1.47024	0.835572	0.714821	1.0089	0.790338	1.19553	1.31068	0.901914	1.12939
TUCP_005705	XLOC_136399	0.404128	0.369136	0.452374	0.438552	0.355519	0.125094	0.304311	0.381114	0.446106	0.63161	0.425486	0.471602
TUCP_001706	XLOC_045253	1.80714	3.20685	4.83815	1.60665	3.19796	2.49574	2.84769	2.53937	4.96382	3.02364	3.6742	5.68953
TUCP_002647	XLOC_065772	1.54134	1.18977	1.48233	1.39832	1.31889	0.956768	0.976895	1.24385	1.68234	1.65081	1.68194	1.58906
TUCP_003403	XLOC_083544	0.923889	0.377523	0.006924	0.481776	0.726456	0.348105	0.181225	0.257839	0.236957	0.38933	0.548846	0.245307
TUCP_004827	XLOC_116303	0.119481	0.381374	0.726162	1.10833	0.502864	0.52326	0.47432	0.715928	1.16399	0.692658	0.605377	0.34587
TUCP_000194	XLOC_006097	0	0.263032	0.257438	0.641498	0.374004	0	0.543683	0	0	0.468515	1.10724	0
TUCP_001566	XLOC_041069	0.241903	0.190442	0.781914	0.384467	0	0.2645	0.501027	0.348745	0	0.565965	0.247428	0
TUCP_004290	XLOC_103431	0.196506	0.688667	0.47405	0.951464	0.521061	0.324253	0.446107	0.522772	0.655615	0.840476	0.60813	0.694224
TUCP_000294	XLOC_009178	0.638688	0.341021	0.154099	0.275463	0.167024	0.267171	0.23626	0.193467	0.214963	0.311333	0.155773	0.41502
TUCP_001820	XLOC_046986	0	0	0.221787	0.400874	0	0	0	0	0	0.556821	0	0.388139
TUCP_002392	XLOC_059465	0.601838	0.821487	0.976276	0.919058	0.845168	0.732591	0.591103	0.685709	0.980348	1.1204	1.00442	0.953949
TUCP_005358	XLOC_127657	0.135769	0.585468	0.133339	0.014452	0.119466	0.021537	0.202081	0.312674	0.126017	0.195032	0	0.19392
TUCP_004327	XLOC_103951	0.279638	0.438389	0.607887	0.359958	0.328432	0.344991	0.308525	0.198367	0.398628	0.520638	0.499972	0.667301
TUCP_003762	XLOC_093507	0.258869	0.806902	0.433064	0.883508	0.567749	0.403235	0.081071	0.152058	0.364832	0.990153	0.393643	0.5548
TUCP_004641	XLOC_111919	1.20403	3.12067	3.069	3.70515	2.62192	2.18055	1.99159	2.73718	2.53649	3.41456	3.40704	3.18215
TUCP_000999	XLOC_023815	0.239071	0	0.101642	0	0.122062	0	0	0.151259	0	0.374383	0	0
TUCP_000257	XLOC_008094	0.099127	1.17381	0.394761	0.373146	0.752298	0.634023	0.406747	0.816496	0.333356	0.637333	0.205088	0.453705
TUCP_000969	XLOC_023449	0.39994	0.3129	0.574716	0.446793	0.452815	0.30906	0.285057	0.412272	0.592747	0.627763	0.70091	0.398789
TUCP_004110	XLOC_100331	0.42409	0.754316	0.862977	0.698641	0.557758	0.56823	0.484846	0.705344	0.862198	1.24959	1.05362	0.873098
TUCP_005354	XLOC_127637	0	0	0.009168	0	0	0	0.0062	0	0.790993	0	0	0.000639
TUCP_001271	XLOC_031326	0.808672	1.39178	1.35854	2.15851	1.04056	1.09863	1.11023	1.35201	1.76812	2.43402	1.99434	1.9843
TUCP_001154	XLOC_028041	1.95285	0.950908	1.77994	0.802909	1.52771	1.37611	0.867858	1.27867	1.36728	1.64816	1.95226	1.75209
TUCP_002099	XLOC_053140	0.160405	0.3367	0.278815	0.5489	0.141956	0.175309	0.130024	0.189482	0.557428	0.556628	0.345239	0.265852
TUCP_003936	XLOC_096773	0.894939	0.954509	0.728195	1.02408	0.934262	0.789522	0.704439	0.786854	1.0682	0.873594	1.38779	0.961847
TUCP_005481	XLOC_130545	0.4171	0.641705	0.467508	0.403682	0.338148	0.480523	0.154114	0.553811	0.481536	0.486962	0.331105	0.454514
TUCP_005634	XLOC_134499	0.281668	0.222737	0.228889	0.815857	0.164558	0.478926	0.542031	1.20133	0.36316	0.21649	0.243464	0.276836
TUCP_000488	XLOC_015097	0.603857	0.589283	1.45844	1.07472	0.279734	0.870305	0.772302	0.825656	1.13544	1.16284	0.401975	1.62565
TUCP_000630	XLOC_017556	0.861793	1.05859	1.12787	1.33634	0.904198	0.881815	0.958937	0.87195	1.27522	1.42785	1.37563	1.36515
TUCP_005113	XLOC_122273	0.721604	1.12398	1.5199	1.40134	0.808442	0.904341	0.816913	0.809327	1.31602	1.4149	1.22814	0.554691
TUCP_003675	XLOC_091829	0.146847	0.253884	0.05629	0.244294	0.274497	0.222856	0.338271	0.207773	0.310023	0.214192	0.211213	0.441915
TUCP_004430	XLOC_106434	0.236902	0.290067	0.209005	0.746678	0.301882	0.061014	0.263936	0	0.434205	0.43394	0	0.395662
TUCP_000902	XLOC_022433	0.43762	0.348203	0.316673	0.40052	0.258451	0.406002	0.420874	0.331065	0.340161	0.288439	0.36232	0.362317
TUCP_000325	XLOC_010338	1.19533	0.602741	0.970456	0.680863	0.787109	0.632569	0.571848	0.587568	0.816854	1.07424	0.837893	0.680017
TUCP_003170	XLOC_077038	0.225018	0	0	0.019939	0	0	0	0	0	0	0	0
TUCP_000261	XLOC_008109	0.109575	1.58793	0.499032	0.465982	1.12136	0.840764	0.571771	1.09817	0.463974	0.80145	0.265754	0.64109
TUCP_005447	XLOC_129715	0	0	0	0	0	0	0	1.87292	0.962894	0	2.32781	0
TUCP_005147	XLOC_122919	1.05906	0.258739	0.243871	0.478665	0.14927	0.198646	0.260504	0.221565	0.303144	0.284555	0.351811	0.366216
TUCP_002846	XLOC_069697	0	0.43646	0	0.428062	0	0.207315	0.15629	0	0.685082	0.415676	0.182638	0.862931
TUCP_004059	XLOC_099795	0	0.011554	0.417424	0.325017	0.005749	0.011483	0	0	0	0.860941	0.008253	0.570495
TUCP_002358	XLOC_058768	0.545039	0.442523	0.427153	0.319892	0.246333	0.354915	0.213234	0.265179	0.429391	0.429711	0.358117	0.552297
TUCP_005777	XLOC_138482	0.582484	0.422157	0.621637	0.130518	0.118451	0.359275	0.095206	0.373021	0.335784	0.606153	0.301097	0.399804
TUCP_002464	XLOC_061504	1.17515	0.847661	1.27345	0.935292	1.04459	0.830893	0.878704	0.858697	1.18756	1.38172	1.49092	1.31135
TUCP_000045	XLOC_001189	1.01428	0.939851	0.603094	1.18158	0.597099	1.02761	0.834533	0.736562	1.45437	1.25124	0.886756	1.22597
TUCP_003665	XLOC_091751	1.71761	1.43105	1.64206	1.63887	1.4083	1.05347	1.41117	1.32163	1.93097	1.85224	2.68136	2.00596
TUCP_002473	XLOC_061843	0.529434	0.351269	0.5243	0.481157	0.243944	0.26969	0.288621	0.232643	0.477017	0.501895	0.392927	0.504562
TUCP_004602	XLOC_110945	3.18513	1.69118	1.84208	1.87445	1.40583	1.14502	1.561	1.25662	1.48624	1.94268	1.91595	1.99168
TUCP_004626	XLOC_111483	1.34592	1.03975	1.34814	0.993672	1.21913	0.935778	0.603836	1.06136	1.29212	1.54432	1.41766	1.63526
TUCP_003252	XLOC_078652	0.774135	0	0.965862	1.09188	0.866965	0.572153	0.762957	0.049777	0.0089	0	1.01347	0.689955
TUCP_002506	XLOC_062843	0.600666	0.546399	0.499171	0.574822	0.640697	0.453369	0.521229	0.457772	0.526218	0.55891	0.465692	0.569919
TUCP_005552	XLOC_132558	3.87627	2.25286	2.79838	1.70545	2.43921	1.85709	1.78938	2.08744	2.56523	3.35201	2.74617	2.85274
TUCP_002798	XLOC_068555	0.612779	0.615822	0.592952	0.490463	0.469118	0.610664	0.496098	0.081204	0.696254	0.492845	0.605556	0.634826
TUCP_000536	XLOC_015727	1.33124	1.38446	1.054	1.72791	1.10128	0.827278	0.889623	0.853262	1.46342	1.23074	1.30806	1.47918
TUCP_001644	XLOC_043238	0.079501	0.306636	0.124905	0.237508	0	0.086557	0.154324	0.037121	0.394975	0.171301	0.182649	0.088216
TUCP_005439	XLOC_129478	4.66035	2.29269	2.05329	2.50401	2.35154	2.01025	1.39381	2.06554	2.79079	2.76049	2.94063	2.80896
TUCP_003940	XLOC_096789	1.48211	0.198939	0.311671	0.369615	0.254374	0.180211	0.252943	0.231476	0.200314	0.37756	0.27285	0.343309
TUCP_002481	XLOC_062387	0	0.804201	0.300233	0.017291	0.139282	0.010554	0.055753	0.004055	0.349708	0.469283	0.003691	0.328872
TUCP_000276	XLOC_008376	0.320212	0.322443	0.353396	0.172452	0.32846	0.243254	0.319139	0.189846	0.509902	0.507338	0.257044	0.398141
TUCP_004127	XLOC_100520	2.55451	0	0	2.35337	0.402317	2.03723	0	1.69844	0	1.62648	0	4.18789
TUCP_000083	XLOC_002438	6.3958	0.069442	0.093934	2.71901	3.73254	0.008905	0.864538	0.017087	0.019287	2.58387	2.47871	0.775293
TUCP_004877	XLOC_117037	0.211558	0.373053	0.321387	0.360011	0.271521	0.205839	0.249554	0.240912	0.481609	0.37782	0.371216	0.423864
TUCP_002332	XLOC_058331	0.449126	0.041974	0.35081	0.063502	0.333484	0.340039	0.32217	0.2728	0.638455	0.46366	0.538291	0.524037
TUCP_005182	XLOC_123770	1.19113	0.781223	0.693318	2.02653	0.769287	0.678237	0.662423	0.71603	0.8968	1.15786	0.772841	0.758686
TUCP_001809	XLOC_046790	0.278954	0.420996	0.179989	0.519948	0.216458	0.197276	0.152528	0.244502	0.339139	0.337229	0.230237	0.341711
TUCP_005760	XLOC_137925	0	0	0	0	0	0	0	0	0	0	0	0.184922
TUCP_000845	XLOC_020992	0.336029	0.041397	0	0.56979	0.542429	0.048484	0	0	0	0	0	0.70184
TUCP_003580	XLOC_090089	1.80397	2.99385	2.88932	3.52741	3.22113	2.02603	2.09288	2.29661	3.55152	4.21374	3.93392	3.78438
TUCP_000421	XLOC_013213	0.34308	0.412353	0.394508	0.632109	0.339352	0.327823	0.5476	0.430522	0.615809	0.736244	0.498445	0.601793
TUCP_002599	XLOC_064973	0.139218	1.18653	1.69186	1.55546	0.965116	1.39621	1.39221	1.33204	2.27208	2.56397	2.62187	2.19559
TUCP_000706	XLOC_019311	4.66749	2.27661	2.57443	2.20784	1.76156	1.82064	1.72994	1.74291	2.6372	3.00035	2.7649	2.87935
TUCP_002454	XLOC_060883	0.553238	1.02639	0.918927	0.990367	1.04663	0.476433	0.601425	0.759102	0.857344	1.10626	1.02851	0.937694
TUCP_003945	XLOC_096881	0.42206	0.389181	0.452644	0.277094	0.475035	0.220895	0.266794	0.158899	0.58011	0.6081	0.54514	0.610914
TUCP_005511	XLOC_131338	0.118652	0.305369	0.195306	0.498912	0.169693	0.236924	0.246255	0.151161	0.385042	0.416421	0.400837	0.377093
TUCP_002264	XLOC_056886	0.542391	0.40681	0.405726	0.404531	0.249986	0.418144	0.379794	0.233127	0.438918	0.601746	0.521216	0.456618
TUCP_001752	XLOC_046450	0	0	0	0	0	0.571582	0	0	0	0	0	0
TUCP_003620	XLOC_091235	1.61974	2.19893	1.73402	2.90358	1.73655	1.45234	1.38465	1.48655	1.75505	2.40368	1.55458	1.95855
TUCP_003211	XLOC_077773	0.027919	0.02066	0.791953	0	0.004056	0.502303	0.012275	0	0	1.10332	0.790796	0.103757
TUCP_000514	XLOC_015552	0.341331	0.626546	0	0	0.363764	0.464439	0.539076	0.219997	0.403988	0.596515	0.443005	0.576853
TUCP_004073	XLOC_099888	0	0.00101	0	0.016004	0.15638	0.571755	0.067283	0	0.35813	0.005147	0	0.007636
TUCP_001318	XLOC_033185	0.233756	0.3464	0.077398	0.581048	0.124103	0.048723	0.09683	0.028603	0.173388	0.303397	0.334111	0
TUCP_000359	XLOC_012081	0.076551	0.564861	0.215181	0.211467	0.170261	0.036586	0.145695	0.134429	0.112585	0.232594	0.361782	0.254479
TUCP_004453	XLOC_106890	0.465952	0.287264	0.577878	0.728282	0.584249	0.33751	0.125841	0.483128	0.724594	0.562664	0.690844	0.787836
TUCP_001278	XLOC_031555	2.37801	2.32727	1.69281	0.952721	0.534913	0.785447	1.17384	1.79672	2.86186	2.4814	1.6566	0.771619
TUCP_002327	XLOC_058307	0.435024	0.4025	0	0.252321	0.257495	0	0.657945	0	0.968287	0	0.74597	0.54394
TUCP_004303	XLOC_103610	1.19049	0.966361	0.914182	0.92955	1.18529	0.989967	1.09213	1.00941	1.13732	1.5901	1.15226	1.17778
TUCP_005899	XLOC_142037	1.36184	0.47594	1.62853	0.658006	0	0.698055	0.428829	0.538173	1.07269	0.94597	0.028569	0.593632
TUCP_002504	XLOC_062818	0.156163	0.638779	0.086457	0.830406	0.491245	0.392393	0.427335	0.407332	0.708434	0.633159	0.589044	0.590204
TUCP_004532	XLOC_108906	0.794477	0.423519	0.71435	0.762007	0.916073	0.629397	0.370541	0.521161	0.389179	0.750563	0.712892	1.32235
TUCP_003484	XLOC_086648	0.598385	0.740593	0.768692	0.867082	0.615546	0.661522	0.573686	0.597152	0.689146	0.753785	0.808089	0.875052
TUCP_000777	XLOC_020300	0.949099	0	1.40806	1.13378	0.85211	0	0.598896	0.850883	0	0.83128	0.922784	0.546475
TUCP_003242	XLOC_078609	0.740785	1.29637	0.881837	0.78832	0.727563	0.722472	0.75737	0.800875	1.49998	1.839	1.47777	0.876527
TUCP_003426	XLOC_084372	1.31299	0.790608	0.723688	0.82316	0.910054	0.765199	0.913234	0.782854	0.714535	0.626108	0.830805	0.761462
TUCP_003094	XLOC_075408	0	0.039502	0.075764	0.050426	0	0	0	0	0.607628	0.787979	0	0.317539
TUCP_003451	XLOC_085903	0.131994	0.29085	0.449302	0.390361	0.3398	0.30337	0.434865	0.351154	0.262349	0.358423	0.310252	0.334607
TUCP_005265	XLOC_125690	0	0	0.004353	0	0.00778	0	0.003764	0.719674	0	1.08802	0.642766	0.437885
TUCP_005613	XLOC_134220	0.596707	0.586214	0.581307	0.979872	0.641163	0.447527	0.662144	0.50029	0.880399	0.850886	0.674194	0.722534
TUCP_003443	XLOC_085416	0.092471	0.302262	0.484511	0.442057	0.220214	0.251114	0.431029	0.275521	0.477435	0.538211	0.761364	0.634162
TUCP_002672	XLOC_066431	0	0	0.200827	0	0.273638	0	0	0.165923	0.112562	0.101618	0	0
TUCP_001770	XLOC_046500	0.282808	0.185291	0.327009	0	0.294195	0	0.096514	0.27403	0.181419	0.338562	0.241539	0.379865
TUCP_003711	XLOC_092279	0.423207	0.377775	0.265957	0.461481	0.289195	0.351487	0.398768	0.385809	0.529741	0.509211	0.40133	0.526955
TUCP_004821	XLOC_116223	4.94471	5.37233	5.53387	5.83065	5.38637	4.3328	4.28962	4.72849	6.18177	7.6902	6.69119	7.24177
TUCP_004342	XLOC_104156	1.80974	1.08849	1.2309	1.63875	0.872214	1.06956	0.646516	1.05184	1.8141	1.49199	2.01242	2.07206
TUCP_002680	XLOC_066525	0.480939	0.652952	0.487637	0.956838	0.716037	0.301957	0.821655	0.662964	1.10543	1.14545	1.2111	0.94898
TUCP_000499	XLOC_015188	0.745545	0.584011	0.383915	0.394356	0.460614	0.587455	0.504108	0.381894	0.678134	0.497897	0.587532	0.610692
TUCP_002477	XLOC_061982	0.364903	0.306161	0.181893	0.59486	0.1646	0.241188	0.149775	0.140748	0.285821	0.350879	0.321133	0.164873
TUCP_003445	XLOC_085542	0.46763	0	0	0.014723	0	0	0	0.00313	0.482726	0.00039	0.197307	0.20761
TUCP_003547	XLOC_088895	0.228752	0.470465	0.239583	0.35853	0.358973	0.399717	0.355236	0.45645	0.491923	0.444034	0.648467	0.525361
TUCP_003350	XLOC_081944	0	0.26887	0.331467	0.395688	0.241184	0.56738	0	0.264931	0.883595	0.956598	0	0.256395
TUCP_004989	XLOC_119628	0.514533	0	0.881798	0.156665	0.167816	0.028113	0.11895	0.634853	0.547254	0.689367	0.456857	0.754603
TUCP_005638	XLOC_134534	0.463514	0.032747	0.004911	0.023657	0	0.035661	0	0.243946	0.300816	0.394688	0.020287	0.257494
TUCP_000665	XLOC_018870	1.12073	0.497107	0.467119	0.729227	0.296004	0.366553	0.178959	0.401588	0.596808	0.621908	0.318728	0.810917
TUCP_005023	XLOC_120164	0.528418	0.692478	0.427406	0.275126	0.486371	0.267843	0.547376	0.604141	0.500731	0.437542	0.458275	0.718709
TUCP_002790	XLOC_068345	0	0.212267	0	0	0.047224	0.189606	0	0	0.190009	0	0.368161	0
TUCP_004161	XLOC_101205	0.535071	1.73719	0.925587	1.6119	1.21719	1.47163	2.21108	1.04257	2.12433	2.28956	2.6063	0.679955
TUCP_003948	XLOC_096913	0.735575	0	0	0.842495	0.676191	0	0	0	0.987302	0	0	0
TUCP_002104	XLOC_053376	0.548266	0.419219	0.368202	0.391358	0.375727	0.2672	0.444119	0.288482	0.448394	0.600949	0.437261	0.631871
TUCP_005556	XLOC_132687	0	0.266749	0	0	0	0	0.373197	0	0	0	0.403894	0
TUCP_001497	XLOC_039654	4.40217	3.26859	4.58152	3.47096	3.41174	3.69784	2.59739	2.61925	4.25755	2.17712	1.75148	4.64609
TUCP_001592	XLOC_041552	0.028063	0	0	0.070437	0	0	0	0.450423	0.011798	0	0	0
TUCP_001139	XLOC_027514	0.540581	0.729008	0.675148	0.580494	0.648854	0.503509	0.507884	0.630817	0.629321	0.887429	0.652089	0.731328
TUCP_005294	XLOC_126472	0	0.230249	0.255373	0.264875	0.152776	0.087801	0.20177	0.152433	0.55055	0.222222	0.292985	0.164077
TUCP_001495	XLOC_039654	2.26163	1.9367	1.07547	0.875242	1.2849	1.42956	1.4207	1.27985	1.59554	5.03062	5.24512	2.28258
TUCP_002378	XLOC_059047	0.768929	1.19489	1.09594	1.69702	0.835097	0.857508	0.830741	0.828434	1.45351	1.56335	1.54837	1.2261
TUCP_003304	XLOC_080201	0	0	0.08246	0	0.417697	0.018435	0.005631	0	0.014613	0	0.038221	0
TUCP_002979	XLOC_073380	0.188637	0.677235	0.162343	0	0.146807	0.083107	0.23098	0	0.302806	0.229445	0	0.280384
TUCP_005734	XLOC_137208	0	0.149598	0.080541	0	0.212892	0.345067	0	0	0	0	0.120132	0.069196
TUCP_003767	XLOC_093550	0.422532	0	0	0.081566	0.257452	0	0.123423	0	0.109689	0.119836	0.115436	0.040394
TUCP_002704	XLOC_066842	0.573447	0.697183	0.504352	0.53922	0.601054	0.392884	0.349813	0.467791	0.659337	0.770623	0.718164	0.650433
TUCP_000222	XLOC_006920	0.21653	0.233185	0.527472	0.475486	0.326961	0.169975	0.265363	0.290735	0.370299	0.612158	0.509935	0.390951
TUCP_004941	XLOC_118025	0.959258	0.097776	0.084441	0.137898	0.11503	0.18221	0.172913	0.176425	0.233337	0.080524	0.117847	0.231413
TUCP_001081	XLOC_024869	24.0643	14.1273	19.8997	19.0706	14.205	12.1239	12.1764	10.8735	16.3199	23.0789	38.9178	21.3573
TUCP_002060	XLOC_052359	0	0	0	0	0	0	0	0	0.551417	0.001178	0	0
TUCP_004411	XLOC_105876	0	0	0	0.007946	0	0	0	0	0	0.007795	0.347481	0
TUCP_001157	XLOC_028108	0.32551	0.114534	0.088582	0.197524	0	0	0.18835	0	0	0	0	0
TUCP_004581	XLOC_110542	0.512202	0.5347	0.719739	0.901136	0.492554	0.495963	0.382585	0.481671	0.99571	1.3014	0.999805	0.82457
TUCP_001715	XLOC_045421	1.01948	1.39405	1.27153	1.33091	1.45251	1.20612	1.14125	0.871107	3.40156	2.49812	1.51821	1.4448
TUCP_000992	XLOC_023793	0.431925	0.203339	0.306335	0.375688	0.156408	0.385765	0.113225	0.256588	0.384929	0.310997	0.636431	0.309768
TUCP_000954	XLOC_023370	0.351165	0.289501	0.345844	0.423557	0.306848	0.017262	0.232763	0.337826	0.348848	0.496177	0.943614	0.35944
TUCP_000964	XLOC_023398	0.504008	0	0	0.116283	0	0	0.235811	0	0.033873	0	0	0
TUCP_000658	XLOC_018595	3.33113	3.01559	3.13683	3.1995	3.03694	2.72725	2.98025	2.8428	3.81436	4.63853	4.37015	4.17394
TUCP_000605	XLOC_017111	0	0	0	0	0	0	0	0.272679	0.742959	0.237083	0	1.83277
TUCP_002973	XLOC_073342	0.119767	0.47125	0.002914	0.829478	0.432259	0.338625	0.045922	0.004193	0.427563	0.400676	0.348775	0.612305
TUCP_003007	XLOC_073895	0.465879	0.457962	0.406003	0.426587	0.356763	0.337695	0.349122	0.328903	0.462845	0.524987	0.489586	0.349881
TUCP_000538	XLOC_015728	1.95406	1.77317	3.46744	3.38102	2.42377	2.7781	2.63626	1.68334	3.7782	4.63902	4.05083	2.98667
TUCP_000181	XLOC_005240	0.1983	0.320924	0.489907	0.500119	0.715757	0.431485	0.346989	0.534329	0.760348	0.733841	0.160171	0.306392
TUCP_003084	XLOC_075377	0.123407	0.326856	0.095988	0.275095	0.091637	0.238975	0.022385	0.078054	0.154583	0.599832	0.117311	0.120253
TUCP_001879	XLOC_048102	0.555706	0.518888	0.773985	0.558328	0.469498	0.396329	0.395313	0.298131	0.662063	0.531261	0.682817	0.714394
TUCP_000390	XLOC_012310	0.368336	0.471647	0.333777	0.419956	0.268622	0.341064	0	0.337046	1.00214	0.571646	0.613123	0.386583
TUCP_005495	XLOC_130770	0.258138	0.265697	0.322731	0.336153	0.245666	0.306882	0.203841	0.387877	0.127294	0.082372	0.700319	0.092952
TUCP_000696	XLOC_019240	0.905428	1.68175	0.973288	2.20978	1.21282	0.8928	1.03027	0.936068	1.24401	1.71497	1.33583	1.55055
TUCP_001622	XLOC_042663	0.679588	0.282316	0.278484	0.451247	0.805255	0.457275	0.275169	0.426667	0.270572	0.477864	0.771103	0.376532
TUCP_002766	XLOC_067797	0.629966	0.43747	0.177419	0.177812	0.248044	0.760281	0.380693	0.236247	1.06051	0.225471	0.517593	0.233245
TUCP_002541	XLOC_063975	0.099932	1.96041	0.473073	0.957191	1.32818	0.57531	0.269133	0.301558	0.357619	0.356891	0.420201	0.743034
TUCP_000908	XLOC_022648	0.85384	0.520764	0.578116	0.657466	0.336641	0.472945	0.477485	0.588006	0.48398	0.496329	0.658424	0.549983
TUCP_002626	XLOC_065494	0.800665	0.254995	0.002392	0.10114	0.001646	0.375631	0.137282	0.334647	0.002145	0.37778	0.635965	0.001944
TUCP_001160	XLOC_028140	0.134599	0.043681	0.190377	0.145895	0.299545	0.13829	0.119405	0.12165	0.027489	0.332985	0.245384	0.182321
TUCP_003906	XLOC_096155	0.20808	0.168335	0.358916	0.084566	0	0	0.037625	0.166475	0	0	0.106244	0
TUCP_004918	XLOC_117804	0.053608	0.451997	0.084132	2.07512	0.068056	0.085163	0.124184	0.060953	0.119055	0.164519	0.073914	0.117241
TUCP_004064	XLOC_099833	0.066696	0.333571	0.493056	0.071889	0	0.227452	0.071806	0.11136	0.059897	0	0.133209	0.069765
TUCP_005083	XLOC_121521	0.274071	0.712855	0.28531	0.715264	0.262667	0.498559	0.332312	0.319372	0.514837	0.489371	0.621423	0.660178
TUCP_003561	XLOC_089626	0.453098	0.352237	0.461742	0.536657	0.304087	0.261037	0.301709	0.349406	0.558087	0.72203	0.542077	0.648131
TUCP_003750	XLOC_092972	0.297432	0.42733	0.383069	0.516999	0.302658	0.330371	0.341452	0.337649	0.459461	0.485306	0.401111	0.465643
TUCP_003071	XLOC_075253	4.12774	4.22206	4.90875	4.17098	3.98393	3.85954	3.43304	3.73274	4.5427	5.58099	5.25884	4.62668
TUCP_002997	XLOC_073804	0.469423	0.52527	0.169936	0.628498	0.095633	0.258658	0.330889	0.310005	0.399671	0.533952	0.305849	0.382384
TUCP_001551	XLOC_040393	0.427133	0.610262	0.587495	0.388283	0.007297	0.036439	0.620148	1.29482	0.384085	0.004604	0.781658	2.21176
TUCP_002922	XLOC_071588	0.707214	0.339543	0.620022	0.720146	0.450726	0.315388	0.274824	0.372639	0.529637	0.61977	0.771863	0.518988
TUCP_005488	XLOC_130711	0	0	0	0	0	0.020671	0.030124	0.010313	0	0.111768	0	0
TUCP_005417	XLOC_129086	0.189563	0.277131	0.283124	0.516842	0.229126	0.234161	0.284423	0.202369	0.405777	0.457556	0.490767	0.435948
TUCP_004748	XLOC_114063	0	0	0.145728	0	0	0	0	0	0	0	0.005985	0
TUCP_003492	XLOC_086726	0.563307	0.96779	0.901103	0.98607	0.83693	0.579718	0.496212	0.648823	0.931904	1.19154	0.955154	0.808409
TUCP_004779	XLOC_115153	5.85626	8.04602	8.79605	6.56946	5.6113	5.0504	5.1442	5.00132	7.57125	8.89477	8.45958	5.87795
TUCP_001517	XLOC_039907	0.586407	0.314152	0.352473	0.453541	0.246541	0.227891	0.213593	0.167777	0.086205	0.028205	0.547444	0.513222
TUCP_005506	XLOC_131055	0.616235	0.58414	0.480648	0.565037	0.380522	0.320683	0.354074	0.219505	0.508643	0.475399	0.458286	0.459461
TUCP_001956	XLOC_049973	0.983983	1.57821	2.20411	0.549284	0.501837	0.336294	0.274051	0.95627	0.427236	0.731737	2.31139	1.76405
TUCP_004472	XLOC_107366	1.02003	0	0	0.503012	0.927333	0	0	0	0	0	0	0
TUCP_004549	XLOC_109336	0.39169	0.503417	0.419282	0.359681	0.310913	0.371706	0.384068	0.276583	0.636522	0.638288	0.5242	0.71189
TUCP_002516	XLOC_063269	0.424981	0.581415	0.680015	1.14129	0.449866	0.6769	0.453345	0.718861	0.524677	0.564938	0.622965	0.468601
TUCP_004522	XLOC_108696	0.880618	0.43541	1.02432	0	0.756227	0	0.767826	0.696527	1.06051	1.03872	0.612307	0.433702
TUCP_001648	XLOC_043294	1.96951	1.05755	1.52537	1.60678	1.94545	0.793992	1.0008	1.74468	1.75535	2.38993	2.21462	3.19614
TUCP_004812	XLOC_115954	0.21101	0	0	0.327205	0.180871	0	0	0	0.297131	0.237231	0.142205	0.425617
TUCP_001834	XLOC_047170	0	0.310058	0.138593	0.102629	0.140232	0.191015	0	0	0.244792	0.129722	0.114949	0.164732
TUCP_003990	XLOC_097931	0	0	0	0	0.277353	0.070836	0.154731	0.063999	0.261156	0.220753	0.145443	0.239288
TUCP_005414	XLOC_129017	0	0	0.000372	0	0	0.437427	0.128756	0.140389	0	0	0.900295	0.706316
TUCP_002102	XLOC_053264	1.00537	1.41179	1.60046	1.215	1.15008	0.897915	0.925925	0.827742	1.39905	2.07827	1.54993	1.50563
TUCP_004684	XLOC_112483	2.8359	4.07715	3.17917	3.67567	2.73495	2.43217	2.38895	2.60352	3.57724	3.96181	3.18169	0.815113
TUCP_004344	XLOC_104156	0	0.191291	0.00367	0	0.155342	0.311475	0.145961	0.288827	0.271888	0.304008	0	0
TUCP_000621	XLOC_017322	0.468561	0.30459	0.549878	0.492195	0.395308	0.225793	0.402981	0.423045	0.446674	0.706818	0.610178	0.465737
TUCP_003716	XLOC_092335	1.01697	0.732838	0.781106	0.874555	0.610829	0.461896	0.472889	0.524068	0.723789	0.771083	0.861116	0.643147
TUCP_004763	XLOC_114845	0.370206	0.339433	0.645349	0.343949	0.184221	0.496643	0.445869	0.548645	0.605	0.546954	0.787733	0.569977
TUCP_002136	XLOC_054370	0.02101	0.41969	0.059166	0.14601	0.20543	0.07691	0.352596	0.083902	0.222471	0.160054	0.129892	0.222278
TUCP_001239	XLOC_030857	0	0.592065	0.694285	0.997111	0.614711	0.545514	0	0.66039	0.24103	0.380474	0.746368	0.762383
TUCP_003841	XLOC_095446	0.02177	0	0.020888	0.077687	0.035486	0.230416	0.017508	0.40638	0.58441	0.662774	0.344917	0.277909
TUCP_003360	XLOC_082032	0.766337	0.524281	0.558815	1.04946	0.524107	0.630714	0.698761	0.552976	0.645523	0.664223	0.480561	0.643021
TUCP_003043	XLOC_074963	1.97075	0.874897	0.850471	1.24777	0.641053	0.750836	1.0895	0.514972	1.08518	1.40811	1.40003	1.27906
TUCP_001043	XLOC_024247	0.046315	0.13896	1.27718	0.718875	0.532118	0.245128	0.042874	0.312595	1.34337	0.599519	0.084123	0.370945
TUCP_002348	XLOC_058518	1.04128	0.7383	0.73383	0.84232	0.598533	0.473422	0.641025	0.503091	0.809474	1.06576	0.846804	0.921636
TUCP_003053	XLOC_075176	3.2396	12.4521	10.7169	12.1991	8.15181	5.95767	8.63255	9.24628	12.2165	14.1952	12.5695	11.7571
TUCP_000591	XLOC_017014	0	0.662478	0.182504	1.04981	0	0.113082	0.443808	0.032869	0	0.038674	0	0.286268
TUCP_004267	XLOC_103277	0.298868	0.438593	0.431778	0.401179	0.187782	0.274095	0.199509	0.289237	0.342891	0.371372	0.408295	0.341833
TUCP_000974	XLOC_023585	0.342676	0.347148	0.211723	0.494624	0.395561	0.185457	0.212371	0.211649	0.252407	0.449328	0.35835	0.356567
TUCP_001168	XLOC_028500	0.515279	0.454999	0.401383	0.330773	0.606328	0.397111	0.258716	0.434035	0.447471	0.707058	0.395929	0.368195
TUCP_003207	XLOC_077739	12.9238	0	0	0	0.100279	0.033908	0	0	0	0	0	0
TUCP_004416	XLOC_106183	0.061971	0	0	0	0	0	0	0	0	0	0	0.401036
TUCP_002007	XLOC_050860	1.26649	1.37357	1.41831	1.00786	0.622215	1.05221	0.617868	0.83155	0.676616	1.15559	1.26694	1.30836
TUCP_003979	XLOC_097717	0.667718	0.851414	1.00057	0.880735	0.718575	0.686704	0.842781	0.625317	0.401589	0.733065	0.938532	0.871445
TUCP_004526	XLOC_108725	0.822089	0.945423	0.657922	0.537923	0.829139	0.381396	0.450872	0.585537	0.537802	0.928407	0.610476	0.880443
TUCP_005453	XLOC_129963	0	0.458317	0	0.050795	0.396665	0.032458	0	0	0.083831	0.056397	0	0
TUCP_002054	XLOC_051961	0.097945	0.255832	0.079734	0.274197	0	0.595527	0.255462	0.392095	0.321948	0.376899	0.02637	0.465641
TUCP_004922	XLOC_117810	4.67569	2.47088	1.34323	5.37916	0	1.04966	1.31281	2.77562	4.48007	3.78533	1.79681	1.37146
TUCP_000895	XLOC_021938	0.683058	0.573315	0.716165	0.682666	0.600764	0.669861	0.603163	0.570694	0.803257	0.888358	0.833254	0.979898
TUCP_000131	XLOC_003937	0.462784	0.350465	0.616144	0.451104	0.540464	0.506008	0.365951	0.437438	0.989434	0.438258	0.518608	0.743887
TUCP_004954	XLOC_118372	0.687946	1.08489	1.59549	2.12203	1.24128	0.906677	0.735107	0.784326	1.43344	1.21565	1.31035	0.962202
TUCP_003449	XLOC_085603	0.54948	0.233548	0.397209	0.544869	0.434092	0	0	0.52311	0	0.551475	0.966904	0.288069
TUCP_005774	XLOC_138212	0.184099	0.408834	0.348247	0.264006	0.198135	0.289832	0.112802	0.228177	0.247049	0.371396	0.38286	0.33109
TUCP_005444	XLOC_129657	0.622854	0.529546	0.530757	0.438704	0.445131	0.480304	0.476795	0.415059	0.653443	0.597503	0.722174	0.808808
TUCP_002035	XLOC_051381	0.228083	1.26198	0.591359	0.829647	0.961125	1.8259	1.71525	1.75997	2.38322	0.622499	1.49035	1.38589
TUCP_000092	XLOC_003023	0.309598	0.335124	0.437354	0.384546	0.240482	0.327025	0.232505	0.347283	0.368955	0.51174	0.394122	0.512384
TUCP_003593	XLOC_090436	0.629699	0.135578	0.452663	1.74757	0.435984	0.509132	0.918153	0.901433	0.357285	1.08191	0.744582	1.88901
TUCP_004600	XLOC_110881	0.528579	2.43345	2.7141	1.50991	1.03179	1.53547	1.75535	0.781561	2.3498	1.89048	2.02683	2.1089
TUCP_004968	XLOC_119022	0.170956	0.136945	0.173789	0.142355	0.120912	0.079625	0.225554	0.224401	0.44283	0.217102	0.26109	0.198711
TUCP_005297	XLOC_126604	0.252864	0.661035	0.506751	1.21748	0.558257	0.435238	0.418104	0.186208	0.543234	0.841725	0.494549	0.499394
TUCP_001999	XLOC_050622	0.480601	1.73788	1.69295	1.54942	0.00106	1.21913	0	1.34529	0.304432	2.39601	2.59484	0
TUCP_001143	XLOC_027749	1.81863	3.05728	3.08511	5.64309	3.20895	2.1535	2.88042	3.02851	3.84859	4.12564	3.70146	3.78647
TUCP_001175	XLOC_028621	0	2.19743	1.50821	0.172074	0.077332	1.41109	1.2961	0.86249	0.292444	0.266366	1.07903	1.59426
TUCP_005164	XLOC_123499	1.80053	1.45952	1.6604	1.7088	1.2747	1.3328	1.01694	1.37452	1.96215	2.03295	1.99911	1.40378
TUCP_002629	XLOC_065507	2.5677	2.91003	3.13162	2.70925	2.77276	2.28107	1.87155	2.42754	2.73571	3.19894	3.20262	3.35474
TUCP_001745	XLOC_046349	0.396647	0.521448	0.360236	0.546883	0.31983	0.322974	0.366319	0.328291	0.576984	0.599957	0.381729	0.534234
TUCP_000511	XLOC_015460	0.195495	0.338413	0.224266	0.08844	0.134423	0.249403	0.082465	0.19069	0.517463	0.544452	0.228217	0.36612
TUCP_000877	XLOC_021399	0.3541	0.283733	0.290553	0.33074	0.265655	0.182262	0.277675	0.283458	0.332062	0.353808	0.819612	0.413757
TUCP_005483	XLOC_130605	1.48871	1.47248	1.57311	2.15793	1.25652	1.21209	0.958843	1.11186	1.49749	2.34952	1.94107	1.94218
TUCP_004822	XLOC_116241	10.4548	8.97402	8.69116	9.26854	9.26778	7.24445	5.39463	7.01309	10.3834	11.1885	9.23981	9.83874
TUCP_001610	XLOC_042247	0	0.132103	0.182896	0.921693	0.110945	0.618531	1.42679	0.755639	1.56928	1.86857	1.42113	1.23609
TUCP_002540	XLOC_063969	2.08091	2.05595	1.35355	1.91195	2.02134	1.39426	1.19868	1.03935	1.57637	2.41814	1.0223	1.92675
TUCP_000928	XLOC_022831	0	0	0	0	0	0	0	0	0	0	0	1.75158
TUCP_000306	XLOC_009521	0.41023	0.65288	0.653067	1.35917	0.290769	0.785108	0.741405	0.77319	0.767319	0.352893	0.452972	1.0638
TUCP_002446	XLOC_060748	0	0.401892	0.200783	0.023974	0.427276	0.008765	0.12989	0.224231	0.015244	0.225481	0.120133	0.610252
TUCP_003858	XLOC_095619	1.64605	0	0	0	0	0	0	0	0	0	0	0
TUCP_003019	XLOC_074363	0	0.902767	0.005982	0.053186	0.019162	0	0.01474	0	0.048155	0.040552	0	0.004353
TUCP_004900	XLOC_117274	1.70575	1.78178	1.48965	1.34279	1.22718	0.961641	1.29075	1.30092	1.75049	1.92528	2.37234	1.81965
TUCP_004207	XLOC_102354	0	0	0.345414	0	0	0	0	0	0	0	0	0
TUCP_005559	XLOC_132708	1.33825	0.090855	0.037103	0.021657	0	0.060794	0.048432	0.047949	0.050731	0.014971	1.01739	0
TUCP_003160	XLOC_076694	0	0	0	0	0	0	0.316796	0	0.000972	0.539671	0	0.371036
TUCP_004364	XLOC_104359	0.229935	0.431156	0.239232	0.569805	0.247204	0.316326	0.215467	0.354078	0.344925	0.339206	0.366065	0.301747
TUCP_003988	XLOC_097920	0.642405	1.90716	1.92784	2.35831	1.24897	1.29764	1.36991	1.43118	1.77103	2.36409	1.4781	1.76468
TUCP_004546	XLOC_109306	0.052376	0.079727	0.048068	0.078825	0.21669	0.502755	0.603743	0.065203	0.125418	0.336131	0.112673	0.120738
TUCP_004324	XLOC_103884	0.62945	0.640292	0.471669	0.741609	0.435966	0.488681	0.437149	0.436771	0.729951	0.801555	0.641735	0.812439
TUCP_002398	XLOC_059478	1.50721	2.11666	1.70052	1.87836	1.29842	1.21207	1.39528	1.43158	1.96734	2.03148	1.82849	2.05609
TUCP_003688	XLOC_092007	1.28754	0.029055	0.717745	0.321563	0.022361	0.433431	0.091672	0.064347	1.27048	0.784995	0.8396	0.02046
TUCP_000315	XLOC_010010	0.473287	0.541394	0.505008	0	0	0	0	0.20539	0.39409	0	0.079718	0
TUCP_000031	XLOC_000750	0.300133	0.559972	0.317735	0.442548	0.213398	0.338969	0.327014	0.369741	0.311228	0.366978	0.219602	0.425297
TUCP_005674	XLOC_135765	0.130606	0.925551	0.305518	0.092425	0.064846	0.859987	0.713935	0.84426	0.237132	0.215213	0.34176	1.32603
TUCP_005718	XLOC_136993	0.016323	0.404903	0.023539	0.000289	0.390438	0.004084	0.470632	0	0	0.48126	0.033243	0.026419
TUCP_003063	XLOC_075199	0.713702	0	0.699194	0.330835	0	0.465234	0.1843	0.2178	0.128878	0.546644	0.530186	0.267597
TUCP_005700	XLOC_136381	0	0.000992	0.027075	0.349368	0.03733	0.017099	0	0	0	0	0.492026	0.022921
TUCP_003929	XLOC_096596	0.331044	0.191269	0.277162	0.512271	0.354082	0.124527	0.079623	0.255624	0.355691	0.800493	0.443847	0.723188
TUCP_004753	XLOC_114092	0.352916	0.383603	0.272116	0.594611	0.286402	0.273064	0.24368	0.294386	0.41718	0.564594	0.27837	0.277711
TUCP_003471	XLOC_086415	0.281564	0.141797	0.093938	0.432371	0.072606	0.277291	0.177191	0.26458	0.175628	0.587697	0.082357	0.29129
TUCP_003447	XLOC_085603	0.049374	2.06317	2.1544	1.37811	1.43221	1.0024	1.28843	1.73544	1.68268	0.141398	0.236564	0.038859
TUCP_003686	XLOC_091995	0.51772	0.835198	0.233477	0.597866	0.555438	0.503872	0.597849	0.528751	0.779997	0.834073	0.556132	0.758335
TUCP_003644	XLOC_091649	0.567072	0.715878	0.911224	0.803338	0.617621	0.58214	0.65323	0.577798	0.937582	0.901173	0.982612	1.04308
TUCP_004730	XLOC_113622	2.99183	2.90272	1.95999	1.7367	2.30342	2.49662	1.33883	2.60408	1.25617	3.07653	1.34241	1.6916
TUCP_002517	XLOC_063269	0.430239	0.686898	0.521774	0.6151	0.504847	0.407582	0.488325	0.412958	0.75911	0.760621	0.696285	0.846059
TUCP_003093	XLOC_075394	0	0	0.340748	0.171242	0.171439	0.169196	0	0.204203	0.174635	0.253815	0.582196	0.126323
TUCP_001664	XLOC_043612	0.530161	0.855653	0.707633	1.03194	0.577737	0.642299	0.574411	0.538087	0.790038	0.767361	0.563376	0.751775
TUCP_005352	XLOC_127538	0	0	0.093501	0	0	0	0	0	0.000971	0	0	0.041694
TUCP_001109	XLOC_025232	0.649158	0.68321	0.866168	0.741996	0.570686	0.477756	0.54776	0.652517	0.824747	0.880928	0.915045	0.762288
TUCP_002791	XLOC_068400	3.21097	2.47377	2.88882	3.12741	2.52406	2.0485	2.05458	2.2432	3.06223	3.89306	3.54851	3.49344
TUCP_005440	XLOC_129492	57.6196	47.9056	64.1444	53.276	48.8112	42.4776	42.8165	45.1713	74.107	87.3362	89.7198	82.8915
TUCP_000699	XLOC_019249	0.306099	0.180904	0.18636	0	0.350891	0.245405	0.313198	0.172718	0.021896	0.215619	0.416137	0.405364
TUCP_004953	XLOC_118372	0.532619	1.05269	0.313892	0.52076	0.288497	0.413473	0.498942	0.688755	0.395751	0.904265	0.415527	0.719692
TUCP_000932	XLOC_022910	0.573832	0.557097	0.531912	0.689391	0.479381	0.306731	0.471701	0.406452	0.717567	0.847979	0.800042	0.889648
TUCP_004527	XLOC_108799	1.02979	0.666785	0.962369	0.604192	0.732633	0.749346	0.542896	0.656328	0.925498	1.3119	1.31087	1.10112
TUCP_000436	XLOC_013500	0.60088	0.461535	0.478045	0.673403	0.371731	0.536335	0.389378	0.415137	0.447148	0.597842	0.576376	0.61807
TUCP_005703	XLOC_136395	0.615596	0.524388	0.616787	0.972251	0.470201	0.425614	0.605462	0.051214	0.515961	0.598394	0.438416	0.437565
TUCP_003282	XLOC_079034	0.430778	0.601096	0.573476	0.428783	0.449767	0.507027	0.41389	0.22228	0.503922	0.402092	0.35386	0.329126
TUCP_003951	XLOC_096923	0.641954	0	0.162168	0.089792	0.491663	0.485997	0.478349	0.32469	0.204085	0.137844	0.019708	0.101113
TUCP_002883	XLOC_070358	0.288484	0.114296	0.114586	0.635569	0.181835	0.39246	0	0.213577	0.142423	0.320441	0.121887	0.227912
TUCP_001468	XLOC_038849	1.15241	0	0	0.62292	0.01306	2.84997	1.14314	2.28893	1.12214	0	0	3.29274
TUCP_003038	XLOC_074661	0.742138	0.323711	0.605523	0.543607	0.347607	0.273434	0.503125	0.381961	0.639041	0.782828	0.497174	0.455201
TUCP_001068	XLOC_024592	0.54163	0.519412	0.760948	0.375291	0.646779	0.366236	0.544932	0.365185	0.607835	0.776213	0.693625	0.893825
TUCP_001346	XLOC_033864	1.04591	1.86553	1.61255	1.64784	1.32459	1.11476	1.2623	1.06909	1.88416	2.04123	2.03012	2.37546
TUCP_005285	XLOC_126151	0.969892	0.523261	0.56028	0.525502	0.360221	0.16693	0.161068	0.356677	0.581505	0.587111	0.663941	0.550183
TUCP_001668	XLOC_043766	0	0.083016	0.002485	0.011782	0	0.062529	0.058231	0	0.445255	0.00401	0.00504	0.001074
TUCP_001782	XLOC_046594	0.260513	0	0	0.022894	0	0.255545	0	0	0	0	0.349988	0.174743
TUCP_001030	XLOC_024100	0.842622	1.07714	0.385181	1.06063	0.745341	1.07413	0.329444	1.06139	0.565871	0.893629	0.778639	0.930231
TUCP_002841	XLOC_069643	0.635802	0.194914	0.218673	0.468299	0.440873	0.413543	0.359659	0.351163	0.511176	0.533594	0.332617	0.722843
TUCP_000271	XLOC_008260	0.607445	0.654283	0.719548	0.749484	0.576651	0.575997	0.527521	0.54955	1.04343	1.01892	0.929055	0.884357
TUCP_003268	XLOC_078808	3.48079	2.50961	3.65902	5.76117	3.91229	2.65525	2.57651	0.525016	4.81904	5.93492	5.17829	5.30012
TUCP_003012	XLOC_073952	0.797158	0	0.524467	0.716066	0.483549	2.9705	0.02151	0.008882	0.499302	3.26018	1.904	0.683561
TUCP_000442	XLOC_013597	0.280627	0.237931	0.48253	0.277889	0.236431	0.188822	0.354333	0.239969	0.340756	0.320009	0.378013	0.329508
TUCP_000015	XLOC_000270	0.24903	1.72128	0.052126	0.40596	0.036508	5.36053	2.08994	5.17949	1.31648	0.324097	0.034572	3.43771
TUCP_005407	XLOC_128915	0	1.27412	0	0	0.404285	0	0	1.89555	0	0	0.004068	1.07586
TUCP_004339	XLOC_104111	0.468406	0.336445	0.575107	0.385618	0.306085	0.302105	0.172255	0.248878	0.556893	0.228121	0.308103	0.649247
TUCP_005368	XLOC_128360	0.200573	0.12292	0.133895	0	0.499604	0.22718	0.303391	0.204111	0.098132	0.590119	0.293634	0.273964
TUCP_003683	XLOC_091972	0.043276	0.718602	0.031156	0.040887	0.03741	0.030665	0.017771	0.035358	0.873811	0.018362	0.098827	0.016175
TUCP_003409	XLOC_083664	0.186286	0.562056	0.144921	0.175973	0.692316	0.109236	0.032103	0.089024	0.14963	0.021286	0.139538	0.137282
TUCP_000206	XLOC_006632	0.300552	0.388671	0.335179	0.461026	0.364041	0.263881	0.323926	0.368301	0.631029	0.6064	0.511962	0.498008
TUCP_001861	XLOC_047489	0.192699	0.332347	0.338464	0.085045	0.214088	0.127156	0.436105	0.351352	0.191959	0.198478	0.143493	0.200125
TUCP_001602	XLOC_042092	0.718285	0.841416	0.656233	0.761047	0.691677	0.511145	0.548491	0.547155	0.918331	0.824978	0.819117	0.689773
TUCP_002487	XLOC_062468	0.272532	0.546747	0.608562	0.743819	0.418965	0.400984	0.463642	0.477259	0.717028	0.630222	0.666009	0.614328
TUCP_003065	XLOC_075204	0.456325	0.625616	0.45029	0.299871	0.473221	0.350844	0.333887	0.350317	0.288056	0.51947	0.688548	0.680902
TUCP_001189	XLOC_029223	0	0.406569	0	0.354275	0	0.201146	0.225818	0	0.63697	0.340806	0.374698	0
TUCP_002663	XLOC_066198	0.569513	0.572537	0.572459	0.586648	0.497429	0.352123	0.437966	0.505486	0.711484	0.76261	0.755159	0.591637
TUCP_000333	XLOC_010841	0.131561	0.239722	0.144938	0	0.127358	0.152706	0.04847	0.054058	0.121962	0.381653	0.016159	0.035232
TUCP_002198	XLOC_055816	0.838617	1.12971	0.893457	0.83517	0.681981	0.68032	0.739615	0.619364	0.838581	1.24167	1.09367	1.07829
[truncated: 4,481 more rows]

## Sheet: mRNA
Transcript_id	Gene_id	Official_Symbol	control1.fpkm	control2.fpkm	control3.fpkm	control4.fpkm	control5.fpkm	control6.fpkm	surgery1.fpkm	surgery2.fpkm	surgery3.fpkm	surgery4.fpkm	surgery5.fpkm	surgery6.fpkm
[truncated: 57,825 more rows]

[truncated: 1 more sheets: microRNA]
