# Supplementary material for: The role of lncRNAs related ceRNA regulatory network in multiple hippocampal pathological processes during the development of perioperative neurocognitive disorders
Source: PeerJ. 2024 Aug 9;12:e17775. doi: 10.7717/peerj.17775 (PMC11318589; doi:10.7717/peerj.17775)
Supplement: Supplemental Information 3 [file peerj-12-17775-s003.xlsx]

## Sheet: Sheet1
Context test					Context test
POD 2		POD 7			POD 2		POD 7
Control	Surgery	Control	Surgery		Control	Surgery	Control	Surgery
63.96	27.53	42.27	19.48		93.42	54.32	54.98	36.52
54.37	37.44	26.48	28.56		50.22	58.79	34.48	29.31
43.07	28.97	21.37	19.47		54.32	25.73	36.24	15.57
58.79	28.56	44.34	21.4		26.38	42.25	17.64	32.56
33.06	22.67	29.59	12.47		79.57	28.33	39.02	31.89
60.72	13.58	43.45	9.6		77.65	36.46	58.86	14.56
26.78	23.15	24.28	22.45		63.28	63.46	56.26	55.37
64.33	42.77	62.13	38.91		77	27.37	48.14	17.12
78.16	12.48	52.87	14.36		46	36.89	25.58	25.33
18.99	23.01	20.95	24.56		28.33	47.27	35.28	43.28
34.31	36.57	31.51	18.48		105.35	91.18	82.68	55.17
40.6	49.83	36.76	39.18		45.77	55.37	43.25	48.56
