# Supplementary material for: The role of lncRNAs related ceRNA regulatory network in multiple hippocampal pathological processes during the development of perioperative neurocognitive disorders
Source: PeerJ. 2024 Aug 9;12:e17775. doi: 10.7717/peerj.17775 (PMC11318589; doi:10.7717/peerj.17775)
Supplement: Supplemental Information 4 [file peerj-12-17775-s004.xls]

## Sheet: Sheet1
ITEM TO CHECK	IMPORTANCE	CHECKLIST
EXPERIMENTAL DESIGN
Definition of experimental and control groups	E	P6 L2
Number within each group	E	P6 L3
Assay carried out by core lab or investigator's lab?	D	/
Acknowledgement of authors' contributions	D	P23 L19
SAMPLE
Description	E	P7 L15
Volume/mass of sample processed	D	/
Microdissection or macrodissection	E	P7 L16
Processing procedure	E	P7 L15
If frozen - how and how quickly?	E	P7 L16
If fixed - with what, how quickly?	E	NA
Sample storage conditions and duration (especially for FFPE samples)	E	P7 L16
NUCLEIC ACID EXTRACTION
Procedure and/or instrumentation	E	p7 L16
Name of kit and details of any modifications	E	p7 L17
Source of additional reagents used	D	NA
Details of DNase or RNAse treatment	E	P7 L18
Contamination assessment (DNA or RNA)	E	P7 L19
Nucleic acid quantification	E	P7 L19
Instrument and method	E	P7 L19
Purity (A260/A280)	D	/
Yield	D	/
RNA integrity method/instrument	E	P7 L21
RIN/RQI or Cq of 3' and 5' transcripts	E	NA
Electrophoresis traces	D	/
Inhibition testing (Cq dilutions, spike or other)	E	NA
REVERSE TRANSCRIPTION
Complete reaction conditions	E	P11 L3
Amount of RNA and reaction volume	E	P11 L5
Priming oligonucleotide (if using GSP) and concentration	E	P11 L8
Reverse transcriptase and concentration	E	P1 L8
Temperature and time	E	P11 L9
Manufacturer of reagents and catalogue numbers	D	P11 L3
Cqs with and without RT	D*	/
Storage conditions of cDNA	D	/
qPCR TARGET INFORMATION
If multiplex, efficiency and LOD of each assay.	E	NA
Sequence accession number	E	SUP T1
Location of amplicon	D	/
Amplicon length	E	SUP T1
In silico specificity screen (BLAST, etc)	E	P11 L8
Pseudogenes, retropseudogenes or other homologs?	D	/
Sequence alignment	D	/
Secondary structure analysis of amplicon	D	/
Location of each primer by exon or intron (if applicable)	E	NA
What splice variants are targeted?	E	NA
qPCR OLIGONUCLEOTIDES
Primer sequences	E	SUP T1
RTPrimerDB Identification Number	D	/
Probe sequences	D**	NA
Location and identity of any modifications	E	NA
Manufacturer of oligonucleotides	D	/
Purification method	D	/
qPCR PROTOCOL
Complete reaction conditions	E	P11 L10
Reaction volume and amount of cDNA/DNA	E	P11 L11
Primer, (probe), Mg++ and dNTP concentrations	E	P11 L11
Polymerase identity and concentration	E	P11 L11
Buffer/kit identity and manufacturer	E	P11 L11
Exact chemical constitution of the buffer	D	NA
Additives (SYBR Green I, DMSO, etc.)	E	P11 L11
Manufacturer of plates/tubes and catalog number	D	/
Complete thermocycling parameters	E	P11 L16
Reaction setup (manual/robotic)	D	P11 L3
Manufacturer of qPCR instrument	E	P11 L3
qPCR VALIDATION
Evidence of optimisation (from gradients)	D	/
Specificity (gel, sequence, melt, or digest)	E	melt curve
For SYBR Green I, Cq of the NTC	E	Undetectable
Standard curves with slope and y-intercept	E	NA
PCR efficiency calculated from slope	E	NA
Confidence interval for PCR efficiency or standard error	D	/
r2 of standard curve	E	NA
Linear dynamic range	E	Linear across 4 log quantities
Cq variation at lower limit	E	NA
Confidence intervals throughout range	D	/
Evidence for limit of detection	E	NA
If multiplex, efficiency and LOD of each assay.	E	NA
DATA ANALYSIS
qPCR analysis program (source, version)	E	P11 L24
Cq method determination	E	P11 L20
Outlier identification and disposition	E	NA
Results of NTCs	E	P11 L15
Justification of number and choice of reference genes	E	NA
Description of normalisation method	E	NA
Number and concordance of biological replicates	D	SUP T1
Number and stage (RT or qPCR) of technical replicates	E	P11 L19
Repeatability (intra-assay variation)	E	P19 L15
Reproducibility (inter-assay variation, %CV)	D	/
Power analysis	D	P12 L2
Statistical methods for result significance	E	P12 L1
Software (source, version)	E	P11 L24
Cq or raw data submission using RDML	D	/
Table 1. MIQE checklist for authors, reviewers and editors. All essential information (E) must be submitted with the manuscript. Desirable
information (D) should be submitted if available. If using primers obtained from RTPrimerDB, information on qPCR target, oligonucleotides,
protocols and validation is available from that source.
*: Assessing the absence of DNA using a no RT assay is essential when first extracting RNA. Once the sample has been validated as
RDNA-free, inclusion of a no-RT control is desirable, but no longer essential.
**: Disclosure of the probe sequence is highly desirable and strongly encouraged. However, since not all commercial pre-designed assay
vendors provide this information, it cannot be an essential requirement. Use of such assays is advised against.
